# Supplementary material for: Nicotinamide mononucleotide adenylyltransferase uses its NAD+ substrate-binding site to chaperone phosphorylated Tau
Source: eLife. 2020 Apr 6;9:e51859. doi: 10.7554/eLife.51859 (PMC7136026; doi:10.7554/eLife.51859)
Supplement: Figure 1—source data 1. [file elife-51859-fig1-data1.xlsx]

## Sheet: Fig.1B
	Fig. 1B	ThT fluorescence profiles of pTau23 in the absence or presence of various NMNATs at the indicated concentrations
		pTau23 60μM						pTau23:hN1=4:1						pTau23:hN1=2:1						pTau23:hN1=1:1
	Time (h)	# Repeat 1	# Repeat 2	# Repeat3	# Repeat 4	# Repeat 5	Average	# Repeat 1	# Repeat 2	# Repeat3	# Repeat 4	# Repeat 5	Average	# Repeat 1	# Repeat 2	# Repeat3	# Repeat 4	# Repeat 5	Average	# Repeat 1	# Repeat 2	# Repeat3	# Repeat 4	# Repeat 5	Average
	0	28.8178	29.0971	29.013	28.3299	30.4163	29.1348	31.7068	32.3025	31.441	32.6087	32.639	32.1396	29.0164	30.8437	29.2469	29.644	29.3781	29.6258	30.1841	29.5363	29.2755	29.0349	29.6608	29.5383
	6.08	38.4456	39.0194	38.0384	37.4125	40.3133	38.6458	34.9273	35.7282	34.6446	36.2616	36.1573	35.5438	32.0181	34.1045	32.3445	32.5734	32.0955	32.6272	32.4404	32.2755	31.6496	31.2256	31.7691	31.8721
	12.065	50.7504	51.8525	50.1312	49.0695	53.0993	50.9806	42.9045	43.9393	42.7076	44.8294	44.8479	43.8457	40.5085	42.9314	40.8669	41.1798	40.352	41.1677	38.9639	38.7266	37.8971	37.3065	37.9913	38.1771
	18.05	59.2425	60.4556	58.2615	57.326	62.1382	59.4848	47.6864	48.8087	47.5114	49.8587	50.0353	48.7801	44.6426	47.3684	45.0633	45.3358	44.476	45.3772	42.5932	42.3173	41.444	40.7323	41.2068	41.6587
	24.035	64.5511	66.0873	63.8629	62.3519	67.5932	64.8893	50.2675	51.6153	50.1615	52.465	52.7443	51.4507	45.0683	47.9657	45.4587	46.0022	45.0885	45.9167	44.0655	43.8013	42.711	41.9387	42.3577	42.9748
	30.02	73.4234	74.4498	72.3331	70.9769	76.3831	73.5133	54.8038	56.0321	54.8341	57.0686	57.146	55.9769	50.3332	53.1313	50.7067	51.1761	50.0538	51.0802	47.8177	47.2776	46.0476	45.383	45.674	46.44
	36.005	79.6473	80.7175	78.2525	76.4302	82.9974	79.609	58.0849	59.7725	58.1993	60.9184	61.1068	59.6164	52.8453	56.2441	53.5419	54.1308	52.9143	53.9353	50.3382	49.7442	48.5244	47.5922	47.9624	48.8323
	42.085	85.6828	86.9565	84.4023	82.0299	88.5197	85.5182	61.0328	62.7272	61.3609	63.9117	64.292	62.6649	56.1482	59.1651	56.6261	57.1763	55.6838	56.9599	53.3097	52.396	51.2165	50.1548	50.488	51.513
	48.07	90.6279	91.9336	89.3929	86.7916	94.0419	90.5576	63.5684	65.6902	64.1254	66.7873	66.9101	65.4163	57.496	61.2582	58.1219	58.7057	57.4522	58.6068	55.0478	54.4555	52.9799	51.94	52.0057	53.2858
	54.055	95.9113	97.074	93.9729	91.3212	98.627	95.3813	65.8669	68.0559	66.4575	69.3885	69.3027	67.8143	60.6794	64.2516	61.4114	61.7311	60.072	61.6291	57.3008	56.2525	55.0848	53.9423	54.0483	55.3258
	60.04	100.239	101.805	98.7683	95.6505	103.54	100.001	68.061	70.3089	68.6162	71.618	71.5675	70.0343	63.0889	66.6005	63.6644	64.1405	62.2762	63.9541	59.5925	58.5459	56.9861	55.9547	55.8184	57.3795
		pTau23 60μM						pTau23:hN2=4:1						pTau23:hN2=2:1						pTau23:hN2=1:1
	Time (h)	# Repeat 1	# Repeat 2	# Repeat3	# Repeat 4	# Repeat 5	Average	# Repeat 1	# Repeat 2	# Repeat3	# Repeat 4	# Repeat 5	Average	# Repeat 1	# Repeat 2	# Repeat3	# Repeat 4	# Repeat 5	Average	# Repeat 1	# Repeat 2	# Repeat3	# Repeat 4	# Repeat 5	Average
	0	33.1589	33.4128	33.0264	33.2627	34.5896	33.4901	34.647	32.958	31.6576	31.1918	31.3485	32.3606	33.2318	33.9626	35.4528	35.7465	34.4924	34.5772	33.117	33.3841	34.5675	35.221	34.1303	34.084
	6.055	43.9131	44.5202	43.5245	43.7034	40.9237	43.317	44.7587	42.3301	40.2217	39.6675	40.1908	41.4337	39.1178	40.0671	41.8356	41.9084	40.1753	40.6208	38.5702	38.78	40.3541	40.9745	40.1797	39.7717
	12.0139	51.6294	52.0422	50.9317	51.1481	47.4654	50.6434	50.064	47.2248	44.5732	44.1935	44.1405	46.0392	40.7096	42.063	43.5466	43.9175	41.8731	42.422	39.0339	38.9522	40.8752	41.5287	40.7626	40.2305
	18.165	60.1713	60.752	59.8689	59.5112	55.0382	59.0683	55.5703	52.3116	49.7284	48.8387	48.693	51.0284	42.8534	44.1714	45.8228	46.2732	43.9705	44.6183	40.1311	39.5461	41.3653	42.0983	41.7649	40.9811
	24.0278	66.9272	67.3754	66.3708	65.9845	60.8072	65.493	58.4139	55.4555	52.6162	51.53	51.232	53.8495	44.3238	45.6683	47.2999	47.7216	45.3923	46.0812	40.0826	39.0493	40.5837	41.2483	42.0563	40.6041
	30.275	73.5903	74.0098	72.9169	72.4555	66.3642	71.8674	61.6682	57.8266	54.9013	53.8879	53.7466	56.4061	45.4343	46.653	48.13	48.6996	46.3792	47.0592	39.2193	38.0646	39.0869	40.1621	42.5288	39.8123
	36.0417	79.7368	80.2049	78.9619	77.9662	71.5194	77.6778	64.5096	60.7454	57.8244	56.2525	55.9633	59.059	46.3726	47.3771	49.1279	49.3929	47.3396	47.922	38.8572	38.3583	38.6652	40.1311	43.5709	39.9165
	42.0006	86.2057	87.4465	85.4241	84.6315	77.072	84.156	67.2032	63.4278	60.3303	58.7605	58.6215	61.6687	46.9577	48.0748	49.6158	50.3665	47.9556	48.5941	38.9544	38.4819	38.9676	40.2857	44.273	40.1925
	48.0556	92.6083	93.955	91.8334	90.5285	83.1942	90.4239	70.2786	65.9933	62.8339	61.4298	61.0787	64.3229	48.0196	49.3377	50.404	51.1149	49.1125	49.5977	39.131	39.0869	39.5726	40.9701	45.5491	40.8619
	54.0144	96.4234	98.1852	96.3969	95.2621	86.4684	94.5472	71.1882	66.6843	63.7502	61.9022	61.8183	65.0687	47.3793	48.4192	49.7682	50.4725	48.2735	48.8625	39.2789	38.9698	39.0537	40.3762	45.2422	40.5842
	60.0694	102.285	104.409	101.936	100.3	91.0695	100	73.7824	68.9937	65.5054	64.0217	63.6199	67.1846	47.9732	49.4149	50.0839	50.4416	48.7129	49.3253	39.6565	39.4401	39.1111	40.9061	45.9266	41.0081
		pTau23 60μM						pTau23:hN3=4:1						pTau23:hN3=2:1						pTau23:hN3=1:1
	Time (h)	# Repeat 1	# Repeat 2	# Repeat3	# Repeat 4	# Repeat 5	Average	# Repeat 1	# Repeat 2	# Repeat3	# Repeat 4	# Repeat 5	Average	# Repeat 1	# Repeat 2	# Repeat3	# Repeat 4	# Repeat 5	Average	# Repeat 1	# Repeat 2	# Repeat3	# Repeat 4	# Repeat 5	Average
	0	28.8178	29.0971	29.013	28.3299	30.4163	29.1348	29.8391	30.2665	30.3692	30.9715	31.7741	30.6441	30.0814	30.8235	30.6468	31.2559	32.2537	31.0122	31.441	29.962	30.7595	31.2744	32.3883	31.165
	6.08	38.4456	39.0194	38.0384	37.4125	40.3133	38.6458	32.1662	32.3647	32.22	33.0714	33.5324	32.671	29.6726	30.0848	29.9351	30.6872	31.8128	30.4385	30.3591	28.9692	29.58	30.0057	31.1196	30.0067
	12.065	50.7504	51.8525	50.1312	49.0695	53.0993	50.9806	40.453	40.6145	40.8871	41.4255	41.8731	41.0506	36.0883	36.8589	36.5763	37.2375	38.7367	37.0995	35.2605	33.9733	34.436	34.8516	36.5729	35.0188
	18.05	59.2425	60.4556	58.2615	57.326	62.1382	59.4848	46.0644	46.5456	46.8233	47.5316	47.8968	46.9723	41.7351	42.3476	42.1221	43.0172	44.4424	42.7329	41.6341	39.9128	40.2174	40.8198	42.8305	41.0829
	24.035	64.5511	66.0873	63.8629	62.3519	67.5932	64.8893	49.7173	50.0808	50.175	51.1071	51.2704	50.4701	45.6976	46.8435	46.6769	47.3398	48.664	47.0444	46.2041	44.5349	45.1676	45.8962	48.0532	45.9712
	30.02	73.4234	74.4498	72.3331	70.9769	76.3831	73.5133	55.3473	55.7965	55.8756	57.1376	57.6323	56.3579	52.216	53.446	52.9748	54.1005	55.7006	53.6876	52.0006	50.0034	51.235	51.8273	53.8262	51.7785
	36.005	79.6473	80.7175	78.2525	76.4302	82.9974	79.609	59.0086	59.8163	59.7338	61.1253	61.3609	60.209	56.5823	57.5868	57.2049	58.5324	60.2504	58.0314	55.391	53.2811	54.9906	55.5576	57.4438	55.3328
	42.085	85.6828	86.9565	84.4023	82.0299	88.5197	85.5182	62.6178	63.412	63.6543	65.1568	65.4816	64.0645	60.1915	61.482	60.7215	62.2476	63.6408	61.6567	58.0512	55.8672	57.8476	58.3103	60.2218	58.0596
	48.07	90.6279	91.9336	89.3929	86.7916	94.0419	90.5576	65.1585	66.2118	66.3986	68.2141	68.6987	66.9363	62.6043	64.0867	63.3749	65.2292	66.5904	64.3771	59.9189	58.0613	59.8533	60.666	62.6582	60.2315
	54.055	95.9113	97.074	93.9729	91.3212	98.627	95.3813	68.4917	69.7957	69.5282	71.7425	71.9646	70.3045	64.8674	66.587	65.9931	67.7278	68.9797	66.831	62.1568	59.9441	62.0541	63.1932	64.8758	62.4448
	60.04	100.239	101.805	98.7683	95.6505	103.54	100.001	70.9651	72.3112	71.7963	74.5474	74.751	72.8742	67.2382	69.0924	68.278	69.9186	71.2461	69.1547	64.0901	62.2358	64.3811	65.0491	67.0565	64.5625
		pTau23 60μM						pTau23:mN3=4:1						pTau23:mN3=2:1						pTau23:mN3=1:1
	Time (h)	# Repeat 1	# Repeat 2	# Repeat3	# Repeat 4	# Repeat 5	Average	# Repeat 1	# Repeat 2	# Repeat3	# Repeat 4	# Repeat 5	Average	# Repeat 1	# Repeat 2	# Repeat3	# Repeat 4	# Repeat 5	Average	# Repeat 1	# Repeat 2	# Repeat3	# Repeat 4	# Repeat 5	Average
	0	38.1592	36.8484	38.6044	39.5092	38.9375	38.4117	32.6293	32.5313	33.2847	32.4547	31.338	32.4476	33.0264	30.5241	34.5491	33.8831	34.1181	33.2202	38.6294	35.7798	35.819	35.534	35.3737	36.2272
	6.08	41.6873	39.9152	42.7523	43.8173	43.1317	42.2608	37.2669	37.1975	38.2536	37.762	36.4334	37.3827	38.8787	36.7878	40.9571	39.2313	39.7781	39.1266	48.4283	44.3499	43.5929	42.9251	42.8111	44.4215
	12.065	47.6874	44.0649	47.9563	49.6483	48.4621	47.5638	48.3375	47.4345	48.4123	47.5325	45.707	47.4847	52.5281	48.4158	53.4756	51.2689	50.7649	51.2907	53.3847	49.3936	48.1344	47.0569	46.886	48.9711
	18.05	55.5629	49.5788	56.3447	58.0616	56.3073	55.1711	61.4526	59.652	60.1685	58.1952	56.172	59.128	56.9841	52.6866	57.5433	56.4623	54.9734	55.7299	56.2112	52.163	50.4675	48.8878	48.6865	51.2832
	24.035	67.6967	59.8408	70.0351	72.8419	69.3868	67.9602	69.7466	68.1277	69.2924	67.0733	65.0982	67.8676	60.0812	55.6484	61.0501	60.0563	58.7455	59.1163	61.4917	56.7419	54.7508	52.9342	52.7347	55.7306
	30.02	77.8803	68.678	81.7842	87.2055	80.2632	79.1622	73.5347	72.4804	73.8482	71.2052	69.0929	72.0323	61.6556	57.7695	63.0465	62.3787	60.9396	61.158	64.767	60.026	57.7232	55.8247	55.0126	58.6707
	36.005	85.1021	75.3281	89.7024	95.5743	88.4148	86.8243	76.2293	74.9292	76.4804	74.2168	71.8089	74.7329	64.1401	59.8782	65.0323	64.6619	62.8097	63.3044	67.4651	62.4499	59.7108	57.8051	56.8042	60.847
	42.085	89.5047	80.2169	94.7782	100.476	94.8583	91.9667	77.4154	76.3362	77.5045	75.2622	72.8098	75.8656	66.3039	62.1186	67.4509	66.8275	65.3618	65.6126	69.3316	63.8818	61.4401	59.3706	58.286	62.462
	48.07	92.3169	82.7263	98.162	103.566	98.3508	95.0243	79.3175	78.3558	79.8768	77.0717	74.2827	77.7809	68.881	64.2238	69.784	68.9523	67.1321	67.7946	70.5373	65.2371	62.3448	60.4143	59.1426	63.5352
	54.055	95.1789	85.8644	101.12	105.834	101.749	97.9494	80.9418	79.4137	81.0486	78.6087	75.8286	79.1683	71.353	66.6904	72.4394	71.1429	69.3441	70.1939	71.5988	66.3681	63.5042	61.3831	59.9405	64.5589
	60.04	96.4701	87.3195	103.457	108.486	104.271	100.001	82.2935	80.8848	82.4022	80.2971	77.2124	80.618	73.5792	68.4358	74.6104	73.508	71.4901	72.3247	73.0218	67.7358	64.6494	62.4072	60.6547	65.6938
		pTau23 60μM						pTau23:PC=4:1						pTau23:PC=2:1						pTau23:PC=1:1
	Time (h)	# Repeat 1	# Repeat 2	# Repeat3	# Repeat 4	# Repeat 5	Average	# Repeat 1	# Repeat 2	# Repeat3	# Repeat 4	# Repeat 5	Average	# Repeat 1	# Repeat 2	# Repeat3	# Repeat 4	# Repeat 5	Average	# Repeat 1	# Repeat 2	# Repeat3	# Repeat 4	# Repeat 5	Average
	0	28.8178	29.0971	29.013	28.3299	30.4163	29.1348	33.5896	33.1219	32.289	34.1331	34.4023	33.5072	31.5722	30.7747	30.4869	29.5228	30.7713	30.6256	34.4713	32.8241	31.7775	31.801	31.9558	32.566
	6.08	38.4456	39.0194	38.0384	37.4125	40.3133	38.6458	41.3649	39.8439	39.4249	41.9336	41.5971	40.8329	35.8914	33.948	34.0019	33.3103	34.7927	34.3889	34.9626	32.6053	31.3282	31.5739	31.5436	32.4027
	12.065	50.7504	51.8525	50.1312	49.0695	53.0993	50.9806	52.1302	50.143	50.1582	52.7174	52.1537	51.4605	46.2259	43.3622	43.8821	42.8069	45.0044	44.2563	41.8647	39.0059	37.219	37.5084	37.4983	38.6193
	18.05	59.2425	60.4556	58.2615	57.326	62.1382	59.4848	59.3973	57.3933	57.4354	60.3614	59.1062	58.7387	52.1369	48.8828	49.3842	48.6253	50.668	49.9394	46.3336	42.7446	40.8686	40.9089	40.7626	42.3237
	24.035	64.5511	66.0873	63.8629	62.3519	67.5932	64.8893	63.629	61.1438	61.5662	64.5831	62.9442	62.7733	54.0517	50.3382	51.1391	50.3012	52.2294	51.6119	49.263	44.7335	42.5713	42.637	42.4485	44.3307
	30.02	73.4234	74.4498	72.3331	70.9769	76.3831	73.5133	70.6067	67.7379	68.3134	71.7526	69.9842	69.679	60.3816	56.4864	57.745	56.7438	58.6418	57.9997	54.1038	48.8222	46.7795	46.4716	46.0257	48.4406
	36.005	79.6473	80.7175	78.2525	76.4302	82.9974	79.609	75.7067	72.4946	73.4638	77.2429	74.7442	74.7304	64.6049	60.0569	61.3777	60.7535	62.8685	61.9323	57.8258	52.2294	49.6769	49.2798	48.8962	51.5816
	42.085	85.6828	86.9565	84.4023	82.0299	88.5197	85.5182	79.9283	76.7836	77.9109	81.9845	78.9844	79.1183	69.0352	64.1473	65.7811	65.283	67.1019	66.2697	62.0726	55.6872	52.8722	52.4061	51.829	54.9734
	48.07	90.6279	91.9336	89.3929	86.7916	94.0419	90.5576	84.3771	80.6653	82.0299	86.3155	83.2885	83.3352	71.5052	66.5365	68.2477	67.8607	69.8513	68.8003	65.638	57.7854	55.1757	54.5279	54.0079	57.427
	54.055	95.9113	97.074	93.9729	91.3212	98.627	95.3813	87.9997	83.9867	85.7652	89.7766	86.9935	86.9044	76.1257	70.7868	72.4088	71.8468	73.982	73.03	68.8114	60.5448	57.7029	57.1426	56.2559	60.0915
	60.04	100.239	101.805	98.7683	95.6505	103.54	100.001	91.1697	87.4428	88.9925	93.0728	90.066	90.1487	79.1712	73.8558	75.2507	74.8906	77.0847	76.0506	72.1783	63.1848	60.2638	59.5033	58.4062	62.7073
		pTau23 60μM						pTau23:PD=4:1						pTau23:PD=2:1						pTau23:PD=1:1
	Time (h)	# Repeat 1	# Repeat 2	# Repeat3	# Repeat 4	# Repeat 5	Average	# Repeat 1	# Repeat 2	# Repeat3	# Repeat 4	# Repeat 5	Average	# Repeat 1	# Repeat 2	# Repeat3	# Repeat 4	# Repeat 5	Average	# Repeat 1	# Repeat 2	# Repeat3	# Repeat 4	# Repeat 5	Average
	0	38.1592	36.8484	38.6044	39.5092	38.9375	38.4117	43.8547	44.82	42.9928	41.4825	41.9349	43.017	43.0533	40.9037	42.4282	41.0515	39.8956	41.4665	45.9242	41.486	39.0568	38.063	37.5145	40.4089
	6.08	41.6873	39.9152	42.7523	43.8173	43.1317	42.2608	52.2271	52.6528	50.0632	48.7506	49.0107	50.5409	45.0747	43.5288	45.1192	43.6197	42.2412	43.9167	56.0687	51.7676	49.2938	48.1024	46.9358	50.4337
	12.065	47.6874	44.0649	47.9563	49.6483	48.4621	47.5638	55.4703	55.1105	52.4319	50.4835	51.0695	52.9131	50.797	48.9857	49.951	48.2057	46.6562	48.9191	61.9815	56.806	53.7855	52.1612	51.1122	55.1693
	18.05	55.5629	49.5788	56.3447	58.0616	56.3073	55.1711	61.5327	59.6057	57.6003	54.9645	55.1337	57.7674	58.5816	57.7962	57.0714	56.8701	54.5727	56.9784	65.7732	59.1765	55.7606	54.1417	52.7383	57.518
	24.035	67.6967	59.8408	70.0351	72.8419	69.3868	67.9602	73.3726	69.5898	67.2105	64.0011	63.5826	67.5513	65.6664	64.8453	63.7589	64.0385	61.2549	63.9128	69.6166	62.587	58.8381	56.7935	55.2494	60.6169
	30.02	77.8803	68.678	81.7842	87.2055	80.2632	79.1622	83.1484	78.037	75.9479	72.1687	70.9808	76.0566	69.9567	68.7136	67.7483	67.8765	64.4678	67.7526	71.1785	63.8604	60.1934	58.2896	56.0616	61.9167
	36.005	85.1021	75.3281	89.7024	95.5743	88.4148	86.8243	91.3035	85.3212	83.3087	79.7182	77.2391	83.3782	73.4955	71.9692	70.5907	70.9487	67.2479	70.8504	73.9051	65.921	61.4098	59.424	57.2049	63.573
	42.085	89.5047	80.2169	94.7782	100.476	94.8583	91.9667	97.3748	90.8583	88.8262	85.0897	81.9872	88.8272	75.606	74.3878	72.7048	73.3513	69.2283	73.0556	74.6532	66.4197	61.8604	59.4507	57.4703	63.9709
	48.07	92.3169	82.7263	98.162	103.566	98.3508	95.0243	102.098	95.7595	93.1985	90.0853	86.2847	93.4852	77.6078	77.0503	75.2961	75.6238	71.0841	75.3324	76.3166	67.4616	62.9967	60.8488	57.8799	65.1007
	54.055	95.1789	85.8644	101.12	105.834	101.749	97.9494	107.208	100.027	97.2698	93.3231	89.5385	97.4732	80.4128	79.9943	77.7663	78.0032	73.5329	77.9419	76.8616	67.9709	63.0465	60.5229	58.1399	65.3084
	60.04	96.4701	87.3195	103.457	108.486	104.271	100.001	110.761	104.205	100.162	96.6892	92.7603	100.915	82.2722	81.8358	79.6399	79.7592	74.8758	79.6766	77.7467	68.2648	63.5132	60.872	58.2789	65.7351
