# Supplementary material for: Nicotinamide mononucleotide adenylyltransferase uses its NAD+ substrate-binding site to chaperone phosphorylated Tau
Source: eLife. 2020 Apr 6;9:e51859. doi: 10.7554/eLife.51859 (PMC7136026; doi:10.7554/eLife.51859)
Supplement: Figure 1—source data 2. [file elife-51859-fig1-data2.xlsx]

## Sheet: Fig.1D
Fig. 1D	Residue-specific chemical shift changes of pK19 titrated by mN3
	chemical shift changes
residue	15N-pK19:mN3 = 100:200μM
244	0
245	0.011669
246	0.00492286
247	0
248	0
249	0
250	0
251	0
252	0
253	0
254	0
255	0
256	0
257	0
258	0.00133
259	0.00351864
260	0
261	0
262	0.0382983
263	0
264	0
265	0
266	0
267	0.0140406
268	0.0379586
269	0.00414281
270	0
271	0
272	0
273	0
274	0.00474256
306	0
307	0
308	0.00163
309	0.00420088
310	0.00281976
311	0.00222154
312	0
313	0
314	0.0081772
315	0
316	0
317	0
318	0.00188985
319	0.00635469
320	0
321	0
322	0
323	0
324	0.0244334
325	0.00249539
326	0
327	0
328	0
329	0.00423677
330	0
331	0
332	0
333	0
334	0
335	0
336	0.00424483
337	0
338	0
339	0
340	0.00157539
341	0
342	0
343	0.00446792
344	0
345	0.00216963
346	0
347	0
348	0
349	0.00326609
350	0
351	0.010289
352	0.0331495
353	0
354	0
355	0
356	0.0358761
357	0.0153443
358	0
359	0
360	0
361	0.00232154
362	0
363	0.0359777
364	0
365	0
366	0
367	0
368	0.00465
369	0.00412836
371	0.00541107
372	0.00271499

## Sheet: Fig.1E
Fig. 1E	Residue-specific intensity changes of pK19 and K19 titrated by mN3
	intensity changes			intensity changes
residue	15N-pK19:mN3 = 100:200μM		residue	15N-K19:mN3 = 100:200μM
245	0.611516		245	0.688925
246	0.765163		246	0.906131
248	0.860334		248	0.970054
250	0.991552		250	0.964377
252	0.7695		252	0.90296
253	0.722329		253	0.923059
254	0.727119		254	0.877359
255	0.569449		255	0.664179
256	0.768107		256	0.981633
257	0.722639		257	0.846078
258	0.6497		258	0.822093
259	0.564898		259	0.696943
260	0.529485		260	0.806422
261	0.538054		261	0.710998
262	0.706187		262	0.821116
263	0.701268		263	0.751669
264	0.602151		264	0.870064
265	0.707004		265	0.777662
266	0.760672		266	0.966031
267	0.769315		267	0.844007
268	0.701656		268	0.972737
269	0.268906		269	0.805251
271	0.563219		274	0.844007
272	0.563219		306	0.901562
273	0.666001		307	0.96643
274	0.643584		308	0.901103
306	0.822027		309	0.929509
307	0.769055		310	0.918912
308	0.78586		311	0.853654
309	0.773144		313	0.967813
310	0.743694		314	0.907585
311	0.732092		315	0.863759
313	0.669447		316	0.864811
314	0.869278		317	0.826687
315	0.769998		318	0.858759
316	0.733044		319	0.80055
317	0.735583		320	1.27984
318	0.741976		321	0.774591
319	0.135042		324	0.707351
320	0.585928		325	0.84601
321	0.545318		326	0.849883
322	0.528663		327	1.07107
323	0.560723		328	0.869623
324	0.66274		329	0.763304
325	0.685112		331	1.0173
326	0.699531		333	0.792046
327	0.617361		335	0.765003
328	0.743327		336	0.891909
329	-0.0419994		337	0.956877
331	0.904653		338	0.749607
333	0.563219		339	0.930278
334	0.563219		340	0.916424
335	0.666001		341	0.767188
336	0.728657		342	0.803614
337	0.826912		343	1.03155
338	0.715078		344	0.998035
339	0.853509		345	0.857604
340	0.757978		346	0.73423
341	0.633805		347	0.715847
342	0.679128		348	0.728667
343	0.766015		349	0.785968
344	0.782535		350	0.765913
345	0.617244		351	0.678289
346	0.694181		352	0.724608
347	0.791337		353	0.696943
348	0.738066		354	0.768203
349	0.573234		355	0.710998
350	0.326482		356	0.57825
351	0.326898		357	0.696943
352	0.262504		358	0.749203
353	0.640973		359	1.10856
354	0.529485		360	0.735094
355	0.538054		361	0.763885
356	0.0876298		362	0.98475
357	0.136929		363	0.827022
358	0.100846		368	0.640556
359	0.232692		369	0.783292
360	0.199269		370	0.891196
361	0.642965		371	0.836245
363	0.304526		372	1.01827
365	0.563219
366	0.563219
367	0.666001
368	0.570182
369	0.607986
371	0.744955
372	0.794246
