# Supplementary material for: Nicotinamide mononucleotide adenylyltransferase uses its NAD+ substrate-binding site to chaperone phosphorylated Tau
Source: eLife. 2020 Apr 6;9:e51859. doi: 10.7554/eLife.51859 (PMC7136026; doi:10.7554/eLife.51859)
Supplement: Figure 1—source data 3. [file elife-51859-fig1-data3.xlsx]

## Sheet: Fig.1F
Fig. 1F	The association and dissociation response of pK19/ K19 to mN3
Binding affinity of pK19 with mN3							Binding affinity of K19 with mN3
Tme (s)	400uM	200uM	100uM	50uM	25uM		Tme (s)	400uM	200uM	100uM	50uM	25uM
0	0.116656	0.0341978	0.00042222	-0.0111831	-0.0140688		0	0.0169869	0.00624717	-0.00624034	-0.00105587	0.0121745
0.2	0.138748	0.048364	0.00901255	-0.00634597	-0.0113293		0.2	0.0207468	0.00791934	-0.00584492	-0.00020848	0.0158234
0.4	0.163002	0.063771	0.018398	-0.00152486	-0.00907937		0.4	0.0252363	0.00980623	-0.00498888	0.0004263	0.0201802
0.6	0.18869	0.0804083	0.0284872	0.00340754	-0.00641764		0.6	0.0302057	0.0118986	-0.00403427	0.0016359	0.0250072
0.8	0.215789	0.0979717	0.0388974	0.0084111	-0.0036569		0.8	0.034917	0.0139559	-0.00332802	0.00214472	0.0297517
1	0.243147	0.116093	0.0499636	0.0140282	-0.00088958		1	0.0393974	0.0159382	-0.00237044	0.0023482	0.0341124
1.2	0.269408	0.133645	0.0605012	0.0189822	0.00107188		1.2	0.0438976	0.0180657	-0.00123441	0.00323965	0.039082
1.4	0.294736	0.150772	0.0706827	0.02359	0.00294003		1.4	0.0482529	0.0197782	-0.0006336	0.0035112	0.0434011
1.6	0.317687	0.166872	0.0801947	0.0279087	0.00490205		1.6	0.052407	0.0219391	0.00021365	0.00399453	0.0478136
1.8	0.33778	0.181265	0.0885991	0.0320026	0.00667617		1.8	0.0561345	0.0235761	0.00121275	0.00417263	0.0517364
2	0.353767	0.192763	0.0955857	0.0356371	0.00779057		2	0.0587853	0.025069	0.00166371	0.00416169	0.0546966
2.2	0.36508	0.201173	0.101136	0.038287	0.00861343		2.2	0.0606216	0.0261743	0.00229757	0.00421474	0.0572239
2.4	0.375317	0.209232	0.106091	0.040839	0.0092819		2.4	0.0630139	0.027458	0.0026597	0.00414324	0.0595969
2.6	0.383755	0.216556	0.110775	0.0430584	0.00975817		2.6	0.0648688	0.0281121	0.00249541	0.00355508	0.0615242
2.8	0.392097	0.223816	0.115552	0.0452926	0.0109287		2.8	0.0672913	0.0294081	0.00303986	0.004043	0.063825
3	0.399657	0.230104	0.119802	0.0475023	0.0117856		3	0.0692843	0.0305406	0.00376378	0.00379853	0.0661786
3.2	0.406538	0.235439	0.123054	0.0496041	0.0122691		3.2	0.0724217	0.0321824	0.00447977	0.00424123	0.0688551
3.4	0.413313	0.240638	0.126727	0.0515032	0.0130783		3.4	0.0746238	0.0330431	0.00476127	0.0045347	0.0710314
3.6	0.419782	0.246252	0.130563	0.0541153	0.0147069		3.6	0.0767914	0.0341516	0.00491696	0.00428079	0.0726779
3.8	0.425636	0.251318	0.134073	0.056714	0.015706		3.8	0.0792928	0.0347229	0.00487265	0.00463391	0.0744829
4	0.431657	0.255328	0.137779	0.0588156	0.0165165		4	0.081715	0.0361271	0.00578993	0.00527406	0.076868
4.2	0.436358	0.258489	0.140756	0.0605757	0.0174675		4.2	0.0837998	0.0363923	0.00562661	0.00510178	0.0785471
4.4	0.440803	0.261543	0.143702	0.0618532	0.0179446		4.4	0.0868012	0.0377198	0.00644903	0.00552407	0.0807348
4.6	0.445062	0.26505	0.146555	0.0634315	0.019037		4.6	0.0889047	0.0383947	0.00654522	0.00591359	0.0826253
4.8	0.449597	0.268555	0.149068	0.0651285	0.02011		4.8	0.0903696	0.0388265	0.00641104	0.00537991	0.0838147
5	0.453373	0.271772	0.151819	0.0670461	0.0211168		5	0.0921634	0.0392764	0.00676108	0.0054081	0.0851168
5.2	0.456872	0.274031	0.153317	0.0677227	0.0210522		5.2	0.094101	0.0403652	0.00720648	0.00572764	0.0869919
5.4	0.460853	0.277059	0.155081	0.0690053	0.0215459		5.4	0.0961312	0.0410848	0.00729135	0.00553587	0.0881181
5.6	0.464435	0.280058	0.157132	0.0707051	0.0227064		5.6	0.0977583	0.0419857	0.00773901	0.00599199	0.0896069
5.8	0.468394	0.283036	0.158884	0.0722021	0.0234846		5.8	0.0992853	0.0426978	0.00786314	0.00594648	0.0906401
6	0.471907	0.285055	0.160429	0.0732643	0.0233502		6	0.100608	0.043226	0.00793893	0.00612083	0.0915922
6.2	0.475827	0.288286	0.162671	0.0751321	0.0242459		6.2	0.101744	0.0437275	0.00822466	0.00614965	0.0927244
6.4	0.478753	0.290565	0.163377	0.0754015	0.0239391		6.4	0.102677	0.0438507	0.00801786	0.00585581	0.0930239
6.6	0.481515	0.292285	0.164422	0.0761481	0.0240637		6.6	0.103867	0.0442906	0.00824145	0.00644437	0.0938587
6.8	0.484668	0.294634	0.165775	0.0768701	0.0239486		6.8	0.105152	0.0449488	0.00808513	0.00657768	0.0943509
7	0.487651	0.29698	0.166595	0.0779502	0.0245084		7	0.105906	0.0452335	0.00774116	0.0063348	0.0949467
7.2	0.490049	0.298649	0.167515	0.0782462	0.0241563		7.2	0.107639	0.0458686	0.00746947	0.00676564	0.09589
7.4	0.49305	0.300686	0.169293	0.0789292	0.0245395		7.4	0.1089	0.0464775	0.00740984	0.00706901	0.0967378
7.6	0.49537	0.302738	0.17092	0.0798165	0.0245678		7.6	0.11053	0.0469664	0.00719914	0.007044	0.0970099
7.8	0.497991	0.304574	0.172383	0.0804521	0.0244258		7.8	0.112446	0.0476097	0.0075104	0.00783159	0.0982103
8	0.500613	0.305672	0.173138	0.0807914	0.023977		8	0.113367	0.0482254	0.00775373	0.00699065	0.0989338
8.2	0.502079	0.307272	0.17428	0.0810873	0.0240169		8.2	0.11473	0.0494336	0.008177	0.00715194	0.0996362
8.4	0.504351	0.309249	0.175847	0.0813168	0.0241025		8.4	0.116747	0.0506458	0.00872208	0.00752856	0.100761
8.6	0.506991	0.311575	0.177131	0.0819536	0.0243565		8.6	0.11732	0.0508687	0.00864841	0.00699106	0.101266
8.8	0.509286	0.31336	0.177981	0.0824196	0.0246298		8.8	0.118535	0.0512956	0.00936431	0.00676483	0.1022
9	0.511689	0.314875	0.179224	0.0828072	0.0250772		9	0.119839	0.0515253	0.0100207	0.00652458	0.10305
9.2	0.513843	0.315878	0.179853	0.0826853	0.0245541		9.2	0.120666	0.0520032	0.0102202	0.00602933	0.10352
9.4	0.516172	0.317869	0.180933	0.0833979	0.0251123		9.4	0.122031	0.0524082	0.0103687	0.00591864	0.104293
9.6	0.518307	0.319182	0.182089	0.083543	0.0256055		9.6	0.122847	0.0525484	0.0102115	0.00587407	0.104918
9.8	0.520826	0.320444	0.182882	0.083592	0.0256138		9.8	0.123776	0.0532268	0.010452	0.00583451	0.105808
10	0.523125	0.321613	0.183659	0.0841598	0.0256292		10	0.124404	0.0533966	0.0105804	0.00544838	0.106347
10.2	0.525812	0.323833	0.184724	0.085588	0.0267777		10.2	0.125102	0.0539159	0.0103244	0.00525613	0.106935
10.4	0.527712	0.325043	0.185009	0.0853408	0.026695		10.4	0.125893	0.0544298	0.0101542	0.00507255	0.107538
10.6	0.529884	0.326321	0.185526	0.0861251	0.0267644		10.6	0.126945	0.0551615	0.0104415	0.00520702	0.108442
10.8	0.531988	0.328364	0.186678	0.0871497	0.027298		10.8	0.127728	0.0554613	0.0101933	0.00489068	0.109119
11	0.534495	0.329973	0.187574	0.0880998	0.0282467		11	0.128408	0.0556988	0.00990187	0.00436897	0.109659
11.2	0.53628	0.331234	0.1883	0.0884478	0.0280808		11.2	0.129818	0.0562553	0.00974039	0.00451618	0.110585
11.4	0.538419	0.332797	0.189224	0.0890741	0.0284693		11.4	0.131055	0.0565914	0.0100862	0.00446005	0.110881
11.6	0.540282	0.334446	0.18971	0.0900643	0.0286872		11.6	0.1326	0.0578166	0.010482	0.00466209	0.111736
11.8	0.54242	0.336403	0.1903	0.0907816	0.0288086		11.8	0.134023	0.0587353	0.0109078	0.00470961	0.11297
12	0.544451	0.338138	0.191087	0.0915711	0.0292257		12	0.135417	0.0599938	0.011625	0.00482885	0.113728
12.2	0.546471	0.340127	0.19247	0.0921796	0.0297049		12.2	0.136666	0.0611657	0.0125525	0.00570368	0.114644
12.4	0.548666	0.341828	0.193097	0.0928839	0.0298698		12.4	0.137788	0.0611295	0.0132184	0.00581455	0.115409
12.6	0.550704	0.343475	0.193927	0.0936287	0.0298915		12.6	0.138273	0.060688	0.0134301	0.00572176	0.115776
12.8	0.552822	0.345119	0.1948	0.0944946	0.030427		12.8	0.139118	0.0604539	0.0138976	0.006122	0.116288
13	0.554497	0.346102	0.195662	0.0948521	0.0302943		13	0.139593	0.0603024	0.0139168	0.00573196	0.1167
13.2	0.556531	0.347324	0.196534	0.0952364	0.0302439		13.2	0.140217	0.0605233	0.013935	0.00598727	0.116867
13.4	0.558752	0.348576	0.197238	0.0957378	0.0303458		13.4	0.141392	0.0610568	0.0141112	0.00616795	0.117526
13.6	0.560457	0.348902	0.19752	0.0953467	0.0294522		13.6	0.141637	0.0611281	0.0139702	0.00593032	0.117429
13.8	0.562637	0.349795	0.197803	0.0953995	0.028576		13.8	0.14203	0.0614275	0.014173	0.00616393	0.117742
14	0.564119	0.351015	0.197983	0.0955609	0.0283335		14	0.142471	0.0614105	0.0138343	0.00560423	0.117642
14.2	0.56565	0.352132	0.198192	0.0955727	0.0280197		14.2	0.143266	0.0616718	0.0138116	0.00543549	0.118025
14.4	0.567235	0.353137	0.198784	0.0954073	0.0275236		14.4	0.143482	0.0618826	0.0138155	0.00483225	0.118206
14.6	0.569601	0.354432	0.199708	0.0960608	0.0276321		14.6	0.143751	0.0622815	0.0140851	0.00446311	0.118611
14.8	0.571969	0.355976	0.200932	0.0967454	0.0282384		14.8	0.143325	0.0622835	0.0133996	0.00366913	0.118397
15	0.574334	0.357357	0.201668	0.0970818	0.0288316		15	0.143561	0.062218	0.0133045	0.00338479	0.118454
15.2	0.576123	0.358785	0.20254	0.0976193	0.0291456		15.2	0.144094	0.0628915	0.0132185	0.00348068	0.118876
15.4	0.577894	0.360117	0.203366	0.0983527	0.0292647		15.4	0.144762	0.0635385	0.0133735	0.00322757	0.119294
15.6	0.579984	0.361668	0.204674	0.0995321	0.0298615		15.6	0.145721	0.0646237	0.013336	0.00357092	0.120119
15.8	0.58205	0.363152	0.205383	0.0997048	0.0301825		15.8	0.146369	0.0653495	0.0136336	0.00378725	0.120749
16	0.584097	0.364623	0.206438	0.100254	0.0307583		16	0.1475	0.0664268	0.0144873	0.00424665	0.121542
16.2	0.585739	0.365672	0.207135	0.100595	0.0306002		16.2	0.147835	0.0662148	0.0140197	0.00398802	0.122098
16.4	0.586883	0.366666	0.207571	0.101125	0.0304351		16.4	0.148895	0.0661958	0.0143626	0.0041376	0.123227
16.6	0.588401	0.367894	0.20879	0.101537	0.0309291		16.6	0.149557	0.0658394	0.0137774	0.00360441	0.123191
16.8	0.590126	0.368939	0.209577	0.101963	0.0315071		16.8	0.150331	0.0662876	0.0138744	0.00370257	0.123749
17	0.591772	0.370026	0.210164	0.102063	0.031274		17	0.151192	0.0666128	0.0138779	0.00300813	0.124472
17.2	0.594081	0.371277	0.211098	0.102637	0.0321064		17.2	0.15239	0.0669237	0.0139488	0.00322488	0.12481
17.4	0.596058	0.372463	0.211706	0.10336	0.0321197		17.4	0.153344	0.0674361	0.0137655	0.00275541	0.125256
17.6	0.597311	0.37307	0.211998	0.103558	0.0318219		17.6	0.15468	0.067988	0.0139294	0.002769	0.125571
17.8	0.599344	0.374805	0.2127	0.10432	0.0320112		17.8	0.155859	0.0681534	0.0140317	0.00315065	0.126096
18	0.600838	0.375758	0.213166	0.104841	0.0324288		18	0.156537	0.0682205	0.0139358	0.00261104	0.126307
18.2	0.602641	0.376432	0.213964	0.104972	0.0325885		18.2	0.157575	0.0689943	0.0145044	0.00283409	0.127004
18.4	0.604354	0.37734	0.214752	0.105173	0.0330381		18.4	0.158072	0.0693056	0.0145202	0.0024932	0.12702
18.6	0.606701	0.379025	0.216029	0.105809	0.0341081		18.6	0.158224	0.0698294	0.0149015	0.00265323	0.12755
18.8	0.608532	0.380681	0.216786	0.106444	0.0345908		18.8	0.158152	0.0696859	0.0145655	0.00215144	0.12755
19	0.610289	0.381874	0.217699	0.106565	0.0348341		19	0.159053	0.0699469	0.0151153	0.00265836	0.128495
19.2	0.611995	0.382647	0.217922	0.106772	0.0345597		19.2	0.159082	0.0701907	0.014808	0.00248108	0.128486
19.4	0.613412	0.383486	0.217869	0.106596	0.0337843		19.4	0.159197	0.0704886	0.0146131	0.00268682	0.128818
19.6	0.614999	0.384393	0.217763	0.106682	0.0332135		19.6	0.159465	0.0709128	0.0148667	0.00271676	0.129055
19.8	0.616466	0.38543	0.217736	0.105959	0.0328079		19.8	0.159689	0.07098	0.0151132	0.00230701	0.129138
20	0.61763	0.386538	0.217697	0.106173	0.0323636		20	0.159536	0.0706968	0.0148329	0.00172702	0.129043
20.2	0.618742	0.387183	0.217812	0.105913	0.0316189		20.2	0.159712	0.0705048	0.0143749	0.00120771	0.129319
20.4	0.619393	0.387719	0.217714	0.105486	0.0312246		20.4	0.160272	0.0709317	0.0149232	0.00122284	0.130068
20.6	0.620955	0.388605	0.218141	0.105563	0.0317273		20.6	0.16008	0.0702075	0.0143732	0.00035411	0.129344
20.8	0.622128	0.389034	0.218007	0.105067	0.0314403		20.8	0.160561	0.0700432	0.0140651	0.00066981	0.130018
21	0.624193	0.390358	0.218214	0.105534	0.0315197		21	0.160681	0.0700556	0.0139622	0.00016891	0.13002
21.2	0.625443	0.390553	0.218452	0.105963	0.0317152		21.2	0.161267	0.0703837	0.0139086	0.00024612	0.13051
21.4	0.627332	0.391773	0.219321	0.106857	0.0316286		21.4	0.161523	0.0702176	0.0131504	-4.623e-05	0.130489
21.6	0.628252	0.392588	0.219625	0.107341	0.0315785		21.6	0.16284	0.0705082	0.013455	0.00032272	0.130822
21.8	0.630044	0.393655	0.220032	0.107843	0.0315683		21.8	0.162929	0.0704803	0.0133409	0.00055202	0.131272
22	0.631297	0.393949	0.220567	0.108152	0.0317585		22	0.163334	0.0711338	0.0135501	0.00086166	0.131817
22.2	0.632682	0.394749	0.221372	0.108438	0.0320735		22.2	0.163909	0.071833	0.0139871	0.00122045	0.132407
22.4	0.634338	0.396359	0.222248	0.109127	0.0326059		22.4	0.163951	0.0715628	0.0136622	0.00080028	0.132048
22.6	0.636131	0.39791	0.223324	0.109758	0.033078		22.6	0.16408	0.0714802	0.0138141	0.00083692	0.132467
22.8	0.637632	0.399356	0.224305	0.110199	0.0333067		22.8	0.164501	0.0711418	0.0137418	0.00041472	0.132969
23	0.638865	0.400125	0.224989	0.10977	0.0332092		23	0.165218	0.0714121	0.0137675	0.00060233	0.133929
23.2	0.640287	0.401427	0.225738	0.110268	0.0331963		23.2	0.165304	0.0712694	0.0134997	0.00084516	0.133929
23.4	0.641227	0.402667	0.226293	0.110497	0.0330387		23.4	0.166048	0.0719231	0.013778	0.00114267	0.134647
23.6	0.642496	0.403904	0.226881	0.111273	0.0331619		23.6	0.166581	0.0720194	0.014043	0.00078667	0.134919
23.8	0.644304	0.405511	0.227825	0.111835	0.033593		23.8	0.167223	0.0723147	0.014192	0.00069237	0.135304
24	0.646111	0.406624	0.228364	0.112381	0.0339426		24	0.167693	0.0728886	0.0146964	0.00026297	0.135984
24.2	0.64739	0.407452	0.228897	0.112188	0.0337227		24.2	0.16875	0.0735274	0.0148725	0.00038593	0.136746
24.4	0.648618	0.408134	0.229177	0.112172	0.0338424		24.4	0.169055	0.0734779	0.0147184	0.00027541	0.136823
24.6	0.650409	0.409162	0.229846	0.112654	0.0339592		24.6	0.169246	0.0728442	0.0144955	-3.927e-05	0.136723
24.8	0.651323	0.409427	0.229502	0.111742	0.0331922		24.8	0.169729	0.0731242	0.0146498	0.0002701	0.137294
25	0.653196	0.410572	0.229798	0.1124	0.0330144		25	0.169414	0.0734887	0.0145246	-0.00059047	0.136601
25.2	0.654068	0.410659	0.229811	0.111879	0.0323497		25.2	0.170141	0.0736887	0.0143956	-0.00053807	0.136954
25.4	0.655262	0.411263	0.229793	0.111814	0.0318505		25.4	0.170416	0.0731887	0.0138986	-0.00075889	0.136791
25.6	0.656532	0.412052	0.229872	0.112071	0.0320347		25.6	0.170626	0.0733686	0.0138155	-0.00079457	0.137177
25.8	0.657838	0.413217	0.230368	0.112336	0.0318978		25.8	0.17056	0.073078	0.0133354	-0.0007181	0.137532
26	0.659329	0.414131	0.230871	0.112653	0.0320671		26	0.170865	0.0732876	0.0129839	-0.00066594	0.13753
26.2	0.660914	0.415271	0.231334	0.112926	0.0323971		26.2	0.170339	0.0729526	0.0126841	-0.00144296	0.137401
26.4	0.661802	0.416254	0.23153	0.113139	0.0322882		26.4	0.170263	0.0723559	0.012056	-0.00204183	0.136672
26.6	0.662861	0.416675	0.232142	0.113291	0.0326659		26.6	0.170198	0.0721225	0.012243	-0.00234225	0.136861
26.8	0.66436	0.417896	0.232913	0.113262	0.032918		26.8	0.170716	0.0723763	0.0125216	-0.00249087	0.137242
27	0.664977	0.418738	0.23347	0.113151	0.0326722		27	0.171334	0.072613	0.012555	-0.00226954	0.137497
27.2	0.666174	0.419436	0.234055	0.11374	0.0325279		27.2	0.171628	0.0725308	0.0124512	-0.00242006	0.137144
27.4	0.667869	0.419926	0.234501	0.114347	0.0325706		27.4	0.172457	0.0734638	0.0127614	-0.00233668	0.137939
27.6	0.669319	0.420563	0.234832	0.114751	0.032593		27.6	0.173017	0.07417	0.0128454	-0.00229272	0.138197
27.8	0.67107	0.421552	0.235425	0.115248	0.0325216		27.8	0.173579	0.0744566	0.0132434	-0.00227765	0.138612
28	0.672455	0.422047	0.235708	0.115389	0.0323465		28	0.174163	0.0747355	0.0137376	-0.00254396	0.139013
28.2	0.67373	0.422999	0.23638	0.11562	0.032214		28.2	0.174541	0.0753697	0.0138995	-0.00226375	0.139236
28.4	0.675723	0.423947	0.237219	0.116278	0.0322744		28.4	0.174882	0.0753502	0.0137262	-0.00237074	0.139461
28.6	0.677034	0.42494	0.237693	0.116542	0.0319939		28.6	0.175829	0.076102	0.0144382	-0.00142152	0.140438
28.8	0.677821	0.425312	0.23773	0.115942	0.0316064		28.8	0.17647	0.0766331	0.015238	-0.00105553	0.140925
29	0.679627	0.426435	0.238396	0.116007	0.0316287		29	0.176846	0.0768447	0.0152134	-0.00119416	0.141384
29.2	0.680625	0.427168	0.238606	0.11558	0.0315006		29.2	0.177778	0.0771951	0.015462	-0.00075276	0.142204
29.4	0.681621	0.427994	0.238862	0.115886	0.0312758		29.4	0.177962	0.0768512	0.0148688	-0.00123877	0.14249
29.6	0.683281	0.429196	0.239704	0.116383	0.0317112		29.6	0.177674	0.076713	0.0141379	-0.00182791	0.142708
29.8	0.684094	0.430643	0.240279	0.116901	0.0319996		29.8	0.17828	0.0769205	0.0141812	-0.00140462	0.142959
30	0.685542	0.431273	0.240497	0.117401	0.0322219		30	0.178758	0.0773322	0.0143861	-0.00121733	0.143266
30.2	0.686681	0.431846	0.240777	0.117936	0.0326961		30.2	0.178171	0.0767412	0.013963	-0.00209572	0.14285
30.4	0.687729	0.432995	0.241085	0.118657	0.0328284		30.4	0.178106	0.076501	0.0136653	-0.00253313	0.142368
30.6	0.689245	0.433882	0.24172	0.119077	0.0335255		30.6	0.178082	0.0763881	0.0137709	-0.00299167	0.142554
30.8	0.690868	0.435158	0.242286	0.119525	0.0335556		30.8	0.17872	0.0767399	0.0137583	-0.00359968	0.142457
31	0.691649	0.435654	0.242681	0.119992	0.0334198		31	0.178973	0.0771071	0.0136465	-0.0040761	0.142036
31.2	0.693114	0.435985	0.242969	0.120341	0.0330972		31.2	0.179296	0.0772328	0.0132187	-0.00472172	0.1417
31.4	0.694715	0.436367	0.24296	0.120488	0.0330305		31.4	0.179688	0.0778355	0.0130292	-0.00481068	0.142466
31.6	0.695523	0.437346	0.24353	0.120559	0.0331642		31.6	0.179907	0.0782172	0.0130941	-0.00504159	0.142423
31.8	0.696639	0.43831	0.244094	0.120813	0.0331388		31.8	0.179785	0.077807	0.0129208	-0.00546282	0.142558
32	0.698003	0.43892	0.244692	0.121058	0.0334288		32	0.17979	0.0783441	0.0129164	-0.00604194	0.143019
32.2	0.699329	0.44005	0.245667	0.121251	0.0336517		32.2	0.18022	0.0786215	0.0126459	-0.00615191	0.143596
32.4	0.700446	0.440721	0.245583	0.121162	0.0336964		32.4	0.180698	0.0783382	0.0121187	-0.00597049	0.143878
32.6	0.700541	0.441159	0.245185	0.120669	0.0329089		32.6	0.180631	0.0781143	0.0125238	-0.00585908	0.144321
32.8	0.70184	0.442241	0.245923	0.120577	0.0331776		32.8	0.180212	0.077648	0.0124753	-0.00638963	0.144281
33	0.703849	0.443871	0.246608	0.120852	0.0334202		33	0.180571	0.0778535	0.0124	-0.0064869	0.144517
33.2	0.70494	0.444709	0.247113	0.121058	0.0336872		33.2	0.180786	0.077754	0.0122115	-0.00684156	0.144469
33.4	0.705921	0.445133	0.247456	0.121281	0.0332603		33.4	0.1806	0.0769298	0.0114789	-0.00736035	0.144597
33.6	0.707524	0.445964	0.247602	0.121442	0.0335866		33.6	0.180637	0.0763991	0.011131	-0.00697706	0.144255
33.8	0.708717	0.447425	0.248317	0.122203	0.0340225		33.8	0.18132	0.0761049	0.0112085	-0.00638467	0.144417
34	0.710253	0.448489	0.248958	0.122794	0.0339767		34	0.181392	0.0757311	0.0115294	-0.00613709	0.144681
34.2	0.71153	0.449562	0.249569	0.12335	0.0341022		34.2	0.18083	0.075184	0.0110884	-0.00681172	0.144209
34.4	0.713033	0.451274	0.250163	0.123946	0.0339774		34.4	0.181486	0.0750311	0.0114782	-0.00698626	0.144802
34.6	0.714479	0.452067	0.250636	0.124116	0.0340138		34.6	0.182064	0.0750069	0.0114409	-0.00705047	0.145184
34.8	0.715559	0.452853	0.251611	0.124506	0.0340585		34.8	0.182878	0.0756003	0.0116457	-0.00709835	0.145388
35	0.716242	0.453321	0.251485	0.124262	0.0334171		35	0.183412	0.0763263	0.0116225	-0.00698528	0.145495
35.2	0.718081	0.453751	0.251831	0.124322	0.0335557		35.2	0.184049	0.0763466	0.0114669	-0.00677148	0.145414
35.4	0.719588	0.454291	0.251887	0.124253	0.0335835		35.4	0.184682	0.0769144	0.0113048	-0.00670126	0.146112
35.6	0.720805	0.455514	0.25275	0.124178	0.0336266		35.6	0.184643	0.0772616	0.0111885	-0.00677597	0.146049
35.8	0.721147	0.456209	0.252892	0.124156	0.0330505		35.8	0.184467	0.0769786	0.0108515	-0.00721137	0.146208
36	0.722575	0.457252	0.253402	0.124628	0.0331847		36	0.185106	0.0775024	0.0110018	-0.00753578	0.146699
36.2	0.723466	0.458171	0.253583	0.125043	0.0329583		36.2	0.185882	0.0778156	0.0107962	-0.00761248	0.146952
36.4	0.72424	0.458361	0.253202	0.125113	0.0327429		36.4	0.186007	0.0779284	0.0108354	-0.00768811	0.147111
36.6	0.725515	0.459094	0.253618	0.125753	0.0324427		36.6	0.185915	0.077772	0.0106516	-0.00822527	0.147219
36.8	0.727764	0.460311	0.254661	0.126748	0.0333652		36.8	0.186525	0.0780898	0.0107147	-0.00804	0.147445
37	0.729417	0.461078	0.255124	0.127242	0.0333736		37	0.187707	0.0787903	0.011243	-0.00800784	0.147822
37.2	0.730298	0.461109	0.255438	0.12726	0.0333205		37.2	0.1876	0.0784185	0.0109535	-0.00819378	0.148361
37.4	0.73151	0.461618	0.255687	0.127353	0.0330893		37.4	0.187698	0.0780062	0.0106259	-0.00830374	0.148297
37.6	0.733191	0.462559	0.256079	0.127647	0.0331497		37.6	0.187832	0.0775875	0.0104803	-0.00839355	0.148137
37.8	0.734457	0.463634	0.256847	0.128093	0.0332625		37.8	0.187634	0.0776745	0.0105616	-0.00866474	0.148465
38	0.735301	0.464669	0.256804	0.128243	0.0332033		38	0.187226	0.0777356	0.0106564	-0.00893193	0.148769
38.2	0.736934	0.465618	0.257163	0.128474	0.0332463		38.2	0.187241	0.0776367	0.0103012	-0.00982637	0.148965
38.4	0.737907	0.466497	0.257612	0.128454	0.0334952		38.4	0.187934	0.0779749	0.0110269	-0.00928928	0.149818
38.6	0.73889	0.466883	0.257974	0.128361	0.0338654		38.6	0.187997	0.0783398	0.0109799	-0.0087195	0.150092
38.8	0.739989	0.467433	0.258864	0.128523	0.0341954		38.8	0.188248	0.0785913	0.0110457	-0.00868154	0.150353
39	0.741409	0.467883	0.258894	0.128728	0.0342438		39	0.18833	0.0788132	0.0113052	-0.00838941	0.150299
39.2	0.743328	0.468861	0.259789	0.129166	0.0347553		39.2	0.188179	0.0785173	0.0109319	-0.00854177	0.149657
39.4	0.744241	0.469844	0.260183	0.129157	0.0344792		39.4	0.188958	0.0789901	0.0111744	-0.0079996	0.150505
39.6	0.745475	0.471356	0.260574	0.128822	0.0344058		39.6	0.188546	0.0789654	0.0107761	-0.00862971	0.15028
39.8	0.745755	0.471872	0.260688	0.128825	0.0340915		39.8	0.188723	0.0784383	0.0103535	-0.00937281	0.150212
40	0.74714	0.472347	0.260923	0.128958	0.0341252		40	0.189528	0.0786366	0.0101313	-0.00954281	0.150338
40.2	0.747964	0.473253	0.261163	0.129459	0.0340401		40.2	0.189327	0.0786465	0.00960461	-0.00974372	0.150258
40.4	0.748974	0.473938	0.261718	0.129835	0.0341274		40.4	0.18944	0.0787656	0.00951504	-0.00980063	0.150234
40.6	0.750056	0.474613	0.262212	0.129784	0.0337328		40.6	0.189745	0.0785077	0.00936529	-0.0100868	0.149534
40.8	0.751039	0.475355	0.262608	0.130296	0.0335563		40.8	0.19014	0.0788512	0.00953106	-0.0101654	0.149529
41	0.752101	0.475848	0.263062	0.130777	0.0333881		41	0.190701	0.0791341	0.010301	-0.0102889	0.150038
41.2	0.753139	0.476459	0.263617	0.131094	0.0335112		41.2	0.191131	0.078792	0.0101967	-0.0108682	0.150352
41.4	0.753827	0.476916	0.263961	0.131163	0.0334474		41.4	0.191457	0.0787105	0.0100186	-0.0117276	0.150072
41.6	0.755467	0.477962	0.264775	0.131972	0.0339225		41.6	0.191573	0.0788521	0.0100148	-0.0119997	0.150683
41.8	0.756371	0.478657	0.264786	0.132213	0.0337847		41.8	0.191313	0.0789745	0.00973575	-0.012399	0.150649
42	0.757247	0.479513	0.265001	0.132731	0.0337661		42	0.191367	0.0793172	0.0100302	-0.0124437	0.151272
42.2	0.758638	0.479977	0.266067	0.132684	0.033647		42.2	0.191487	0.079553	0.0101361	-0.0124167	0.151171
42.4	0.759502	0.480963	0.266729	0.132791	0.0340044		42.4	0.192152	0.0801313	0.0109172	-0.0115609	0.151883
42.6	0.761198	0.481828	0.267481	0.132748	0.0341497		42.6	0.19236	0.0798355	0.0106175	-0.0118561	0.151962
42.8	0.762439	0.482625	0.268259	0.132641	0.034071		42.8	0.192736	0.0801982	0.0106482	-0.0116168	0.152442
43	0.763449	0.483357	0.26818	0.13294	0.0339704		43	0.192794	0.080183	0.0106225	-0.0114767	0.152473
43.2	0.764873	0.484567	0.26868	0.132775	0.033798		43.2	0.193058	0.0802552	0.0102443	-0.0116934	0.152381
43.4	0.765768	0.485423	0.26865	0.132431	0.033778		43.4	0.193565	0.0808328	0.0107437	-0.0112286	0.153029
43.6	0.766555	0.486419	0.268431	0.131561	0.0333466		43.6	0.192963	0.0805924	0.0104542	-0.0114712	0.152946
43.8	0.767068	0.486714	0.267948	0.1313	0.0325834		43.8	0.192918	0.080316	0.0101969	-0.0113387	0.153347
44	0.76805	0.488018	0.268257	0.131863	0.0323719		44	0.192668	0.0806421	0.00973959	-0.0110689	0.153281
44.2	0.768911	0.489321	0.268676	0.132394	0.0323064		44.2	0.192388	0.0808318	0.00915251	-0.0110282	0.152831
44.4	0.769803	0.489707	0.268792	0.132307	0.032225		44.4	0.192293	0.0810038	0.00924284	-0.0110256	0.152578
44.6	0.770877	0.490245	0.268825	0.132487	0.0319086		44.6	0.192153	0.0804792	0.00885731	-0.011416	0.152048
44.8	0.771861	0.490638	0.268756	0.133178	0.0318674		44.8	0.192324	0.0807738	0.00918382	-0.0114905	0.152258
45	0.773094	0.491285	0.26881	0.133726	0.0318166		45	0.192317	0.0807804	0.00926017	-0.0118272	0.152689
45.2	0.773906	0.491463	0.268983	0.134085	0.0318055		45.2	0.192667	0.0806469	0.00923286	-0.0122164	0.152935
45.4	0.774738	0.491496	0.269455	0.134495	0.0319618		45.4	0.192745	0.0808568	0.00930591	-0.012157	0.153471
45.6	0.776832	0.49246	0.270138	0.135088	0.0325214		45.6	0.192861	0.0809237	0.00904104	-0.0123465	0.153638
45.8	0.777479	0.493088	0.270511	0.135041	0.0320209		45.8	0.192795	0.0803012	0.00894839	-0.0128358	0.153648
46	0.779202	0.494299	0.271638	0.135195	0.0327541		46	0.19329	0.0804671	0.00952737	-0.0130816	0.153916
46.2	0.780813	0.494971	0.272115	0.134718	0.0329301		46.2	0.193786	0.0803493	0.00939451	-0.0136877	0.153541
46.4	0.782517	0.496185	0.272846	0.134958	0.0335325		46.4	0.194585	0.0803949	0.00933622	-0.0143152	0.153817
46.6	0.783574	0.496352	0.273386	0.134634	0.0334113		46.6	0.19506	0.080116	0.00934354	-0.0148717	0.153882
46.8	0.784354	0.496434	0.273333	0.134589	0.0329163		46.8	0.195845	0.0803754	0.0093719	-0.0147977	0.154339
47	0.785466	0.496806	0.273263	0.134761	0.0326832		47	0.196095	0.0800497	0.00942819	-0.0155292	0.154031
47.2	0.786535	0.497297	0.273682	0.134576	0.0323167		47.2	0.196418	0.0800415	0.00923866	-0.0156529	0.153985
47.4	0.787513	0.49816	0.273939	0.134705	0.0318563		47.4	0.196825	0.0803566	0.00953825	-0.0150374	0.154481
47.6	0.788676	0.499047	0.274425	0.135199	0.0316582		47.6	0.197499	0.0803241	0.00962429	-0.0146993	0.154875
47.8	0.789779	0.500076	0.27515	0.136142	0.0316326		47.8	0.19809	0.0798844	0.00902625	-0.0150917	0.155064
48	0.791114	0.500962	0.276044	0.136881	0.0321536		48	0.198636	0.0801614	0.00845498	-0.0155105	0.154526
48.2	0.792137	0.501656	0.276619	0.137317	0.031968		48.2	0.198832	0.0801065	0.00836905	-0.0155663	0.154477
48.4	0.79308	0.501925	0.276395	0.137345	0.031848		48.4	0.198277	0.0797983	0.00842642	-0.0156331	0.154692
48.6	0.794075	0.502714	0.276898	0.137875	0.0315536		48.6	0.197756	0.0792277	0.00773914	-0.0161053	0.1542
48.8	0.794461	0.50274	0.276786	0.137865	0.0310762		48.8	0.197824	0.0794861	0.00798237	-0.0162358	0.154507
49	0.795516	0.503594	0.27722	0.138508	0.0314112		49	0.197723	0.0797568	0.00770685	-0.0164598	0.155075
49.2	0.7962	0.503957	0.27747	0.138801	0.0316352		49.2	0.198094	0.0797574	0.00778791	-0.0163351	0.155641
49.4	0.797413	0.505133	0.27823	0.138664	0.032252		49.4	0.198189	0.0797368	0.00770901	-0.0164291	0.155857
49.6	0.79868	0.506675	0.278703	0.138621	0.0327129		49.6	0.198466	0.0795502	0.0075933	-0.0167717	0.156036
49.8	0.799649	0.50797	0.279451	0.138699	0.0330955		49.8	0.198442	0.0794381	0.00794562	-0.0168864	0.156442
50	0.801429	0.509527	0.279676	0.138707	0.0337734		50	0.198406	0.0796566	0.00780727	-0.0178096	0.156116
50.2	0.802111	0.509655	0.279346	0.138411	0.0334559		50.2	0.198022	0.0798394	0.00769491	-0.0183207	0.156184
50.4	0.802747	0.510181	0.279627	0.138577	0.0334691		50.4	0.19844	0.08028	0.00756276	-0.0186391	0.156383
50.6	0.803673	0.51054	0.279821	0.138392	0.0334326		50.6	0.198598	0.080771	0.00764183	-0.0187871	0.156586
50.8	0.804131	0.51109	0.27996	0.13862	0.0332209		50.8	0.198762	0.0806409	0.0071915	-0.0191402	0.156445
51	0.80484	0.511636	0.280152	0.138833	0.0331008		51	0.198735	0.0804372	0.00719474	-0.0190597	0.156295
51.2	0.806257	0.512953	0.281019	0.139613	0.0332466		51.2	0.199128	0.0806341	0.00710486	-0.0185322	0.156359
51.4	0.807559	0.514181	0.281775	0.14009	0.0336083		51.4	0.199623	0.0811858	0.00723146	-0.0183099	0.156388
51.6	0.808525	0.515072	0.282592	0.140762	0.0340754		51.6	0.199962	0.0811632	0.00739788	-0.0183185	0.156381
51.8	0.809895	0.515974	0.283509	0.141408	0.0343494		51.8	0.200152	0.0810606	0.00763019	-0.018761	0.156189
52	0.811202	0.516893	0.283788	0.141687	0.0345351		52	0.200309	0.0815863	0.00796985	-0.0189004	0.156031
52.2	0.811888	0.51751	0.28422	0.141854	0.0340249		52.2	0.199711	0.081075	0.00780581	-0.0193114	0.156112
52.4	0.812326	0.517606	0.284044	0.141386	0.033368		52.4	0.199329	0.0808725	0.00726634	-0.019552	0.155795
52.6	0.812767	0.517893	0.284147	0.141321	0.0327444		52.6	0.198927	0.0801726	0.0065868	-0.0203248	0.155149
52.8	0.813683	0.51849	0.284225	0.141416	0.0326888		52.8	0.199443	0.0807225	0.00695967	-0.0202582	0.155969
53	0.814531	0.519234	0.284	0.141325	0.0328179		53	0.199271	0.0802047	0.00614043	-0.0206726	0.156255
53.2	0.814939	0.51928	0.283557	0.140986	0.0319449		53.2	0.198891	0.0797665	0.00551728	-0.021142	0.156193
53.4	0.816023	0.519792	0.283956	0.140467	0.0318881		53.4	0.198867	0.079513	0.00535436	-0.0215442	0.156339
53.6	0.816872	0.520201	0.28386	0.140507	0.031685		53.6	0.199129	0.0794191	0.005047	-0.0219967	0.156698
53.8	0.818048	0.520367	0.283589	0.140416	0.0313297		53.8	0.198607	0.0789993	0.0043632	-0.0222869	0.156596
54	0.81917	0.520931	0.283455	0.14032	0.0308133		54	0.198239	0.0784902	0.00387401	-0.0231591	0.156566
54.2	0.819881	0.52057	0.28325	0.140277	0.0304486		54.2	0.198397	0.0790822	0.00376458	-0.0232374	0.156904
54.4	0.820262	0.520954	0.283309	0.14027	0.0302172		54.4	0.198965	0.0792536	0.00371249	-0.0233386	0.156939
54.6	0.821536	0.521589	0.284244	0.140975	0.0304685		54.6	0.19928	0.0792811	0.00387683	-0.0229026	0.156835
54.8	0.821832	0.521444	0.284236	0.141019	0.0301394		54.8	0.199403	0.0785656	0.00363102	-0.0228335	0.157051
55	0.823608	0.52204	0.284939	0.141299	0.0303845		55	0.199673	0.0789159	0.00403838	-0.0221613	0.157207
55.2	0.825507	0.523476	0.286352	0.142392	0.0311554		55.2	0.200559	0.0797966	0.0046997	-0.0214707	0.157573
55.4	0.826167	0.523783	0.28654	0.142199	0.031094		55.4	0.201056	0.0796804	0.00469809	-0.0208984	0.157601
55.6	0.82726	0.524892	0.287117	0.142529	0.0313496		55.6	0.201425	0.080086	0.00545677	-0.0201451	0.158341
55.8	0.82893	0.525806	0.288179	0.142749	0.031801		55.8	0.201694	0.0804561	0.00599802	-0.0200219	0.158285
56	0.829174	0.526513	0.288289	0.142236	0.0315545		56	0.201758	0.0805497	0.0058902	-0.0200114	0.158493
56.2	0.830369	0.527213	0.288814	0.142192	0.0314766		56.2	0.201601	0.0802432	0.00487885	-0.0202915	0.158444
56.4	0.831196	0.527509	0.28925	0.142022	0.0310883		56.4	0.201588	0.0803457	0.00472636	-0.0200816	0.158432
56.6	0.832001	0.528063	0.289571	0.141697	0.0309477		56.6	0.201757	0.0806326	0.00456917	-0.0203547	0.158882
56.8	0.833365	0.529141	0.290178	0.141658	0.0311397		56.8	0.201671	0.0808989	0.00435264	-0.0201599	0.159144
57	0.833548	0.529651	0.290074	0.141339	0.0307285		57	0.201326	0.0807075	0.00374909	-0.0204781	0.158888
57.2	0.834219	0.529964	0.29047	0.141456	0.0304864		57.2	0.2012	0.080958	0.00378081	-0.0205266	0.158792
57.4	0.83516	0.530876	0.291188	0.141514	0.0306241		57.4	0.201214	0.0807779	0.00331069	-0.0206756	0.158785
57.6	0.836251	0.531424	0.291716	0.142184	0.0306898		57.6	0.200959	0.080085	0.00324416	-0.0210334	0.15896
57.8	0.837333	0.532156	0.291945	0.142689	0.0304474		57.8	0.200234	0.0794317	0.00269375	-0.0212844	0.158694
58	0.838099	0.532714	0.292282	0.142845	0.0302687		58	0.200126	0.079135	0.00273785	-0.0219548	0.158308
58.2	0.839183	0.533161	0.292118	0.143183	0.0301899		58.2	0.19997	0.0790211	0.00236943	-0.0224654	0.158022
58.4	0.839957	0.533601	0.291791	0.143262	0.0299586		58.4	0.19985	0.0782561	0.002259	-0.0228987	0.158035
58.6	0.841619	0.53482	0.292837	0.144497	0.0306675		58.6	0.199725	0.0779266	0.00186299	-0.0232064	0.158033
58.8	0.842913	0.535573	0.293187	0.144543	0.0311253		58.8	0.199505	0.0770756	0.00101341	-0.0239111	0.157642
59	0.844493	0.537109	0.2942	0.145165	0.0315592		59	0.199932	0.0776002	0.00101419	-0.024115	0.157594
59.2	0.845574	0.538651	0.294883	0.145936	0.0320369		59.2	0.200799	0.0779303	0.00113751	-0.0242472	0.157889
59.4	0.846463	0.539827	0.294627	0.145937	0.0319658		59.4	0.200759	0.0772512	0.0008448	-0.0247579	0.157964
59.6	0.848052	0.541095	0.295136	0.146223	0.0326467		59.6	0.200632	0.0779113	0.00104518	-0.0252673	0.158535
59.8	0.848876	0.541217	0.295494	0.145616	0.0322267		59.8	0.200488	0.0776002	0.0005458	-0.0261713	0.157863
60	0.849458	0.542005	0.295034	0.145398	0.0319243		60	0.200537	0.0778394	0.00025655	-0.0265476	0.157791
60.2	0.851184	0.543015	0.295377	0.145842	0.0321451		60.2	0.201172	0.078045	0.0004174	-0.0262807	0.157992
60.4	0.852443	0.543603	0.295839	0.145798	0.0323645		60.4	0.201342	0.0781533	0.00082526	-0.0265052	0.158188
60.6	0.853038	0.543889	0.295523	0.14513	0.0318496		60.6	0.20179	0.0785915	0.00131695	-0.0264153	0.158529
60.8	0.853842	0.544498	0.296001	0.145355	0.0316492		60.8	0.202337	0.0785697	0.00161049	-0.0262903	0.15841
61	0.854149	0.544709	0.295945	0.145137	0.0310028		61	0.202739	0.0792503	0.00230531	-0.0256873	0.15916
61.2	0.854478	0.544797	0.296383	0.145261	0.0308339		61.2	0.203053	0.0793012	0.00273633	-0.0251077	0.160042
61.4	0.855244	0.545607	0.296877	0.145409	0.0308551		61.4	0.203395	0.0796521	0.00306261	-0.0244991	0.160477
61.6	0.856516	0.545936	0.297774	0.145959	0.0308737		61.6	0.204013	0.0794017	0.00324332	-0.0239647	0.160863
61.8	0.857607	0.545894	0.297582	0.145931	0.0307894		61.8	0.204149	0.0795014	0.00308376	-0.0232852	0.161115
62	0.858821	0.54554	0.297791	0.145831	0.0308334		62	0.205058	0.0794632	0.00332095	-0.0228948	0.161598
62.2	0.860219	0.546216	0.298044	0.146374	0.0307191		62.2	0.205014	0.0797217	0.00313299	-0.0228336	0.161872
62.4	0.86096	0.546297	0.298466	0.146641	0.0306258		62.4	0.205298	0.07989	0.00267569	-0.0231674	0.162287
62.6	0.862255	0.547315	0.29989	0.147322	0.0313743		62.6	0.20514	0.0796738	0.00200887	-0.0235912	0.161928
62.8	0.86355	0.548214	0.300522	0.14748	0.031762		62.8	0.205698	0.079377	0.00161301	-0.0235585	0.161611
63	0.864096	0.549053	0.301137	0.147766	0.0317069		63	0.206177	0.0799169	0.00157117	-0.0238689	0.162
63.2	0.86558	0.550179	0.301963	0.148341	0.032557		63.2	0.206466	0.0798217	0.00104183	-0.0242578	0.162193
63.4	0.8663	0.550931	0.302136	0.148872	0.032918		63.4	0.206415	0.0795217	0.00097819	-0.0247566	0.162386
63.6	0.867471	0.551447	0.302647	0.148884	0.0329345		63.6	0.206317	0.0794842	0.00040226	-0.0254243	0.161838
63.8	0.867918	0.552077	0.302463	0.148731	0.0324561		63.8	0.206377	0.0794846	9.052e-05	-0.026027	0.161267
64	0.868991	0.553621	0.302506	0.149262	0.0327785		64	0.206378	0.0795299	-4.27e-06	-0.0262156	0.161459
64.2	0.87009	0.554484	0.302649	0.149272	0.03326		64.2	0.206831	0.0792872	0.00012231	-0.0267916	0.161329
64.4	0.870835	0.554917	0.302658	0.149096	0.0330158		64.4	0.206699	0.0792688	-0.00026198	-0.0278008	0.161643
64.6	0.871035	0.555045	0.302452	0.148454	0.0320595		64.6	0.206713	0.079416	-0.00010907	-0.02814	0.161702
64.8	0.871611	0.5558	0.302999	0.148743	0.0317821		64.8	0.206795	0.0793198	-0.00046402	-0.0288085	0.161486
65	0.87212	0.555737	0.302497	0.148186	0.0312084		65	0.206137	0.0793451	-0.00025039	-0.0289612	0.161904
65.2	0.873113	0.556766	0.30274	0.148426	0.0313619		65.2	0.205794	0.0789587	-0.00023385	-0.0290206	0.16209
65.4	0.874115	0.557666	0.302896	0.148256	0.0312968		65.4	0.205566	0.0789493	-0.00056351	-0.0294568	0.161555
65.6	0.875205	0.557768	0.303428	0.14856	0.0309398		65.6	0.206049	0.0788518	-0.00045089	-0.029582	0.161688
65.8	0.875635	0.557518	0.303174	0.148506	0.0306569		65.8	0.20562	0.0789669	-0.00032125	-0.0293383	0.162154
66	0.876369	0.558133	0.303737	0.148802	0.0302941		66	0.205496	0.0790824	-0.00027589	-0.0294806	0.162037
66.2	0.876836	0.559201	0.304144	0.149301	0.0301665		66.2	0.205079	0.079529	0.00013411	-0.0295115	0.162262
66.4	0.877052	0.559445	0.304658	0.149369	0.0297947		66.4	0.204774	0.079131	-0.00048842	-0.0297813	0.1621
66.6	0.877864	0.560041	0.304864	0.149681	0.0298551		66.6	0.204661	0.0790707	-0.0002415	-0.0295171	0.161902
66.8	0.878638	0.560592	0.305073	0.150048	0.0300317		66.8	0.205101	0.0792416	6.413e-05	-0.0293187	0.162007
67	0.879446	0.561123	0.3054	0.150429	0.0302238		67	0.20514	0.0794806	0.00042736	-0.0294873	0.162653
67.2	0.880926	0.561812	0.306286	0.151126	0.0309142		67.2	0.205322	0.0799435	0.00013219	-0.029501	0.162823
67.4	0.881912	0.562577	0.30673	0.151592	0.0309076		67.4	0.205701	0.0805549	0.00055505	-0.0292972	0.163288
67.6	0.883506	0.563334	0.307204	0.151592	0.0306882		67.6	0.206306	0.0807502	0.00074848	-0.0290304	0.163556
67.8	0.884154	0.563899	0.307212	0.151607	0.0306119		67.8	0.207094	0.0808235	0.00090956	-0.0290744	0.164198
68	0.88534	0.565126	0.308036	0.151708	0.0310045		68	0.207433	0.0809693	0.00065334	-0.0289377	0.164412
68.2	0.88678	0.565766	0.308081	0.151576	0.0314755		68.2	0.207944	0.0813661	0.00070872	-0.0289089	0.164228
68.4	0.888084	0.566563	0.308741	0.151938	0.0315448		68.4	0.207882	0.0817398	0.00070313	-0.0290229	0.164399
68.6	0.889181	0.567649	0.309223	0.152443	0.0317651		68.6	0.208063	0.0813303	0.00043932	-0.0296046	0.163755
68.8	0.89012	0.567948	0.309619	0.152499	0.0318898		68.8	0.207851	0.0806412	0.00017846	-0.030501	0.163313
69	0.891538	0.568751	0.310278	0.15324	0.0326231		69	0.207721	0.0806999	0.00028361	-0.0305836	0.163453
69.2	0.893288	0.569654	0.310855	0.153488	0.0329948		69.2	0.207983	0.0809674	0.00044729	-0.0302198	0.163793
69.4	0.89451	0.570709	0.311048	0.154093	0.0328903		69.4	0.208336	0.0810582	0.0004068	-0.030921	0.163207
69.6	0.89536	0.571138	0.311566	0.154501	0.0324922		69.6	0.208484	0.0808465	0.0004385	-0.0308884	0.163213
69.8	0.895868	0.57159	0.311472	0.154812	0.0321859		69.8	0.208236	0.0805358	7.505e-05	-0.0307587	0.163621
70	0.897105	0.572755	0.312023	0.155527	0.0323437		70	0.208117	0.080421	7.353e-05	-0.0308774	0.163736
70.2	0.897597	0.573287	0.312072	0.156198	0.0322471		70.2	0.208459	0.0803677	0.00035498	-0.0309063	0.16444
70.4	0.898179	0.573427	0.311712	0.156149	0.0315274		70.4	0.20873	0.0801342	-0.00033023	-0.0309005	0.164516
70.6	0.899269	0.573954	0.311504	0.156633	0.0313434		70.6	0.208476	0.0795878	-0.00042794	-0.0313053	0.164095
70.8	0.899946	0.574223	0.311443	0.156684	0.0313895		70.8	0.208568	0.0795758	-0.00032195	-0.0316158	0.164353
71	0.900741	0.574677	0.311162	0.15684	0.0311243		71	0.20831	0.0794791	-0.00080674	-0.0316789	0.164303
71.2	0.901989	0.575442	0.312391	0.157988	0.0316787		71.2	0.209118	0.0799956	-0.00087545	-0.0310955	0.164566
71.4	0.902719	0.575897	0.312841	0.157969	0.0315172		71.4	0.209536	0.0803526	-0.00071621	-0.0310059	0.16502
71.6	0.90284	0.575982	0.312673	0.157601	0.0309478		71.6	0.209973	0.0800201	-0.00079471	-0.0309255	0.165238
71.8	0.903209	0.576601	0.312987	0.157947	0.0308679		71.8	0.21003	0.0796154	-0.0010444	-0.031171	0.165291
72	0.904187	0.577547	0.313598	0.158271	0.0310134		72	0.210081	0.0798202	-0.00105295	-0.030944	0.164845
72.2	0.905461	0.578163	0.314079	0.158657	0.0311153		72.2	0.209876	0.0799796	-0.00111745	-0.0310935	0.164466
72.4	0.906101	0.578503	0.315143	0.158731	0.0309978		72.4	0.210181	0.0798823	-0.00102682	-0.0314341	0.164267
72.6	0.905977	0.578702	0.315496	0.158136	0.0307111		72.6	0.210069	0.079303	-0.00182471	-0.0319326	0.16382
72.8	0.906954	0.578771	0.316194	0.157901	0.0307974		72.8	0.20966	0.079704	-0.00198189	-0.0317261	0.16428
73	0.908505	0.579735	0.317033	0.158704	0.0314429		73	0.209652	0.0799202	-0.0020143	-0.0319422	0.164523
73.2	0.90919	0.579765	0.316865	0.157995	0.0311243		73.2	0.209653	0.0798188	-0.00226991	-0.0322183	0.164662
73.4	0.910445	0.581004	0.317503	0.158806	0.0315975		73.4	0.20931	0.07916	-0.00282459	-0.0333399	0.164284
73.6	0.91051	0.581333	0.318078	0.157939	0.0310714		73.6	0.209002	0.0787429	-0.00343836	-0.0337147	0.164668
73.8	0.911242	0.581728	0.317998	0.157747	0.0311349		73.8	0.208913	0.0786629	-0.00346285	-0.0340481	0.165297
74	0.911831	0.582274	0.318205	0.157424	0.0311853		74	0.209186	0.0792428	-0.00345561	-0.0338386	0.165763
74.2	0.912149	0.582389	0.317917	0.156479	0.0311637		74.2	0.209379	0.0786555	-0.00373629	-0.0342751	0.165961
74.4	0.912679	0.582916	0.317644	0.155757	0.0308925		74.4	0.209444	0.0783076	-0.00434342	-0.0343141	0.165885
74.6	0.913081	0.583123	0.317204	0.155191	0.0303497		74.6	0.209145	0.0780614	-0.00447575	-0.0348251	0.165534
74.8	0.913655	0.583374	0.316841	0.154806	0.0302371		74.8	0.209071	0.0782838	-0.00472722	-0.0352314	0.165618
75	0.914436	0.583599	0.316564	0.154894	0.0297966		75	0.209474	0.0785398	-0.00499071	-0.0349916	0.165626
75.2	0.915472	0.58401	0.317072	0.155317	0.0299272		75.2	0.210046	0.0782702	-0.00494735	-0.0350317	0.165863
75.4	0.915892	0.584168	0.316717	0.15484	0.029661		75.4	0.209934	0.0789213	-0.00506731	-0.034923	0.166209
75.6	0.917316	0.584957	0.317202	0.155595	0.0299688		75.6	0.210134	0.0786348	-0.00521109	-0.0345799	0.166423
75.8	0.918886	0.585577	0.317945	0.156407	0.0302035		75.8	0.210579	0.0789187	-0.00473322	-0.0340602	0.166731
76	0.920462	0.586467	0.318675	0.156996	0.0303133		76	0.211154	0.0790918	-0.00467612	-0.0336758	0.16663
76.2	0.922096	0.587235	0.319815	0.157718	0.0307104		76.2	0.211394	0.0795313	-0.00469498	-0.0336242	0.166865
76.4	0.923316	0.587842	0.320372	0.158082	0.0304448		76.4	0.211445	0.0790892	-0.00555818	-0.0340818	0.166315
76.6	0.924357	0.588874	0.320904	0.158965	0.0304129		76.6	0.211336	0.0790351	-0.00582367	-0.0340869	0.166625
76.8	0.925543	0.589527	0.321569	0.160112	0.030801		76.8	0.211345	0.0793014	-0.00562309	-0.0340792	0.16721
77	0.926321	0.590515	0.321953	0.160658	0.0310123		77	0.21145	0.0792272	-0.00538391	-0.0347254	0.167356
77.2	0.927029	0.591327	0.322627	0.161378	0.0313723		77.2	0.211248	0.0790514	-0.00514671	-0.0347306	0.16727
77.4	0.928368	0.59272	0.323845	0.162339	0.031735		77.4	0.211251	0.0789775	-0.00489597	-0.03501	0.167505
77.6	0.92871	0.593344	0.324387	0.162056	0.0310531		77.6	0.21092	0.0789911	-0.00483829	-0.0353399	0.167139
77.8	0.929447	0.593748	0.324671	0.162116	0.0310128		77.8	0.210629	0.0787228	-0.00456072	-0.0354348	0.166996
78	0.929862	0.594291	0.325217	0.16172	0.0310194		78	0.210971	0.0787526	-0.00439748	-0.035665	0.166957
78.2	0.930487	0.595141	0.32555	0.161616	0.0310659		78.2	0.210522	0.0781206	-0.00443503	-0.0363392	0.166788
78.4	0.931319	0.595715	0.325504	0.161625	0.029968		78.4	0.210601	0.0782506	-0.0045809	-0.0363281	0.16689
78.6	0.932007	0.595549	0.325024	0.161429	0.0290965		78.6	0.210874	0.0780413	-0.00469063	-0.036874	0.166802
78.8	0.932773	0.596502	0.325193	0.161625	0.0293203		78.8	0.210975	0.0780589	-0.00481686	-0.0377162	0.166904
79	0.933419	0.596503	0.324725	0.161535	0.0290378		79	0.211568	0.0779409	-0.00476476	-0.0376119	0.167261
79.2	0.934692	0.597055	0.325087	0.161704	0.0293829		79.2	0.211888	0.0778493	-0.00474673	-0.0378119	0.167487
79.4	0.935909	0.597767	0.325624	0.162105	0.0303932		79.4	0.211814	0.0785741	-0.00486949	-0.0371378	0.167973
79.6	0.937581	0.59879	0.326556	0.162444	0.0309364		79.6	0.211949	0.0782425	-0.00494749	-0.037073	0.168212
79.8	0.938554	0.599537	0.326439	0.162111	0.0308502		79.8	0.212482	0.078913	-0.00486636	-0.0370902	0.168357
80	0.93995	0.600806	0.326942	0.162182	0.0312817		80	0.213042	0.0790479	-0.00500347	-0.037102	0.168021
80.2	0.941108	0.601406	0.326919	0.16225	0.031211		80.2	0.213223	0.079452	-0.00515934	-0.0375481	0.167734
80.4	0.941939	0.601782	0.326457	0.162225	0.0308572		80.4	0.213367	0.0794761	-0.00529678	-0.0377847	0.16763
80.6	0.942006	0.602339	0.326469	0.162323	0.0307707		80.6	0.213651	0.0800055	-0.00456584	-0.0376206	0.168654
80.8	0.941835	0.602418	0.326199	0.161871	0.0306707		80.8	0.21378	0.0803577	-0.00462105	-0.0375936	0.168722
81	0.942727	0.603076	0.326388	0.162146	0.0308363		81	0.214069	0.0808314	-0.0039374	-0.0376297	0.168873
81.2	0.944004	0.603217	0.326658	0.162155	0.0311661		81.2	0.213548	0.0804465	-0.00405955	-0.0378237	0.168334
81.4	0.944474	0.603591	0.32703	0.161741	0.0310878		81.4	0.213468	0.0806233	-0.00421017	-0.0377317	0.168188
81.6	0.944952	0.60388	0.327222	0.161924	0.0308472		81.6	0.21313	0.0805321	-0.00454389	-0.0380392	0.167337
81.8	0.946035	0.603977	0.327408	0.16185	0.0306747		81.8	0.213238	0.0804407	-0.00445289	-0.0377974	0.16766
82	0.946649	0.604693	0.327685	0.161988	0.0307495		82	0.21327	0.0804408	-0.0047346	-0.0377963	0.167576
82.2	0.947479	0.605359	0.328233	0.162781	0.0305384		82.2	0.212882	0.0800534	-0.00517328	-0.0378403	0.167682
82.4	0.948489	0.605749	0.328443	0.163105	0.030274		82.4	0.213291	0.0795891	-0.00554527	-0.0379116	0.167612
82.6	0.948808	0.605508	0.328314	0.163186	0.0299683		82.6	0.213711	0.0788554	-0.00592175	-0.0384097	0.167535
82.8	0.949173	0.606517	0.328613	0.163443	0.0301681		82.8	0.213642	0.0785317	-0.00614386	-0.0388024	0.167992
83	0.950215	0.607146	0.329049	0.163928	0.030177		83	0.213647	0.0777576	-0.00656681	-0.038293	0.16817
83.2	0.951277	0.607982	0.329695	0.164352	0.0304269		83.2	0.214007	0.0777183	-0.0069265	-0.0379011	0.168575
83.4	0.952327	0.609026	0.33064	0.164759	0.0313236		83.4	0.213874	0.0775142	-0.00736451	-0.0378104	0.168656
83.6	0.953047	0.609581	0.330794	0.16455	0.0306036		83.6	0.214156	0.0772375	-0.00742821	-0.0383667	0.168326
83.8	0.953613	0.610331	0.331034	0.164682	0.0306865		83.8	0.214045	0.0773497	-0.00792554	-0.03885	0.167455
84	0.954379	0.610655	0.331542	0.164482	0.0304196		84	0.214031	0.0773889	-0.00798298	-0.0388429	0.167251
84.2	0.954747	0.610715	0.331684	0.164404	0.0300331		84.2	0.213896	0.0774719	-0.00839498	-0.0394311	0.167234
84.4	0.955046	0.610905	0.331618	0.1642	0.0298365		84.4	0.213687	0.0775501	-0.008027	-0.0398314	0.168019
84.6	0.95552	0.611425	0.331744	0.163791	0.0296331		84.6	0.21379	0.0774929	-0.00858239	-0.0403033	0.167784
84.8	0.956725	0.612114	0.332117	0.163969	0.0298299		84.8	0.214102	0.0774517	-0.0085875	-0.0404473	0.167368
85	0.958287	0.612818	0.332971	0.164391	0.0306046		85	0.214067	0.0771645	-0.00843708	-0.0409391	0.167225
85.2	0.959323	0.613174	0.333016	0.164019	0.0305884		85.2	0.213447	0.0770954	-0.00894045	-0.0414059	0.16694
85.4	0.959727	0.613646	0.333344	0.163659	0.030224		85.4	0.213603	0.0774131	-0.00902516	-0.0410686	0.167202
85.6	0.961193	0.613917	0.333236	0.164048	0.0299495		85.6	0.213852	0.077294	-0.00909284	-0.0414108	0.167009
85.8	0.962837	0.61452	0.333524	0.16418	0.0301411		85.8	0.213803	0.0772362	-0.00880639	-0.0408228	0.167808
86	0.96342	0.615283	0.333769	0.16454	0.030106		86	0.21369	0.0768095	-0.0091432	-0.0414048	0.167795
86.2	0.963943	0.615555	0.334133	0.164881	0.0297371		86.2	0.21322	0.0760008	-0.00943732	-0.0420535	0.167438
86.4	0.964335	0.615575	0.333567	0.164751	0.0294394		86.4	0.213664	0.0757613	-0.00937541	-0.0421584	0.167614
86.6	0.964366	0.615421	0.332952	0.16425	0.0286359		86.6	0.213728	0.0754569	-0.00925008	-0.0426587	0.167737
86.8	0.965026	0.616178	0.33307	0.164855	0.0286064		86.8	0.213956	0.0755507	-0.00891186	-0.0423259	0.168146
87	0.966457	0.616927	0.33414	0.165318	0.029066		87	0.214564	0.0754876	-0.00875864	-0.0419176	0.168606
87.2	0.967179	0.617297	0.334377	0.165448	0.029403		87.2	0.2154	0.075836	-0.00821136	-0.0417454	0.169123
87.4	0.968082	0.617887	0.335407	0.165871	0.0298768		87.4	0.21558	0.076188	-0.00769088	-0.0422693	0.169275
87.6	0.968392	0.61798	0.335544	0.165759	0.0291124		87.6	0.215034	0.0756126	-0.00811409	-0.0430183	0.168656
87.8	0.969338	0.619074	0.336264	0.166084	0.0294334		87.8	0.215177	0.0758163	-0.008258	-0.0431216	0.168751
88	0.97034	0.619926	0.336916	0.166277	0.0292366		88	0.215023	0.076073	-0.00789759	-0.0432997	0.168981
88.2	0.97091	0.620953	0.337108	0.166721	0.0294793		88.2	0.21516	0.0767204	-0.00789883	-0.0436211	0.169154
88.4	0.971739	0.621511	0.337227	0.167013	0.0296476		88.4	0.215125	0.0768272	-0.00769601	-0.043569	0.169544
88.6	0.973291	0.622629	0.338165	0.167647	0.0301354		88.6	0.215619	0.0766792	-0.00822694	-0.0437608	0.169263
88.8	0.974488	0.623827	0.339328	0.168561	0.030582		88.8	0.215693	0.0767973	-0.00826646	-0.0437833	0.169545
89	0.975443	0.624729	0.339839	0.168956	0.0308123		89	0.215597	0.0764864	-0.0085095	-0.0437194	0.169415
89.2	0.976054	0.62531	0.340068	0.168705	0.0302628		89.2	0.215179	0.0768332	-0.0088528	-0.043716	0.169168
89.4	0.977459	0.626012	0.340413	0.168575	0.0301541		89.4	0.215325	0.0769618	-0.00913604	-0.0433622	0.16918
89.6	0.97897	0.626614	0.340203	0.168912	0.0301876		89.6	0.215081	0.0768796	-0.00943912	-0.0434829	0.16886
89.8	0.97955	0.627327	0.340394	0.169294	0.0300161		89.8	0.214797	0.0764519	-0.00998044	-0.0433957	0.168978
90	0.97958	0.627388	0.340383	0.169393	0.0292825		90	0.214544	0.0759256	-0.0109986	-0.0439673	0.168468
90.2	0.979876	0.627638	0.340481	0.169309	0.0289282		90.2	0.214466	0.0759093	-0.0112682	-0.0439299	0.167947
90.4	0.980955	0.628351	0.340744	0.169708	0.029084		90.4	0.215131	0.0760002	-0.0111109	-0.0434723	0.168567
90.6	0.981437	0.628729	0.340658	0.169398	0.0286757		90.6	0.215235	0.0760563	-0.0111351	-0.043368	0.168382
90.8	0.982371	0.628779	0.341394	0.169875	0.0288632		90.8	0.215694	0.0763792	-0.0107107	-0.0426848	0.168844
91	0.98325	0.629625	0.342187	0.169845	0.0293986		91	0.215361	0.0767102	-0.0106929	-0.0425703	0.169611
91.2	0.983616	0.629665	0.34194	0.169648	0.0293312		91.2	0.215562	0.0769194	-0.0103411	-0.0424446	0.170313
91.4	0.984646	0.630486	0.342375	0.17023	0.0294265		91.4	0.215226	0.0770676	-0.0103341	-0.0426894	0.170359
91.6	0.985726	0.631378	0.342927	0.170682	0.0297069		91.6	0.215068	0.0767121	-0.010373	-0.0429523	0.170675
91.8	0.986427	0.632209	0.342772	0.171211	0.0299526		91.8	0.21589	0.0774482	-0.00997322	-0.0428257	0.171452
92	0.986888	0.63261	0.342895	0.171299	0.030096		92	0.215688	0.0779156	-0.00965532	-0.0427487	0.171748
92.2	0.987134	0.632882	0.342385	0.171415	0.0301163		92.2	0.215847	0.0781396	-0.00984161	-0.0428752	0.172142
92.4	0.988088	0.632822	0.342745	0.171941	0.030246		92.4	0.21633	0.0783761	-0.00986402	-0.0430251	0.172632
92.6	0.989223	0.633665	0.343126	0.17175	0.0299761		92.6	0.216761	0.0785901	-0.00994667	-0.0436103	0.172656
92.8	0.990019	0.634464	0.343714	0.172097	0.0301533		92.8	0.217266	0.0785132	-0.00997283	-0.0438971	0.172544
93	0.991461	0.63529	0.343791	0.172131	0.0301012		93	0.2173	0.0778883	-0.00995894	-0.0440736	0.172098
93.2	0.992472	0.635643	0.344372	0.171758	0.0301366		93.2	0.217329	0.0780476	-0.0100203	-0.0445554	0.172059
93.4	0.994279	0.636694	0.344598	0.172268	0.0307132		93.4	0.217014	0.0773286	-0.0106113	-0.044827	0.171935
93.6	0.995232	0.636487	0.344804	0.17233	0.0305057		93.6	0.216797	0.0768737	-0.0112572	-0.0452259	0.171922
93.8	0.996362	0.637364	0.345269	0.172807	0.0307736		93.8	0.217105	0.0765925	-0.0115861	-0.0452681	0.171798
94	0.997295	0.637653	0.345754	0.172968	0.030713		94	0.217076	0.0767365	-0.0116813	-0.0453514	0.171662
94.2	0.998107	0.638186	0.345896	0.172824	0.0306597		94.2	0.217351	0.0766371	-0.0114072	-0.045573	0.17165
94.4	0.998592	0.638486	0.34606	0.172671	0.0304677		94.4	0.217326	0.0762796	-0.0111967	-0.0456705	0.171856
94.6	0.998649	0.638222	0.346066	0.172206	0.0304139		94.6	0.217534	0.0773039	-0.0109462	-0.0453813	0.172264
94.8	0.999366	0.638782	0.346808	0.172425	0.030937		94.8	0.217563	0.0779032	-0.0107202	-0.0452273	0.172633
95	0.999466	0.639349	0.346737	0.172273	0.0305882		95	0.217411	0.0777039	-0.0107205	-0.0452095	0.172975
95.2	0.999824	0.639798	0.34677	0.17242	0.0304311		95.2	0.218191	0.0781477	-0.0103433	-0.0448759	0.173246
95.4	1.0005	0.641257	0.347088	0.173065	0.0303308		95.4	0.218067	0.0781802	-0.0103314	-0.0452047	0.172898
95.6	1.0005	0.641187	0.346998	0.173001	0.030159		95.6	0.218461	0.0783981	-0.0101249	-0.0455947	0.173454
95.8	1.00008	0.641435	0.346691	0.173031	0.0296471		95.8	0.218601	0.0781273	-0.0105378	-0.0459018	0.173464
96	1.0003	0.641547	0.346953	0.173006	0.0292926		96	0.218676	0.0779805	-0.0104346	-0.0455897	0.173343
96.2	1.00052	0.641925	0.347149	0.17275	0.0290042		96.2	0.218685	0.0775048	-0.0112963	-0.0463083	0.173035
96.4	1.00146	0.642619	0.347751	0.173257	0.0287499		96.4	0.219168	0.0779308	-0.0117955	-0.0466537	0.173116
96.6	1.00236	0.643695	0.348381	0.173385	0.0285649		96.6	0.219187	0.0773946	-0.012322	-0.0473778	0.172563
96.8	1.00337	0.644517	0.349341	0.173842	0.0289868		96.8	0.219399	0.0769014	-0.0124064	-0.0473272	0.172534
97	1.00477	0.645213	0.349805	0.174025	0.029115		97	0.219357	0.0765958	-0.0126596	-0.0476817	0.172371
97.2	1.00566	0.64605	0.350568	0.174551	0.0294629		97.2	0.21953	0.0765796	-0.012814	-0.0478899	0.172439
97.4	1.00685	0.646863	0.350769	0.175189	0.0296157		97.4	0.219136	0.0761994	-0.0133227	-0.0481194	0.172528
97.6	1.00741	0.64677	0.350697	0.17531	0.0288343		97.6	0.219257	0.0766489	-0.0136282	-0.0484757	0.172273
97.8	1.00852	0.647917	0.350794	0.175863	0.0291163		97.8	0.219336	0.0766407	-0.0136154	-0.0486566	0.172098
98	1.00903	0.648269	0.350837	0.176326	0.0293195		98	0.219401	0.0762304	-0.0138414	-0.0493461	0.172147
98.2	1.00988	0.648919	0.350778	0.176375	0.0291784		98.2	0.219618	0.075779	-0.0138925	-0.0497582	0.171818
98.4	1.01101	0.649589	0.351133	0.176902	0.0295622		98.4	0.219792	0.0763407	-0.0139504	-0.0500617	0.171809
98.6	1.01223	0.650578	0.351425	0.177172	0.0298763		98.6	0.220314	0.0768569	-0.0138914	-0.0500292	0.171998
98.8	1.01325	0.651143	0.351425	0.177522	0.0296215		98.8	0.219979	0.0762016	-0.0141685	-0.0506833	0.171487
99	1.01376	0.651141	0.351059	0.177809	0.0294293		99	0.219985	0.0754106	-0.0138525	-0.0512814	0.170968
99.2	1.01462	0.651583	0.350592	0.177628	0.0292772		99.2	0.219664	0.0754776	-0.0139468	-0.0517442	0.170462
99.4	1.01466	0.651235	0.350339	0.177479	0.0287848		99.4	0.219399	0.0754355	-0.0137466	-0.0518665	0.170322
99.6	1.01529	0.650872	0.350524	0.17762	0.0287885		99.6	0.219691	0.0753421	-0.0137941	-0.051865	0.170371
99.8	1.01643	0.651212	0.351171	0.178109	0.0290909		99.8	0.219529	0.074464	-0.0141693	-0.0520603	0.170357
100	1.01748	0.651196	0.351736	0.178204	0.0293069		100	0.219839	0.0748788	-0.01418	-0.0517316	0.170571
100.2	1.01839	0.651748	0.351889	0.178108	0.0294697		100.2	0.219214	0.0743959	-0.0152909	-0.0523931	0.170411
100.4	1.01925	0.652309	0.352037	0.178691	0.0295332		100.4	0.219056	0.0746058	-0.0152727	-0.0524182	0.171029
100.6	1.01979	0.65269	0.352741	0.178764	0.030127		100.6	0.218981	0.0749372	-0.0153156	-0.051968	0.171248
100.8	1.02059	0.65341	0.353424	0.178913	0.03025		100.8	0.218614	0.0749173	-0.0153846	-0.051811	0.171177
101	1.02189	0.654385	0.353961	0.179169	0.0307196		101	0.218758	0.0751741	-0.0154813	-0.0518306	0.171597
101.2	1.02247	0.655247	0.354454	0.179126	0.0306863		101.2	0.218711	0.0753264	-0.0153864	-0.0514725	0.17204
101.4	1.02259	0.655341	0.35416	0.178384	0.0300876		101.4	0.218266	0.0753128	-0.015844	-0.0515462	0.172048
101.6	1.02274	0.65539	0.353946	0.178283	0.0296782		101.6	0.218502	0.0756941	-0.016047	-0.0513967	0.172153
101.8	1.02347	0.656377	0.354608	0.178844	0.0301213		101.8	0.218835	0.07608	-0.0160272	-0.0510537	0.172553
102	1.02418	0.657236	0.354971	0.179051	0.0302876		102	0.21946	0.0768501	-0.0158302	-0.0506436	0.173327
102.2	1.02494	0.657779	0.355399	0.179303	0.0297562		102.2	0.218921	0.0765933	-0.0159895	-0.0507267	0.173224
102.4	1.0256	0.658367	0.35599	0.179388	0.0298817		102.4	0.218737	0.0767998	-0.0160256	-0.0509733	0.173494
102.6	1.02602	0.658744	0.356032	0.179146	0.0294071		102.6	0.219124	0.0764592	-0.015394	-0.0511965	0.173778
102.8	1.0262	0.658354	0.355672	0.178557	0.0287295		102.8	0.21862	0.0758305	-0.0157009	-0.0519041	0.173284
103	1.02666	0.658653	0.355598	0.178235	0.0285703		103	0.218694	0.0754836	-0.0155395	-0.0522071	0.172785
103.2	1.02744	0.659	0.355735	0.178061	0.0283376		103.2	0.218902	0.0759784	-0.0153921	-0.0518845	0.173257
103.4	1.0276	0.658925	0.35591	0.177882	0.0280911		103.4	0.219475	0.0764383	-0.0152481	-0.0513305	0.173825
103.6	1.02938	0.659965	0.356612	0.178361	0.0281936		103.6	0.220028	0.0763779	-0.0154082	-0.0514802	0.173798
103.8	1.03069	0.661141	0.357188	0.178772	0.0284955		103.8	0.220193	0.0755854	-0.0153952	-0.0518509	0.174122
104	1.03202	0.662191	0.357955	0.179201	0.0289618		104	0.2198	0.0753471	-0.0159779	-0.052564	0.173996
104.2	1.03315	0.66324	0.358097	0.17963	0.0292271		104.2	0.219545	0.0747868	-0.0161613	-0.0529602	0.174024
104.4	1.03457	0.664325	0.358744	0.180118	0.0295894		104.4	0.21957	0.0744718	-0.0162678	-0.0533008	0.173931
104.6	1.03567	0.66535	0.359254	0.180241	0.029911		104.6	0.219325	0.0742282	-0.0167917	-0.0537959	0.173448
104.8	1.03711	0.666386	0.359674	0.180751	0.0298155		104.8	0.219569	0.0735912	-0.0166804	-0.0548341	0.173092
105	1.03834	0.667058	0.360058	0.180607	0.0297071		105	0.219518	0.0731445	-0.0166565	-0.05533	0.172867
105.2	1.03914	0.667361	0.359963	0.180777	0.0292821		105.2	0.21954	0.072439	-0.0169383	-0.056105	0.17224
105.4	1.03922	0.667014	0.359448	0.180186	0.0286031		105.4	0.219752	0.0722712	-0.0172574	-0.056254	0.171932
105.6	1.03953	0.666694	0.359439	0.180526	0.0284838		105.6	0.220358	0.0726832	-0.0170496	-0.0559593	0.172027
105.8	1.04	0.667372	0.360172	0.181066	0.0282965		105.8	0.22029	0.0726628	-0.0169124	-0.0559065	0.171803
106	1.04036	0.667753	0.360909	0.181202	0.0283563		106	0.220282	0.0727316	-0.0169284	-0.0559697	0.172114
106.2	1.04081	0.667961	0.362168	0.182065	0.0286045		106.2	0.219595	0.0722176	-0.016873	-0.0565377	0.171788
106.4	1.04139	0.668298	0.362663	0.181892	0.0288668		106.4	0.219578	0.0726944	-0.0165143	-0.0569298	0.171761
106.6	1.04182	0.668526	0.362696	0.181579	0.0287302		106.6	0.219413	0.0727265	-0.0166811	-0.0572321	0.171444
106.8	1.04171	0.668874	0.362975	0.181399	0.0287569		106.8	0.21904	0.0728603	-0.0168053	-0.0569706	0.171452
107	1.04236	0.669421	0.363739	0.18173	0.0292143		107	0.218476	0.0730755	-0.0168569	-0.056675	0.171609
107.2	1.04321	0.669897	0.364354	0.181644	0.0297391		107.2	0.218358	0.0735234	-0.0167341	-0.0561812	0.172158
107.4	1.04355	0.670374	0.364643	0.181	0.0294791		107.4	0.217904	0.073675	-0.0170178	-0.0559845	0.172196
107.6	1.04503	0.671795	0.365534	0.181658	0.0300637		107.6	0.217753	0.0736908	-0.0170606	-0.0560808	0.17222
107.8	1.04632	0.672989	0.366044	0.18187	0.0305337		107.8	0.217417	0.0731337	-0.017541	-0.0565051	0.171965
108	1.04724	0.673145	0.366191	0.181816	0.0305573		108	0.216865	0.0732687	-0.0178856	-0.056688	0.172069
108.2	1.04787	0.673869	0.3658	0.18195	0.0304523		108.2	0.217196	0.0735644	-0.0178243	-0.0558414	0.172288
108.4	1.04895	0.674444	0.365569	0.181895	0.0304283		108.4	0.217179	0.0734997	-0.018215	-0.0559114	0.172456
108.6	1.04976	0.674663	0.365654	0.182017	0.0299617		108.6	0.217631	0.0732656	-0.0180448	-0.0558734	0.172937
108.8	1.05086	0.674541	0.365421	0.182309	0.0294082		108.8	0.218771	0.0737892	-0.0175092	-0.0551505	0.17361
109	1.05192	0.674296	0.365113	0.182394	0.0290264		109	0.218861	0.0736176	-0.0175505	-0.0551223	0.173604
109.2	1.05297	0.674056	0.364848	0.182642	0.0290479		109.2	0.220065	0.0738932	-0.0175878	-0.0548138	0.174036
109.4	1.05341	0.673872	0.36449	0.182425	0.0285449		109.4	0.220581	0.0742947	-0.0174975	-0.0543466	0.174531
109.6	1.05424	0.67408	0.364875	0.182918	0.0285629		109.6	0.220929	0.0744263	-0.0175719	-0.0540468	0.174805
109.8	1.05541	0.674885	0.365253	0.183307	0.0287602		109.8	0.220858	0.0742362	-0.0179859	-0.0542029	0.174696
110	1.05664	0.675087	0.365911	0.183814	0.0292472		110	0.221254	0.0740441	-0.0182176	-0.054405	0.175054
110.2	1.05762	0.675312	0.366652	0.184469	0.0294048		110.2	0.221184	0.0740198	-0.017902	-0.054695	0.174968
110.4	1.05829	0.675945	0.366956	0.184416	0.0294833		110.4	0.221491	0.0741971	-0.0180513	-0.0548219	0.175098
110.6	1.05894	0.676198	0.367764	0.184244	0.0293443		110.6	0.221658	0.0735523	-0.0182547	-0.0548478	0.175237
110.8	1.05928	0.677038	0.368401	0.18453	0.0296227		110.8	0.221798	0.0733625	-0.0181614	-0.0546015	0.175754
111	1.0603	0.677773	0.369151	0.184522	0.0297654		111	0.221299	0.0731304	-0.0184994	-0.0550016	0.175417
111.2	1.06062	0.678639	0.369367	0.184262	0.0295687		111.2	0.221371	0.0727554	-0.0182024	-0.0553067	0.175058
111.4	1.06066	0.679515	0.369506	0.184419	0.0292518		111.4	0.220999	0.0725792	-0.018866	-0.0558296	0.174772
111.6	1.06126	0.680566	0.36962	0.184692	0.0295209		111.6	0.220584	0.0721472	-0.019338	-0.0565881	0.174114
111.8	1.06171	0.681056	0.369443	0.184633	0.0290511		111.8	0.220617	0.0719847	-0.0194794	-0.0568495	0.173815
112	1.06164	0.681609	0.369782	0.184566	0.0287534		112	0.221023	0.0719456	-0.0196425	-0.0569418	0.174257
112.2	1.0619	0.682243	0.369727	0.184586	0.0286236		112.2	0.221585	0.0724972	-0.0195242	-0.0568226	0.17461
112.4	1.06272	0.682653	0.369884	0.184502	0.0283751		112.4	0.221744	0.0727717	-0.0194718	-0.0571677	0.175069
112.6	1.06317	0.682662	0.370393	0.184873	0.0282184		112.6	0.221684	0.0729466	-0.0194933	-0.0573633	0.175027
112.8	1.06344	0.68224	0.370158	0.184363	0.0277483		112.8	0.221779	0.0736	-0.0198346	-0.0578188	0.174961
113	1.0634	0.682343	0.370049	0.184733	0.0275199		113	0.221706	0.073636	-0.0200291	-0.0585895	0.174676
113.2	1.06423	0.682749	0.370006	0.184853	0.0275309		113.2	0.221758	0.0734391	-0.0206237	-0.0590745	0.174491
113.4	1.06476	0.68326	0.369789	0.185246	0.0273728		113.4	0.22133	0.0730834	-0.0209243	-0.0598467	0.174433
113.6	1.06588	0.68393	0.370434	0.185732	0.0278404		113.6	0.221164	0.0727758	-0.0211241	-0.0598795	0.174067
113.8	1.06706	0.684314	0.370157	0.185828	0.028342		113.8	0.220975	0.0724677	-0.0212362	-0.0602095	0.173779
114	1.0681	0.68504	0.370831	0.186578	0.0286551		114	0.221024	0.0720986	-0.0209202	-0.0606734	0.173763
114.2	1.06865	0.685972	0.371231	0.187206	0.0286653		114.2	0.22104	0.0720496	-0.020655	-0.0603758	0.173684
114.4	1.06994	0.68671	0.372078	0.187659	0.0291607		114.4	0.221492	0.0722126	-0.0204331	-0.0602847	0.173621
114.6	1.07114	0.687166	0.372804	0.187867	0.0292997		114.6	0.221473	0.0716965	-0.0203659	-0.0603305	0.173744
114.8	1.07187	0.687745	0.372679	0.188066	0.0294579		114.8	0.22118	0.0714721	-0.0204624	-0.0603808	0.173521
115	1.07256	0.688386	0.37292	0.188675	0.0294784		115	0.221029	0.071254	-0.020279	-0.0604637	0.173118
115.2	1.07253	0.68854	0.372581	0.188487	0.0286019		115.2	0.220663	0.0707315	-0.0202351	-0.0606135	0.172958
115.4	1.07303	0.689074	0.372902	0.188947	0.0284754		115.4	0.221081	0.0712156	-0.0198645	-0.0602275	0.173377
115.6	1.07396	0.689804	0.373492	0.189371	0.0286009		115.6	0.221246	0.0717426	-0.0195363	-0.0599905	0.173639
115.8	1.07451	0.690279	0.373647	0.189726	0.0284593		115.8	0.221718	0.0719575	-0.0192675	-0.0597758	0.174299
116	1.07482	0.691048	0.374109	0.189841	0.0286155		116	0.221922	0.0719835	-0.0195044	-0.0602145	0.174479
116.2	1.07518	0.691317	0.374162	0.189776	0.0282888		116.2	0.22227	0.072949	-0.0188417	-0.0595586	0.175285
116.4	1.07595	0.691779	0.374936	0.190032	0.0281407		116.4	0.221572	0.0738772	-0.0190791	-0.0595282	0.175752
116.6	1.07608	0.691632	0.37512	0.18996	0.0277627		116.6	0.221488	0.0741044	-0.0194731	-0.0594817	0.175802
116.8	1.07663	0.692006	0.375397	0.189921	0.0273499		116.8	0.221909	0.0745611	-0.0190409	-0.0591498	0.176293
117	1.07711	0.692412	0.375427	0.190393	0.0273846		117	0.222197	0.0747622	-0.0186847	-0.0586504	0.176693
117.2	1.07858	0.692941	0.375601	0.190165	0.0276577		117.2	0.22188	0.0743623	-0.0190034	-0.0590962	0.176689
117.4	1.07864	0.692812	0.375482	0.189941	0.0273989		117.4	0.221602	0.0742481	-0.0190358	-0.0591931	0.1767
117.6	1.07978	0.693642	0.376261	0.190167	0.0280498		117.6	0.221173	0.0740275	-0.0194512	-0.0591111	0.176002
117.8	1.08049	0.694307	0.376629	0.189992	0.0284757		117.8	0.220784	0.073748	-0.0198949	-0.0596023	0.175865
118	1.08154	0.695465	0.377412	0.190665	0.0288677		118	0.220164	0.0732445	-0.020572	-0.0602408	0.175214
118.2	1.08273	0.69596	0.377827	0.190971	0.0293338		118.2	0.220545	0.073297	-0.0205489	-0.0599376	0.175361
118.4	1.08464	0.696807	0.378825	0.191127	0.0300528		118.4	0.220758	0.0729579	-0.0210613	-0.0603718	0.174852
118.6	1.08563	0.696841	0.378937	0.190783	0.0301864		118.6	0.220695	0.0723475	-0.0214991	-0.0609693	0.174979
118.8	1.08619	0.696893	0.378321	0.190325	0.0299544		118.8	0.220662	0.0716426	-0.0220522	-0.0615035	0.174385
119	1.08684	0.697791	0.37872	0.190633	0.0297285		119	0.22114	0.071288	-0.0220212	-0.0618074	0.174354
119.2	1.0873	0.698127	0.378981	0.190458	0.0293539		119.2	0.221189	0.0708889	-0.0219372	-0.0620743	0.174308
119.4	1.08786	0.698285	0.379177	0.190415	0.0294735		119.4	0.221728	0.0705069	-0.0216872	-0.0622428	0.174379
119.6	1.08795	0.698604	0.37907	0.190303	0.0292506		119.6	0.221569	0.0701632	-0.0220819	-0.0627541	0.17452
119.8	1.08799	0.69878	0.378763	0.189808	0.0290319		119.8	0.221504	0.0694292	-0.0225171	-0.0631602	0.174504
120	1.08848	0.699374	0.378825	0.189998	0.0289671		120	0.222108	0.0692169	-0.0226429	-0.0636763	0.174482
120.2	1.08902	0.699426	0.378866	0.189972	0.0286815		120.2	0.222587	0.0696202	-0.0222234	-0.0633826	0.175139
120.4	1.08961	0.69946	0.379395	0.190119	0.028586		120.4	0.222007	0.0697025	-0.0225566	-0.0636294	0.175424
120.6	1.08982	0.699611	0.379432	0.190061	0.028419		120.6	0.222697	0.0695257	-0.0225356	-0.0632265	0.175752
120.8	1.09033	0.699868	0.379405	0.190245	0.0284398		120.8	0.222591	0.0696816	-0.0227485	-0.0637746	0.175532
121	1.09084	0.7003	0.379704	0.190223	0.0282786		121	0.222233	0.0692982	-0.023335	-0.0642512	0.175384
121.2	1.09098	0.700387	0.379571	0.189717	0.0275751		121.2	0.221949	0.0693099	-0.0237447	-0.0648678	0.17545
121.4	1.09117	0.70059	0.37965	0.189649	0.0274583		121.4	0.221503	0.0691517	-0.024618	-0.065126	0.174927
121.6	1.09211	0.701446	0.380426	0.190371	0.0278897		121.6	0.221519	0.0693136	-0.0252632	-0.0658093	0.174431
121.8	1.0927	0.70222	0.381173	0.191003	0.0280525		121.8	0.221701	0.0698582	-0.0254821	-0.0660884	0.174315
122	1.09376	0.703248	0.381392	0.191746	0.028329		122	0.221777	0.0701603	-0.0258543	-0.0659909	0.173999
122.2	1.0951	0.703885	0.381836	0.192413	0.0287992		122.2	0.222705	0.0704818	-0.0252732	-0.0658472	0.174405
122.4	1.09635	0.704663	0.382393	0.192493	0.0288559		122.4	0.22295	0.0706949	-0.0254396	-0.0659956	0.174142
122.6	1.09733	0.704842	0.382408	0.192767	0.0290593		122.6	0.223618	0.0714783	-0.0249828	-0.0658109	0.174645
122.8	1.09888	0.706355	0.383145	0.193792	0.0298494		122.8	0.224324	0.0717136	-0.0245694	-0.0654013	0.17495
123	1.09968	0.706973	0.383386	0.193835	0.0298119		123	0.224645	0.0714981	-0.0242873	-0.0654288	0.175463
123.2	1.10022	0.707043	0.383645	0.193371	0.0298034		123.2	0.22451	0.0714106	-0.0245233	-0.0659147	0.175693
123.4	1.10114	0.706982	0.383327	0.192855	0.0293821		123.4	0.224547	0.0710944	-0.0244903	-0.0658964	0.176125
123.6	1.10124	0.707046	0.382891	0.192591	0.028799		123.6	0.224531	0.0709786	-0.0245796	-0.065551	0.17643
123.8	1.10214	0.707436	0.383122	0.19291	0.0288577		123.8	0.224575	0.0707557	-0.0249038	-0.0658019	0.175972
124	1.10282	0.707983	0.383064	0.193619	0.029221		124	0.224445	0.0701738	-0.0249374	-0.0661514	0.175879
124.2	1.10382	0.708096	0.38347	0.19371	0.0290342		124.2	0.22367	0.0699238	-0.0252921	-0.0662688	0.175732
124.4	1.10434	0.708291	0.383982	0.19403	0.0287932		124.4	0.222644	0.0692095	-0.0258465	-0.0666644	0.175576
124.6	1.10478	0.708732	0.384062	0.194385	0.0286189		124.6	0.221781	0.0686324	-0.0266247	-0.0671147	0.175229
124.8	1.1059	0.709523	0.384482	0.194958	0.0287455		124.8	0.221291	0.0686985	-0.0271135	-0.0679018	0.174967
125	1.10657	0.710444	0.384775	0.19482	0.0283633		125	0.221431	0.0685577	-0.0271129	-0.0679133	0.175308
125.2	1.10724	0.711409	0.384876	0.194954	0.0284379		125.2	0.221419	0.0685669	-0.0273447	-0.0683449	0.175
125.4	1.10783	0.712005	0.38536	0.195401	0.0288787		125.4	0.221265	0.0685696	-0.0279094	-0.0685943	0.174529
125.6	1.1081	0.712429	0.385857	0.195719	0.0287761		125.6	0.221899	0.0688832	-0.0277283	-0.0688513	0.17474
125.8	1.10886	0.713243	0.386761	0.196083	0.0292336		125.8	0.221239	0.0686321	-0.0279617	-0.068991	0.174271
126	1.10936	0.713988	0.386831	0.195967	0.0293177		126	0.221342	0.0681797	-0.0280058	-0.0688296	0.174404
126.2	1.11037	0.71465	0.387471	0.196411	0.0296121		126.2	0.22114	0.0681732	-0.0279373	-0.0692808	0.174429
126.4	1.112	0.715729	0.388398	0.19649	0.0303144		126.4	0.22149	0.0686648	-0.0278556	-0.0691198	0.174738
126.6	1.11291	0.716024	0.388684	0.196646	0.0308415		126.6	0.222091	0.0693909	-0.027341	-0.0685877	0.175162
126.8	1.11401	0.716792	0.389577	0.196509	0.0312938		126.8	0.22226	0.0694212	-0.0270903	-0.0687679	0.175296
127	1.11422	0.717052	0.389318	0.19544	0.0306196		127	0.222354	0.0689154	-0.0274668	-0.0691536	0.175212
127.2	1.11467	0.717369	0.389422	0.195319	0.03033		127.2	0.222111	0.0690074	-0.0275858	-0.0693919	0.17531
127.4	1.11531	0.717738	0.389164	0.195341	0.030434		127.4	0.222187	0.0687388	-0.0272786	-0.0687614	0.175727
127.6	1.11519	0.717902	0.389119	0.195519	0.0303154		127.6	0.222726	0.0690821	-0.0272904	-0.0682624	0.175959
127.8	1.11539	0.718193	0.389287	0.196268	0.0303029		127.8	0.222733	0.0690718	-0.0274237	-0.0689637	0.17583
128	1.11606	0.71865	0.389432	0.196794	0.0302954		128	0.22279	0.0692591	-0.0272475	-0.0687018	0.176196
128.2	1.11713	0.7189	0.39006	0.197492	0.0299001		128.2	0.222564	0.0694927	-0.0274998	-0.0685647	0.17609
128.4	1.11793	0.719295	0.390279	0.198199	0.0299119		128.4	0.222711	0.0696245	-0.0273141	-0.0690249	0.17639
128.6	1.11923	0.719691	0.39053	0.199036	0.0299842		128.6	0.223067	0.0701046	-0.0271743	-0.0685438	0.176896
128.8	1.12051	0.720564	0.390667	0.199293	0.0300583		128.8	0.224072	0.0706477	-0.0267316	-0.0684693	0.177123
129	1.12065	0.720753	0.390454	0.199083	0.0295329		129	0.224283	0.0705995	-0.0266411	-0.0687051	0.176881
129.2	1.12128	0.720994	0.391021	0.199625	0.029478		129.2	0.224081	0.0709178	-0.0266068	-0.0682451	0.176846
129.4	1.12168	0.721224	0.391618	0.199748	0.0289136		129.4	0.223701	0.07112	-0.0267655	-0.0685531	0.176789
129.6	1.12285	0.721931	0.392496	0.199933	0.0289659		129.6	0.223895	0.0715649	-0.0266975	-0.0687584	0.176858
129.8	1.12365	0.722457	0.393571	0.200161	0.0292299		129.8	0.22311	0.0711402	-0.0270087	-0.0687559	0.176376
130	1.12405	0.723195	0.393736	0.200138	0.02881		130	0.223477	0.0711922	-0.0270374	-0.0686412	0.176424
130.2	1.12511	0.724	0.394546	0.200395	0.0288341		130.2	0.222986	0.071066	-0.0274411	-0.0693508	0.175858
130.4	1.12569	0.72438	0.395447	0.200214	0.0290239		130.4	0.223234	0.0712338	-0.0272339	-0.0692604	0.176001
130.6	1.1258	0.724523	0.396	0.199862	0.0286421		130.6	0.223507	0.0715484	-0.0271081	-0.0691497	0.176105
130.8	1.12638	0.725292	0.396548	0.200048	0.0284633		130.8	0.223135	0.0710466	-0.0274724	-0.0693287	0.175973
131	1.12649	0.725902	0.396519	0.200182	0.0285968		131	0.222711	0.0703243	-0.0278708	-0.0695911	0.175871
131.2	1.12657	0.726005	0.396648	0.200643	0.0288358		131.2	0.222631	0.0700313	-0.0278095	-0.0695133	0.176162
131.4	1.12672	0.726055	0.39638	0.200519	0.0290497		131.4	0.222785	0.0695679	-0.0274983	-0.0693629	0.176597
131.6	1.12692	0.725957	0.396318	0.200579	0.0288087		131.6	0.222952	0.0693342	-0.0275594	-0.0696439	0.176517
131.8	1.12755	0.726072	0.396216	0.201109	0.0286521		131.8	0.222893	0.0687568	-0.0275392	-0.0700415	0.176365
132	1.12883	0.726549	0.396501	0.201557	0.0288374		132	0.223514	0.0688426	-0.0270679	-0.0695634	0.176801
132.2	1.12905	0.725958	0.395893	0.201458	0.0282124		132.2	0.223938	0.0688756	-0.0269239	-0.0694933	0.177593
132.4	1.12935	0.726236	0.395226	0.201062	0.0280161		132.4	0.224442	0.0689289	-0.0267574	-0.069802	0.178049
132.6	1.12988	0.726317	0.394961	0.201132	0.0281658		132.6	0.224464	0.0682738	-0.0271184	-0.0694527	0.178101
132.8	1.1299	0.726123	0.394587	0.200391	0.0279629		132.8	0.224304	0.068013	-0.0273141	-0.0696493	0.177986
133	1.13006	0.725749	0.394442	0.200167	0.02754		133	0.223976	0.0676951	-0.0276823	-0.0699737	0.177819
133.2	1.13085	0.726264	0.394692	0.200218	0.0276242		133.2	0.223787	0.0674356	-0.0284065	-0.0698311	0.177602
133.4	1.13217	0.72741	0.395356	0.200414	0.0283123		133.4	0.223771	0.067857	-0.0287173	-0.0704755	0.177389
133.6	1.1329	0.727781	0.395769	0.20038	0.0287476		133.6	0.224061	0.0679892	-0.0289717	-0.0704645	0.177387
133.8	1.13358	0.728915	0.396425	0.200549	0.0289065		133.8	0.223824	0.0675931	-0.0296723	-0.0702012	0.177218
134	1.13426	0.729931	0.39638	0.20111	0.0287951		134	0.224015	0.0679035	-0.029866	-0.0700584	0.177152
134.2	1.13503	0.730975	0.397029	0.201381	0.0290106		134.2	0.224367	0.0680253	-0.030143	-0.0702001	0.177368
134.4	1.13631	0.732086	0.398077	0.202145	0.0295025		134.4	0.224438	0.0680024	-0.0305288	-0.0699054	0.177819
134.6	1.13711	0.733038	0.398188	0.202799	0.0295778		134.6	0.224322	0.06789	-0.0310586	-0.0702941	0.177456
134.8	1.13748	0.733603	0.398291	0.203435	0.029377		134.8	0.224494	0.0681145	-0.031237	-0.0706652	0.177119
135	1.13878	0.734743	0.398995	0.20426	0.03		135	0.224612	0.0678601	-0.0312162	-0.0714751	0.176777
135.2	1.14035	0.735606	0.399884	0.205245	0.0306889		135.2	0.224785	0.0678052	-0.0310714	-0.071674	0.176207
135.4	1.14121	0.735823	0.399774	0.204864	0.0306411		135.4	0.224792	0.0679115	-0.030588	-0.0717843	0.17625
135.6	1.14153	0.736129	0.399876	0.204633	0.0303613		135.6	0.224898	0.0676775	-0.0306173	-0.0720112	0.17618
135.8	1.14237	0.736556	0.400125	0.204615	0.030051		135.8	0.225158	0.0677336	-0.0305339	-0.0723951	0.176091
136	1.14246	0.736668	0.399927	0.204187	0.0297522		136	0.225836	0.0679607	-0.0295181	-0.0723592	0.17688
136.2	1.14233	0.736879	0.399973	0.203883	0.0296005		136.2	0.225592	0.0679754	-0.0293481	-0.0729032	0.17697
136.4	1.14293	0.73761	0.400502	0.203655	0.029917		136.4	0.225136	0.0674431	-0.0294388	-0.0737426	0.176561
136.6	1.14342	0.737712	0.400989	0.203538	0.0301316		136.6	0.225058	0.0675985	-0.029337	-0.0736211	0.177211
136.8	1.14435	0.737676	0.401158	0.202952	0.0299382		136.8	0.224878	0.0674345	-0.0292147	-0.0736053	0.177636
137	1.14508	0.738167	0.401434	0.202679	0.0301485		137	0.224463	0.0669848	-0.0293378	-0.0740393	0.177522
137.2	1.14569	0.73898	0.402219	0.202719	0.0305128		137.2	0.224142	0.0671878	-0.0295285	-0.07399	0.177683
137.4	1.14669	0.739662	0.403027	0.202794	0.0309037		137.4	0.224184	0.0674909	-0.0295939	-0.0738561	0.177786
137.6	1.14727	0.740258	0.403648	0.202605	0.0308239		137.6	0.224234	0.0674497	-0.0299541	-0.0737338	0.177652
137.8	1.14856	0.741426	0.404492	0.203421	0.0311463		137.8	0.224419	0.0679019	-0.0300297	-0.0728445	0.177777
138	1.14939	0.74213	0.404954	0.204223	0.0310692		138	0.224535	0.0678856	-0.0300488	-0.0729124	0.177606
138.2	1.1506	0.743387	0.405458	0.204862	0.0316995		138.2	0.224842	0.0675641	-0.030664	-0.0731976	0.17756
138.4	1.15147	0.744247	0.405682	0.205605	0.0321719		138.4	0.225054	0.0667671	-0.0310286	-0.0735537	0.17708
138.6	1.15154	0.744426	0.405354	0.205957	0.0316916		138.6	0.225741	0.0670976	-0.0310396	-0.0735566	0.177032
138.8	1.15223	0.744812	0.405445	0.20615	0.0314778		138.8	0.226707	0.0677687	-0.0308312	-0.0733442	0.177379
139	1.15385	0.745762	0.406041	0.206852	0.0321		139	0.226541	0.0673799	-0.0313928	-0.0734713	0.177146
139.2	1.15429	0.745885	0.405849	0.206687	0.0322045		139.2	0.226039	0.0669707	-0.0318768	-0.0735197	0.176743
139.4	1.15412	0.745748	0.405178	0.206246	0.0314038		139.4	0.226373	0.0670102	-0.0320224	-0.0735289	0.176838
139.6	1.15358	0.744955	0.404311	0.205234	0.0301355		139.6	0.225984	0.0665778	-0.0326442	-0.0740692	0.17662
139.8	1.15421	0.744743	0.403997	0.205263	0.0299736		139.8	0.225848	0.0665577	-0.0328139	-0.0741682	0.176529
140	1.15475	0.744828	0.404108	0.20554	0.0300748		140	0.225819	0.0666854	-0.0321554	-0.073846	0.177174
140.2	1.15547	0.74489	0.404306	0.205664	0.0301217		140.2	0.22505	0.0667679	-0.0325319	-0.0743307	0.177241
140.4	1.1557	0.744483	0.403822	0.205049	0.0290982		140.4	0.224808	0.0674498	-0.0324537	-0.0745027	0.178218
140.6	1.15621	0.744162	0.403494	0.20489	0.0285581		140.6	0.224785	0.0680978	-0.0325488	-0.0742624	0.179162
140.8	1.15688	0.744184	0.403448	0.204289	0.0282791		140.8	0.224172	0.067761	-0.0329961	-0.0745028	0.179327
141	1.15664	0.744267	0.403288	0.203802	0.0280543		141	0.224219	0.0678833	-0.0327216	-0.0749593	0.179555
141.2	1.15664	0.74435	0.403279	0.203745	0.0276936		141.2	0.224301	0.0681782	-0.0328869	-0.0749377	0.180029
141.4	1.15759	0.744901	0.403781	0.203488	0.0274933		141.4	0.224339	0.0680862	-0.0329586	-0.0751885	0.179809
141.6	1.1582	0.74547	0.403854	0.203526	0.0274373		141.6	0.224685	0.0686941	-0.0328194	-0.0753337	0.180207
141.8	1.15874	0.746067	0.404005	0.203582	0.0275077		141.8	0.224394	0.0680453	-0.0330293	-0.0757881	0.180089
142	1.15963	0.747249	0.404824	0.203912	0.0276123		142	0.224796	0.0676493	-0.0327683	-0.0764145	0.180118
142.2	1.16026	0.747787	0.405062	0.204268	0.028428		142.2	0.225472	0.0667771	-0.0327914	-0.076566	0.180033
142.4	1.16111	0.748397	0.405749	0.204468	0.0286783		142.4	0.22643	0.0663304	-0.0320153	-0.0765522	0.180346
142.6	1.16117	0.748085	0.406216	0.204311	0.0278417		142.6	0.226909	0.066805	-0.0317972	-0.0762974	0.180472
142.8	1.16187	0.748493	0.406367	0.20438	0.027895		142.8	0.227048	0.0667266	-0.0320384	-0.076225	0.180015
143	1.16309	0.749367	0.40735	0.204985	0.0284524		143	0.226606	0.066282	-0.0326243	-0.0764693	0.179282
143.2	1.16343	0.749683	0.407576	0.20515	0.0284423		143.2	0.226403	0.0660075	-0.0324012	-0.0765303	0.179041
143.4	1.16412	0.750338	0.408363	0.205975	0.0284087		143.4	0.227072	0.0660581	-0.032506	-0.0761851	0.178915
143.6	1.16463	0.749935	0.408313	0.205898	0.0280173		143.6	0.226698	0.0657931	-0.0326846	-0.0761762	0.178668
143.8	1.16641	0.750936	0.409373	0.207388	0.0293195		143.8	0.226943	0.0664036	-0.0325098	-0.0753888	0.178772
144	1.168	0.752208	0.410681	0.208776	0.0298508		144	0.226872	0.0668252	-0.0322229	-0.0752364	0.178735
144.2	1.16866	0.752382	0.410581	0.209091	0.0296726		144.2	0.226658	0.0671361	-0.0322897	-0.0757981	0.178382
144.4	1.16917	0.752923	0.411032	0.209071	0.029344		144.4	0.226135	0.0672291	-0.0323867	-0.0759627	0.178537
144.6	1.16982	0.753022	0.411239	0.209463	0.0295041		144.6	0.225855	0.0671573	-0.0326634	-0.07634	0.178303
144.8	1.17001	0.75358	0.411182	0.209371	0.0294298		144.8	0.225282	0.0669452	-0.0332507	-0.0770764	0.177992
145	1.1704	0.754403	0.411183	0.209471	0.0290355		145	0.225025	0.0665918	-0.0336836	-0.0778162	0.177563
145.2	1.17034	0.754691	0.41095	0.209194	0.0287745		145.2	0.224174	0.0662089	-0.0345385	-0.0782304	0.177378
145.4	1.17146	0.755682	0.411411	0.209114	0.0287356		145.4	0.223794	0.0658478	-0.0351067	-0.0789158	0.176862
145.6	1.17187	0.756296	0.411312	0.208927	0.0287056		145.6	0.224179	0.0664051	-0.0350214	-0.078837	0.177298
145.8	1.17231	0.756489	0.411128	0.207901	0.0287798		145.8	0.224	0.0655173	-0.0355818	-0.0794408	0.177107
146	1.17297	0.756676	0.411401	0.208081	0.0287393		146	0.22451	0.0660846	-0.0352367	-0.0797787	0.177132
146.2	1.17336	0.756516	0.411422	0.207684	0.0290243		146.2	0.224647	0.0657039	-0.035512	-0.0801572	0.176967
146.4	1.17374	0.757048	0.411418	0.20709	0.0289764		146.4	0.224946	0.0655809	-0.0355431	-0.0803679	0.176844
146.6	1.17367	0.756837	0.410961	0.206614	0.0283199		146.6	0.224837	0.0656875	-0.0358296	-0.0806467	0.176595
146.8	1.17447	0.757016	0.410676	0.206678	0.028205		146.8	0.224708	0.0654711	-0.0362874	-0.0810508	0.176647
147	1.17544	0.757543	0.411193	0.207072	0.0286633		147	0.224994	0.0654015	-0.036081	-0.0809995	0.177195
147.2	1.17614	0.757723	0.411239	0.207442	0.0284953		147.2	0.22514	0.0651106	-0.0359587	-0.0806777	0.177589
147.4	1.17744	0.758468	0.411733	0.20856	0.0290039		147.4	0.226149	0.0652275	-0.0359556	-0.0802768	0.177704
147.6	1.17859	0.757908	0.412072	0.209306	0.0290502		147.6	0.226244	0.0655046	-0.0352167	-0.0800442	0.177977
147.8	1.17992	0.758784	0.412714	0.210679	0.0298459		147.8	0.226939	0.065634	-0.0350491	-0.0793186	0.178392
148	1.181	0.759427	0.412905	0.21143	0.0295341		148	0.226562	0.0650499	-0.0348169	-0.0793616	0.178477
148.2	1.18104	0.759131	0.412936	0.211065	0.0290284		148.2	0.226402	0.0645768	-0.0347483	-0.079591	0.178323
148.4	1.18136	0.759558	0.413921	0.211599	0.0291126		148.4	0.225561	0.0640443	-0.0352056	-0.079604	0.17824
148.6	1.18165	0.759876	0.413709	0.21184	0.0289694		148.6	0.225869	0.064012	-0.0354781	-0.0800363	0.178698
148.8	1.18271	0.760926	0.414155	0.212707	0.0292898		148.8	0.225632	0.0638061	-0.0361849	-0.0802565	0.178691
149	1.18333	0.761414	0.414749	0.212719	0.0292479		149	0.225594	0.0639077	-0.0362748	-0.0799444	0.17892
149.2	1.18351	0.76199	0.414997	0.21293	0.0294744		149.2	0.22561	0.0640731	-0.0366369	-0.0801053	0.179056
149.4	1.18503	0.763216	0.415914	0.213385	0.0295314		149.4	0.225789	0.0645726	-0.0362641	-0.0801195	0.179228
149.6	1.18524	0.763506	0.415877	0.212955	0.0288455		149.6	0.226234	0.0653886	-0.0357112	-0.0798419	0.179663
149.8	1.18581	0.763702	0.415955	0.212664	0.0289466		149.8	0.226405	0.065357	-0.0361964	-0.0800125	0.179613
150	1.18636	0.764518	0.416477	0.213503	0.0291573		150	0.22633	0.0656336	-0.0359699	-0.0803102	0.179329
150.2	1.1867	0.76544	0.416605	0.21325	0.0290756		150.2	0.226562	0.0653099	-0.0360674	-0.0805811	0.179183
150.4	1.18678	0.766134	0.41672	0.213175	0.0288227		150.4	0.226797	0.0655465	-0.0360742	-0.0808103	0.179216
150.6	1.18723	0.766224	0.417009	0.213315	0.0282187		150.6	0.226702	0.0656937	-0.0360498	-0.081423	0.179151
150.8	1.18784	0.766337	0.417444	0.213608	0.028188		150.8	0.226722	0.0655898	-0.0361204	-0.081664	0.179025
151	1.18872	0.766957	0.417649	0.213543	0.0283831		151	0.226732	0.0656061	-0.035858	-0.0811607	0.179216
151.2	1.18982	0.767583	0.41854	0.214037	0.0289713		151.2	0.22622	0.0655641	-0.0363693	-0.0813293	0.17871
151.4	1.19038	0.767703	0.419065	0.214243	0.02907		151.4	0.226744	0.0657977	-0.0361344	-0.0813303	0.178448
151.6	1.19082	0.76773	0.419603	0.214407	0.028873		151.6	0.226376	0.0653852	-0.0361902	-0.0816453	0.178444
151.8	1.1915	0.768741	0.419581	0.214331	0.0292036		151.8	0.226119	0.0645341	-0.0370845	-0.0817431	0.177858
152	1.19166	0.768699	0.419217	0.213408	0.0283323		152	0.225603	0.0643096	-0.037353	-0.0819326	0.177289
152.2	1.19175	0.768802	0.419613	0.213112	0.0280018		152.2	0.225711	0.0643893	-0.0377129	-0.0820479	0.177063
152.4	1.19278	0.769227	0.419804	0.213596	0.0281936		152.4	0.224781	0.0636208	-0.0386231	-0.0828259	0.176483
152.6	1.19455	0.770325	0.419851	0.21422	0.0284894		152.6	0.22501	0.063307	-0.0391899	-0.0833095	0.17685
152.8	1.1958	0.770972	0.420333	0.214765	0.0287316		152.8	0.224853	0.0631669	-0.0401336	-0.083694	0.176518
153	1.19646	0.771127	0.420421	0.214533	0.0285877		153	0.224755	0.0633055	-0.0404817	-0.0839564	0.17618
153.2	1.19751	0.771832	0.420562	0.214762	0.0284963		153.2	0.224628	0.0632197	-0.0410493	-0.0843102	0.175767
153.4	1.19882	0.772825	0.421131	0.215569	0.029305		153.4	0.224445	0.0631477	-0.0411682	-0.0843658	0.175733
153.6	1.19914	0.772949	0.421135	0.215463	0.0291651		153.6	0.224522	0.0629767	-0.0415837	-0.0843729	0.175896
153.8	1.20015	0.773271	0.421522	0.215909	0.0299632		153.8	0.224979	0.0631105	-0.0416494	-0.0841768	0.176256
154	1.20078	0.773767	0.421436	0.216469	0.0303268		154	0.224746	0.0626346	-0.0417773	-0.0848963	0.176388
154.2	1.20135	0.77438	0.421584	0.216382	0.0302188		154.2	0.224997	0.0631309	-0.0417492	-0.08518	0.176994
154.4	1.20163	0.774367	0.42195	0.216491	0.0301328		154.4	0.224659	0.0628888	-0.041865	-0.0855751	0.17728
154.6	1.20208	0.773928	0.421766	0.215888	0.0299785		154.6	0.22512	0.0623675	-0.0415347	-0.0856238	0.177411
154.8	1.20273	0.774299	0.421936	0.216159	0.0304675		154.8	0.225431	0.0623438	-0.0415929	-0.0854111	0.177752
155	1.20256	0.774318	0.42185	0.215572	0.0304706		155	0.225951	0.0624971	-0.0414466	-0.0852427	0.178366
155.2	1.20319	0.774871	0.422734	0.215942	0.0309213		155.2	0.226605	0.0626813	-0.0416722	-0.0853294	0.178372
155.4	1.203	0.774884	0.422335	0.215467	0.030215		155.4	0.226873	0.0625858	-0.0414404	-0.0857418	0.178191
155.6	1.20233	0.775293	0.422317	0.215482	0.0301069		155.6	0.227064	0.062572	-0.0414908	-0.0855771	0.178524
155.8	1.20194	0.774631	0.421608	0.214395	0.0290957		155.8	0.227431	0.0625107	-0.0410433	-0.0850742	0.178812
156	1.20147	0.774234	0.421165	0.213941	0.0275713		156	0.227685	0.0630463	-0.0408303	-0.0847212	0.178768
156.2	1.20214	0.774606	0.421719	0.214223	0.0274386		156.2	0.227408	0.0629138	-0.0409452	-0.0844894	0.179042
156.4	1.2031	0.775163	0.421948	0.214524	0.0274622		156.4	0.226796	0.062741	-0.0415428	-0.0847733	0.178536
156.6	1.204	0.776024	0.422449	0.215146	0.0276392		156.6	0.227228	0.0628308	-0.0417616	-0.0845362	0.178633
156.8	1.20412	0.776025	0.422353	0.214955	0.0273607		156.8	0.227472	0.063274	-0.041735	-0.0843256	0.178513
157	1.20435	0.776128	0.422438	0.215194	0.0275167		157	0.227298	0.0638574	-0.041716	-0.0839768	0.178409
157.2	1.2048	0.776336	0.422754	0.215317	0.0275658		157.2	0.22734	0.0637069	-0.0417218	-0.083868	0.178776
157.4	1.2053	0.777345	0.42334	0.215972	0.0282285		157.4	0.227177	0.0637951	-0.041617	-0.0838445	0.179253
157.6	1.20607	0.777439	0.423839	0.215763	0.0279659		157.6	0.227014	0.0634233	-0.0415795	-0.0841343	0.179385
157.8	1.20713	0.777936	0.424456	0.216169	0.0280858		157.8	0.227065	0.0636762	-0.0413947	-0.0842358	0.179786
158	1.2085	0.778817	0.424823	0.216828	0.0282187		158	0.226129	0.0632156	-0.0418469	-0.0849107	0.179567
158.2	1.20934	0.779766	0.425414	0.217065	0.0284104		158.2	0.226201	0.0628404	-0.0417584	-0.0850428	0.179814
158.4	1.20963	0.779166	0.425123	0.216716	0.0281202		158.4	0.226046	0.0621912	-0.0417473	-0.0854308	0.179933
158.6	1.21062	0.779603	0.425326	0.216719	0.0284214		158.6	0.227383	0.0627358	-0.0410781	-0.0851298	0.180504
158.8	1.21144	0.780203	0.425666	0.217252	0.0285641		158.8	0.22781	0.0630689	-0.0406629	-0.0849244	0.180835
159	1.21199	0.780415	0.426115	0.217561	0.0282825		159	0.228301	0.0632555	-0.0403547	-0.0848143	0.18131
159.2	1.21314	0.781449	0.427202	0.218213	0.0287758		159.2	0.228561	0.0626163	-0.0402927	-0.0852376	0.181071
159.4	1.21388	0.781841	0.427535	0.218455	0.0291946		159.4	0.228807	0.0625554	-0.0399136	-0.0854622	0.181046
159.6	1.21376	0.781868	0.427975	0.218474	0.0289485		159.6	0.22908	0.062726	-0.0397267	-0.0848842	0.181371
159.8	1.21458	0.781806	0.427748	0.218353	0.0285597		159.8	0.229431	0.062662	-0.0392681	-0.0845063	0.181982
160	1.21535	0.782444	0.42823	0.218768	0.0286524		160	0.229263	0.0628783	-0.039815	-0.0842865	0.181978
160.2	1.21657	0.783391	0.428924	0.219701	0.0293749		160.2	0.229527	0.0631378	-0.0399011	-0.0838723	0.182235
160.4	1.21682	0.783612	0.429138	0.219962	0.0298565		160.4	0.229447	0.0633182	-0.0399892	-0.0842728	0.182096
160.6	1.21706	0.78372	0.428961	0.220171	0.0296106		160.6	0.229507	0.0629354	-0.0401784	-0.0846176	0.182017
160.8	1.2175	0.784031	0.429354	0.220485	0.0295345		160.8	0.229328	0.0630816	-0.0404827	-0.0852111	0.181728
161	1.21753	0.784383	0.42946	0.22061	0.0292779		161	0.228831	0.0622918	-0.0412063	-0.0859632	0.181197
161.2	1.21754	0.78453	0.429812	0.220835	0.0289944		161.2	0.228817	0.0619999	-0.0415921	-0.0863032	0.181304
161.4	1.21799	0.785607	0.430549	0.221333	0.0294142		161.4	0.22852	0.0621532	-0.0416832	-0.0864255	0.181008
161.6	1.21847	0.785541	0.430578	0.221199	0.0286065		161.6	0.22826	0.0618575	-0.0426098	-0.0871574	0.180339
161.8	1.21928	0.786393	0.430928	0.221697	0.0284559		161.8	0.228271	0.0619839	-0.0430463	-0.0872999	0.180289
162	1.22009	0.786802	0.430786	0.221895	0.0287486		162	0.227627	0.0619486	-0.0434575	-0.0877789	0.179824
162.2	1.22016	0.787053	0.430743	0.221733	0.0281856		162.2	0.227597	0.0611506	-0.0435843	-0.088253	0.179539
162.4	1.22102	0.787504	0.430853	0.221396	0.0280009		162.4	0.227064	0.0608028	-0.0439143	-0.0888629	0.179474
162.6	1.22153	0.788284	0.431096	0.221737	0.0278631		162.6	0.227186	0.0610026	-0.0437446	-0.0886013	0.179587
162.8	1.22221	0.788481	0.431058	0.221519	0.0273116		162.8	0.227259	0.0605912	-0.0437062	-0.0881418	0.179663
163	1.22293	0.789366	0.431088	0.221744	0.0273781		163	0.227376	0.0606047	-0.0438106	-0.0881614	0.179689
163.2	1.22357	0.789805	0.430937	0.221293	0.0276409		163.2	0.227823	0.0607218	-0.043468	-0.0880227	0.17943
163.4	1.22489	0.790168	0.430786	0.220862	0.0278261		163.4	0.227704	0.0609011	-0.0433074	-0.0879281	0.17944
163.6	1.22538	0.790087	0.430549	0.220526	0.0276852		163.6	0.227276	0.0604593	-0.0436074	-0.0877958	0.179336
163.8	1.22599	0.790763	0.430276	0.22037	0.0279807		163.8	0.227602	0.0604666	-0.0436893	-0.0876317	0.17964
164	1.22704	0.791393	0.43074	0.220407	0.0283445		164	0.227707	0.0608863	-0.0437679	-0.0878258	0.179354
164.2	1.22775	0.79201	0.431249	0.220577	0.0287159		164.2	0.227929	0.0612182	-0.0435974	-0.0877209	0.179553
164.4	1.22824	0.792133	0.431203	0.220249	0.0288848		164.4	0.227658	0.0610748	-0.0439731	-0.088556	0.179476
164.6	1.2292	0.792187	0.431287	0.220112	0.0287464		164.6	0.227482	0.060893	-0.0440589	-0.0889529	0.179434
164.8	1.23025	0.792997	0.43218	0.220454	0.0292019		164.8	0.227264	0.0606772	-0.0441817	-0.0896825	0.178801
165	1.23016	0.793284	0.43292	0.22069	0.0294225		165	0.227553	0.0608171	-0.0440224	-0.0901486	0.179147
165.2	1.23112	0.793714	0.433963	0.221261	0.0301097		165.2	0.22789	0.0617055	-0.0440393	-0.0902052	0.180196
165.4	1.23227	0.794484	0.434621	0.221505	0.0303272		165.4	0.228454	0.0619584	-0.0437212	-0.0903597	0.180275
165.6	1.23284	0.794288	0.434492	0.221357	0.0295221		165.6	0.228775	0.0620013	-0.0442002	-0.0907925	0.180565
165.8	1.23394	0.795678	0.435481	0.222448	0.0305835		165.8	0.228928	0.0619816	-0.0443787	-0.0909783	0.1812
166	1.23435	0.796228	0.435672	0.222632	0.0307625		166	0.228892	0.0618072	-0.0445305	-0.0913812	0.181343
166.2	1.23452	0.796499	0.435687	0.222648	0.0304358		166.2	0.228849	0.0610644	-0.0446048	-0.0915476	0.18124
166.4	1.23505	0.796724	0.435835	0.222473	0.0305867		166.4	0.229085	0.0611268	-0.0447767	-0.0916187	0.18188
166.6	1.23496	0.796507	0.435722	0.222759	0.0301601		166.6	0.229356	0.0614738	-0.0446818	-0.0912219	0.182037
166.8	1.23554	0.796536	0.435222	0.222482	0.0295606		166.8	0.229851	0.0611591	-0.0447371	-0.0911615	0.18193
167	1.23586	0.796766	0.434851	0.222549	0.0295965		167	0.229957	0.0616289	-0.0445428	-0.0913761	0.182132
167.2	1.23633	0.796858	0.434841	0.222835	0.0293631		167.2	0.230073	0.0613427	-0.0447569	-0.0914762	0.18181
167.4	1.23666	0.797113	0.435168	0.223184	0.0292756		167.4	0.229956	0.0604182	-0.0449318	-0.0919416	0.181607
167.6	1.23662	0.796589	0.435074	0.223009	0.0288731		167.6	0.230452	0.0602915	-0.0447067	-0.0916803	0.181576
167.8	1.23684	0.797476	0.435177	0.223257	0.0289757		167.8	0.230792	0.0603353	-0.0446404	-0.0914727	0.181486
168	1.23734	0.797529	0.435135	0.223489	0.0285205		168	0.230683	0.0603112	-0.04447	-0.0910876	0.181729
168.2	1.23763	0.797987	0.435485	0.223769	0.0281837		168.2	0.230229	0.0600169	-0.0445137	-0.090886	0.181745
168.4	1.23827	0.797918	0.435319	0.223961	0.0278552		168.4	0.229819	0.0600216	-0.0444127	-0.0910243	0.181432
168.6	1.23851	0.798362	0.435408	0.224261	0.0280017		168.6	0.229247	0.0597983	-0.043919	-0.0911097	0.180806
168.8	1.2393	0.799916	0.436356	0.225149	0.0282087		168.8	0.228954	0.0597734	-0.0440919	-0.0913491	0.180271
169	1.23995	0.800821	0.437616	0.225961	0.0284821		169	0.229289	0.0601396	-0.04401	-0.0907769	0.180708
169.2	1.24115	0.801648	0.438018	0.226458	0.0288665		169.2	0.228888	0.0599958	-0.0448306	-0.0909324	0.180566
169.4	1.24155	0.802147	0.438152	0.226178	0.0283202		169.4	0.228772	0.0597084	-0.0450264	-0.0911293	0.180117
169.6	1.24198	0.803011	0.438383	0.226631	0.0284226		169.6	0.228505	0.0593592	-0.0460462	-0.0915722	0.179578
169.8	1.24275	0.80431	0.439253	0.227635	0.0292657		169.8	0.228275	0.0596451	-0.0464098	-0.0916256	0.179545
170	1.2425	0.804177	0.438948	0.227237	0.0290648		170	0.229009	0.0601387	-0.0460465	-0.0917534	0.179164
170.2	1.2432	0.803946	0.439126	0.227135	0.0289007		170.2	0.228545	0.0600533	-0.0463025	-0.0917376	0.178716
170.4	1.24345	0.803434	0.439302	0.226838	0.0288288		170.4	0.228664	0.059825	-0.0466778	-0.0921666	0.178789
170.6	1.24412	0.803759	0.439615	0.227251	0.029		170.6	0.228637	0.0596303	-0.0469397	-0.092785	0.178126
170.8	1.24489	0.804001	0.43971	0.227335	0.0292547		170.8	0.229073	0.0593541	-0.0470671	-0.0932302	0.177914
171	1.24537	0.804602	0.440176	0.227793	0.0294636		171	0.229085	0.0594706	-0.0471952	-0.093377	0.178452
171.2	1.24581	0.80496	0.440087	0.227843	0.0295026		171.2	0.22934	0.0590001	-0.0475509	-0.0934456	0.178347
171.4	1.2459	0.804127	0.439683	0.227449	0.029002		171.4	0.229364	0.0583451	-0.0476566	-0.0937742	0.178217
171.6	1.24652	0.804004	0.439291	0.226888	0.0291254		171.6	0.229356	0.0584797	-0.0475412	-0.0935627	0.178482
171.8	1.24692	0.804496	0.438977	0.22674	0.0291426		171.8	0.229147	0.058471	-0.0476418	-0.0934858	0.179042
172	1.24755	0.804492	0.438803	0.226295	0.0288961		172	0.229438	0.0586436	-0.0472438	-0.0931842	0.179679
172.2	1.24778	0.804776	0.43876	0.22619	0.0288234		172.2	0.229431	0.0590504	-0.0465633	-0.0929266	0.17968
172.4	1.24868	0.804861	0.438748	0.226193	0.0284406		172.4	0.229678	0.0595532	-0.0462513	-0.0926974	0.179789
172.6	1.24937	0.805724	0.438779	0.226739	0.0284773		172.6	0.229825	0.0593385	-0.0460496	-0.0927715	0.179669
172.8	1.25065	0.806464	0.439661	0.22734	0.0285923		172.8	0.229629	0.0590156	-0.0467096	-0.0932172	0.179388
173	1.2512	0.806796	0.439976	0.22761	0.0290377		173	0.229967	0.0594138	-0.0466436	-0.0927827	0.180214
173.2	1.25179	0.807262	0.440215	0.227602	0.0289879		173.2	0.229813	0.0596273	-0.0472145	-0.0934974	0.180323
173.4	1.25239	0.807447	0.44019	0.227402	0.0281427		173.4	0.229404	0.0593056	-0.0473034	-0.0939742	0.180237
173.6	1.25286	0.807932	0.440158	0.227885	0.0281411		173.6	0.229512	0.0592722	-0.0476052	-0.0942072	0.179711
173.8	1.25336	0.808323	0.440384	0.228092	0.0281965		173.8	0.229183	0.0592023	-0.0470505	-0.0945763	0.179726
174	1.25329	0.808405	0.440028	0.227875	0.0278324		174	0.229683	0.0591511	-0.0466077	-0.0947048	0.179874
174.2	1.25446	0.809046	0.440658	0.228164	0.0281991		174.2	0.228627	0.0583006	-0.0473371	-0.095015	0.179495
174.4	1.25459	0.809117	0.441107	0.228299	0.0282234		174.4	0.228836	0.0579393	-0.0473081	-0.0951928	0.179622
174.6	1.25507	0.809433	0.441751	0.228935	0.0283126		174.6	0.228763	0.0578948	-0.0473731	-0.0953138	0.179271
174.8	1.25615	0.810318	0.442421	0.229347	0.0285594		174.8	0.228183	0.0574177	-0.0478649	-0.0954198	0.179217
175	1.257	0.810579	0.442709	0.229283	0.0282937		175	0.228323	0.057292	-0.0477851	-0.0948873	0.180096
175.2	1.25756	0.810661	0.442822	0.22899	0.0283313		175.2	0.228117	0.0567149	-0.0483341	-0.0951803	0.179996
175.4	1.25823	0.81081	0.443409	0.229308	0.0284523		175.4	0.227869	0.0567391	-0.048321	-0.0952368	0.180125
175.6	1.25872	0.811732	0.443934	0.229381	0.0293262		175.6	0.227766	0.057457	-0.0482042	-0.0949931	0.180623
175.8	1.25909	0.811899	0.444598	0.229189	0.0294217		175.8	0.228165	0.0575664	-0.047921	-0.0949385	0.180728
176	1.25976	0.812453	0.445102	0.229565	0.0297851		176	0.228861	0.0583386	-0.0476744	-0.0947624	0.18097
176.2	1.2605	0.812821	0.445732	0.229895	0.0301268		176.2	0.229094	0.05887	-0.047414	-0.0946753	0.181099
176.4	1.26141	0.813273	0.446315	0.230427	0.0301167		176.4	0.229512	0.0590668	-0.0475316	-0.0950696	0.181
176.6	1.26168	0.81342	0.446361	0.230932	0.0303607		176.6	0.229339	0.0587314	-0.0477295	-0.0958166	0.180796
176.8	1.26272	0.813917	0.447109	0.231607	0.0308908		176.8	0.22962	0.0592988	-0.0479883	-0.0963399	0.180956
177	1.2635	0.814683	0.447084	0.231451	0.0312357		177	0.230066	0.0599738	-0.0474955	-0.0961947	0.181746
177.2	1.2642	0.815397	0.44707	0.231238	0.0306771		177.2	0.229962	0.0598429	-0.0479934	-0.0968915	0.181102
177.4	1.26468	0.815388	0.446745	0.231104	0.0304467		177.4	0.229807	0.0596659	-0.0482136	-0.0971223	0.180867
177.6	1.26498	0.815982	0.446754	0.230807	0.0305176		177.6	0.229847	0.0594592	-0.0484265	-0.0971766	0.180916
177.8	1.26567	0.816757	0.446689	0.230828	0.0305792		177.8	0.229667	0.0593462	-0.0484187	-0.0975162	0.180832
178	1.26602	0.817052	0.446911	0.230667	0.0301274		178	0.229812	0.0595046	-0.0485715	-0.0971963	0.181447
178.2	1.26674	0.817257	0.447455	0.230499	0.0300142		178.2	0.229513	0.0589586	-0.0490392	-0.0972567	0.181225
178.4	1.26723	0.817366	0.447837	0.230194	0.0293328		178.4	0.229559	0.0588043	-0.0493326	-0.0968627	0.181475
178.6	1.26776	0.817496	0.448138	0.230294	0.0288731		178.6	0.229751	0.0586994	-0.0493097	-0.0964994	0.181626
178.8	1.26874	0.818489	0.447976	0.229836	0.028604		178.8	0.230195	0.0587324	-0.0490328	-0.0955853	0.182497
179	1.269	0.818483	0.447992	0.229322	0.0281389		179	0.230726	0.0585359	-0.0487397	-0.0952498	0.182744
179.2	1.26865	0.818654	0.447843	0.228688	0.0274729		179.2	0.230547	0.0584586	-0.0489262	-0.0953343	0.182486
179.4	1.26934	0.819634	0.448206	0.228959	0.0279433		179.4	0.230856	0.058844	-0.0488595	-0.0948274	0.182604
179.6	1.26964	0.820144	0.448165	0.228749	0.0280014		179.6	0.230378	0.0584094	-0.0495249	-0.0950949	0.182274
179.8	1.27006	0.820388	0.448542	0.228556	0.0280661		179.8	0.230221	0.0581962	-0.0495494	-0.0951169	0.181855
180	1.26979	0.820557	0.448389	0.228572	0.0279266		180	0.230293	0.0589174	-0.0495639	-0.0948744	0.182132
180.2	1.27005	0.820402	0.448838	0.228966	0.0283784		180.2	0.230013	0.0583107	-0.0498451	-0.0952204	0.181386
180.4	1.27059	0.821071	0.449156	0.229456	0.0283938		180.4	0.22991	0.0579979	-0.049948	-0.0957606	0.181065
180.6	1.27176	0.821391	0.449621	0.23028	0.02867		180.6	0.229438	0.0577246	-0.0505662	-0.0966903	0.180326
180.8	1.27247	0.821764	0.450059	0.230579	0.028895		180.8	0.229614	0.0579471	-0.0507366	-0.0969072	0.180382
181	1.27312	0.822319	0.449984	0.230603	0.0290191		181	0.229376	0.0573483	-0.0511108	-0.0974086	0.17987
181.2	1.27358	0.822519	0.450439	0.231348	0.0295444		181.2	0.229414	0.057297	-0.0514374	-0.0978178	0.179842
181.4	1.27352	0.822027	0.450008	0.231544	0.0295111		181.4	0.229587	0.0570396	-0.0519163	-0.0981561	0.180232
181.6	1.27334	0.822312	0.449824	0.231407	0.0288996		181.6	0.229624	0.056805	-0.0518486	-0.0981207	0.180596
181.8	1.27439	0.82225	0.449935	0.231654	0.0289178		181.8	0.230042	0.0572541	-0.0515271	-0.0984487	0.181041
182	1.27481	0.822249	0.45057	0.232104	0.0288803		182	0.229821	0.0568752	-0.0518296	-0.098741	0.181223
182.2	1.27627	0.823126	0.451397	0.233073	0.0294783		182.2	0.230097	0.0566714	-0.0516202	-0.0985429	0.181525
182.4	1.27688	0.823522	0.451612	0.233239	0.0293562		182.4	0.230026	0.056659	-0.0520261	-0.0985075	0.181073
182.6	1.27774	0.824323	0.451936	0.234009	0.0296313		182.6	0.230552	0.0568102	-0.051755	-0.0986438	0.181059
182.8	1.27836	0.824935	0.451696	0.233608	0.0297651		182.8	0.230617	0.0569686	-0.0514027	-0.0984968	0.181431
183	1.27885	0.825046	0.451798	0.233541	0.0295149		183	0.230324	0.0567983	-0.0516675	-0.0993096	0.180926
183.2	1.27897	0.825148	0.451544	0.233084	0.0289771		183.2	0.230319	0.0570133	-0.0514412	-0.0994261	0.181356
183.4	1.28062	0.826261	0.452537	0.234063	0.0300416		183.4	0.230026	0.0572076	-0.0515338	-0.0995814	0.181395
183.6	1.28053	0.82622	0.452546	0.233355	0.0297155		183.6	0.230053	0.0575998	-0.051679	-0.0994885	0.181539
183.8	1.28084	0.826546	0.452978	0.233088	0.0300012		183.8	0.230533	0.0582039	-0.0508469	-0.0989094	0.181684
184	1.28081	0.82669	0.453064	0.233351	0.0297063		184	0.230107	0.0581839	-0.0514163	-0.0994952	0.181527
184.2	1.2817	0.827137	0.453576	0.233913	0.0300297		184.2	0.229482	0.0573858	-0.05169	-0.10031	0.180879
184.4	1.28298	0.827979	0.453974	0.234355	0.0298072		184.4	0.229671	0.0574918	-0.0515897	-0.10083	0.181444
184.6	1.28339	0.827704	0.453903	0.234493	0.0293077		184.6	0.229616	0.0573143	-0.0521456	-0.101375	0.181156
184.8	1.28299	0.827552	0.453759	0.234603	0.0290526		184.8	0.229656	0.0570852	-0.0518007	-0.101339	0.181616
185	1.28393	0.827998	0.454316	0.235084	0.0294232		185	0.229624	0.0565118	-0.0519585	-0.101509	0.181612
185.2	1.28378	0.828103	0.454159	0.235072	0.0290837		185.2	0.229881	0.0563583	-0.0520198	-0.101861	0.181689
185.4	1.28393	0.828128	0.453552	0.234636	0.0282401		185.4	0.229845	0.05613	-0.0524536	-0.10181	0.181634
185.6	1.28427	0.828343	0.45371	0.234249	0.02785		185.6	0.229674	0.0560386	-0.0525706	-0.101795	0.181467
185.8	1.28573	0.828727	0.454875	0.234986	0.0285594		185.8	0.229942	0.0564006	-0.0524405	-0.101729	0.181846
186	1.28633	0.829369	0.455249	0.235233	0.0287393		186	0.229473	0.0559794	-0.0528262	-0.10162	0.181556
186.2	1.28778	0.830393	0.456059	0.235943	0.0291649		186.2	0.229505	0.0561371	-0.0525695	-0.101211	0.181649
186.4	1.28818	0.830559	0.456388	0.235776	0.02921		186.4	0.228915	0.0556778	-0.0532842	-0.101586	0.180533
186.6	1.28883	0.830968	0.4563	0.235556	0.0290981		186.6	0.228997	0.0558467	-0.0531877	-0.101749	0.180988
186.8	1.28928	0.831237	0.456304	0.235327	0.0287808		186.8	0.228864	0.0559861	-0.0533017	-0.101329	0.181218
187	1.28976	0.8314	0.456238	0.23543	0.0287859		187	0.228845	0.0560223	-0.0533928	-0.101313	0.18093
187.2	1.29037	0.831633	0.456662	0.23573	0.0294954		187.2	0.228888	0.0560816	-0.0536244	-0.101239	0.180775
187.4	1.29121	0.832191	0.45693	0.235834	0.0299194		187.4	0.229429	0.0567708	-0.0531625	-0.100503	0.181058
187.6	1.2911	0.832072	0.456331	0.234806	0.0293441		187.6	0.229998	0.0571223	-0.0528423	-0.100151	0.181097
187.8	1.29166	0.832759	0.45649	0.235446	0.0292251		187.8	0.229963	0.0570265	-0.0525668	-0.100273	0.181051
188	1.29169	0.832988	0.456282	0.235729	0.0290919		188	0.229282	0.0565761	-0.0531171	-0.100698	0.180892
188.2	1.29198	0.833063	0.456335	0.235967	0.0288808		188.2	0.229409	0.0564867	-0.052794	-0.100594	0.181087
188.4	1.29183	0.833114	0.456011	0.235818	0.0279721		188.4	0.22962	0.0566081	-0.0530135	-0.100832	0.181335
188.6	1.29161	0.832981	0.455965	0.235776	0.0276296		188.6	0.229554	0.0563893	-0.0531829	-0.100776	0.181168
188.8	1.29183	0.833181	0.456183	0.236347	0.0276277		188.8	0.229355	0.0556186	-0.0532782	-0.101064	0.180725
189	1.29224	0.833666	0.456196	0.236299	0.02754		189	0.229191	0.0553376	-0.0538515	-0.101533	0.180595
189.2	1.29244	0.834396	0.456222	0.236441	0.0273741		189.2	0.229028	0.0550277	-0.0544367	-0.102297	0.180439
189.4	1.29307	0.834821	0.456788	0.236798	0.0276543		189.4	0.229059	0.0550166	-0.0546487	-0.102688	0.180633
189.6	1.29347	0.835198	0.457527	0.237099	0.028105		189.6	0.229341	0.0552077	-0.0542758	-0.103209	0.180884
189.8	1.29449	0.835868	0.45858	0.237748	0.0282154		189.8	0.229762	0.0557943	-0.053587	-0.10292	0.181677
190	1.29478	0.836712	0.458666	0.237746	0.028146		190	0.22965	0.0558481	-0.0535972	-0.10292	0.181728
190.2	1.29594	0.83762	0.459309	0.238668	0.0286719		190.2	0.229506	0.0553123	-0.053878	-0.103442	0.181353
190.4	1.29653	0.838059	0.459553	0.238703	0.028753		190.4	0.229132	0.0546862	-0.0543446	-0.104098	0.181205
190.6	1.29732	0.838704	0.459768	0.238816	0.0286985		190.6	0.229003	0.0541863	-0.0549167	-0.104648	0.181275
190.8	1.29808	0.839634	0.460851	0.239601	0.0292132		190.8	0.228977	0.0536772	-0.0550165	-0.10514	0.180996
191	1.29913	0.840192	0.461428	0.24004	0.0301361		191	0.228965	0.0533648	-0.0548239	-0.105489	0.181125
191.2	1.30047	0.84053	0.462362	0.240364	0.0310122		191.2	0.228953	0.0531277	-0.0554569	-0.105652	0.181139
191.4	1.30113	0.841034	0.462835	0.239892	0.0308033		191.4	0.228962	0.0531618	-0.0550301	-0.105325	0.181148
191.6	1.30176	0.841027	0.463468	0.239937	0.0309476		191.6	0.228981	0.0533679	-0.0552298	-0.105106	0.181016
191.8	1.3025	0.841342	0.46394	0.240616	0.0309729		191.8	0.229596	0.0534424	-0.0553881	-0.104545	0.181194
192	1.3028	0.841102	0.464131	0.239882	0.0308855		192	0.229627	0.0533583	-0.0553823	-0.104156	0.180962
192.2	1.30334	0.841403	0.464464	0.239654	0.03072		192.2	0.230283	0.053981	-0.0554291	-0.103795	0.18132
192.4	1.3032	0.84152	0.464416	0.239271	0.0300664		192.4	0.230566	0.0542986	-0.0555243	-0.103278	0.181116
192.6	1.30411	0.841486	0.464775	0.239555	0.0302122		192.6	0.230691	0.0543508	-0.0555557	-0.10308	0.181164
192.8	1.30452	0.841739	0.464418	0.239687	0.0301932		192.8	0.230926	0.0545072	-0.0554849	-0.103119	0.181203
193	1.30495	0.842307	0.464435	0.239502	0.0303204		193	0.231036	0.0549182	-0.0555302	-0.102834	0.18173
193.2	1.30536	0.842863	0.464874	0.240039	0.0304372		193.2	0.231586	0.0553244	-0.0551447	-0.102788	0.182248
193.4	1.30567	0.843197	0.465193	0.240645	0.0303697		193.4	0.232271	0.0558335	-0.0545572	-0.102596	0.182773
193.6	1.30574	0.842911	0.465136	0.24024	0.0303019		193.6	0.232199	0.056382	-0.0540877	-0.1028	0.182681
193.8	1.30555	0.842951	0.464436	0.239651	0.0296613		193.8	0.231811	0.056477	-0.0540827	-0.102956	0.182744
194	1.30599	0.84294	0.46377	0.239875	0.0293004		194	0.231281	0.055686	-0.0545493	-0.103915	0.18241
194.2	1.30654	0.842829	0.463692	0.240146	0.029443		194.2	0.230863	0.0546587	-0.0549935	-0.104989	0.181929
194.4	1.30778	0.843938	0.464823	0.240792	0.0301939		194.4	0.23001	0.0542279	-0.0555408	-0.106013	0.181524
194.6	1.30794	0.844464	0.465087	0.241053	0.0298777		194.6	0.229407	0.0534883	-0.0560338	-0.106788	0.181325
194.8	1.30864	0.844956	0.465515	0.241677	0.030373		194.8	0.228494	0.05287	-0.0565416	-0.107855	0.181014
195	1.30963	0.845346	0.465108	0.242173	0.0306099		195	0.227981	0.0527409	-0.0570425	-0.1082	0.181148
195.2	1.31049	0.845623	0.465626	0.242479	0.0307308		195.2	0.228143	0.0529917	-0.057345	-0.108211	0.180986
195.4	1.31033	0.845873	0.465813	0.242449	0.0306114		195.4	0.22828	0.053115	-0.0569614	-0.108179	0.180704
195.6	1.31086	0.845697	0.46551	0.242823	0.0301426		195.6	0.228914	0.0530497	-0.0569298	-0.10799	0.180747
195.8	1.31142	0.846181	0.465462	0.242806	0.0297221		195.8	0.229406	0.0531014	-0.0568522	-0.107702	0.180745
196	1.31189	0.846878	0.465466	0.242588	0.0297863		196	0.229471	0.0532848	-0.0568635	-0.107538	0.1807
196.2	1.31272	0.848185	0.4658	0.242762	0.0299099		196.2	0.229475	0.0536314	-0.0571568	-0.107324	0.181177
196.4	1.31327	0.848533	0.465976	0.243354	0.0297417		196.4	0.229148	0.0539153	-0.0572586	-0.106861	0.181291
196.6	1.31389	0.848441	0.466191	0.24306	0.0294807		196.6	0.22919	0.053872	-0.0572106	-0.106736	0.181858
196.8	1.31367	0.848772	0.465766	0.242486	0.0289733		196.8	0.22956	0.0544018	-0.0567793	-0.106115	0.182409
197	1.31445	0.849463	0.466264	0.242546	0.0292841		197	0.229893	0.0543466	-0.0569703	-0.105578	0.182819
197.2	1.31475	0.850203	0.466835	0.242629	0.0292241		197.2	0.229802	0.0542478	-0.0568866	-0.105569	0.182788
197.4	1.31483	0.850302	0.467109	0.242314	0.0293295		197.4	0.229616	0.0541187	-0.0570566	-0.105739	0.182738
197.6	1.31427	0.849534	0.466771	0.241099	0.0290432		197.6	0.229374	0.053807	-0.0571686	-0.105965	0.182716
197.8	1.3148	0.85016	0.467236	0.241533	0.0294715		197.8	0.229217	0.0535588	-0.0573183	-0.10619	0.182625
198	1.31583	0.850081	0.467772	0.242267	0.0297354		198	0.229412	0.0529476	-0.0575657	-0.106719	0.182601
198.2	1.31642	0.850786	0.46834	0.242527	0.0303511		198.2	0.229613	0.0526308	-0.0578865	-0.107418	0.182157
198.4	1.31795	0.851868	0.469209	0.242828	0.0309837		198.4	0.229183	0.0519915	-0.058541	-0.108054	0.181308
198.6	1.31751	0.8516	0.46867	0.242486	0.0299598		198.6	0.229089	0.0519922	-0.0585402	-0.108307	0.181264
198.8	1.3183	0.851908	0.468973	0.243178	0.0304548		198.8	0.228826	0.0517015	-0.0586669	-0.109024	0.180726
199	1.31848	0.851676	0.468815	0.243364	0.0298949		199	0.229383	0.0519582	-0.0581612	-0.109234	0.180631
199.2	1.31838	0.851824	0.469244	0.24325	0.0294549		199.2	0.230278	0.0522335	-0.057583	-0.109192	0.180816
199.4	1.31893	0.85191	0.469435	0.24342	0.0290982		199.4	0.230698	0.0516858	-0.0573972	-0.109314	0.180328
199.6	1.31997	0.852053	0.469657	0.243485	0.0285579		199.6	0.231454	0.051597	-0.05725	-0.109204	0.180409
199.8	1.32082	0.853089	0.470251	0.243664	0.028839		199.8	0.231441	0.0520601	-0.0573911	-0.108702	0.180973
200	1.32195	0.853544	0.470616	0.244085	0.0290038		200	0.231096	0.052019	-0.0575752	-0.108922	0.181111
200.2	1.32258	0.854296	0.471014	0.244416	0.0287913		200.2	0.230939	0.0518633	-0.0575845	-0.108805	0.181342
200.4	1.32275	0.854088	0.471133	0.244773	0.0285844		200.4	0.231387	0.0518788	-0.0576026	-0.108137	0.181965
200.6	1.32291	0.854303	0.471195	0.244628	0.0283043		200.6	0.231902	0.052197	-0.0573733	-0.107153	0.182588
200.8	1.32317	0.855129	0.471005	0.244717	0.0283043		200.8	0.231168	0.0517811	-0.057856	-0.107036	0.182529
201	1.32429	0.856144	0.471549	0.245845	0.0294407		201	0.231155	0.051507	-0.0581704	-0.106714	0.182796
201.2	1.32458	0.856845	0.471714	0.245821	0.0294464		201.2	0.23061	0.0516537	-0.0584792	-0.106684	0.18279
201.4	1.32498	0.85697	0.471335	0.246058	0.0298284		201.4	0.230618	0.0518155	-0.0586796	-0.107037	0.183371
201.6	1.3253	0.857345	0.471288	0.246554	0.0300264		201.6	0.230736	0.0518356	-0.0589129	-0.10698	0.183836
201.8	1.32553	0.857684	0.471309	0.246792	0.0302879		201.8	0.230443	0.0518005	-0.0592352	-0.107651	0.183488
202	1.32602	0.85755	0.470798	0.246476	0.0299703		202	0.2305	0.0518263	-0.0594251	-0.107954	0.183612
202.2	1.32574	0.857246	0.4698	0.245699	0.0292626		202.2	0.230529	0.0517877	-0.0593427	-0.108397	0.183275
202.4	1.32649	0.857514	0.470157	0.245489	0.0291114		202.4	0.229799	0.0514649	-0.0597917	-0.108541	0.182422
202.6	1.32625	0.857532	0.470422	0.246263	0.0289793		202.6	0.22941	0.0517153	-0.0596838	-0.109124	0.182499
202.8	1.32672	0.857946	0.47086	0.246245	0.0293043		202.8	0.229202	0.0512526	-0.0595252	-0.109777	0.181846
203	1.32676	0.857947	0.470957	0.24592	0.0287899		203	0.229107	0.051339	-0.0595471	-0.110527	0.181647
203.2	1.32731	0.858137	0.471349	0.245435	0.0286733		203.2	0.229123	0.051147	-0.0594951	-0.111064	0.181151
203.4	1.32847	0.858625	0.472138	0.24581	0.028975		203.4	0.229498	0.0509494	-0.0598311	-0.111659	0.18069
203.6	1.32911	0.858839	0.472569	0.245419	0.0288573		203.6	0.229787	0.0510607	-0.0596942	-0.111866	0.180556
203.8	1.32964	0.859337	0.473025	0.24525	0.0286486		203.8	0.229482	0.050963	-0.060017	-0.112219	0.180554
204	1.33012	0.859429	0.473477	0.245032	0.0281223		204	0.229418	0.0507088	-0.0599387	-0.112621	0.180488
204.2	1.33056	0.86026	0.47394	0.245455	0.0282145		204.2	0.23	0.0505259	-0.0598445	-0.112359	0.180508
204.4	1.33153	0.86082	0.474332	0.24566	0.0283927		204.4	0.230297	0.0506995	-0.0602137	-0.112215	0.180992
204.6	1.33275	0.861618	0.475082	0.246006	0.0285648		204.6	0.230326	0.0510779	-0.0602168	-0.11211	0.181479
204.8	1.33384	0.862093	0.475392	0.246393	0.0288576		204.8	0.229502	0.0504686	-0.0608824	-0.113114	0.181084
205	1.33501	0.862971	0.476009	0.247156	0.0294387		205	0.230243	0.0512878	-0.0604769	-0.112869	0.181781
205.2	1.33537	0.863401	0.47615	0.246941	0.0292587		205.2	0.230724	0.0524964	-0.0599843	-0.112708	0.182784
205.4	1.33579	0.863786	0.476376	0.247267	0.0292575		205.4	0.230675	0.0528191	-0.0601252	-0.112753	0.183368
205.6	1.33548	0.863915	0.47598	0.246919	0.0284477		205.6	0.230837	0.0528607	-0.0602114	-0.112474	0.183191
205.8	1.33537	0.864092	0.475881	0.247093	0.0283374		205.8	0.230618	0.0530129	-0.0602374	-0.112435	0.183252
206	1.33572	0.86387	0.475771	0.247278	0.0281807		206	0.230724	0.0531934	-0.0600868	-0.112216	0.183317
206.2	1.33566	0.863861	0.4755	0.247241	0.027868		206.2	0.230968	0.0533954	-0.0596809	-0.111553	0.184092
206.4	1.3365	0.864448	0.476425	0.247751	0.0282197		206.4	0.230481	0.0531878	-0.0605014	-0.11144	0.18372
206.6	1.33648	0.864638	0.476309	0.247951	0.028789		206.6	0.230317	0.0528662	-0.0607381	-0.111878	0.183813
206.8	1.33727	0.86506	0.476283	0.247223	0.0290093		206.8	0.230585	0.0524132	-0.0604989	-0.111865	0.183777
207	1.3372	0.864848	0.475748	0.247147	0.0288967		207	0.230334	0.052212	-0.0605529	-0.112193	0.183639
207.2	1.33754	0.864559	0.475431	0.246786	0.0287314		207.2	0.230195	0.0514796	-0.0607932	-0.112414	0.182989
207.4	1.33803	0.864648	0.475021	0.24661	0.0284819		207.4	0.230153	0.0508695	-0.0612631	-0.112952	0.182903
207.6	1.33884	0.865073	0.475009	0.246353	0.0285815		207.6	0.230227	0.0506363	-0.060988	-0.112523	0.18263
207.8	1.34014	0.865755	0.475763	0.246801	0.0287283		207.8	0.23026	0.0502669	-0.0609433	-0.112557	0.182713
208	1.34097	0.866299	0.475972	0.247202	0.0291552		208	0.230531	0.0503967	-0.0605739	-0.111858	0.183102
208.2	1.34202	0.866975	0.476299	0.247809	0.0296602		208.2	0.230822	0.0508197	-0.0602949	-0.111466	0.183599
208.4	1.34322	0.867539	0.476872	0.24809	0.0299217		208.4	0.23108	0.0512665	-0.0607826	-0.111658	0.184091
208.6	1.3438	0.868066	0.477947	0.248502	0.0298884		208.6	0.230851	0.0513833	-0.0606628	-0.111705	0.184163
208.8	1.34407	0.868287	0.478335	0.249306	0.0303493		208.8	0.23049	0.0516236	-0.0607399	-0.111976	0.184093
209	1.34443	0.869157	0.479479	0.25011	0.0304094		209	0.230903	0.0518448	-0.0606106	-0.111615	0.184596
209.2	1.3447	0.869515	0.479961	0.250476	0.0307218		209.2	0.230942	0.052513	-0.0605938	-0.111647	0.184553
209.4	1.34499	0.87001	0.480276	0.250751	0.0304824		209.4	0.230872	0.0518187	-0.0613559	-0.11208	0.183648
209.6	1.34483	0.869932	0.479863	0.250606	0.0298436		209.6	0.230222	0.0511974	-0.0618514	-0.112774	0.18281
209.8	1.34501	0.870496	0.4806	0.251476	0.0305776		209.8	0.230399	0.0513304	-0.0620201	-0.113065	0.183061
210	1.34501	0.870191	0.480646	0.251346	0.0303482		210	0.230306	0.0509391	-0.0621013	-0.113269	0.182997
210.2	1.34488	0.870507	0.480819	0.251472	0.0303484		210.2	0.230611	0.0510599	-0.0623181	-0.112894	0.18354
210.4	1.34519	0.870503	0.48123	0.251216	0.0302094		210.4	0.230375	0.0505864	-0.0631104	-0.113593	0.182671
210.6	1.34504	0.87057	0.480834	0.250787	0.0300615		210.6	0.230225	0.0498033	-0.063269	-0.114185	0.182409
210.8	1.34528	0.870708	0.480959	0.250835	0.0297003		210.8	0.230557	0.0493338	-0.062898	-0.114126	0.182426
211	1.34495	0.870008	0.480686	0.250386	0.0290327		211	0.23032	0.0492089	-0.0628202	-0.114659	0.181966
211.2	1.3451	0.869887	0.480601	0.250002	0.0284378		211.2	0.23	0.0487789	-0.0630211	-0.115108	0.181429
211.4	1.34632	0.870244	0.480808	0.25015	0.0284694		211.4	0.229994	0.0486948	-0.0631426	-0.115658	0.181397
211.6	1.34698	0.871042	0.481752	0.25091	0.0286335		211.6	0.230541	0.0490622	-0.0625677	-0.114757	0.181919
211.8	1.34792	0.871364	0.481919	0.25134	0.0284039		211.8	0.230535	0.0493033	-0.0621102	-0.115001	0.182082
212	1.34837	0.871709	0.481628	0.251711	0.0281293		212	0.230325	0.0495979	-0.0621759	-0.114797	0.182486
212.2	1.34921	0.872476	0.482257	0.252209	0.0279631		212.2	0.230458	0.0503979	-0.0620817	-0.114675	0.183187
212.4	1.35028	0.872844	0.48222	0.252177	0.0277378		212.4	0.230357	0.0506275	-0.0625802	-0.114759	0.183501
212.6	1.35125	0.873386	0.48288	0.253013	0.0277837		212.6	0.229862	0.0504539	-0.0624672	-0.11484	0.183322
212.8	1.35221	0.873569	0.483371	0.253672	0.0280884		212.8	0.22987	0.0504163	-0.0624779	-0.114836	0.183446
213	1.35372	0.874262	0.483681	0.253938	0.0283219		213	0.230203	0.0506016	-0.0624403	-0.11419	0.183758
213.2	1.35486	0.875109	0.483501	0.254058	0.0287111		213.2	0.230391	0.0506808	-0.0625902	-0.114505	0.1837
213.4	1.35544	0.875472	0.483233	0.253697	0.0282704		213.4	0.23047	0.0501854	-0.0631374	-0.114699	0.183203
213.6	1.35592	0.875638	0.482904	0.253318	0.0281255		213.6	0.229978	0.0503914	-0.0632231	-0.114534	0.183579
213.8	1.35653	0.876272	0.483262	0.253705	0.0288318		213.8	0.230458	0.0504764	-0.0633071	-0.11448	0.183526
214	1.35736	0.876282	0.483285	0.25394	0.0285903		214	0.230374	0.0502292	-0.0635242	-0.114656	0.183572
214.2	1.3576	0.876444	0.483275	0.254088	0.0285938		214.2	0.230723	0.0499615	-0.0639764	-0.114882	0.183161
214.4	1.35774	0.876522	0.483462	0.254091	0.0288185		214.4	0.230968	0.0499287	-0.0639922	-0.114571	0.182893
214.6	1.35796	0.876329	0.483284	0.254131	0.0291248		214.6	0.231806	0.0499797	-0.0635316	-0.114031	0.18324
214.8	1.3583	0.876517	0.483784	0.254082	0.0296526		214.8	0.232147	0.0497686	-0.0634905	-0.114211	0.183119
215	1.35815	0.876126	0.484294	0.253677	0.0292323		215	0.231701	0.0497969	-0.0635159	-0.114696	0.182891
215.2	1.35861	0.876609	0.484712	0.254048	0.0292163		215.2	0.23189	0.0497861	-0.0631707	-0.114451	0.182944
215.4	1.35923	0.876773	0.485194	0.25436	0.0289004		215.4	0.232015	0.0492795	-0.0635699	-0.114809	0.182671
215.6	1.35961	0.877787	0.486	0.255101	0.0293749		215.6	0.231985	0.0495184	-0.0633265	-0.114493	0.182596
215.8	1.36011	0.877857	0.485981	0.255184	0.029358		215.8	0.231898	0.04996	-0.0630249	-0.114915	0.182321
216	1.36105	0.87838	0.486794	0.256163	0.0295877		216	0.231545	0.0499919	-0.0632204	-0.114978	0.182385
216.2	1.36198	0.879022	0.487455	0.256676	0.0300808		216.2	0.231326	0.050233	-0.0632566	-0.115073	0.18254
216.4	1.3628	0.879161	0.487576	0.256912	0.0304946		216.4	0.231021	0.0503375	-0.0633675	-0.115072	0.182296
216.6	1.36347	0.879894	0.488418	0.257618	0.0306983		216.6	0.231231	0.0503923	-0.0633468	-0.11497	0.182349
216.8	1.36399	0.880296	0.488842	0.257311	0.030915		216.8	0.231312	0.0504772	-0.063223	-0.114837	0.182692
217	1.36467	0.881259	0.48921	0.257695	0.0315128		217	0.231766	0.0507063	-0.0630648	-0.114455	0.183422
217.2	1.36507	0.882136	0.489232	0.257444	0.0315095		217.2	0.231488	0.0499766	-0.0634991	-0.115337	0.182796
217.4	1.36539	0.882603	0.489249	0.256812	0.0316285		217.4	0.231112	0.0500486	-0.0637146	-0.115478	0.182616
217.6	1.36541	0.882155	0.488509	0.256174	0.0311216		217.6	0.231063	0.0499503	-0.06365	-0.116096	0.182905
217.8	1.36523	0.882231	0.488166	0.256393	0.0311524		217.8	0.231228	0.0494921	-0.063966	-0.117117	0.182663
218	1.36615	0.882821	0.488331	0.256198	0.0315844		218	0.230996	0.0488129	-0.0643061	-0.118055	0.182738
218.2	1.36597	0.882987	0.487883	0.255778	0.031712		218.2	0.230671	0.048488	-0.0645983	-0.11833	0.182615
218.4	1.36577	0.882826	0.487643	0.255442	0.0318616		218.4	0.230786	0.0486281	-0.0646617	-0.118183	0.183001
218.6	1.36618	0.882864	0.487679	0.254923	0.0315019		218.6	0.230914	0.0485304	-0.0649286	-0.118596	0.182776
218.8	1.36601	0.883271	0.488082	0.254737	0.0312534		218.8	0.230626	0.0482761	-0.0651867	-0.118895	0.182749
219	1.36604	0.883247	0.488066	0.254562	0.0302166		219	0.230198	0.0478755	-0.0653388	-0.119125	0.182719
219.2	1.36676	0.883845	0.488375	0.254772	0.0302909		219.2	0.230087	0.0474647	-0.0661361	-0.119354	0.181949
219.4	1.36736	0.883992	0.488471	0.25434	0.0297256		219.4	0.229436	0.0469365	-0.0669241	-0.119881	0.180973
219.6	1.36745	0.884022	0.48866	0.254337	0.0295746		219.6	0.229617	0.0476687	-0.0665434	-0.119461	0.18131
219.8	1.36812	0.883594	0.488937	0.254285	0.028904		219.8	0.229598	0.0480598	-0.0668786	-0.119504	0.181352
220	1.36866	0.884161	0.489283	0.254685	0.0289599		220	0.229473	0.0479457	-0.0672104	-0.11903	0.181378
220.2	1.36902	0.884324	0.489456	0.254772	0.02874		220.2	0.229421	0.04816	-0.0675427	-0.118477	0.181074
220.4	1.36916	0.884498	0.489717	0.254868	0.0283573		220.4	0.229814	0.0486765	-0.0677041	-0.118106	0.181163
220.6	1.36935	0.884661	0.489789	0.255122	0.0281945		220.6	0.230235	0.0486123	-0.0675909	-0.117715	0.181528
220.8	1.36983	0.885124	0.490314	0.255933	0.028537		220.8	0.230788	0.0485991	-0.0672876	-0.11755	0.181741
221	1.37071	0.885727	0.490648	0.256721	0.0290444		221	0.231184	0.0482403	-0.0671299	-0.117384	0.18184
221.2	1.37106	0.88574	0.490356	0.256977	0.0288027		221.2	0.23075	0.0478349	-0.0674725	-0.118018	0.18123
221.4	1.37192	0.885777	0.490183	0.257533	0.0287867		221.4	0.231194	0.0480395	-0.0673249	-0.118134	0.181417
221.6	1.37232	0.885633	0.489799	0.257768	0.0282545		221.6	0.231542	0.0484561	-0.0669184	-0.118392	0.181934
221.8	1.37318	0.886286	0.490172	0.258504	0.0288137		221.8	0.231592	0.0482969	-0.0665849	-0.11832	0.182021
222	1.37425	0.8869	0.490652	0.259113	0.0293166		222	0.231725	0.0484607	-0.0664699	-0.118574	0.182388
222.2	1.37572	0.887358	0.491223	0.260079	0.0295753		222.2	0.231975	0.048896	-0.0661654	-0.118554	0.182878
222.4	1.37657	0.887783	0.492057	0.260879	0.0299919		222.4	0.231784	0.048945	-0.0664165	-0.119263	0.182903
222.6	1.37737	0.888274	0.492632	0.261007	0.0298106		222.6	0.231401	0.048731	-0.0667674	-0.119744	0.182636
222.8	1.37882	0.888588	0.493004	0.261685	0.0302492		222.8	0.230957	0.0483724	-0.066809	-0.120082	0.183
223	1.3798	0.889023	0.492988	0.261946	0.0302626		223	0.230236	0.0478413	-0.0675816	-0.120883	0.181899
223.2	1.3802	0.889709	0.49339	0.262047	0.03048		223.2	0.229391	0.0477068	-0.0679984	-0.121032	0.181341
223.4	1.38051	0.889696	0.4933	0.261758	0.030045		223.4	0.229328	0.047579	-0.0679506	-0.121288	0.181552
223.6	1.38064	0.890394	0.493911	0.262323	0.0304783		223.6	0.229808	0.0480339	-0.0677741	-0.120402	0.181887
223.8	1.38105	0.890864	0.493994	0.261915	0.0303593		223.8	0.229934	0.0479851	-0.068105	-0.120081	0.182018
224	1.38031	0.89133	0.493411	0.260988	0.0302049		224	0.230168	0.0479953	-0.0680326	-0.119365	0.182385
224.2	1.38072	0.891684	0.49399	0.261151	0.030474		224.2	0.230452	0.0481975	-0.0680159	-0.119524	0.182248
224.4	1.38088	0.892053	0.494064	0.260751	0.0306254		224.4	0.231032	0.0476699	-0.0679876	-0.120054	0.1824
224.6	1.38083	0.8922	0.494155	0.260598	0.0307483		224.6	0.231507	0.0475279	-0.0677055	-0.119966	0.182455
224.8	1.38052	0.892365	0.494044	0.260296	0.0301586		224.8	0.231866	0.0475669	-0.0677926	-0.120062	0.182477
225	1.38049	0.892286	0.493753	0.259653	0.0298008		225	0.231885	0.0472672	-0.0677142	-0.120227	0.182186
225.2	1.38038	0.892475	0.493916	0.259671	0.0296331		225.2	0.231894	0.0473549	-0.0676649	-0.120211	0.18226
225.4	1.38082	0.892565	0.494153	0.259935	0.0297511		225.4	0.232278	0.0474515	-0.0677149	-0.120134	0.182431
225.6	1.38118	0.892745	0.494543	0.260146	0.0300253		225.6	0.232713	0.0484053	-0.0671202	-0.119746	0.183421
225.8	1.3816	0.892804	0.494832	0.260241	0.0303015		225.8	0.232818	0.0483562	-0.0667975	-0.119697	0.183532
226	1.38186	0.892804	0.495126	0.260504	0.0302843		226	0.233235	0.04839	-0.0671007	-0.119914	0.183679
226.2	1.3831	0.893386	0.495941	0.260563	0.0306818		226.2	0.232875	0.0488099	-0.0673843	-0.120533	0.183784
226.4	1.38264	0.893406	0.495993	0.260326	0.0305247		226.4	0.23211	0.0486621	-0.0682063	-0.120988	0.183343
226.6	1.38283	0.893124	0.495685	0.26042	0.0299312		226.6	0.23176	0.0486346	-0.0687409	-0.121024	0.182845
226.8	1.38346	0.893069	0.49548	0.260941	0.0299237		226.8	0.231137	0.0483971	-0.0689926	-0.121225	0.182399
227	1.3832	0.893542	0.495287	0.261513	0.0296867		227	0.23092	0.0484165	-0.0695242	-0.121033	0.181947
227.2	1.38313	0.893999	0.495362	0.261443	0.0297575		227.2	0.230623	0.0484598	-0.0695333	-0.120803	0.182106
227.4	1.38364	0.894005	0.495265	0.261632	0.0297906		227.4	0.230839	0.0482798	-0.0697993	-0.121275	0.182128
227.6	1.38415	0.894667	0.495605	0.261814	0.0300347		227.6	0.231288	0.048525	-0.0696722	-0.120768	0.182071
227.8	1.38429	0.894885	0.495015	0.261056	0.0296417		227.8	0.231584	0.0481882	-0.0697089	-0.121455	0.181982
228	1.38466	0.895177	0.494679	0.260694	0.0293284		228	0.231611	0.0478676	-0.069682	-0.121653	0.182065
228.2	1.38591	0.895862	0.495597	0.261433	0.0298058		228.2	0.231867	0.0474703	-0.0695018	-0.122113	0.181654
228.4	1.38629	0.896308	0.495802	0.260887	0.0293213		228.4	0.231579	0.0470192	-0.0697397	-0.122638	0.181497
228.6	1.38613	0.896484	0.495978	0.260896	0.0288448		228.6	0.231533	0.0471824	-0.0696282	-0.122537	0.181689
228.8	1.3866	0.896858	0.496121	0.261141	0.0285509		228.8	0.231443	0.0469747	-0.0693451	-0.122389	0.181956
229	1.38709	0.897232	0.496584	0.26133	0.0288406		229	0.231189	0.0461056	-0.0697695	-0.123161	0.181914
229.2	1.3877	0.897497	0.497324	0.261558	0.0290639		229.2	0.230504	0.0453432	-0.0705336	-0.123492	0.181798
229.4	1.38843	0.897562	0.498136	0.262156	0.02936		229.4	0.230559	0.0453024	-0.0706043	-0.12364	0.182138
229.6	1.38955	0.897583	0.498743	0.262526	0.0294876		229.6	0.231111	0.0455133	-0.0702448	-0.123521	0.182529
229.8	1.39017	0.898219	0.49957	0.262925	0.0295877		229.8	0.230786	0.0453427	-0.0705818	-0.123449	0.182303
230	1.39034	0.898546	0.499957	0.26333	0.029858		230	0.230919	0.0453716	-0.0709031	-0.123238	0.181972
230.2	1.39049	0.899065	0.500547	0.263741	0.0301427		230.2	0.230904	0.0458862	-0.0707691	-0.123186	0.182354
230.4	1.39046	0.898741	0.500616	0.263786	0.0298669		230.4	0.230767	0.0459907	-0.0708237	-0.122938	0.181931
230.6	1.39146	0.89921	0.501194	0.264517	0.0300537		230.6	0.230568	0.0459401	-0.0711817	-0.123283	0.181763
230.8	1.39223	0.899594	0.501229	0.264521	0.0301736		230.8	0.230363	0.0456538	-0.0712748	-0.123626	0.181786
231	1.39319	0.899972	0.501725	0.264936	0.0305961		231	0.230219	0.0457407	-0.07163	-0.124025	0.181704
231.2	1.39388	0.899515	0.501571	0.26438	0.0305704		231.2	0.230053	0.0454546	-0.0716975	-0.124667	0.181458
231.4	1.39466	0.899293	0.50103	0.264108	0.0301086		231.4	0.230339	0.0452397	-0.071816	-0.125223	0.181274
231.6	1.3953	0.899882	0.500835	0.264036	0.0299006		231.6	0.230374	0.0448589	-0.0720251	-0.125598	0.181021
231.8	1.39581	0.900947	0.500318	0.264124	0.0299125		231.8	0.22977	0.0444329	-0.0719815	-0.126121	0.180752
232	1.39662	0.901134	0.500171	0.264056	0.0297431		232	0.230085	0.0445275	-0.0714067	-0.125741	0.181484
232.2	1.39684	0.901828	0.500486	0.264111	0.0296045		232.2	0.229903	0.0443688	-0.0717557	-0.126182	0.181261
232.4	1.39748	0.90215	0.500463	0.263985	0.0295611		232.4	0.229806	0.0446047	-0.0718605	-0.126327	0.181643
232.6	1.39738	0.902455	0.50012	0.263848	0.0292875		232.6	0.229934	0.0444905	-0.0721097	-0.126865	0.181416
232.8	1.39821	0.902749	0.499914	0.263929	0.0290011		232.8	0.229809	0.0442633	-0.0723818	-0.127186	0.181671
233	1.39794	0.902707	0.4999	0.263357	0.0288459		233	0.229671	0.0434821	-0.0733731	-0.128273	0.181322
233.2	1.39828	0.902927	0.500288	0.262931	0.0286422		233.2	0.230344	0.0434341	-0.0734737	-0.127997	0.18163
233.4	1.39876	0.903494	0.500988	0.263441	0.0289095		233.4	0.231151	0.0438164	-0.0732094	-0.127994	0.181952
233.6	1.39914	0.903807	0.500878	0.263469	0.0289381		233.6	0.23159	0.0437416	-0.0734013	-0.12793	0.181612
233.8	1.39949	0.904441	0.50144	0.264187	0.0292473		233.8	0.231885	0.0441525	-0.0731006	-0.127425	0.181985
234	1.39924	0.904982	0.501759	0.263821	0.0295441		234	0.232041	0.0441986	-0.0730197	-0.127174	0.181969
234.2	1.39947	0.905448	0.502057	0.264083	0.0293887		234.2	0.232238	0.044402	-0.0728874	-0.126783	0.182193
234.4	1.40018	0.905691	0.502865	0.264506	0.029628		234.4	0.231958	0.0446285	-0.0730149	-0.127261	0.182141
234.6	1.40188	0.906688	0.504078	0.265332	0.0302411		234.6	0.232104	0.0447643	-0.0736049	-0.127409	0.182385
234.8	1.40239	0.90664	0.504137	0.265585	0.0301497		234.8	0.23133	0.0442652	-0.0737996	-0.127759	0.182243
235	1.40323	0.906865	0.504518	0.266174	0.0303592		235	0.230738	0.0442968	-0.0741246	-0.127782	0.182045
235.2	1.40321	0.906962	0.504467	0.266456	0.0297967		235.2	0.230607	0.0438943	-0.0743452	-0.127841	0.181672
235.4	1.40312	0.907292	0.503894	0.26654	0.0292437		235.4	0.230383	0.0437884	-0.0747061	-0.127864	0.181278
235.6	1.40283	0.907447	0.503575	0.266561	0.0289082		235.6	0.229795	0.0435356	-0.0745582	-0.12789	0.180986
235.8	1.40296	0.907719	0.503386	0.266712	0.0288582		235.8	0.229446	0.0435894	-0.0743861	-0.128099	0.181009
236	1.40311	0.907236	0.50319	0.266662	0.0287829		236	0.230231	0.0442453	-0.0734708	-0.127457	0.181638
236.2	1.40288	0.907562	0.503174	0.266482	0.0284555		236.2	0.229769	0.0436158	-0.0740411	-0.12815	0.180885
236.4	1.40363	0.90773	0.503495	0.26665	0.0287604		236.4	0.229392	0.0434813	-0.0741407	-0.128289	0.180719
236.6	1.40329	0.907326	0.503294	0.265855	0.0281552		236.6	0.229335	0.0430322	-0.0747461	-0.128726	0.180297
236.8	1.40369	0.907233	0.503047	0.265801	0.0283354		236.8	0.229479	0.0427758	-0.0744714	-0.128311	0.180617
237	1.40385	0.907339	0.503272	0.265554	0.0286754		237	0.229764	0.0427596	-0.0743081	-0.128379	0.18055
237.2	1.40442	0.90784	0.503732	0.265234	0.0290723		237.2	0.230024	0.0428941	-0.0738686	-0.127883	0.181207
237.4	1.40491	0.908294	0.504184	0.265221	0.029633		237.4	0.229761	0.0427456	-0.0737352	-0.128106	0.181164
237.6	1.405	0.908131	0.503808	0.26448	0.0295676		237.6	0.229993	0.0425498	-0.0733948	-0.127814	0.181456
237.8	1.40512	0.908091	0.504152	0.264448	0.0293764		237.8	0.230271	0.0423141	-0.0735179	-0.127811	0.181926
238	1.40576	0.908618	0.504809	0.26381	0.0293215		238	0.230582	0.0420336	-0.0734052	-0.127389	0.182007
238.2	1.40684	0.90911	0.505489	0.264668	0.0298267		238.2	0.23116	0.0422159	-0.0730559	-0.126647	0.182636
238.4	1.40762	0.908884	0.506332	0.265315	0.0299515		238.4	0.231302	0.0421906	-0.0731598	-0.126662	0.183199
238.6	1.40924	0.909566	0.507136	0.265802	0.030072		238.6	0.231293	0.0421103	-0.0737431	-0.126623	0.183346
238.8	1.40919	0.909791	0.506887	0.266008	0.0300868		238.8	0.23084	0.0415551	-0.0739121	-0.126822	0.183212
239	1.41	0.910902	0.507259	0.266776	0.0303383		239	0.230959	0.0418303	-0.0742677	-0.126976	0.183175
239.2	1.41017	0.911152	0.50766	0.267371	0.0297995		239.2	0.23077	0.0413777	-0.0748649	-0.12791	0.182473
239.4	1.41085	0.911492	0.50764	0.267369	0.0296497		239.4	0.230806	0.0416015	-0.0757052	-0.128273	0.182368
239.6	1.41106	0.911493	0.507624	0.267268	0.0294327		239.6	0.230588	0.0417308	-0.075509	-0.128358	0.182347
239.8	1.41187	0.911846	0.507834	0.267591	0.0294898		239.8	0.231049	0.0420053	-0.0755176	-0.128661	0.182649
240	1.4124	0.912453	0.508509	0.268048	0.0298806		240	0.230919	0.04228	-0.0753878	-0.128972	0.182308
240.2	1.41326	0.913271	0.508951	0.268499	0.0300182		240.2	0.230349	0.0413976	-0.0763024	-0.129933	0.18184
240.4	1.41409	0.914004	0.509027	0.268786	0.0303109		240.4	0.229758	0.0415123	-0.0765865	-0.130549	0.181418
240.6	1.41465	0.914138	0.508775	0.2686	0.0304893		240.6	0.230165	0.0414906	-0.0768139	-0.131031	0.181538
240.8	1.41535	0.915061	0.508931	0.26935	0.031115		240.8	0.229715	0.0418595	-0.0768544	-0.131738	0.181437
241	1.41613	0.915484	0.509575	0.269853	0.0315628		241	0.229474	0.0418547	-0.0772088	-0.132189	0.181489
241.2	1.41633	0.915795	0.509691	0.269811	0.0316831		241.2	0.229808	0.0422528	-0.0766344	-0.132088	0.181853
241.4	1.41624	0.916413	0.509818	0.269971	0.0316807		241.4	0.229644	0.0424266	-0.0766121	-0.132405	0.181356
241.6	1.41565	0.916557	0.509085	0.269621	0.0311523		241.6	0.230284	0.0427222	-0.0761868	-0.132236	0.18138
241.8	1.41634	0.916795	0.509212	0.270046	0.0308241		241.8	0.229767	0.0420086	-0.0764159	-0.13233	0.181008
242	1.41773	0.91749	0.509905	0.270844	0.0312388		242	0.229946	0.0421931	-0.0758423	-0.131813	0.180713
242.2	1.41812	0.917505	0.510293	0.271348	0.0313117		242.2	0.230161	0.0423754	-0.0754872	-0.130892	0.181126
242.4	1.41866	0.917634	0.510448	0.271357	0.030671		242.4	0.230238	0.0420762	-0.0755975	-0.131011	0.181244
242.6	1.41927	0.918108	0.51062	0.271477	0.0306153		242.6	0.229832	0.0416506	-0.0758976	-0.131121	0.181073
242.8	1.4195	0.918108	0.510435	0.271594	0.0305231		242.8	0.230086	0.0415589	-0.075842	-0.130975	0.181303
243	1.42063	0.918456	0.510793	0.272171	0.0303939		243	0.230235	0.0411788	-0.0759862	-0.131361	0.181273
243.2	1.42108	0.918652	0.51104	0.272296	0.0301701		243.2	0.230314	0.0411086	-0.0763023	-0.131644	0.181331
243.4	1.42151	0.918643	0.510824	0.272053	0.0302383		243.4	0.230348	0.0412846	-0.0765272	-0.1316	0.181718
243.6	1.42113	0.918324	0.510544	0.271754	0.0300964		243.6	0.230654	0.0415452	-0.076004	-0.131387	0.182208
243.8	1.42169	0.91853	0.510388	0.271721	0.0296752		243.8	0.231017	0.0413807	-0.0764357	-0.131627	0.182333
244	1.42199	0.918621	0.510551	0.271812	0.029597		244	0.230507	0.0412704	-0.0770169	-0.132335	0.182213
244.2	1.42288	0.918985	0.510478	0.271609	0.0297426		244.2	0.230616	0.0408792	-0.0776912	-0.132665	0.182754
244.4	1.42306	0.918831	0.510208	0.271075	0.0299566		244.4	0.230624	0.0408521	-0.0782545	-0.133341	0.181987
244.6	1.42281	0.917991	0.510033	0.270257	0.0294015		244.6	0.231135	0.0411332	-0.0785432	-0.133364	0.182775
244.8	1.42296	0.918051	0.51024	0.270169	0.0294662		244.8	0.23094	0.0412634	-0.0790293	-0.133507	0.18266
245	1.42288	0.91788	0.510299	0.270343	0.029458		245	0.231367	0.0420122	-0.0784056	-0.132798	0.183001
245.2	1.42319	0.918695	0.510311	0.270406	0.029669		245.2	0.231659	0.0427589	-0.0777862	-0.132567	0.183226
245.4	1.42343	0.919657	0.510661	0.2701	0.0297389		245.4	0.230935	0.0427167	-0.0781451	-0.132785	0.182449
245.6	1.42398	0.920197	0.510751	0.269885	0.0297879		245.6	0.231008	0.0429925	-0.077869	-0.132653	0.182822
245.8	1.42521	0.920848	0.511355	0.270344	0.0297396		245.8	0.230016	0.0427593	-0.0779502	-0.132988	0.182748
246	1.4258	0.921659	0.512039	0.270788	0.0302106		246	0.229934	0.0431414	-0.0770838	-0.133041	0.183163
246.2	1.42601	0.921949	0.512604	0.270382	0.0299904		246.2	0.230326	0.0431526	-0.076454	-0.132573	0.183842
246.4	1.42695	0.922905	0.513433	0.271001	0.030228		246.4	0.230156	0.0428045	-0.0763977	-0.132888	0.183654
246.6	1.42722	0.923142	0.51387	0.271971	0.0306672		246.6	0.229769	0.0423123	-0.0765701	-0.1326	0.183024
246.8	1.42843	0.923839	0.514562	0.272709	0.0309574		246.8	0.229636	0.04152	-0.0762667	-0.13311	0.182984
247	1.42869	0.924183	0.514652	0.272986	0.0309775		247	0.229808	0.0408701	-0.0762135	-0.13324	0.182642
247.2	1.429	0.924484	0.514801	0.273288	0.0310322		247.2	0.229657	0.0406033	-0.0764497	-0.133553	0.182605
247.4	1.42921	0.924281	0.514848	0.273526	0.0310409		247.4	0.230156	0.0406193	-0.0763689	-0.133596	0.1827
247.6	1.42961	0.924771	0.515221	0.27375	0.0308781		247.6	0.230572	0.0402338	-0.0767853	-0.13369	0.182645
247.8	1.43017	0.924892	0.5153	0.273586	0.030265		247.8	0.230453	0.0396448	-0.0773237	-0.133701	0.182242
248	1.42998	0.924813	0.515495	0.27355	0.0302598		248	0.23019	0.0392087	-0.0782283	-0.13397	0.181793
248.2	1.43062	0.924709	0.5155	0.273118	0.0305539		248.2	0.230518	0.0389064	-0.0785687	-0.133656	0.181629
248.4	1.43048	0.923876	0.515241	0.272828	0.0300838		248.4	0.2306	0.0390286	-0.0789405	-0.133596	0.181243
248.6	1.43005	0.923295	0.514741	0.272234	0.0295585		248.6	0.230786	0.0394224	-0.0787359	-0.133185	0.182175
248.8	1.43084	0.923474	0.515307	0.272714	0.0297886		248.8	0.231196	0.0395842	-0.0788334	-0.132828	0.18222
249	1.43123	0.92355	0.515246	0.272916	0.0294891		249	0.23137	0.0399422	-0.0787433	-0.132874	0.182139
249.2	1.4319	0.924232	0.515553	0.272684	0.0294227		249.2	0.231429	0.0398658	-0.079429	-0.133444	0.182075
249.4	1.43259	0.924377	0.51583	0.272785	0.0291578		249.4	0.231179	0.0400953	-0.0797555	-0.133609	0.181809
249.6	1.43339	0.9252	0.516206	0.273666	0.0294017		249.6	0.23126	0.0404789	-0.0798497	-0.133688	0.182534
249.8	1.43374	0.926181	0.516739	0.274862	0.0298682		249.8	0.231161	0.0408743	-0.0795622	-0.133848	0.183114
250	1.43423	0.926721	0.517241	0.275396	0.0304533		250	0.231057	0.040943	-0.0790911	-0.133904	0.183305
250.2	1.43496	0.927402	0.517856	0.275959	0.0307502		250.2	0.230929	0.0408333	-0.0791604	-0.134123	0.18265
250.4	1.43555	0.927892	0.518446	0.276721	0.0312137		250.4	0.230689	0.0404402	-0.0796571	-0.13447	0.18183
250.6	1.43599	0.92774	0.518665	0.277181	0.0314501		250.6	0.230519	0.0402229	-0.0799008	-0.134778	0.181372
250.8	1.43647	0.928323	0.518673	0.277068	0.0312493		250.8	0.23061	0.0400099	-0.0797451	-0.135451	0.181669
251	1.43621	0.927955	0.518411	0.276621	0.030774		251	0.231331	0.0404878	-0.0800803	-0.135169	0.181678
251.2	1.43686	0.928013	0.518406	0.276773	0.0307726		251.2	0.231106	0.0403018	-0.0802653	-0.135518	0.181635
251.4	1.43675	0.928118	0.518053	0.276351	0.0305541		251.4	0.231322	0.0405227	-0.0804751	-0.135869	0.181642
251.6	1.43685	0.928916	0.518105	0.276188	0.0304039		251.6	0.230995	0.0403689	-0.080739	-0.1363	0.181542
251.8	1.43716	0.929651	0.518376	0.275958	0.0300395		251.8	0.231247	0.0408553	-0.0805062	-0.136454	0.181893
252	1.43709	0.929658	0.518137	0.275891	0.0301838		252	0.231298	0.0410759	-0.0805468	-0.13638	0.182306
252.2	1.43768	0.929823	0.518595	0.275951	0.0304692		252.2	0.231492	0.0416294	-0.0799375	-0.136393	0.182958
252.4	1.4376	0.929687	0.518822	0.276302	0.0299352		252.4	0.231611	0.0419005	-0.0799481	-0.136703	0.183261
252.6	1.43777	0.929797	0.518783	0.276513	0.0300209		252.6	0.231078	0.0409431	-0.0805986	-0.13768	0.182881
252.8	1.43843	0.930168	0.519476	0.276959	0.0298371		252.8	0.231031	0.0402202	-0.0812264	-0.138104	0.182542
253	1.43861	0.930341	0.518946	0.276974	0.0292835		253	0.230722	0.039691	-0.0818104	-0.138715	0.182057
253.2	1.43946	0.931167	0.519793	0.27786	0.0295543		253.2	0.230949	0.0397314	-0.0822263	-0.138756	0.18218
253.4	1.44004	0.931641	0.520378	0.278634	0.0297881		253.4	0.231186	0.0392601	-0.0825173	-0.138676	0.181983
253.6	1.4405	0.932519	0.520728	0.278967	0.0301518		253.6	0.232046	0.0393943	-0.082074	-0.138115	0.1825
253.8	1.44052	0.932831	0.520926	0.279088	0.0304248		253.8	0.232413	0.0395934	-0.0818297	-0.13786	0.182488
254	1.44132	0.933146	0.52105	0.279041	0.0306574		254	0.232275	0.0391873	-0.0816295	-0.138352	0.182008
254.2	1.4422	0.933663	0.521401	0.279002	0.0312408		254.2	0.232821	0.0393243	-0.0808998	-0.137985	0.182185
254.4	1.44267	0.93386	0.521319	0.278461	0.031639		254.4	0.233213	0.0393998	-0.0809752	-0.138259	0.182202
254.6	1.44339	0.933706	0.520934	0.278208	0.0312831		254.6	0.233333	0.0394484	-0.0807784	-0.138097	0.182552
254.8	1.44351	0.934158	0.520882	0.277659	0.0310635		254.8	0.233899	0.0396856	-0.0806233	-0.137752	0.182837
255	1.44366	0.933763	0.520381	0.277239	0.0307037		255	0.234433	0.0403273	-0.0798378	-0.136977	0.183618
255.2	1.44404	0.933844	0.5198	0.27688	0.0304458		255.2	0.234328	0.0402269	-0.0792638	-0.137006	0.1835
255.4	1.444	0.933757	0.519298	0.276136	0.0299722		255.4	0.234399	0.0403388	-0.0789524	-0.137443	0.183676
255.6	1.44423	0.934153	0.519586	0.275982	0.0299987		255.6	0.234265	0.0405116	-0.0787617	-0.137866	0.184038
255.8	1.44514	0.934978	0.520395	0.276142	0.0299342		255.8	0.2345	0.0407731	-0.0786683	-0.13803	0.184482
256	1.4452	0.934345	0.520301	0.276021	0.0295651		256	0.233536	0.0406035	-0.0787315	-0.138104	0.184007
256.2	1.44563	0.934847	0.520707	0.276359	0.0295185		256.2	0.232736	0.0398653	-0.0794634	-0.138817	0.18343
256.4	1.44619	0.934678	0.520678	0.276638	0.0292977		256.4	0.232106	0.0393455	-0.080446	-0.139678	0.182619
256.6	1.44671	0.934977	0.521067	0.277177	0.0295491		256.6	0.231032	0.0379683	-0.0823211	-0.140464	0.181592
256.8	1.44705	0.935259	0.521519	0.277696	0.029674		256.8	0.230844	0.0377625	-0.0827488	-0.140439	0.181569
257	1.44747	0.935613	0.521779	0.27834	0.029591		257	0.230696	0.0377928	-0.0831843	-0.140263	0.18156
257.2	1.4485	0.936307	0.522798	0.278956	0.0301983		257.2	0.230322	0.0375901	-0.083613	-0.140539	0.181317
257.4	1.44876	0.936355	0.52321	0.2791	0.0301358		257.4	0.230265	0.0374237	-0.0839084	-0.140418	0.181137
257.6	1.44974	0.936935	0.52383	0.279972	0.0308739		257.6	0.23005	0.0372612	-0.0839869	-0.14074	0.1812
257.8	1.44996	0.936953	0.523924	0.280349	0.0309809		257.8	0.229774	0.0372335	-0.0845716	-0.14122	0.180758
258	1.45114	0.937691	0.524769	0.281319	0.0318082		258	0.229504	0.0367963	-0.0847911	-0.141594	0.180751
258.2	1.45114	0.938092	0.524808	0.281086	0.0315075		258.2	0.230121	0.0373454	-0.0846873	-0.141116	0.180958
258.4	1.45193	0.938769	0.525357	0.281602	0.0317257		258.4	0.229487	0.0368158	-0.0852717	-0.141991	0.180324
258.6	1.45255	0.939366	0.525846	0.282129	0.0318671		258.6	0.230035	0.0370053	-0.0852345	-0.141274	0.181103
258.8	1.45331	0.940332	0.526932	0.282554	0.0322233		258.8	0.230367	0.0377234	-0.0849454	-0.140912	0.181377
259	1.45347	0.940948	0.526799	0.282457	0.0323574		259	0.230714	0.0379518	-0.0843651	-0.140316	0.181975
259.2	1.45399	0.941651	0.527087	0.282035	0.0322712		259.2	0.231213	0.0380407	-0.0839134	-0.140337	0.181955
259.4	1.45472	0.942519	0.527685	0.282218	0.0329199		259.4	0.231636	0.0379816	-0.0836292	-0.140523	0.182555
259.6	1.45517	0.943396	0.528187	0.282004	0.0330819		259.6	0.231754	0.0379391	-0.0836011	-0.140585	0.182855
259.8	1.45545	0.943995	0.528408	0.281903	0.0326473		259.8	0.231806	0.0383252	-0.0832185	-0.140196	0.183023
260	1.45551	0.943645	0.528044	0.281214	0.0322453		260	0.231565	0.0387435	-0.0827613	-0.139925	0.183219
260.2	1.45606	0.944183	0.528269	0.280943	0.0323885		260.2	0.231581	0.0386536	-0.0830127	-0.140173	0.18318
260.4	1.45645	0.94447	0.528687	0.281222	0.032381		260.4	0.230905	0.0383743	-0.0833935	-0.140537	0.182592
260.6	1.45634	0.944403	0.528586	0.281452	0.0322636		260.6	0.230475	0.0375709	-0.0840855	-0.141113	0.181927
260.8	1.45571	0.944031	0.527821	0.28117	0.031819		260.8	0.230539	0.0378218	-0.0833471	-0.141274	0.182068
261	1.45579	0.943721	0.527714	0.280886	0.0314086		261	0.23029	0.038007	-0.0833747	-0.140983	0.182246
261.2	1.45631	0.943649	0.527385	0.281142	0.0311384		261.2	0.229764	0.0380948	-0.0834883	-0.141368	0.182041
261.4	1.45625	0.94309	0.527405	0.281129	0.0305442		261.4	0.229939	0.0376621	-0.0836608	-0.141047	0.182185
261.6	1.45642	0.942798	0.527218	0.281425	0.0306059		261.6	0.230225	0.0372744	-0.0836323	-0.141452	0.18214
261.8	1.45624	0.942115	0.526783	0.280844	0.0300244		261.8	0.230496	0.0372908	-0.0839007	-0.14105	0.18201
262	1.45682	0.942299	0.527331	0.281274	0.0300488		262	0.230536	0.0372215	-0.0840806	-0.141253	0.181811
262.2	1.45705	0.942411	0.52725	0.281043	0.0296867		262.2	0.230843	0.0374826	-0.0840156	-0.140992	0.181772
262.4	1.45875	0.943113	0.528276	0.282157	0.0305621		262.4	0.230691	0.0368419	-0.0839161	-0.141252	0.181719
262.6	1.45945	0.94348	0.528523	0.282421	0.0309764		262.6	0.231298	0.0371442	-0.0840686	-0.140783	0.182198
262.8	1.4604	0.943934	0.52857	0.282663	0.0313346		262.8	0.231246	0.0372046	-0.0842614	-0.140794	0.181957
263	1.46059	0.944379	0.528286	0.282275	0.0316813		263	0.231696	0.0370491	-0.0840738	-0.140447	0.182205
263.2	1.46171	0.945007	0.528646	0.282702	0.0318311		263.2	0.232009	0.0370933	-0.0840977	-0.140639	0.182567
263.4	1.46221	0.945259	0.528332	0.282427	0.0319224		263.4	0.231848	0.0364508	-0.0847105	-0.140786	0.182716
263.6	1.46232	0.945317	0.528118	0.281521	0.0313671		263.6	0.231438	0.0362889	-0.0851157	-0.140991	0.182738
263.8	1.46292	0.945452	0.527782	0.281472	0.0314683		263.8	0.230922	0.0363947	-0.0853093	-0.141165	0.182801
264	1.46391	0.94588	0.527656	0.281016	0.0316533		264	0.231027	0.0362417	-0.0856651	-0.141595	0.182831
264.2	1.46479	0.94666	0.527942	0.281	0.0314355		264.2	0.230212	0.0357316	-0.0863582	-0.142233	0.182091
264.4	1.46541	0.947263	0.52832	0.281472	0.0318841		264.4	0.229852	0.0356084	-0.086557	-0.142501	0.181579
264.6	1.46516	0.94694	0.52812	0.281437	0.0316307		264.6	0.22973	0.0356748	-0.0870159	-0.143443	0.181141
264.8	1.46487	0.946891	0.52816	0.281259	0.0312167		264.8	0.229908	0.0360728	-0.0868936	-0.143476	0.181189
265	1.46526	0.947016	0.528666	0.281077	0.0310356		265	0.230223	0.0367856	-0.0869171	-0.14354	0.181528
265.2	1.46572	0.947496	0.529062	0.281553	0.0308885		265.2	0.230058	0.0366446	-0.0870661	-0.143738	0.181552
265.4	1.46653	0.947911	0.530405	0.281936	0.0309458		265.4	0.229999	0.0364769	-0.0869716	-0.143561	0.181729
265.6	1.46682	0.948304	0.531454	0.282597	0.0309649		265.6	0.230206	0.036651	-0.0868413	-0.14357	0.181937
265.8	1.46731	0.948454	0.532219	0.282546	0.0308977		265.8	0.230009	0.0364948	-0.0866104	-0.143785	0.181881
266	1.46752	0.948746	0.532723	0.282937	0.030534		266	0.229752	0.0360587	-0.086743	-0.14449	0.181147
266.2	1.46775	0.948577	0.532933	0.283508	0.0307777		266.2	0.229423	0.0359544	-0.0867289	-0.14457	0.181031
266.4	1.46843	0.94895	0.533137	0.284423	0.0308314		266.4	0.229559	0.0359978	-0.0865994	-0.14463	0.181133
266.6	1.46884	0.948816	0.532645	0.284696	0.0308372		266.6	0.22976	0.0362459	-0.0870656	-0.144537	0.181155
266.8	1.46899	0.949168	0.532432	0.285241	0.0309326		266.8	0.229876	0.0366608	-0.0868073	-0.144047	0.181726
267	1.46894	0.94914	0.532203	0.285334	0.0304377		267	0.230017	0.0366378	-0.0869219	-0.143788	0.181851
267.2	1.46926	0.949817	0.53246	0.28569	0.0307071		267.2	0.230378	0.0362944	-0.0872168	-0.14391	0.18228
267.4	1.46914	0.949876	0.531853	0.284969	0.0307007		267.4	0.230014	0.036005	-0.0872903	-0.144059	0.182153
267.6	1.46967	0.950234	0.531866	0.284959	0.0310589		267.6	0.230046	0.0354914	-0.0876733	-0.14452	0.181547
267.8	1.47055	0.950915	0.531803	0.285358	0.0317799		267.8	0.229936	0.0351094	-0.0879171	-0.14471	0.181453
268	1.47139	0.951547	0.532132	0.28544	0.0322887		268	0.230051	0.0352773	-0.0883509	-0.144771	0.181001
268.2	1.47173	0.951999	0.532589	0.285617	0.0325502		268.2	0.229778	0.0358154	-0.0878161	-0.144365	0.181272
268.4	1.47195	0.952271	0.532996	0.285677	0.0332317		268.4	0.230197	0.0360788	-0.0873481	-0.144164	0.18144
268.6	1.47186	0.952254	0.533498	0.285539	0.0332902		268.6	0.230007	0.0359423	-0.0874523	-0.144772	0.181275
268.8	1.47243	0.952254	0.533783	0.28528	0.0333207		268.8	0.230476	0.0361571	-0.087005	-0.144684	0.181542
269	1.47305	0.95253	0.534078	0.285207	0.0331774		269	0.231264	0.0365156	-0.0865793	-0.14427	0.182059
269.2	1.47415	0.953676	0.535159	0.285892	0.0336237		269.2	0.230878	0.0361541	-0.0867557	-0.14386	0.182138
269.4	1.475	0.954343	0.536219	0.286346	0.0337332		269.4	0.230836	0.0363043	-0.0865093	-0.143578	0.182441
269.6	1.47446	0.954159	0.5362	0.286098	0.0334436		269.6	0.231642	0.0366944	-0.085886	-0.143069	0.183265
269.8	1.47527	0.954517	0.535888	0.285896	0.0334624		269.8	0.231531	0.0362232	-0.0861112	-0.143482	0.182997
270	1.47554	0.954735	0.535548	0.286111	0.0330533		270	0.231638	0.0363449	-0.0862381	-0.14353	0.182817
270.2	1.47681	0.95547	0.535877	0.286881	0.0337876		270.2	0.231855	0.0367429	-0.0860949	-0.143465	0.183293
270.4	1.47773	0.95626	0.536176	0.287552	0.0339731		270.4	0.232244	0.037012	-0.0862151	-0.14345	0.183622
270.6	1.47849	0.956541	0.536508	0.287698	0.0340027		270.6	0.232517	0.0372564	-0.0864119	-0.143854	0.183728
270.8	1.47825	0.956555	0.536615	0.287993	0.033792		270.8	0.232567	0.0376697	-0.0864452	-0.143801	0.184225
271	1.47852	0.956515	0.536501	0.28778	0.0333277		271	0.232544	0.0370299	-0.0871969	-0.144956	0.18378
271.2	1.47845	0.956521	0.53655	0.287391	0.0332045		271.2	0.232579	0.0365861	-0.0876017	-0.145625	0.183889
271.4	1.47866	0.956231	0.536378	0.287255	0.0327228		271.4	0.231848	0.0358161	-0.0885434	-0.146745	0.182696
271.6	1.47903	0.956387	0.536656	0.287506	0.0327364		271.6	0.231264	0.0351744	-0.089704	-0.14791	0.181675
271.8	1.47875	0.956493	0.536626	0.28761	0.0320976		271.8	0.230583	0.035114	-0.0903842	-0.148501	0.181112
272	1.47875	0.956318	0.536532	0.287462	0.0318571		272	0.22976	0.0352059	-0.0908535	-0.148743	0.180692
272.2	1.4785	0.956127	0.536477	0.287237	0.0314567		272.2	0.229646	0.035207	-0.0904649	-0.148945	0.181021
272.4	1.47904	0.956628	0.536843	0.287043	0.0316476		272.4	0.229528	0.0347916	-0.0906837	-0.149505	0.1804
272.6	1.47899	0.956367	0.537085	0.286913	0.0310275		272.6	0.229394	0.0346012	-0.0908202	-0.150102	0.179978
272.8	1.47948	0.956368	0.536756	0.286985	0.0304941		272.8	0.229655	0.0344919	-0.0908359	-0.150318	0.179944
273	1.47985	0.957224	0.537115	0.287754	0.0304596		273	0.229544	0.0345649	-0.091124	-0.150045	0.180205
273.2	1.48062	0.957854	0.53705	0.287887	0.030617		273.2	0.22987	0.034809	-0.0908346	-0.149524	0.180467
273.4	1.48109	0.958189	0.537035	0.288269	0.0305992		273.4	0.229436	0.0347358	-0.0905548	-0.149311	0.180661
273.6	1.48144	0.958641	0.537009	0.288698	0.0311413		273.6	0.229859	0.0348137	-0.0899993	-0.149093	0.181378
273.8	1.48295	0.95965	0.537173	0.289526	0.0316867		273.8	0.229705	0.034231	-0.0900398	-0.149452	0.181252
274	1.48367	0.960078	0.537637	0.289917	0.0318836		274	0.230087	0.034136	-0.0894386	-0.149152	0.181511
274.2	1.48455	0.960705	0.538152	0.290148	0.0325864		274.2	0.230237	0.0342595	-0.0891703	-0.148836	0.18154
274.4	1.48448	0.960337	0.538166	0.290616	0.0324581		274.4	0.230099	0.0343866	-0.0890233	-0.148603	0.18158
274.6	1.48511	0.960767	0.538389	0.290444	0.0326551		274.6	0.230766	0.0345547	-0.0889734	-0.14839	0.182124
274.8	1.48545	0.960853	0.538435	0.29087	0.0327503		274.8	0.231475	0.0346851	-0.0886993	-0.147731	0.182669
275	1.48585	0.961065	0.53875	0.290686	0.032665		275	0.23107	0.0342549	-0.0889635	-0.148218	0.182352
275.2	1.48592	0.960343	0.538453	0.290699	0.0324744		275.2	0.231172	0.0342524	-0.0890526	-0.147975	0.182595
275.4	1.48589	0.960016	0.538217	0.290723	0.0323012		275.4	0.230872	0.0338216	-0.0895041	-0.148468	0.182081
275.6	1.48602	0.959791	0.538367	0.290319	0.0323178		275.6	0.230491	0.0341164	-0.0895608	-0.148521	0.182308
275.8	1.48569	0.959106	0.538207	0.289633	0.0317836		275.8	0.23087	0.0343011	-0.089467	-0.14831	0.182669
276	1.48591	0.959063	0.538083	0.289118	0.0318192		276	0.231253	0.0343904	-0.0894178	-0.148247	0.182961
276.2	1.48583	0.959067	0.538233	0.289113	0.0315506		276.2	0.23135	0.0347834	-0.0892573	-0.148648	0.183146
276.4	1.48618	0.959449	0.538377	0.288896	0.0312705		276.4	0.231229	0.0351212	-0.0893823	-0.148792	0.183133
276.6	1.48611	0.959328	0.538606	0.2888	0.0308811		276.6	0.231326	0.0355801	-0.0892674	-0.148731	0.183544
276.8	1.48673	0.959776	0.53863	0.289009	0.0309492		276.8	0.231597	0.0360111	-0.0892631	-0.148674	0.184167
277	1.48672	0.960096	0.538723	0.289025	0.0307455		277	0.231587	0.0367757	-0.0893643	-0.148142	0.184785
277.2	1.48706	0.96016	0.53859	0.288524	0.03076		277.2	0.231951	0.0370504	-0.0890435	-0.148181	0.184669
277.4	1.48687	0.960573	0.53865	0.289079	0.0304601		277.4	0.231616	0.0369763	-0.0893086	-0.148229	0.184418
277.6	1.48684	0.960555	0.53839	0.289226	0.0303379		277.6	0.23202	0.0372672	-0.0890401	-0.148568	0.184232
277.8	1.48735	0.960484	0.538208	0.289423	0.0300292		277.8	0.231932	0.0368687	-0.0894204	-0.148708	0.183538
278	1.48801	0.960731	0.538825	0.289328	0.0300782		278	0.232024	0.0366639	-0.089586	-0.148577	0.183268
278.2	1.48841	0.961112	0.538873	0.289444	0.0299707		278.2	0.232247	0.0368452	-0.0891313	-0.148192	0.183074
278.4	1.48852	0.96138	0.539155	0.290124	0.0298915		278.4	0.231528	0.0362315	-0.0898705	-0.148722	0.182671
278.6	1.48949	0.962291	0.539837	0.29049	0.0308888		278.6	0.231524	0.035881	-0.0902308	-0.148952	0.182443
278.8	1.48993	0.962414	0.540105	0.291058	0.0308915		278.8	0.23147	0.0352462	-0.0902926	-0.148817	0.182205
279	1.4901	0.962331	0.540272	0.291108	0.0307782		279	0.230323	0.0344489	-0.0910752	-0.149869	0.18154
279.2	1.49045	0.962113	0.54028	0.290969	0.030788		279.2	0.230196	0.034011	-0.0911305	-0.150174	0.181414
279.4	1.49099	0.962779	0.540973	0.291098	0.0309624		279.4	0.229963	0.0333158	-0.0913686	-0.150432	0.181227
279.6	1.49187	0.963606	0.542178	0.291675	0.0316643		279.6	0.230068	0.0328092	-0.0911719	-0.150431	0.181196
279.8	1.49214	0.963913	0.542729	0.291994	0.0317307		279.8	0.230231	0.0325039	-0.0913985	-0.150697	0.181253
280	1.4925	0.964941	0.542992	0.2927	0.0319807		280	0.230165	0.0323778	-0.0914465	-0.1506	0.181233
280.2	1.49315	0.9655	0.543458	0.293099	0.0322057		280.2	0.230013	0.0325964	-0.0913125	-0.150332	0.181302
280.4	1.49381	0.966352	0.543795	0.293137	0.0324485		280.4	0.230247	0.0325353	-0.0913145	-0.150147	0.181629
280.6	1.4946	0.966714	0.543654	0.293305	0.0325976		280.6	0.230353	0.0324747	-0.0914387	-0.150354	0.181601
280.8	1.49555	0.96792	0.544096	0.293691	0.0329203		280.8	0.23114	0.0328105	-0.0916661	-0.15033	0.181812
281	1.49556	0.968325	0.544207	0.29372	0.0327665		281	0.232155	0.0334265	-0.0915302	-0.150112	0.182112
281.2	1.49539	0.968561	0.543818	0.293795	0.0326841		281.2	0.232587	0.0336012	-0.0912614	-0.150239	0.181992
281.4	1.49616	0.969	0.543593	0.294402	0.032616		281.4	0.232718	0.0334877	-0.0913975	-0.15077	0.181671
281.6	1.49672	0.96872	0.543127	0.294091	0.0326272		281.6	0.232692	0.0334966	-0.0913288	-0.151375	0.181443
281.8	1.49722	0.968672	0.543336	0.293994	0.0326408		281.8	0.232909	0.033158	-0.0917436	-0.151788	0.181484
282	1.49786	0.968795	0.543624	0.294055	0.0330292		282	0.233126	0.0333203	-0.0916831	-0.151938	0.181861
282.2	1.49764	0.968058	0.542838	0.293668	0.0325526		282.2	0.233389	0.0335434	-0.0915165	-0.151947	0.182155
282.4	1.49769	0.967627	0.542623	0.293547	0.0327641		282.4	0.233416	0.0336028	-0.0921159	-0.152334	0.182675
282.6	1.4984	0.967548	0.542698	0.293678	0.0331802		282.6	0.233576	0.0331678	-0.0921148	-0.152221	0.183096
282.8	1.49879	0.967724	0.543103	0.29381	0.033387		282.8	0.233907	0.0330776	-0.0921728	-0.152545	0.18386
283	1.4986	0.967777	0.543338	0.293617	0.0334258		283	0.23304	0.0330157	-0.0923102	-0.152783	0.183778
283.2	1.49899	0.968433	0.543385	0.293507	0.0334038		283.2	0.232374	0.0329799	-0.0922976	-0.152553	0.18358
283.4	1.49976	0.968784	0.544008	0.294223	0.0336084		283.4	0.231991	0.0320703	-0.0928736	-0.152413	0.183156
283.6	1.50024	0.969129	0.544621	0.294735	0.0336951		283.6	0.231999	0.0318194	-0.093001	-0.152136	0.183144
283.8	1.50111	0.9701	0.545476	0.295428	0.0341555		283.8	0.231637	0.0316716	-0.0937675	-0.151733	0.182772
284	1.50185	0.970723	0.545507	0.295413	0.0339461		284	0.231873	0.0317313	-0.0934708	-0.151055	0.182759
284.2	1.50239	0.9713	0.54584	0.295299	0.0335314		284.2	0.232055	0.0316207	-0.0936913	-0.150586	0.182529
284.4	1.50274	0.971925	0.546272	0.295735	0.0333149		284.4	0.232188	0.0314528	-0.0937463	-0.150103	0.182518
284.6	1.5039	0.972331	0.54692	0.296311	0.0330434		284.6	0.232256	0.0315132	-0.0937715	-0.149845	0.182397
284.8	1.50458	0.973503	0.547929	0.296707	0.0331938		284.8	0.232647	0.0316065	-0.0936673	-0.149582	0.182284
285	1.50432	0.973503	0.54772	0.296471	0.0323088		285	0.233342	0.0318938	-0.09284	-0.149121	0.182812
285.2	1.50487	0.973963	0.547405	0.296192	0.0318361		285.2	0.232684	0.0319058	-0.0927546	-0.14929	0.182593
285.4	1.50574	0.974035	0.547667	0.296127	0.0318606		285.4	0.232336	0.0317395	-0.0930062	-0.149833	0.182375
285.6	1.50582	0.973792	0.547802	0.295552	0.03158		285.6	0.232266	0.0317104	-0.0928732	-0.149825	0.182508
285.8	1.50604	0.973751	0.548119	0.295264	0.031482		285.8	0.23222	0.0315222	-0.0932307	-0.150128	0.182144
286	1.50654	0.973629	0.548184	0.295209	0.0317061		286	0.232273	0.0320898	-0.0931337	-0.149778	0.18206
286.2	1.5065	0.973638	0.548332	0.294877	0.0315713		286.2	0.233102	0.032243	-0.0927657	-0.14988	0.18259
286.4	1.50681	0.973699	0.548078	0.294911	0.0318683		286.4	0.233642	0.0324057	-0.0925776	-0.149684	0.183123
286.6	1.50727	0.97386	0.548375	0.294975	0.0321929		286.6	0.233089	0.0321595	-0.0929338	-0.149795	0.18286
286.8	1.50734	0.97378	0.548296	0.295081	0.0326399		286.8	0.233197	0.032674	-0.0928803	-0.150238	0.183158
287	1.50715	0.973799	0.547715	0.294998	0.0322586		287	0.232837	0.0328326	-0.0928617	-0.150252	0.18281
287.2	1.50816	0.974354	0.547849	0.295272	0.032543		287.2	0.232611	0.0322691	-0.0933313	-0.150992	0.182408
287.4	1.50908	0.974315	0.54822	0.295768	0.0328437		287.4	0.232866	0.0317983	-0.0936186	-0.151273	0.181926
287.6	1.50969	0.975191	0.548498	0.295853	0.0331494		287.6	0.233437	0.0322335	-0.0934033	-0.151037	0.182365
287.8	1.50997	0.97587	0.548934	0.296015	0.033492		287.8	0.233261	0.0319693	-0.0939167	-0.150954	0.181773
288	1.50941	0.975503	0.548694	0.295619	0.0328478		288	0.233455	0.0323084	-0.0936783	-0.151045	0.181998
288.2	1.50872	0.975524	0.548827	0.296552	0.0326766		288.2	0.233807	0.0324869	-0.0935538	-0.150855	0.18202
288.4	1.50906	0.975351	0.549408	0.296792	0.0323744		288.4	0.234051	0.03271	-0.0933744	-0.150704	0.182234
288.6	1.50947	0.975528	0.549689	0.296994	0.0320067		288.6	0.23366	0.03253	-0.09366	-0.151408	0.182428
288.8	1.50979	0.976192	0.549628	0.297012	0.0317605		288.8	0.233417	0.0319904	-0.0937207	-0.151758	0.182156
289	1.51016	0.976604	0.549734	0.297182	0.031417		289	0.233356	0.0316661	-0.0939133	-0.15202	0.182433
289.2	1.51015	0.976594	0.549665	0.297406	0.0310653		289.2	0.232301	0.0309799	-0.094695	-0.152859	0.181823
289.4	1.51022	0.976495	0.550165	0.297793	0.0309463		289.4	0.23226	0.0307932	-0.094637	-0.153144	0.181964
289.6	1.51027	0.976694	0.55062	0.297747	0.031134		289.6	0.231523	0.0305618	-0.0947343	-0.153699	0.181731
289.8	1.51054	0.976865	0.550797	0.297911	0.0311997		289.8	0.231122	0.0306899	-0.0948945	-0.154	0.181257
290	1.511	0.977481	0.551139	0.298208	0.0314535		290	0.2312	0.0310873	-0.094717	-0.153947	0.181454
290.2	1.51137	0.97836	0.551343	0.298423	0.0319803		290.2	0.231757	0.0309699	-0.0945936	-0.15404	0.181777
290.4	1.51182	0.978523	0.550881	0.298041	0.0323212		290.4	0.231796	0.0310367	-0.0947843	-0.153666	0.181745
290.6	1.513	0.979396	0.551809	0.298214	0.0331342		290.6	0.231973	0.0312075	-0.0949363	-0.153236	0.181791
290.8	1.51366	0.979728	0.551857	0.298824	0.033454		290.8	0.232351	0.0313165	-0.0946807	-0.153322	0.182204
291	1.51463	0.980042	0.552249	0.299233	0.0339174		291	0.232799	0.0315432	-0.0943229	-0.152814	0.182565
291.2	1.51543	0.980383	0.552534	0.299457	0.0345147		291.2	0.233062	0.0316035	-0.0939841	-0.152588	0.182514
291.4	1.51603	0.980532	0.552145	0.299891	0.034736		291.4	0.233733	0.0323723	-0.0934624	-0.15209	0.183067
291.6	1.51607	0.981132	0.552394	0.300043	0.0351203		291.6	0.233701	0.0323693	-0.0940651	-0.152093	0.183301
291.8	1.51648	0.981197	0.552748	0.300962	0.0352924		291.8	0.233192	0.0317877	-0.0947423	-0.15285	0.182671
292	1.51648	0.980679	0.552491	0.301519	0.0351358		292	0.233119	0.0320163	-0.0948075	-0.153458	0.182766
292.2	1.51673	0.9808	0.552512	0.301708	0.0349908		292.2	0.23363	0.0317233	-0.0947482	-0.153406	0.183176
292.4	1.51725	0.98036	0.55246	0.301152	0.034443		292.4	0.2334	0.0311925	-0.0951952	-0.153748	0.183318
292.6	1.51767	0.980481	0.552549	0.30193	0.0345799		292.6	0.233123	0.030704	-0.0957887	-0.15395	0.183395
292.8	1.51777	0.980336	0.552682	0.301915	0.0345376		292.8	0.232999	0.0301757	-0.0956999	-0.154242	0.183216
293	1.51775	0.980242	0.552537	0.301897	0.0341766		293	0.232939	0.0297552	-0.0962225	-0.154939	0.183155
293.2	1.51757	0.979859	0.552133	0.301583	0.0334664		293.2	0.232669	0.0294549	-0.0967169	-0.155499	0.182948
293.4	1.51826	0.980122	0.552527	0.300985	0.0332168		293.4	0.232905	0.0298333	-0.0967511	-0.155439	0.183196
293.6	1.51837	0.980079	0.552583	0.300296	0.0329219		293.6	0.232143	0.0299326	-0.0968098	-0.156055	0.183381
293.8	1.51938	0.98073	0.553088	0.299651	0.0326128		293.8	0.231734	0.0294625	-0.0971486	-0.156529	0.183031
294	1.51986	0.98173	0.553643	0.299318	0.0325825		294	0.23176	0.0288209	-0.0973235	-0.156943	0.18294
294.2	1.52017	0.982227	0.553755	0.298747	0.0325071		294.2	0.232016	0.0287569	-0.09714	-0.156552	0.183165
294.4	1.52051	0.982199	0.553796	0.297848	0.0322798		294.4	0.231524	0.0283447	-0.0971942	-0.156537	0.183018
294.6	1.52172	0.982876	0.55497	0.2985	0.0327777		294.6	0.231829	0.0287774	-0.0970726	-0.156037	0.183016
294.8	1.5216	0.98328	0.555085	0.29867	0.032986		294.8	0.231706	0.0288755	-0.0969867	-0.155943	0.18273
295	1.52247	0.983782	0.556205	0.299116	0.0335449		295	0.232179	0.0296328	-0.0964618	-0.155305	0.18257
295.2	1.52263	0.984732	0.556359	0.299489	0.034124		295.2	0.232663	0.0301131	-0.0960625	-0.155177	0.182642
295.4	1.52266	0.985385	0.556864	0.300181	0.0347082		295.4	0.23281	0.0303138	-0.0962482	-0.155388	0.182874
295.6	1.52268	0.986199	0.557715	0.300481	0.03514		295.6	0.232313	0.0305257	-0.0967036	-0.155599	0.182678
295.8	1.52316	0.986552	0.558457	0.301335	0.0357307		295.8	0.232655	0.0306853	-0.0962009	-0.155561	0.182317
296	1.52277	0.986468	0.558277	0.301119	0.0358995		296	0.232625	0.0309995	-0.0958767	-0.155417	0.182473
296.2	1.52251	0.986444	0.558105	0.301139	0.0358845		296.2	0.233066	0.031351	-0.0954548	-0.154925	0.182868
296.4	1.52298	0.986	0.558303	0.301378	0.0356139		296.4	0.233334	0.032134	-0.0951989	-0.154565	0.183107
296.6	1.52359	0.987225	0.559317	0.302562	0.0363389		296.6	0.233258	0.0326433	-0.0951591	-0.15462	0.183367
296.8	1.52355	0.98742	0.559106	0.302239	0.036182		296.8	0.232965	0.0326794	-0.0955111	-0.15526	0.182883
297	1.52424	0.987757	0.558665	0.301984	0.036039		297	0.232918	0.0325962	-0.095665	-0.155552	0.182795
297.2	1.52452	0.987508	0.558295	0.301979	0.0355366		297.2	0.233144	0.0327637	-0.0957218	-0.15567	0.182853
297.4	1.52519	0.987799	0.558795	0.301864	0.0353932		297.4	0.233107	0.0323365	-0.0961669	-0.15618	0.182283
297.6	1.5255	0.987628	0.558653	0.301894	0.0347733		297.6	0.232711	0.0321731	-0.0962875	-0.156895	0.182603
297.8	1.52652	0.988017	0.559038	0.302037	0.0345256		297.8	0.232183	0.031357	-0.0969589	-0.157515	0.182298
298	1.52733	0.987704	0.558802	0.302652	0.0340956		298	0.231863	0.0309164	-0.0972282	-0.158218	0.182062
298.2	1.52795	0.98756	0.558354	0.303055	0.0337861		298.2	0.231926	0.0310949	-0.0972121	-0.158218	0.182214
298.4	1.52827	0.98701	0.558261	0.303364	0.0333236		298.4	0.231509	0.0307625	-0.0975443	-0.158498	0.182065
298.6	1.52918	0.987098	0.558805	0.303996	0.0331338		298.6	0.231466	0.0305681	-0.0982086	-0.158341	0.181631
298.8	1.52932	0.987213	0.558787	0.303948	0.0327988		298.8	0.231499	0.0300486	-0.0980882	-0.157909	0.181566
299	1.5305	0.987659	0.560035	0.305125	0.0332479		299	0.231759	0.0297801	-0.0981269	-0.157545	0.181643
299.2	1.53051	0.988191	0.560078	0.305625	0.0337029		299.2	0.232198	0.0297212	-0.098071	-0.156869	0.18221
299.4	1.53041	0.9884	0.560715	0.306164	0.0339093		299.4	0.231814	0.0300678	-0.0981002	-0.157	0.182306
299.6	1.53035	0.98818	0.560873	0.306226	0.0337156		299.6	0.232228	0.0304274	-0.0974173	-0.156865	0.182523
299.8	1.53078	0.988057	0.561329	0.306626	0.0339207		299.8	0.232436	0.0297885	-0.0974886	-0.157001	0.182106
300	1.53143	0.988309	0.561552	0.306649	0.0341638		300	0.232004	0.0297619	-0.0974028	-0.157416	0.182292
300.2	1.53208	0.988658	0.561586	0.306996	0.0341993		300.2	0.232521	0.0302759	-0.0971316	-0.157296	0.182566
300.4	1.53246	0.989327	0.562306	0.30687	0.0344086		300.4	0.23281	0.0304883	-0.0969248	-0.157323	0.182733
300.6	1.5325	0.990208	0.562241	0.307454	0.0344022		300.6	0.232274	0.0300775	-0.0972564	-0.158379	0.182246
300.8	1.53195	0.989723	0.561471	0.306242	0.033888		300.8	0.23212	0.029824	-0.0976254	-0.158611	0.182098
301	1.5319	0.989385	0.560775	0.305088	0.0334361		301	0.232273	0.0296106	-0.0973376	-0.159117	0.182202
301.2	1.53178	0.989798	0.560515	0.304616	0.0331637		301.2	0.232385	0.0293223	-0.097398	-0.159491	0.181874
301.4	1.53244	0.990708	0.560699	0.30413	0.0337213		301.4	0.231818	0.0287949	-0.0982104	-0.160522	0.181189
301.6	1.53315	0.991236	0.56044	0.304157	0.0335787		301.6	0.231861	0.0289042	-0.0983024	-0.160939	0.181947
301.8	1.53382	0.991619	0.56012	0.30427	0.0334274		301.8	0.231789	0.0284965	-0.0984785	-0.161359	0.181668
302	1.53462	0.991881	0.560136	0.304728	0.0332032		302	0.231724	0.0286114	-0.0983922	-0.161464	0.18168
302.2	1.53402	0.992217	0.559842	0.304568	0.0328797		302.2	0.232241	0.0290353	-0.0981619	-0.160908	0.181985
302.4	1.53432	0.99221	0.560118	0.304359	0.0327499		302.4	0.231668	0.0290472	-0.0982023	-0.160458	0.182113
302.6	1.53477	0.993087	0.560713	0.304781	0.0325518		302.6	0.231157	0.0289774	-0.0987283	-0.160283	0.181772
302.8	1.53512	0.993696	0.561017	0.304913	0.0329734		302.8	0.231572	0.0289607	-0.0982672	-0.159636	0.182375
303	1.5356	0.994032	0.561605	0.305686	0.0333531		303	0.231863	0.0291074	-0.0985728	-0.15919	0.1823
303.2	1.53551	0.993866	0.561652	0.305678	0.0332726		303.2	0.232276	0.0297719	-0.0982189	-0.158391	0.182898
303.4	1.53558	0.993792	0.562141	0.305803	0.0335321		303.4	0.232202	0.0301011	-0.0982991	-0.158533	0.18328
303.6	1.53575	0.993367	0.562613	0.305702	0.0335088		303.6	0.23241	0.0297712	-0.0982675	-0.158965	0.18321
303.8	1.53634	0.993849	0.563082	0.305902	0.0334277		303.8	0.232148	0.0295364	-0.0989771	-0.15917	0.183098
304	1.5369	0.994105	0.563232	0.305981	0.0333578		304	0.232114	0.0299715	-0.0992154	-0.159208	0.183299
304.2	1.53667	0.99409	0.563165	0.305924	0.0331803		304.2	0.232366	0.0301994	-0.0998564	-0.159433	0.183171
304.4	1.53673	0.993528	0.562985	0.305471	0.0325766		304.4	0.232101	0.0300102	-0.100131	-0.160007	0.182948
304.6	1.53668	0.992729	0.561883	0.304988	0.0317494		304.6	0.231478	0.0298973	-0.100708	-0.160856	0.182828
304.8	1.53672	0.992336	0.561641	0.304157	0.0314132		304.8	0.231579	0.0296962	-0.100715	-0.160915	0.183081
305	1.53675	0.9924	0.560874	0.303604	0.0309812		305	0.231543	0.0290636	-0.100895	-0.161842	0.182424
305.2	1.53739	0.993315	0.561278	0.304062	0.0314587		305.2	0.231437	0.0287364	-0.101151	-0.162106	0.181834
305.4	1.53808	0.993887	0.561503	0.304113	0.0317343		305.4	0.231428	0.0286853	-0.101672	-0.162983	0.181306
305.6	1.53937	0.994134	0.561552	0.304623	0.0318225		305.6	0.231409	0.0279957	-0.102027	-0.163279	0.181034
305.8	1.54041	0.994701	0.56224	0.305248	0.0322593		305.8	0.230922	0.0276041	-0.102081	-0.163701	0.180341
306	1.54166	0.995451	0.562959	0.305892	0.0323914		306	0.231046	0.0276961	-0.101561	-0.163446	0.180622
306.2	1.54179	0.995901	0.56283	0.305661	0.0326774		306.2	0.231029	0.027713	-0.101355	-0.163331	0.18048
306.4	1.54249	0.996213	0.563185	0.305912	0.033081		306.4	0.23041	0.0278671	-0.100901	-0.163302	0.180348
306.6	1.54268	0.9965	0.563575	0.306052	0.0331354		306.6	0.230379	0.0277258	-0.100876	-0.163137	0.180311
306.8	1.54322	0.996477	0.563851	0.305717	0.0335976		306.8	0.230613	0.027353	-0.100408	-0.163124	0.180188
307	1.54367	0.996362	0.564066	0.305771	0.033274		307	0.230937	0.0275538	-0.0999824	-0.162755	0.180391
307.2	1.54347	0.996145	0.564337	0.305526	0.0332293		307.2	0.230836	0.0277952	-0.0993652	-0.162669	0.18111
307.4	1.54378	0.996693	0.565006	0.305512	0.0335041		307.4	0.230865	0.0276231	-0.0996251	-0.16265	0.181367
307.6	1.54393	0.996912	0.564857	0.305189	0.0332167		307.6	0.230765	0.0274804	-0.0998358	-0.163032	0.181298
307.8	1.54418	0.997243	0.564848	0.30495	0.0329764		307.8	0.230938	0.0276279	-0.0999893	-0.162832	0.181626
308	1.5446	0.996941	0.564786	0.304495	0.0328407		308	0.231004	0.0280692	-0.100166	-0.162357	0.181866
308.2	1.54458	0.997087	0.565104	0.304676	0.0329476		308.2	0.231416	0.0281648	-0.100081	-0.162012	0.18222
308.4	1.54491	0.996743	0.564796	0.304623	0.0325998		308.4	0.231414	0.0279722	-0.0998094	-0.161863	0.182969
308.6	1.54427	0.996526	0.564267	0.304754	0.0325031		308.6	0.231731	0.0281376	-0.099627	-0.161328	0.183419
308.8	1.54445	0.997	0.564629	0.305644	0.0326466		308.8	0.232112	0.02761	-0.0997869	-0.160925	0.183607
309	1.54414	0.997307	0.564712	0.305768	0.0326709		309	0.232641	0.0273066	-0.100004	-0.160523	0.183664
309.2	1.5452	0.997612	0.565559	0.306401	0.032932		309.2	0.232908	0.0280036	-0.100776	-0.159841	0.18372
309.4	1.54592	0.997818	0.56561	0.306817	0.0327476		309.4	0.233401	0.0281661	-0.101067	-0.159857	0.183929
309.6	1.54722	0.998536	0.566352	0.307755	0.0333611		309.6	0.233503	0.0275859	-0.10139	-0.159642	0.18382
309.8	1.54786	0.999184	0.56715	0.308653	0.0336628		309.8	0.233655	0.0272141	-0.101582	-0.159584	0.183777
310	1.54841	0.999861	0.567114	0.309297	0.0340852		310	0.233862	0.0269807	-0.101521	-0.159483	0.183541
310.2	1.54842	1.00055	0.567478	0.309919	0.0347515		310.2	0.233483	0.0266703	-0.101823	-0.159898	0.183096
310.4	1.54862	1.00071	0.56784	0.310529	0.0352509		310.4	0.232741	0.0262507	-0.102092	-0.161005	0.182401
310.6	1.54866	1.00113	0.567812	0.310424	0.0352308		310.6	0.232763	0.0253331	-0.102689	-0.161782	0.181563
310.8	1.54889	1.00103	0.568015	0.310543	0.0351755		310.8	0.232828	0.0252159	-0.102818	-0.162467	0.18087
311	1.54879	1.00105	0.567794	0.3107	0.0348053		311	0.232421	0.0251212	-0.102892	-0.163031	0.180686
311.2	1.54859	1.0014	0.567803	0.310708	0.0344242		311.2	0.232224	0.0253198	-0.102689	-0.163649	0.180273
311.4	1.54916	1.00215	0.567943	0.310674	0.0342888		311.4	0.231747	0.0251162	-0.103306	-0.16398	0.17943
311.6	1.54957	1.00238	0.567604	0.310163	0.0339578		311.6	0.231483	0.0250107	-0.103362	-0.16484	0.178947
311.8	1.5505	1.00242	0.568157	0.310024	0.0340836		311.8	0.231067	0.0247132	-0.103248	-0.165248	0.178612
312	1.5511	1.00221	0.568263	0.309746	0.0340887		312	0.230771	0.0248436	-0.103048	-0.165291	0.178661
312.2	1.5516	1.00237	0.568349	0.310028	0.0342092		312.2	0.230443	0.0243398	-0.102905	-0.165411	0.178768
312.4	1.55189	1.00243	0.568093	0.309875	0.0340328		312.4	0.230062	0.0246063	-0.102941	-0.16561	0.179086
312.6	1.5525	1.0024	0.567844	0.310045	0.034236		312.6	0.230023	0.0251591	-0.102765	-0.16504	0.179232
312.8	1.55375	1.00301	0.568874	0.310837	0.0349071		312.8	0.229874	0.025293	-0.10308	-0.16505	0.179495
313	1.55445	1.00269	0.56923	0.310558	0.0348913		313	0.229856	0.0257507	-0.102824	-0.164958	0.179578
313.2	1.55518	1.00306	0.569323	0.310515	0.0348965		313.2	0.229859	0.0261761	-0.103407	-0.164663	0.179781
313.4	1.55546	1.00365	0.569302	0.310675	0.034633		313.4	0.230618	0.0262163	-0.103386	-0.16482	0.180269
313.6	1.55626	1.00426	0.570073	0.310773	0.0353434		313.6	0.231014	0.0265144	-0.103427	-0.164485	0.180465
313.8	1.55674	1.0044	0.570269	0.311022	0.0356067		313.8	0.230983	0.0264632	-0.103476	-0.164171	0.180683
314	1.55724	1.00553	0.571049	0.311724	0.0362562		314	0.231355	0.0267833	-0.102942	-0.163995	0.18107
314.2	1.55725	1.00604	0.571578	0.312503	0.0364477		314.2	0.232189	0.0270037	-0.102617	-0.163862	0.181851
314.4	1.55692	1.00618	0.571388	0.312523	0.0361483		314.4	0.232474	0.0267444	-0.102734	-0.164312	0.181886
314.6	1.55691	1.00629	0.571323	0.312402	0.0357995		314.6	0.233493	0.0268134	-0.102746	-0.164113	0.181919
314.8	1.55716	1.00655	0.571763	0.31294	0.0356605		314.8	0.233428	0.026749	-0.102876	-0.164285	0.182205
315	1.55727	1.00716	0.571832	0.313132	0.0353666		315	0.233228	0.0268333	-0.10276	-0.164575	0.182638
315.2	1.55724	1.00713	0.571277	0.312428	0.0345611		315.2	0.233462	0.0267717	-0.102691	-0.164846	0.182467
315.4	1.55732	1.00706	0.571086	0.312426	0.0342875		315.4	0.232805	0.0259855	-0.103627	-0.165577	0.181907
315.6	1.55825	1.00722	0.57129	0.312524	0.0344417		315.6	0.232473	0.0253435	-0.1037	-0.16637	0.181738
315.8	1.55832	1.00707	0.571314	0.312309	0.0343696		315.8	0.231881	0.0249541	-0.103903	-0.166441	0.181938
316	1.55817	1.00663	0.570928	0.312258	0.0341382		316	0.231553	0.0247708	-0.103743	-0.166805	0.18234
316.2	1.55804	1.00643	0.570586	0.312079	0.03369		316.2	0.231063	0.0249018	-0.103817	-0.167115	0.182359
316.4	1.55836	1.00685	0.570583	0.312054	0.0334789		316.4	0.230852	0.0255043	-0.103805	-0.166847	0.182733
316.6	1.55876	1.00674	0.570776	0.311955	0.0334351		316.6	0.230551	0.0255309	-0.1039	-0.167292	0.182967
316.8	1.55907	1.00736	0.571399	0.312657	0.0337193		316.8	0.230407	0.0255976	-0.104039	-0.167769	0.182692
317	1.55893	1.0072	0.57104	0.312207	0.0332663		317	0.230234	0.0257217	-0.104078	-0.168069	0.182906
317.2	1.55873	1.00735	0.570644	0.311747	0.0328439		317.2	0.230534	0.025927	-0.104384	-0.167662	0.183118
317.4	1.55837	1.00685	0.570582	0.311389	0.0320307		317.4	0.230832	0.0265927	-0.104185	-0.167481	0.183704
317.6	1.5586	1.00671	0.570942	0.310914	0.0321257		317.6	0.231029	0.0269284	-0.103534	-0.167131	0.184113
317.8	1.55886	1.00717	0.571463	0.311131	0.0322535		317.8	0.23086	0.0270406	-0.103432	-0.166492	0.183757
318	1.56004	1.00856	0.572208	0.312172	0.0328283		318	0.231313	0.0274039	-0.10327	-0.166352	0.183989
318.2	1.56053	1.00877	0.572393	0.312684	0.0330986		318.2	0.231706	0.0271905	-0.103418	-0.166212	0.183916
318.4	1.56091	1.00906	0.572542	0.312556	0.0333608		318.4	0.231644	0.0265033	-0.103948	-0.166568	0.183427
318.6	1.56229	1.0095	0.573082	0.313327	0.0341804		318.6	0.232015	0.026588	-0.104082	-0.166427	0.183601
318.8	1.56301	1.00978	0.573258	0.313971	0.0345674		318.8	0.231758	0.0262208	-0.104453	-0.166242	0.183378
319	1.5635	1.00986	0.573602	0.313962	0.0347682		319	0.231991	0.0261886	-0.104943	-0.166002	0.182967
319.2	1.56355	1.01021	0.573593	0.314515	0.0351002		319.2	0.231983	0.0253718	-0.105818	-0.166105	0.181993
319.4	1.56455	1.01078	0.574095	0.315309	0.0355368		319.4	0.231651	0.0252785	-0.105913	-0.166121	0.182059
319.6	1.56497	1.01092	0.574435	0.315486	0.0353675		319.6	0.231442	0.0251191	-0.105537	-0.166039	0.181977
319.8	1.5645	1.01074	0.574566	0.314516	0.0347406		319.8	0.231452	0.0251132	-0.105704	-0.165992	0.181946
320	1.56474	1.01071	0.575219	0.314831	0.034837		320	0.231535	0.0249415	-0.1057	-0.166439	0.181505
320.2	1.56465	1.01098	0.575244	0.314483	0.0347225		320.2	0.231802	0.0253889	-0.105794	-0.166109	0.181598
320.4	1.56533	1.01185	0.575403	0.315018	0.0347879		320.4	0.231834	0.0254376	-0.1058	-0.165906	0.181588
320.6	1.56513	1.01191	0.575376	0.315087	0.0344097		320.6	0.232285	0.0255767	-0.105695	-0.165969	0.181916
320.8	1.56552	1.01251	0.575246	0.315194	0.0340837		320.8	0.232817	0.0263687	-0.105309	-0.165623	0.182194
321	1.56563	1.01243	0.575099	0.314573	0.0335534		321	0.232838	0.0266604	-0.105046	-0.165593	0.182567
321.2	1.56575	1.01229	0.574517	0.313805	0.0329363		321.2	0.232558	0.0265721	-0.105185	-0.166019	0.182341
321.4	1.56556	1.01208	0.574714	0.313625	0.0325911		321.4	0.232175	0.0265078	-0.105457	-0.166477	0.18227
321.6	1.56586	1.01251	0.574324	0.313144	0.0324443		321.6	0.231597	0.0259071	-0.105225	-0.166819	0.181899
321.8	1.56651	1.01273	0.574364	0.313103	0.0323059		321.8	0.230806	0.025743	-0.106013	-0.167422	0.181268
322	1.56715	1.01324	0.574147	0.313181	0.0321428		322	0.230214	0.0251024	-0.106403	-0.1683	0.181214
322.2	1.56683	1.01304	0.574117	0.312468	0.032198		322.2	0.230351	0.0250494	-0.106163	-0.168324	0.181584
322.4	1.56686	1.01311	0.574153	0.31229	0.0324822		322.4	0.230427	0.024819	-0.106294	-0.168791	0.181583
322.6	1.56755	1.01345	0.57445	0.312837	0.0328723		322.6	0.230737	0.0252656	-0.105854	-0.168406	0.182101
322.8	1.56762	1.01352	0.574466	0.312246	0.0328573		322.8	0.230833	0.0252054	-0.105966	-0.168684	0.182068
323	1.56777	1.01388	0.574721	0.312218	0.032562		323	0.230672	0.0249152	-0.106342	-0.168549	0.182252
323.2	1.56766	1.0136	0.574445	0.312351	0.0322721		323.2	0.230596	0.0249324	-0.106379	-0.168677	0.182643
323.4	1.56821	1.01308	0.574324	0.311838	0.0318768		323.4	0.231049	0.0252322	-0.105886	-0.168592	0.183421
323.6	1.56846	1.01296	0.57484	0.312189	0.0318847		323.6	0.231072	0.0251189	-0.106069	-0.168987	0.183182
323.8	1.56883	1.0129	0.575185	0.312071	0.0320518		323.8	0.231003	0.0249438	-0.106563	-0.169684	0.182845
324	1.56917	1.01259	0.575483	0.312784	0.0326428		324	0.231602	0.0251383	-0.106437	-0.169661	0.182967
324.2	1.56986	1.01311	0.575264	0.313405	0.0328953		324.2	0.232204	0.0253671	-0.106215	-0.169391	0.18337
324.4	1.57101	1.01404	0.575543	0.314503	0.0331128		324.4	0.23267	0.0254121	-0.105753	-0.169319	0.183382
324.6	1.57151	1.01428	0.576096	0.314926	0.0334913		324.6	0.233198	0.0253987	-0.10602	-0.168827	0.183448
324.8	1.57207	1.01469	0.576228	0.315186	0.0336438		324.8	0.233686	0.0258332	-0.105694	-0.168769	0.18348
325	1.57307	1.01567	0.577006	0.315897	0.0344764		325	0.233818	0.0256502	-0.105643	-0.169165	0.183225
325.2	1.57363	1.01645	0.577432	0.316628	0.034964		325.2	0.233574	0.0254208	-0.106025	-0.169169	0.18323
325.4	1.57362	1.01656	0.577963	0.317405	0.0351959		325.4	0.233097	0.0249496	-0.106561	-0.169118	0.183107
325.6	1.57371	1.01704	0.578021	0.317239	0.0348478		325.6	0.232705	0.024659	-0.106278	-0.168901	0.183048
325.8	1.57413	1.01727	0.578536	0.316945	0.0346114		325.8	0.232659	0.0247891	-0.106727	-0.168927	0.182838
326	1.57391	1.01737	0.578191	0.316496	0.0342019		326	0.23264	0.0244547	-0.106602	-0.16885	0.182837
326.2	1.5741	1.01753	0.578547	0.316298	0.0345282		326.2	0.233141	0.0250019	-0.106055	-0.168039	0.183319
326.4	1.57453	1.01783	0.57899	0.31658	0.0347934		326.4	0.232818	0.0245956	-0.106301	-0.168287	0.182901
326.6	1.57522	1.01819	0.579556	0.316855	0.0351368		326.6	0.232568	0.0240669	-0.107049	-0.168406	0.182922
326.8	1.57535	1.01818	0.579594	0.316479	0.0348144		326.8	0.232073	0.0236583	-0.107625	-0.168858	0.182907
327	1.57586	1.0179	0.579692	0.316406	0.0345819		327	0.231521	0.022993	-0.108123	-0.169022	0.182923
327.2	1.57602	1.01761	0.57958	0.316169	0.0342133		327.2	0.231143	0.0225758	-0.108624	-0.169935	0.182705
327.4	1.57737	1.01796	0.580209	0.316588	0.0348708		327.4	0.23066	0.0221205	-0.109086	-0.170376	0.182371
327.6	1.57804	1.01849	0.580977	0.317274	0.0352578		327.6	0.230117	0.0217286	-0.109585	-0.171399	0.182153
327.8	1.57833	1.01824	0.580663	0.316744	0.0347864		327.8	0.229473	0.0211559	-0.110013	-0.172081	0.181525
328	1.57923	1.0186	0.580964	0.316835	0.0348666		328	0.229432	0.0211217	-0.110158	-0.17229	0.181444
328.2	1.57979	1.01942	0.581012	0.316932	0.0346889		328.2	0.22971	0.0207603	-0.109897	-0.172084	0.181361
328.4	1.57995	1.01935	0.580908	0.316733	0.0343833		328.4	0.229177	0.0201346	-0.110381	-0.172278	0.180825
328.6	1.58003	1.01972	0.581554	0.316832	0.0347323		328.6	0.228923	0.0196378	-0.110946	-0.172255	0.180493
328.8	1.58009	1.01992	0.581224	0.317079	0.0345098		328.8	0.228683	0.0195271	-0.11096	-0.172683	0.180382
329	1.58107	1.02072	0.581585	0.317631	0.0347008		329	0.228117	0.0194117	-0.111317	-0.173372	0.180273
329.2	1.58098	1.0207	0.581187	0.317913	0.0340562		329.2	0.227791	0.0191693	-0.111466	-0.173171	0.180397
329.4	1.58094	1.02104	0.581487	0.317814	0.0339405		329.4	0.227842	0.0189526	-0.11172	-0.17305	0.180447
329.6	1.58103	1.02098	0.581335	0.317742	0.0333425		329.6	0.228065	0.0192593	-0.111245	-0.172761	0.180157
329.8	1.58083	1.0209	0.581163	0.317547	0.033042		329.8	0.228374	0.0198321	-0.110835	-0.172196	0.180496
330	1.57997	1.02034	0.580572	0.317414	0.0325527		330	0.228871	0.0200584	-0.110338	-0.171951	0.180641
330.2	1.5796	1.02048	0.580682	0.317644	0.0327511		330.2	0.229191	0.0203942	-0.110093	-0.171974	0.180292
330.4	1.57968	1.02064	0.581422	0.318039	0.0333997		330.4	0.22943	0.0203945	-0.110531	-0.172679	0.180249
330.6	1.57989	1.02068	0.581794	0.318231	0.0337478		330.6	0.230007	0.0202934	-0.1103	-0.172603	0.180501
330.8	1.58006	1.02081	0.581828	0.318133	0.0339886		330.8	0.23016	0.0205323	-0.109626	-0.172686	0.180743
331	1.58061	1.02138	0.582602	0.318635	0.0345072		331	0.230716	0.0207534	-0.109034	-0.17279	0.181335
331.2	1.58103	1.02219	0.583292	0.319061	0.0346971		331.2	0.230562	0.0209093	-0.109256	-0.172503	0.181637
331.4	1.58173	1.023	0.583508	0.319277	0.0349937		331.4	0.230214	0.0213243	-0.109304	-0.172432	0.181687
331.6	1.5821	1.02354	0.583906	0.319003	0.0344857		331.6	0.230677	0.0216991	-0.108888	-0.17194	0.182331
331.8	1.58268	1.02355	0.583723	0.318335	0.0337001		331.8	0.230383	0.0216011	-0.109144	-0.171844	0.182077
332	1.58355	1.02386	0.583994	0.318372	0.033556		332	0.231189	0.0219466	-0.109005	-0.171603	0.182687
332.2	1.58386	1.02397	0.584076	0.318493	0.0333565		332.2	0.231965	0.0217628	-0.108759	-0.171241	0.182701
332.4	1.58465	1.02393	0.584075	0.318594	0.0330063		332.4	0.231425	0.0211236	-0.109439	-0.172046	0.182516
332.6	1.58481	1.02456	0.584216	0.318862	0.0328032		332.6	0.231413	0.020681	-0.109562	-0.172411	0.182456
332.8	1.58587	1.02497	0.584146	0.319728	0.0327157		332.8	0.230922	0.0202498	-0.110111	-0.173626	0.181984
333	1.58713	1.02539	0.58438	0.320135	0.0330354		333	0.231195	0.0203784	-0.10979	-0.173868	0.182323
333.2	1.58687	1.02531	0.584146	0.320236	0.0326936		333.2	0.231289	0.0201375	-0.109992	-0.174091	0.182472
333.4	1.5871	1.0255	0.584478	0.320264	0.033209		333.4	0.231374	0.0200429	-0.110597	-0.173902	0.182244
333.6	1.58719	1.02505	0.584361	0.320573	0.0331304		333.6	0.231113	0.0202603	-0.110879	-0.17425	0.181646
333.8	1.58689	1.02506	0.584607	0.320562	0.0336851		333.8	0.231028	0.0201884	-0.111248	-0.174468	0.181155
334	1.58714	1.02488	0.584652	0.32044	0.0338973		334	0.230866	0.0201271	-0.111342	-0.174557	0.18071
334.2	1.58763	1.02551	0.585107	0.320902	0.0345336		334.2	0.231096	0.0202168	-0.111341	-0.17474	0.180422
334.4	1.58815	1.02576	0.585905	0.321067	0.0353686		334.4	0.23089	0.0205238	-0.111649	-0.174773	0.180762
334.6	1.58889	1.02604	0.586451	0.321696	0.0356978		334.6	0.230777	0.0207779	-0.111334	-0.174186	0.180914
334.8	1.58912	1.02608	0.5866	0.321635	0.0357778		334.8	0.230405	0.0210206	-0.111196	-0.174168	0.181232
335	1.58936	1.02644	0.587221	0.322019	0.035993		335	0.230714	0.021642	-0.110858	-0.173936	0.181835
335.2	1.58972	1.02652	0.587121	0.321553	0.0358421		335.2	0.229856	0.0216884	-0.111116	-0.173817	0.181644
335.4	1.59017	1.0267	0.587155	0.321405	0.0357849		335.4	0.229448	0.0221002	-0.11109	-0.173943	0.181411
335.6	1.59093	1.02648	0.587392	0.321297	0.0359387		335.6	0.229831	0.0220593	-0.11071	-0.173521	0.181767
335.8	1.5919	1.0269	0.587657	0.321959	0.0364079		335.8	0.229975	0.0222917	-0.110911	-0.173669	0.181723
336	1.59216	1.02733	0.587414	0.322351	0.036524		336	0.230726	0.0223523	-0.11069	-0.173692	0.181973
336.2	1.59219	1.02761	0.587163	0.322507	0.0366018		336.2	0.230752	0.0220865	-0.110924	-0.174436	0.181751
336.4	1.59207	1.02769	0.586703	0.322432	0.0361392		336.4	0.230459	0.0219908	-0.110954	-0.174682	0.181773
336.6	1.5915	1.02792	0.586392	0.322163	0.0358846		336.6	0.230162	0.0215591	-0.111249	-0.175276	0.181089
336.8	1.59226	1.02845	0.586391	0.322779	0.0358039		336.8	0.230454	0.0218981	-0.11102	-0.175502	0.181065
337	1.59188	1.02822	0.585725	0.322056	0.0354696		337	0.230359	0.0219325	-0.111244	-0.175231	0.181227
337.2	1.5914	1.02831	0.585191	0.321804	0.034903		337.2	0.229929	0.0212257	-0.112001	-0.175855	0.180989
337.4	1.59146	1.02844	0.584915	0.321489	0.034487		337.4	0.229365	0.0204513	-0.112722	-0.175875	0.180236
337.6	1.5922	1.02895	0.585182	0.321931	0.0343362		337.6	0.228946	0.0201611	-0.113159	-0.176035	0.179889
337.8	1.59289	1.0296	0.585905	0.32205	0.034695		337.8	0.22906	0.0201533	-0.11341	-0.175979	0.179981
338	1.59341	1.02971	0.585961	0.322309	0.0342206		338	0.229252	0.020333	-0.113327	-0.175764	0.180326
338.2	1.59429	1.03074	0.587	0.323278	0.0346444		338.2	0.229863	0.0203338	-0.113542	-0.175787	0.180488
338.4	1.59458	1.03025	0.587482	0.32304	0.034292		338.4	0.229965	0.0202252	-0.113611	-0.176197	0.18072
338.6	1.59517	1.02993	0.588518	0.32369	0.0340731		338.6	0.230192	0.0201027	-0.113694	-0.176161	0.180558
338.8	1.5952	1.02966	0.588598	0.323387	0.0335087		338.8	0.230432	0.0198069	-0.113676	-0.176579	0.180141
339	1.59536	1.02962	0.588828	0.323438	0.0335174		339	0.231053	0.0200964	-0.113207	-0.176562	0.179983
339.2	1.59607	1.02954	0.589163	0.323545	0.0336121		339.2	0.231165	0.0202475	-0.113191	-0.176547	0.180137
339.4	1.59682	1.02937	0.589606	0.323694	0.0340239		339.4	0.231503	0.0201512	-0.113175	-0.176418	0.180485
339.6	1.59714	1.02951	0.589639	0.324089	0.0343439		339.6	0.231997	0.0204343	-0.112611	-0.176188	0.18113
339.8	1.59746	1.02995	0.589989	0.32469	0.034615		339.8	0.232485	0.0211743	-0.11223	-0.175658	0.181651
340	1.59675	1.02979	0.589528	0.324523	0.0341976		340	0.232889	0.0212276	-0.111976	-0.175486	0.18176
340.2	1.59669	1.02985	0.589146	0.324443	0.0340267		340.2	0.232963	0.0214274	-0.111848	-0.175335	0.18208
340.4	1.59658	1.03003	0.589237	0.324602	0.0337895		340.4	0.233085	0.0218662	-0.111358	-0.17458	0.182494
340.6	1.59602	1.03023	0.588722	0.323941	0.0334733		340.6	0.232979	0.0220135	-0.111436	-0.174227	0.182774
340.8	1.59608	1.03036	0.587988	0.323855	0.0331371		340.8	0.232943	0.022031	-0.111233	-0.173812	0.183498
341	1.59627	1.03064	0.587435	0.323356	0.0331826		341	0.23222	0.0215806	-0.111531	-0.174149	0.183539
341.2	1.5966	1.03052	0.587112	0.323561	0.0331714		341.2	0.232157	0.0212819	-0.111772	-0.174342	0.183737
341.4	1.59707	1.03071	0.586857	0.323702	0.0333537		341.4	0.231305	0.0209295	-0.112644	-0.174663	0.183437
341.6	1.5982	1.03164	0.587363	0.324409	0.0341362		341.6	0.230966	0.0205608	-0.113127	-0.17496	0.183394
341.8	1.5982	1.03187	0.587766	0.324299	0.0345708		341.8	0.2312	0.0206538	-0.113074	-0.175287	0.183471
342	1.5985	1.03191	0.587721	0.324738	0.034788		342	0.231209	0.0200328	-0.113563	-0.176141	0.182955
342.2	1.59943	1.03252	0.588534	0.325056	0.0352292		342.2	0.231399	0.0198038	-0.113628	-0.176629	0.182452
342.4	1.59982	1.03236	0.589387	0.324863	0.0351836		342.4	0.231067	0.0197651	-0.113822	-0.177119	0.18196
342.6	1.60039	1.03304	0.590031	0.325185	0.0354631		342.6	0.230275	0.0195614	-0.114666	-0.177549	0.181156
342.8	1.60072	1.03375	0.590415	0.32516	0.0355593		342.8	0.230463	0.0200492	-0.114947	-0.177771	0.18086
343	1.60059	1.03377	0.590366	0.324918	0.0354276		343	0.230492	0.0203739	-0.115029	-0.178078	0.180985
343.2	1.60136	1.03441	0.590904	0.325249	0.0355027		343.2	0.2302	0.0201153	-0.11546	-0.178338	0.18103
343.4	1.60167	1.03461	0.591317	0.325316	0.0355098		343.4	0.230074	0.019636	-0.115473	-0.178492	0.18093
343.6	1.60228	1.03537	0.592285	0.325979	0.0356552		343.6	0.230287	0.0196046	-0.115375	-0.178133	0.181202
343.8	1.60298	1.03556	0.592444	0.32624	0.0351689		343.8	0.230276	0.0195381	-0.115233	-0.178042	0.180888
344	1.60397	1.03597	0.592665	0.326526	0.0352142		344	0.230289	0.0196226	-0.1149	-0.177626	0.180928
344.2	1.60431	1.03619	0.592407	0.326749	0.0346882		344.2	0.230452	0.0195151	-0.114897	-0.177848	0.181304
344.4	1.60424	1.03593	0.592593	0.326733	0.0343007		344.4	0.230526	0.0189944	-0.115001	-0.177745	0.181454
344.6	1.60408	1.03586	0.592291	0.32663	0.0340328		344.6	0.230488	0.0187563	-0.115129	-0.177512	0.181433
344.8	1.60439	1.03553	0.591755	0.326397	0.0338924		344.8	0.230438	0.0182657	-0.11504	-0.177934	0.181426
345	1.60489	1.03587	0.591958	0.326578	0.0338019		345	0.230618	0.0182622	-0.114943	-0.177968	0.181216
345.2	1.60453	1.03572	0.591623	0.326293	0.0339257		345.2	0.230671	0.0180643	-0.115153	-0.17828	0.181215
345.4	1.60532	1.03648	0.591878	0.326623	0.0347679		345.4	0.230312	0.0178943	-0.115151	-0.178436	0.181125
345.6	1.60513	1.03629	0.59185	0.32646	0.0345853		345.6	0.230481	0.0176078	-0.115283	-0.178512	0.181084
345.8	1.60485	1.0354	0.591673	0.32591	0.0342545		345.8	0.230782	0.0175648	-0.115211	-0.179276	0.180873
346	1.60567	1.03541	0.591817	0.326309	0.0344512		346	0.230534	0.017285	-0.115356	-0.179924	0.180392
346.2	1.60607	1.03553	0.592086	0.326578	0.0345668		346.2	0.230445	0.0176139	-0.115194	-0.180139	0.179942
346.4	1.60607	1.03607	0.59241	0.326759	0.0348152		346.4	0.229887	0.0179934	-0.11554	-0.180086	0.180025
346.6	1.60577	1.03632	0.59234	0.327161	0.0345933		346.6	0.229613	0.0186557	-0.115777	-0.180132	0.18018
346.8	1.60591	1.03672	0.592515	0.327202	0.0345939		346.8	0.229949	0.0196784	-0.115876	-0.180137	0.180591
347	1.60664	1.03708	0.593	0.327882	0.0348362		347	0.22984	0.019446	-0.116524	-0.180787	0.179941
347.2	1.60741	1.03792	0.593495	0.328329	0.0352252		347.2	0.229369	0.0187563	-0.117185	-0.180861	0.179407
347.4	1.60807	1.03827	0.594433	0.329328	0.0361238		347.4	0.229305	0.0185882	-0.117324	-0.181131	0.179465
347.6	1.60945	1.03879	0.595279	0.32976	0.0364036		347.6	0.229261	0.0185886	-0.117232	-0.180711	0.179289
347.8	1.61023	1.03949	0.595663	0.330564	0.0366357		347.8	0.22898	0.0188795	-0.117368	-0.180675	0.178803
348	1.61132	1.04048	0.596295	0.331214	0.0378243		348	0.229348	0.019131	-0.117522	-0.180153	0.179265
348.2	1.61113	1.04061	0.596521	0.331296	0.0374107		348.2	0.229423	0.0187274	-0.117751	-0.180428	0.17944
348.4	1.6113	1.0409	0.596851	0.330956	0.0375189		348.4	0.229255	0.0184336	-0.117409	-0.180108	0.179749
348.6	1.61152	1.04171	0.597138	0.331154	0.0376829		348.6	0.229672	0.0190455	-0.117194	-0.179917	0.179956
348.8	1.61208	1.0426	0.597642	0.330888	0.0381613		348.8	0.229609	0.018839	-0.11684	-0.180016	0.180505
349	1.61277	1.04374	0.59848	0.331247	0.0384957		349	0.229461	0.0184056	-0.116657	-0.179813	0.180714
349.2	1.61314	1.0443	0.598531	0.330927	0.0387574		349.2	0.229893	0.0180116	-0.116287	-0.180077	0.181069
349.4	1.61403	1.04483	0.599023	0.331099	0.0390759		349.4	0.230021	0.0177428	-0.116544	-0.180177	0.18119
349.6	1.61424	1.04419	0.598881	0.330945	0.0384734		349.6	0.230379	0.0173431	-0.117244	-0.180817	0.181349
349.8	1.61483	1.04426	0.598793	0.33083	0.038365		349.8	0.230262	0.0167278	-0.117254	-0.181767	0.18107
350	1.61503	1.04444	0.598243	0.330929	0.0379571		350	0.230828	0.0171669	-0.116474	-0.180978	0.181447
350.2	1.61472	1.04394	0.597662	0.330507	0.037308		350.2	0.231876	0.017488	-0.116073	-0.18047	0.181718
350.4	1.61412	1.04354	0.597268	0.330499	0.0367313		350.4	0.232325	0.0178112	-0.115979	-0.179784	0.18224
350.6	1.6142	1.04291	0.59706	0.330412	0.0358831		350.6	0.232947	0.0183222	-0.115928	-0.179479	0.182623
350.8	1.61422	1.04247	0.596644	0.329865	0.0351921		350.8	0.23361	0.018319	-0.116126	-0.179639	0.182684
351	1.61383	1.04235	0.596832	0.330113	0.0351095		351	0.234048	0.0182761	-0.116598	-0.179668	0.182251
351.2	1.61382	1.04194	0.596433	0.33	0.0345657		351.2	0.234215	0.0184791	-0.11665	-0.179339	0.182604
351.4	1.61354	1.04176	0.596688	0.330934	0.0344559		351.4	0.234582	0.0188988	-0.116266	-0.179184	0.18262
351.6	1.61376	1.04151	0.596458	0.330148	0.0338595		351.6	0.234828	0.0192084	-0.11645	-0.178882	0.182539
351.8	1.61347	1.0419	0.596551	0.330557	0.0341205		351.8	0.234789	0.019461	-0.116795	-0.178718	0.182739
352	1.6134	1.042	0.596249	0.330547	0.034339		352	0.234752	0.0198378	-0.116449	-0.178938	0.182915
352.2	1.61346	1.04202	0.596406	0.330286	0.0339012		352.2	0.234148	0.0200699	-0.115921	-0.179202	0.182935
352.4	1.61357	1.04225	0.596219	0.329811	0.033581		352.4	0.233559	0.0202032	-0.115418	-0.179629	0.182887
352.6	1.61354	1.04247	0.596727	0.32991	0.0337467		352.6	0.232945	0.0198345	-0.115865	-0.180161	0.182313
352.8	1.61428	1.04288	0.597112	0.329983	0.0341609		352.8	0.23234	0.0192671	-0.115482	-0.180388	0.182256
353	1.61481	1.04349	0.597617	0.330271	0.0345184		353	0.232067	0.0186648	-0.115332	-0.180861	0.18174
353.2	1.61595	1.04424	0.59828	0.330834	0.0352564		353.2	0.232015	0.0186529	-0.115229	-0.181285	0.18146
353.4	1.61673	1.04485	0.598668	0.330815	0.0356616		353.4	0.23121	0.0183623	-0.115686	-0.181894	0.181213
353.6	1.61754	1.04469	0.59875	0.331398	0.0358975		353.6	0.230998	0.0181828	-0.115659	-0.182371	0.18118
353.8	1.61831	1.0454	0.599174	0.331671	0.0364317		353.8	0.23087	0.0182969	-0.115345	-0.182043	0.181066
354	1.61821	1.04515	0.599193	0.33195	0.0365553		354	0.231285	0.0184218	-0.114941	-0.181522	0.181353
354.2	1.6188	1.04529	0.599538	0.332016	0.0367291		354.2	0.231552	0.0183193	-0.115094	-0.181118	0.181287
354.4	1.6189	1.04574	0.599903	0.332602	0.0372766		354.4	0.231389	0.017978	-0.115612	-0.181441	0.181355
354.6	1.61908	1.04589	0.599939	0.332391	0.0371129		354.6	0.231646	0.0179696	-0.115682	-0.181346	0.181442
354.8	1.61938	1.04633	0.600575	0.332642	0.0373949		354.8	0.231969	0.0180709	-0.115977	-0.181383	0.181353
355	1.61918	1.04652	0.600776	0.332962	0.0373508		355	0.232847	0.0188147	-0.116109	-0.181128	0.181833
355.2	1.61942	1.04653	0.600615	0.332617	0.0372356		355.2	0.232709	0.0186373	-0.11663	-0.181156	0.18189
355.4	1.61915	1.04706	0.600831	0.332879	0.0371088		355.4	0.232735	0.01884	-0.116992	-0.181197	0.182178
355.6	1.61937	1.0468	0.600492	0.332131	0.0365764		355.6	0.232686	0.0189112	-0.117506	-0.18137	0.182306
355.8	1.6197	1.04747	0.600459	0.332379	0.0365323		355.8	0.232719	0.0187816	-0.117746	-0.181498	0.182426
356	1.61966	1.04785	0.600017	0.332352	0.0359845		356	0.2325	0.018704	-0.117739	-0.181926	0.181862
356.2	1.61965	1.0478	0.599657	0.331756	0.0352566		356.2	0.232638	0.0186005	-0.118079	-0.182106	0.182152
356.4	1.61937	1.04766	0.599084	0.331543	0.0348366		356.4	0.23234	0.0182655	-0.118562	-0.182482	0.181927
356.6	1.61911	1.04773	0.599175	0.331669	0.0351291		356.6	0.232026	0.0178446	-0.119184	-0.182764	0.181517
356.8	1.61972	1.04779	0.599014	0.33154	0.0350326		356.8	0.231975	0.0176029	-0.119043	-0.183074	0.18175
357	1.62042	1.04818	0.599358	0.331825	0.0353523		357	0.231486	0.0170452	-0.118879	-0.183296	0.181578
357.2	1.62145	1.04869	0.599628	0.332134	0.0359271		357.2	0.231474	0.0171659	-0.11891	-0.183105	0.181779
357.4	1.62189	1.04861	0.599294	0.331991	0.0358066		357.4	0.231208	0.0168446	-0.118944	-0.183225	0.182487
357.6	1.62252	1.04844	0.599501	0.332496	0.0357507		357.6	0.231573	0.0171179	-0.11856	-0.183184	0.182785
357.8	1.6234	1.04915	0.600167	0.332867	0.0363148		357.8	0.231762	0.0174903	-0.118367	-0.182592	0.182922
358	1.6237	1.04945	0.600438	0.333144	0.0365888		358	0.231859	0.0172448	-0.118188	-0.182719	0.182952
358.2	1.62483	1.05026	0.60103	0.333397	0.0369518		358.2	0.232123	0.0173176	-0.117914	-0.182386	0.182954
358.4	1.62557	1.05079	0.601818	0.33402	0.0376536		358.4	0.232272	0.016894	-0.117739	-0.182794	0.182918
358.6	1.62628	1.05106	0.602501	0.334252	0.0378928		358.6	0.232656	0.0170283	-0.117269	-0.182314	0.183051
358.8	1.62711	1.05153	0.603394	0.334668	0.0381756		358.8	0.23306	0.0170652	-0.117284	-0.182391	0.183101
359	1.62722	1.0516	0.603706	0.334595	0.0378886		359	0.233507	0.0170822	-0.117126	-0.182443	0.183418
359.2	1.62788	1.052	0.604249	0.334423	0.0380391		359.2	0.233162	0.0166909	-0.117302	-0.182615	0.183299
359.4	1.62871	1.05237	0.605015	0.335022	0.0378192		359.4	0.233446	0.0168823	-0.117163	-0.18284	0.18346
359.6	1.62899	1.0523	0.605234	0.335	0.037417		359.6	0.233462	0.0162856	-0.117381	-0.183276	0.182976
359.8	1.62935	1.05291	0.605662	0.335216	0.0374802		359.8	0.233613	0.0158328	-0.117483	-0.183679	0.182958
360.01	1.62935	1.05291	0.605662	0.335216	0.0374802		360.01	0.233613	0.0158328	-0.117483	-0.183679	0.182958
360.21	1.62073	1.04725	0.60103	0.331279	0.0350698		360.21	0.231485	0.0145474	-0.11819	-0.185301	0.179499
360.41	1.61093	1.04078	0.595906	0.327468	0.0329576		360.41	0.229002	0.0129304	-0.118649	-0.186914	0.175523
360.61	1.59965	1.03324	0.589907	0.323118	0.0302368		360.61	0.226912	0.0117372	-0.119083	-0.188265	0.171738
360.81	1.58764	1.02542	0.583889	0.318571	0.0273936		360.81	0.224148	0.0101525	-0.11979	-0.189825	0.167763
361.01	1.57479	1.01692	0.577434	0.313781	0.0246368		361.01	0.221461	0.00856293	-0.120641	-0.191052	0.163924
361.21	1.56156	1.00847	0.571188	0.309079	0.0221017		361.21	0.218492	0.00654108	-0.121535	-0.192704	0.159989
361.41	1.54822	1.00017	0.564976	0.30454	0.0195242		361.41	0.2159	0.00458031	-0.122872	-0.194052	0.156528
361.61	1.53588	0.992251	0.559275	0.299982	0.0175032		361.61	0.212903	0.00253004	-0.124112	-0.195455	0.15292
361.81	1.52395	0.984316	0.553588	0.295389	0.0153955		361.81	0.210435	0.00067464	-0.12529	-0.196603	0.150066
362.01	1.51381	0.977729	0.549547	0.292098	0.0141229		362.01	0.207733	-0.00081228	-0.126666	-0.197471	0.147855
362.21	1.50561	0.972598	0.546254	0.289496	0.0132394		362.21	0.205666	-0.00201788	-0.127793	-0.197815	0.146222
362.41	1.49763	0.967527	0.542598	0.286669	0.0114323		362.41	0.204275	-0.00348017	-0.128808	-0.198493	0.144546
362.61	1.49116	0.964041	0.539346	0.284382	0.0104817		362.61	0.202312	-0.00461345	-0.1299	-0.19913	0.142747
362.81	1.48494	0.960957	0.536994	0.282264	0.00952074		362.81	0.200673	-0.00541888	-0.130392	-0.19916	0.141145
363.01	1.4796	0.957812	0.53458	0.280343	0.00879003		363.01	0.1993	-0.00660815	-0.130945	-0.199457	0.139462
363.21	1.4742	0.954642	0.531867	0.278543	0.0076598		363.21	0.19731	-0.00831916	-0.13187	-0.200388	0.137763
363.41	1.46923	0.951691	0.529078	0.276712	0.00602545		363.41	0.196063	-0.00985015	-0.132542	-0.200928	0.136232
363.61	1.46459	0.948698	0.526742	0.275118	0.00461757		363.61	0.194803	-0.0107827	-0.132956	-0.201209	0.134924
363.81	1.46025	0.946393	0.524662	0.274145	0.00387868		363.81	0.193053	-0.0125952	-0.133901	-0.202167	0.132672
364.01	1.45618	0.944012	0.522598	0.27221	0.00302099		364.01	0.192064	-0.0133162	-0.134177	-0.202728	0.131167
364.21	1.45234	0.941856	0.520757	0.271169	0.0019566		364.21	0.190445	-0.0140252	-0.134357	-0.203212	0.129815
364.41	1.44865	0.939672	0.519065	0.27048	0.00135933		364.41	0.189409	-0.0146959	-0.133964	-0.203759	0.128624
364.61	1.44454	0.937106	0.517036	0.269311	-9.534e-05		364.61	0.188406	-0.014677	-0.134208	-0.203911	0.127791
364.81	1.44133	0.935559	0.51612	0.268723	-0.0005438		364.81	0.186613	-0.0153064	-0.134475	-0.204208	0.126891
365.01	1.43821	0.934221	0.51492	0.267939	-0.00096188		365.01	0.185766	-0.015987	-0.13484	-0.204425	0.12592
365.21	1.43535	0.932745	0.513973	0.267282	-0.00147172		365.21	0.184404	-0.0170413	-0.135452	-0.205354	0.124909
365.41	1.43262	0.931268	0.512788	0.266399	-0.00183053		365.41	0.183426	-0.0178494	-0.135978	-0.205704	0.124199
365.61	1.43102	0.930167	0.511968	0.265769	-0.00138624		365.61	0.181922	-0.0186408	-0.136389	-0.206112	0.123177
365.81	1.42889	0.928565	0.510877	0.264925	-0.00155739		365.81	0.180605	-0.0194225	-0.136927	-0.206563	0.122439
366.01	1.42726	0.927382	0.510255	0.264566	-0.00194587		366.01	0.179204	-0.0199953	-0.137812	-0.207053	0.12159
366.21	1.4259	0.926316	0.509413	0.264188	-0.00208062		366.21	0.17839	-0.0205861	-0.138652	-0.207197	0.120878
366.41	1.42337	0.924953	0.507852	0.26318	-0.00274607		366.41	0.177495	-0.0212811	-0.139538	-0.207465	0.120305
366.61	1.42131	0.923497	0.506544	0.262534	-0.00308709		366.61	0.176387	-0.021886	-0.139754	-0.207149	0.119727
366.81	1.41908	0.92193	0.506005	0.261594	-0.00331744		366.81	0.175304	-0.0226515	-0.140006	-0.207543	0.119281
367.01	1.41668	0.920112	0.504119	0.260648	-0.00458323		367.01	0.174508	-0.0230612	-0.140562	-0.208141	0.118485
367.21	1.414	0.918451	0.502613	0.25879	-0.00591351		367.21	0.173618	-0.0236416	-0.140876	-0.20832	0.117648
367.41	1.41213	0.917297	0.501626	0.257784	-0.00629864		367.41	0.173376	-0.0240514	-0.140734	-0.208425	0.117318
367.61	1.40964	0.915963	0.500624	0.256681	-0.0068566		367.61	0.172403	-0.0249143	-0.141516	-0.208874	0.116259
367.81	1.40758	0.914837	0.499278	0.255607	-0.00737223		367.81	0.171418	-0.0255695	-0.142091	-0.209458	0.114829
368.01	1.4057	0.913155	0.498387	0.254567	-0.00803814		368.01	0.17063	-0.025836	-0.142166	-0.209913	0.114428
368.21	1.40423	0.912359	0.49767	0.254255	-0.00854572		368.21	0.169286	-0.02632	-0.142462	-0.210454	0.113648
368.41	1.40187	0.911217	0.49657	0.253413	-0.0090623		368.41	0.168676	-0.0264905	-0.142589	-0.211035	0.113384
368.61	1.3998	0.910118	0.495384	0.252669	-0.0098678		368.61	0.167779	-0.0265514	-0.143202	-0.211031	0.113085
368.81	1.39863	0.909928	0.494975	0.252409	-0.0100369		368.81	0.166696	-0.0272624	-0.143698	-0.21128	0.112392
369.01	1.39737	0.909286	0.494193	0.251792	-0.010788		369.01	0.166311	-0.0278688	-0.143904	-0.21145	0.111957
369.21	1.39582	0.908347	0.493287	0.25132	-0.0113208		369.21	0.165733	-0.0282709	-0.14408	-0.211516	0.111379
369.41	1.39494	0.907879	0.492611	0.251067	-0.0110332		369.41	0.164619	-0.0288861	-0.144618	-0.211771	0.110767
369.61	1.39398	0.907508	0.492161	0.251069	-0.0108482		369.61	0.163453	-0.0293557	-0.145217	-0.21228	0.110078
369.81	1.39289	0.906141	0.491336	0.250581	-0.0114016		369.81	0.162263	-0.030009	-0.145714	-0.212895	0.109497
370.01	1.39167	0.905267	0.490563	0.250074	-0.0120452		370.01	0.161578	-0.0304429	-0.146253	-0.212908	0.109078
370.21	1.39027	0.904475	0.490312	0.249955	-0.0118605		370.21	0.160331	-0.0309608	-0.146599	-0.213376	0.108269
370.41	1.38887	0.903481	0.489453	0.248843	-0.0126659		370.41	0.159224	-0.0316991	-0.146641	-0.213672	0.107324
370.61	1.38778	0.902187	0.488733	0.248278	-0.0131216		370.61	0.159294	-0.0317273	-0.14629	-0.213073	0.107194
370.81	1.38656	0.901474	0.488505	0.248221	-0.0131069		370.81	0.158627	-0.0317293	-0.146322	-0.213473	0.106792
371.01	1.38505	0.900724	0.487775	0.247824	-0.0138849		371.01	0.158158	-0.0318435	-0.146595	-0.213831	0.10598
371.21	1.38441	0.900252	0.487618	0.24705	-0.0138239		371.21	0.15804	-0.0319389	-0.146476	-0.213844	0.105596
371.41	1.38377	0.900131	0.487672	0.246922	-0.0136099		371.41	0.157908	-0.0325667	-0.146845	-0.214322	0.10528
371.61	1.38245	0.899726	0.487093	0.246234	-0.0140791		371.61	0.157463	-0.0328758	-0.147425	-0.214374	0.104846
371.81	1.38146	0.899322	0.486647	0.245941	-0.0142825		371.81	0.156941	-0.0329312	-0.147255	-0.214145	0.104679
372.01	1.38084	0.898666	0.4868	0.246338	-0.0141772		372.01	0.156336	-0.0337432	-0.147384	-0.214269	0.104607
372.21	1.37935	0.89825	0.486353	0.245824	-0.0144957		372.21	0.155882	-0.0344079	-0.147365	-0.214264	0.104584
372.41	1.37786	0.897826	0.48584	0.245234	-0.0144708		372.41	0.155941	-0.0348536	-0.147354	-0.21407	0.104634
372.61	1.37626	0.897004	0.484648	0.244154	-0.0157542		372.61	0.155954	-0.0351046	-0.14725	-0.213503	0.104293
372.81	1.37512	0.896743	0.484098	0.243719	-0.0159632		372.81	0.15511	-0.0357521	-0.147373	-0.213766	0.103451
373.01	1.37325	0.895365	0.483026	0.242591	-0.0170703		373.01	0.154998	-0.0359634	-0.147208	-0.213785	0.103337
373.21	1.37111	0.894311	0.481906	0.241838	-0.0174558		373.21	0.154242	-0.0368433	-0.148059	-0.21456	0.102191
373.41	1.37009	0.893115	0.48121	0.240955	-0.0176237		373.41	0.153276	-0.0374063	-0.148592	-0.215393	0.101726
373.61	1.36868	0.89252	0.480555	0.240621	-0.0176337		373.61	0.152514	-0.0378062	-0.148779	-0.21614	0.101213
373.81	1.36764	0.891457	0.479658	0.239929	-0.018303		373.81	0.151186	-0.0385762	-0.14937	-0.216272	0.100346
374.01	1.36557	0.890456	0.478672	0.238851	-0.0193765		374.01	0.150448	-0.0394116	-0.14989	-0.216784	0.0995857
374.21	1.36458	0.889561	0.478348	0.2384	-0.0198058		374.21	0.149427	-0.0403292	-0.150533	-0.217408	0.0980432
374.41	1.36391	0.888444	0.477684	0.237879	-0.0204844		374.41	0.149019	-0.0407508	-0.150526	-0.217052	0.0973456
374.61	1.36326	0.887682	0.477424	0.238389	-0.0204741		374.61	0.148985	-0.0407878	-0.150876	-0.216987	0.0972052
374.81	1.36262	0.8874	0.47752	0.238964	-0.020409		374.81	0.148083	-0.0409325	-0.151401	-0.217506	0.0968234
375.01	1.36187	0.88677	0.477326	0.238796	-0.020646		375.01	0.147508	-0.0411096	-0.152135	-0.217892	0.0962449
375.21	1.36177	0.886748	0.477443	0.239148	-0.0206052		375.21	0.147457	-0.040866	-0.152178	-0.217934	0.0963589
375.41	1.36107	0.886594	0.477053	0.239157	-0.0210081		375.41	0.147035	-0.0413202	-0.152499	-0.218127	0.0961187
375.61	1.36106	0.886547	0.476968	0.239185	-0.0208099		375.61	0.146938	-0.0408878	-0.152294	-0.21779	0.0962233
375.81	1.36094	0.886558	0.477636	0.239614	-0.0202644		375.81	0.14608	-0.0409253	-0.152288	-0.217581	0.0963884
376.01	1.35983	0.885545	0.477355	0.23924	-0.0205109		376.01	0.145508	-0.0412542	-0.152653	-0.217583	0.0959844
376.21	1.35848	0.885179	0.476982	0.238185	-0.0211453		376.21	0.145263	-0.0412636	-0.152504	-0.217301	0.0961295
376.41	1.35778	0.884648	0.476422	0.237672	-0.021486		376.41	0.145294	-0.0409741	-0.152131	-0.216952	0.0960031
376.61	1.35643	0.883141	0.474884	0.236632	-0.0224991		376.61	0.144854	-0.0408822	-0.151536	-0.216385	0.0958664
376.81	1.35561	0.882233	0.47416	0.236181	-0.0224348		376.81	0.14363	-0.0412129	-0.152263	-0.217236	0.0951258
377.01	1.35421	0.880949	0.473634	0.235463	-0.0229437		377.01	0.142754	-0.0416328	-0.153038	-0.217717	0.0946456
377.21	1.35296	0.880063	0.473038	0.234854	-0.0228494		377.21	0.141819	-0.0425019	-0.15389	-0.218424	0.0936246
377.41	1.35271	0.87991	0.472713	0.234434	-0.0227081		377.41	0.141442	-0.0419713	-0.153607	-0.21815	0.0936446
377.61	1.3515	0.879316	0.47199	0.233791	-0.0229877		377.61	0.140276	-0.0428975	-0.154485	-0.218613	0.0926946
377.81	1.351	0.878635	0.471641	0.233259	-0.0237477		377.81	0.139443	-0.0437162	-0.154946	-0.218494	0.0915265
378.01	1.34992	0.877993	0.471244	0.232686	-0.0242361		378.01	0.139035	-0.0450401	-0.155507	-0.219089	0.0906194
378.21	1.34957	0.877692	0.471004	0.232671	-0.0242003		378.21	0.138095	-0.0458709	-0.155691	-0.219111	0.0895459
378.41	1.34838	0.876855	0.470204	0.232486	-0.0246225		378.41	0.137294	-0.0464209	-0.15614	-0.219398	0.0888057
378.61	1.34776	0.876917	0.470117	0.232877	-0.0249852		378.61	0.136827	-0.0468476	-0.156802	-0.220037	0.0883233
378.81	1.34758	0.87734	0.470202	0.232837	-0.0246656		378.81	0.136078	-0.0472306	-0.157052	-0.220491	0.0877036
379.01	1.34687	0.876759	0.46995	0.232553	-0.0251317		379.01	0.135698	-0.0479267	-0.156808	-0.220668	0.0871376
379.21	1.34616	0.876688	0.469617	0.232654	-0.0255774		379.21	0.135584	-0.0482931	-0.156794	-0.220943	0.0870991
379.41	1.34563	0.876204	0.469129	0.232335	-0.0260402		379.41	0.135723	-0.0481593	-0.156489	-0.220492	0.0873188
379.61	1.34528	0.876207	0.469468	0.232348	-0.0256027		379.61	0.135253	-0.048176	-0.156351	-0.220753	0.0872327
379.81	1.34458	0.876152	0.470111	0.233063	-0.0253529		379.81	0.134579	-0.0486367	-0.156348	-0.221176	0.087284
380.01	1.34343	0.875188	0.469662	0.232788	-0.0259694		380.01	0.133936	-0.0492611	-0.156456	-0.221714	0.0868396
380.21	1.34326	0.875439	0.470054	0.233177	-0.0257271		380.21	0.133469	-0.0497798	-0.156204	-0.222044	0.0867229
380.41	1.3425	0.874267	0.469657	0.233347	-0.0256103		380.41	0.133265	-0.0496089	-0.155932	-0.222315	0.0865192
380.61	1.34255	0.873825	0.469377	0.233052	-0.0253517		380.61	0.133147	-0.0498776	-0.155969	-0.222403	0.0865456
380.81	1.34234	0.873925	0.469512	0.232766	-0.0247007		380.81	0.131988	-0.0502868	-0.157303	-0.223432	0.0855546
381.01	1.34199	0.873728	0.469578	0.23248	-0.0244711		381.01	0.131752	-0.0508471	-0.158153	-0.223886	0.0850395
381.21	1.34153	0.873549	0.469352	0.232266	-0.0243399		381.21	0.131423	-0.0509559	-0.15852	-0.22393	0.084795
381.41	1.3419	0.873525	0.469517	0.232554	-0.0239889		381.41	0.131349	-0.0509938	-0.158421	-0.224216	0.0848032
381.61	1.34179	0.87317	0.469635	0.231945	-0.0241713		381.61	0.131056	-0.0519212	-0.158883	-0.224987	0.0842903
381.81	1.34222	0.87351	0.469812	0.232297	-0.0235325		381.81	0.130759	-0.0521042	-0.158763	-0.225117	0.083572
382.01	1.34112	0.873147	0.469203	0.231743	-0.0237663		382.01	0.130282	-0.0527809	-0.159086	-0.225566	0.0830749
382.21	1.34043	0.87218	0.468224	0.231366	-0.0241677		382.21	0.130042	-0.052855	-0.159005	-0.226076	0.0828516
382.41	1.3395	0.871508	0.467186	0.230909	-0.0247305		382.41	0.129716	-0.0529129	-0.159792	-0.226502	0.0825956
382.61	1.3383	0.871425	0.466728	0.230271	-0.0251919		382.61	0.129363	-0.0526195	-0.159996	-0.226472	0.0824869
382.81	1.33761	0.871332	0.466418	0.229682	-0.025202		382.81	0.129276	-0.0530125	-0.159763	-0.22608	0.0826518
383.01	1.33574	0.870278	0.465394	0.229199	-0.0262051		383.01	0.129052	-0.0533177	-0.159509	-0.225648	0.0830069
383.21	1.3347	0.869967	0.464619	0.229117	-0.0263811		383.21	0.128719	-0.0535682	-0.159915	-0.225506	0.0831266
383.41	1.33356	0.86957	0.464536	0.229196	-0.0265943		383.41	0.128633	-0.0536953	-0.159856	-0.225198	0.0836547
383.61	1.33216	0.868997	0.463721	0.228634	-0.0271847		383.61	0.127727	-0.0545141	-0.160474	-0.225684	0.0832476
383.81	1.33083	0.868806	0.463296	0.228843	-0.0277244		383.81	0.127515	-0.05454	-0.16073	-0.225825	0.0830899
384.01	1.32961	0.867986	0.462542	0.228306	-0.0284416		384.01	0.126861	-0.0546128	-0.161209	-0.225969	0.0829598
384.21	1.32861	0.867667	0.462127	0.228567	-0.0284415		384.21	0.126842	-0.0542994	-0.160747	-0.225532	0.0829072
384.41	1.32809	0.866763	0.46153	0.227988	-0.0291232		384.41	0.126606	-0.0544687	-0.161149	-0.225735	0.082084
384.61	1.32818	0.866969	0.461184	0.227606	-0.029428		384.61	0.126147	-0.0547475	-0.161562	-0.225949	0.0817126
384.81	1.32735	0.866546	0.460519	0.226936	-0.0296338		384.81	0.125173	-0.0555802	-0.162804	-0.226438	0.0806394
385.01	1.32725	0.866603	0.460331	0.227191	-0.0299854		385.01	0.125015	-0.0558102	-0.163166	-0.226577	0.0805519
385.21	1.32717	0.866302	0.460764	0.227742	-0.0295959		385.21	0.124251	-0.0557815	-0.163304	-0.226816	0.0803382
385.41	1.32735	0.865861	0.460821	0.22802	-0.0293975		385.41	0.124197	-0.0563238	-0.163423	-0.227552	0.0799072
385.61	1.32712	0.86546	0.46108	0.227771	-0.0290998		385.61	0.123993	-0.0561651	-0.163076	-0.227499	0.0795131
385.81	1.3267	0.864609	0.46071	0.227727	-0.0286917		385.81	0.123497	-0.0570555	-0.163283	-0.227787	0.0784163
386.01	1.32615	0.863618	0.460174	0.227144	-0.0292469		386.01	0.123462	-0.0571162	-0.163025	-0.227861	0.0784153
386.21	1.32609	0.862556	0.459887	0.226883	-0.02917		386.21	0.123162	-0.057728	-0.162718	-0.228466	0.0784195
386.41	1.3253	0.862339	0.459301	0.226163	-0.0291789		386.41	0.122319	-0.0581321	-0.163256	-0.228888	0.0780708
386.61	1.32426	0.862079	0.459294	0.225663	-0.02935		386.61	0.122137	-0.0580882	-0.162966	-0.228314	0.0776372
386.81	1.32393	0.861957	0.459344	0.225719	-0.0292189		386.81	0.121632	-0.0587628	-0.162599	-0.228491	0.0775224
387.01	1.32404	0.862103	0.459534	0.226094	-0.0288045		387.01	0.121166	-0.0589582	-0.162741	-0.22863	0.077423
387.21	1.32362	0.862539	0.459431	0.225709	-0.0288683		387.21	0.120919	-0.0590898	-0.163328	-0.228916	0.0772685
387.41	1.32302	0.862699	0.459761	0.225305	-0.0290576		387.41	0.12067	-0.0594304	-0.163625	-0.228968	0.0771162
387.61	1.32293	0.862184	0.459341	0.224469	-0.0298892		387.61	0.120158	-0.0595012	-0.163956	-0.228949	0.0765397
387.81	1.32244	0.862281	0.459423	0.224507	-0.0303956		387.81	0.119951	-0.0596668	-0.163916	-0.229155	0.0762618
388.01	1.32196	0.861415	0.459294	0.223707	-0.0312889		388.01	0.119504	-0.0596899	-0.163614	-0.228956	0.0760413
388.21	1.32143	0.861158	0.458959	0.223577	-0.0318096		388.21	0.118939	-0.0599509	-0.163532	-0.229235	0.0754966
388.41	1.32094	0.860724	0.458911	0.223035	-0.0324438		388.41	0.118764	-0.0603449	-0.164211	-0.229463	0.0748603
388.61	1.32029	0.860458	0.458403	0.222848	-0.0329141		388.61	0.118455	-0.0602564	-0.164512	-0.229667	0.0750064
388.81	1.31955	0.860321	0.457843	0.222498	-0.0329444		388.81	0.118049	-0.0609111	-0.165163	-0.230074	0.0745793
389.01	1.31886	0.859489	0.457516	0.222732	-0.0330226		389.01	0.117605	-0.060318	-0.165085	-0.229754	0.0747962
389.21	1.31863	0.858445	0.457365	0.22323	-0.0327573		389.21	0.116869	-0.0606423	-0.165602	-0.230304	0.0740017
389.41	1.31752	0.857713	0.456544	0.222896	-0.0328959		389.41	0.116723	-0.0610361	-0.165807	-0.230564	0.0735554
389.61	1.31689	0.8568	0.456416	0.222516	-0.0330862		389.61	0.11627	-0.0611689	-0.165912	-0.230831	0.0733584
389.81	1.31596	0.855929	0.455933	0.222393	-0.0335481		389.81	0.11553	-0.0620008	-0.16659	-0.231626	0.0726523
390.01	1.31547	0.855751	0.455625	0.222428	-0.0337344		390.01	0.115371	-0.0615373	-0.166361	-0.231392	0.0729409
390.21	1.31483	0.855779	0.455587	0.222698	-0.0332656		390.21	0.115331	-0.0617284	-0.16619	-0.231515	0.0728557
390.41	1.31475	0.856121	0.455343	0.223094	-0.0327883		390.41	0.11531	-0.0614795	-0.166519	-0.231341	0.0724462
390.61	1.31397	0.855842	0.455042	0.223158	-0.0332711		390.61	0.115378	-0.0612148	-0.16605	-0.230972	0.0725324
390.81	1.31377	0.856127	0.455141	0.223101	-0.0332187		390.81	0.11471	-0.0613792	-0.16631	-0.23163	0.0727214
391.01	1.3138	0.856585	0.455465	0.223147	-0.0328891		391.01	0.114591	-0.0614377	-0.166758	-0.231483	0.0726293
391.21	1.31304	0.856818	0.455139	0.222381	-0.0329398		391.21	0.114362	-0.0617752	-0.167051	-0.231729	0.0726469
391.41	1.31255	0.856552	0.454966	0.221843	-0.0330365		391.41	0.113969	-0.0622615	-0.166983	-0.231752	0.0724931
391.61	1.31253	0.85668	0.454881	0.221944	-0.0329646		391.61	0.113723	-0.0630479	-0.167452	-0.231856	0.0721385
391.81	1.31188	0.856686	0.45453	0.221924	-0.0330516		391.81	0.113789	-0.0637838	-0.167285	-0.231855	0.072248
392.01	1.31097	0.855715	0.454037	0.220855	-0.0334254		392.01	0.113724	-0.0635776	-0.167024	-0.231477	0.0724616
392.21	1.31029	0.855058	0.453651	0.220688	-0.0336025		392.21	0.113595	-0.0638924	-0.166844	-0.231436	0.0724925
392.41	1.30919	0.854214	0.452929	0.22047	-0.0340281		392.41	0.113933	-0.0637471	-0.166736	-0.231389	0.0725151
392.61	1.3086	0.853379	0.452036	0.220269	-0.0343996		392.61	0.11366	-0.063728	-0.166741	-0.231528	0.0718637
392.81	1.30841	0.853219	0.451789	0.220506	-0.0339707		392.81	0.113605	-0.0639246	-0.16673	-0.231609	0.0717531
393.01	1.30799	0.852063	0.451475	0.220796	-0.0342218		393.01	0.113345	-0.063332	-0.166693	-0.23124	0.0716464
393.21	1.30762	0.851573	0.451494	0.221046	-0.0344		393.21	0.113165	-0.0638064	-0.166896	-0.231455	0.0708624
393.41	1.30719	0.851346	0.451542	0.220693	-0.0349113		393.41	0.112883	-0.0637541	-0.167364	-0.231377	0.0704024
393.61	1.30756	0.851475	0.452155	0.221222	-0.0349303		393.61	0.112405	-0.0640718	-0.167741	-0.23153	0.0701348
393.81	1.30712	0.851794	0.452548	0.221895	-0.034652		393.81	0.111918	-0.0644083	-0.168181	-0.231851	0.0694275
394.01	1.30738	0.852218	0.452745	0.222291	-0.0341918		394.01	0.111705	-0.0644502	-0.168273	-0.231756	0.0686891
394.21	1.30739	0.852596	0.452629	0.222213	-0.0341254		394.21	0.111569	-0.0647001	-0.168494	-0.23195	0.0682423
394.41	1.30796	0.85299	0.452774	0.222508	-0.0340499		394.41	0.111176	-0.0647365	-0.168521	-0.232071	0.0680396
394.61	1.30767	0.852997	0.452917	0.222076	-0.0342213		394.61	0.110104	-0.0652119	-0.16893	-0.232808	0.0676015
394.81	1.30772	0.853695	0.453569	0.222209	-0.0332678		394.81	0.109338	-0.0653534	-0.169316	-0.23316	0.0671386
395.01	1.30717	0.853279	0.452932	0.221583	-0.0333739		395.01	0.10883	-0.0654994	-0.169557	-0.233036	0.0666703
395.21	1.30674	0.853596	0.452493	0.22114	-0.0333917		395.21	0.108419	-0.0656633	-0.16954	-0.233655	0.066365
395.41	1.30586	0.853462	0.451804	0.220707	-0.0336005		395.41	0.108188	-0.0658006	-0.169439	-0.233861	0.0661829
395.61	1.3059	0.853769	0.452098	0.221279	-0.0327397		395.61	0.107457	-0.0670497	-0.170222	-0.234413	0.065274
395.81	1.30492	0.852831	0.451362	0.220736	-0.0335466		395.81	0.107266	-0.0672621	-0.170395	-0.234786	0.0652347
396.01	1.30399	0.851547	0.450874	0.21991	-0.0341261		396.01	0.106588	-0.0672407	-0.170361	-0.234859	0.0650264
396.21	1.30326	0.850914	0.450468	0.219756	-0.0346124		396.21	0.106218	-0.0679444	-0.170479	-0.235325	0.0644927
396.41	1.30252	0.850552	0.450047	0.219486	-0.0349514		396.41	0.106488	-0.0674925	-0.170258	-0.235399	0.0646717
396.61	1.30213	0.849846	0.45009	0.219224	-0.0351544		396.61	0.106335	-0.0678683	-0.170394	-0.235241	0.0643833
396.81	1.30168	0.849522	0.450416	0.219209	-0.0353479		396.81	0.106414	-0.0681594	-0.170305	-0.235432	0.0646141
397.01	1.30114	0.848797	0.450451	0.218917	-0.0358996		397.01	0.106777	-0.0677805	-0.169709	-0.234684	0.0647704
397.21	1.30031	0.848296	0.450469	0.218584	-0.0360977		397.21	0.106911	-0.0680394	-0.169342	-0.234101	0.0648148
397.41	1.30024	0.848694	0.450491	0.219059	-0.0362401		397.41	0.106332	-0.0681799	-0.16948	-0.233742	0.064856
397.61	1.30019	0.849627	0.450719	0.219699	-0.0356256		397.61	0.106122	-0.0688635	-0.169823	-0.233916	0.0647562
397.81	1.29971	0.849547	0.450605	0.219778	-0.0355018		397.81	0.105984	-0.0691049	-0.170064	-0.234273	0.0643125
398.01	1.29961	0.849012	0.450262	0.219487	-0.0359945		398.01	0.105503	-0.0694168	-0.170629	-0.234328	0.0639374
398.21	1.29913	0.849076	0.449731	0.219039	-0.0361133		398.21	0.105242	-0.0694972	-0.170959	-0.234379	0.064511
398.41	1.29897	0.849095	0.449863	0.219265	-0.0357177		398.41	0.104911	-0.0694315	-0.171099	-0.234483	0.0644475
398.61	1.29863	0.849022	0.449936	0.219368	-0.0353523		398.61	0.104462	-0.0696164	-0.171508	-0.234684	0.0641186
398.81	1.29812	0.848745	0.449389	0.21935	-0.0355053		398.81	0.104375	-0.0696431	-0.171365	-0.234948	0.0638292
399.01	1.29798	0.847909	0.4486	0.218838	-0.0360382		399.01	0.104078	-0.0695049	-0.171522	-0.235217	0.0637905
399.21	1.29817	0.848084	0.44863	0.218846	-0.0356428		399.21	0.103385	-0.069826	-0.172081	-0.235915	0.0631601
[truncated: 1,603 more rows]
