# Supplementary material for: Nicotinamide mononucleotide adenylyltransferase uses its NAD+ substrate-binding site to chaperone phosphorylated Tau
Source: eLife. 2020 Apr 6;9:e51859. doi: 10.7554/eLife.51859 (PMC7136026; doi:10.7554/eLife.51859)
Supplement: Figure 2—source data 1. [file elife-51859-fig2-data1.xlsx]

## Sheet: Fig.2C
Fig. 2C	Residue-specific intensity changes of pK19 signals titrated by mN3 KKRK mutant
		intensity changes
	residue	5N-pK19:mN3 KKRK = 1:2
	245	0.461738
	246	0.73759
	248	0.935721
	250	0.805703
	252	0.653237
	253	0.822204
	254	0.737525
	255	0.693751
	256	0.763826
	257	0.672908
	258	0.452208
	259	0.712493
	260	0.847072
	261	0.728081
	262	0.694574
	263	0.628654
	264	0.728171
	265	0.637229
	266	0.81694
	267	0.819132
	268	0.422967
	269	0.722049
	274	0.763203
	306	0.858822
	307	0.580226
	308	0.85029
	309	0.867863
	310	0.777871
	311	0.787246
	313	0.830572
	314	0.699964
	315	0.759763
	316	0.748991
	317	0.662497
	318	0.772592
	319	0.364566
	320	0.683484
	321	0.622431
	322	0.580868
	323	0.503628
	324	0.675123
	325	0.79254
	326	0.807037
	327	0.608061
	328	0.81124
	329	0.787231
	331	0.889325
	333	0.418197
	335	0.486774
	336	0.59719
	337	0.77923
	338	0.837016
	339	0.880494
	340	0.73773
	341	0.524818
	342	0.650812
	343	0.665123
	344	0.822204
	345	0.816601
	346	0.577428
	347	0.848167
	348	0.968582
	349	0.843084
	350	0.824067
	351	0.794503
	352	0.738179
	353	0.631916
	354	0.847072
	355	0.728081
	356	0.773473
	357	0.845478
	358	0.834884
	359	0.70906
	360	0.884252
	361	0.596376
	363	0.85242
	368	0.39166
	369	0.53717
	371	0.895085
	371	0.631916
	372	0.986701
	366
	367
	368	0.39166
	369	0.53717
	371	0.895085
	371	0.631916
	372	0.986701
