# Supplementary material for: Nicotinamide mononucleotide adenylyltransferase uses its NAD+ substrate-binding site to chaperone phosphorylated Tau
Source: eLife. 2020 Apr 6;9:e51859. doi: 10.7554/eLife.51859 (PMC7136026; doi:10.7554/eLife.51859)
Supplement: Figure 2—source data 2. [file elife-51859-fig2-data2.xlsx]

## Sheet: Fig.2D
Fig. 2D	Influence of KKRK mutations on the inhibition of mN3 against pK19 amyloid aggregation measured by the ThT fluorescence assays
	pK19 100μM				pK19+mN3				pK19+KKRK
Time (h)	# Repeat 1	# Repeat 2	# Repeat3	Average	# Repeat 1	# Repeat 2	# Repeat3	Average	# Repeat 1	# Repeat 2	# Repeat3	Average
0	3.22355	3.16911	3.26146	3.21804	3.72588	3.95186	3.70179	3.79318	3.10877	2.90397	2.78312	2.93195
6	17.7293	17.6895	18.3708	17.9299	8.861	8.91533	8.73635	8.83756	11.0011	11.0843	10.6779	10.9211
12	33.9539	33.8013	34.6849	34.1467	10.1365	9.84582	9.96207	9.98146	15.5043	16.0011	15.868	15.7911
18	47.7862	48.8055	49.6263	48.7393	12.3121	12.0851	12.0831	12.1601	17.4516	18.913	19.3981	18.5876
24	59.4427	60.2127	62.515	60.7235	14.0704	14.2548	14.0377	14.121	20.0125	21.94	22.6061	21.5195
30	70.9583	70.7729	73.2967	71.676	15.5155	15.6376	15.4964	15.5498	22.4246	24.1839	25.4584	24.0223
36	80.4715	80.8657	81.8324	81.0565	16.8523	17.0657	16.879	16.9323	24.6095	26.4692	28.0762	26.385
42	87.2808	87.2718	88.3907	87.6478	17.906	18.3366	17.7745	18.0057	26.4954	28.713	29.9854	28.3979
48	91.6764	91.6716	93.7602	92.3694	18.5748	19.3052	18.9539	18.9446	28.1963	30.7942	32.4315	30.474
