# Supplementary material for: Nicotinamide mononucleotide adenylyltransferase uses its NAD+ substrate-binding site to chaperone phosphorylated Tau
Source: eLife. 2020 Apr 6;9:e51859. doi: 10.7554/eLife.51859 (PMC7136026; doi:10.7554/eLife.51859)
Supplement: Figure 3—source data 1. [file elife-51859-fig3-data1.xlsx]

## Sheet: Fig.3A
Fig. 3A	Enzyme activities of mN3 WT and mutants
	WT	KKRK	H22A
# Repeat 1	48.0082	0.558235	0
# Repeat 2	49.1247	0.334941	0.066988
# Repeat3	49.1247	0.223294	0
Average	48.7525	0.372157	0.0223293
