# Supplementary material for: Nicotinamide mononucleotide adenylyltransferase uses its NAD+ substrate-binding site to chaperone phosphorylated Tau
Source: eLife. 2020 Apr 6;9:e51859. doi: 10.7554/eLife.51859 (PMC7136026; doi:10.7554/eLife.51859)
Supplement: Figure 3—source data 2. [file elife-51859-fig3-data2.xlsx]

## Sheet: Fig.3B
Fig. 3B	ThT fluorescence profiles of pK19 in the absence or presence of mN3 WT and H22A mutant
	pK19				pK19+mN3				pK19+H22A
Time (h)	# Repeat 1	# Repeat 2	# Repeat3	Average	# Repeat 1	# Repeat 2	# Repeat3	Average	# Repeat 1	# Repeat 2	# Repeat3	Average
0	3.22355	3.16911	3.26146	3.21804	3.72588	3.95186	3.70179	3.79318	2.92262	2.76248	3.55324	3.07945
6	17.7293	17.6895	18.3708	17.9299	8.861	8.91533	8.73635	8.83756	6.54557	6.32858	6.69431	6.52282
12	33.9539	33.8013	34.6849	34.1467	10.1365	9.84582	9.96207	9.98146	8.53207	8.16825	8.76591	8.48874
18	47.7862	48.8055	49.6263	48.7393	12.3121	12.0851	12.0831	12.1601	10.2555	9.68558	10.2673	10.0695
24	59.4427	60.2127	62.515	60.7235	14.0704	14.2548	14.0377	14.121	11.5187	11.047	11.9472	11.5043
30	70.9583	70.7729	73.2967	71.676	15.5155	15.6376	15.4964	15.5498	12.5659	12.0482	12.8744	12.4962
36	80.4715	80.8657	81.8324	81.0565	16.8523	17.0657	16.879	16.9323	13.6468	13.004	13.8362	13.4957
42	87.2808	87.2718	88.3907	87.6478	17.906	18.3366	17.7745	18.0057	14.4083	13.8502	14.8541	14.3709
48	91.6764	91.6716	93.7602	92.3694	18.5748	19.3052	18.9539	18.9446	15.3271	14.6617	15.4257	15.1382
