# Supplementary material for: Nicotinamide mononucleotide adenylyltransferase uses its NAD+ substrate-binding site to chaperone phosphorylated Tau
Source: eLife. 2020 Apr 6;9:e51859. doi: 10.7554/eLife.51859 (PMC7136026; doi:10.7554/eLife.51859)
Supplement: Figure 3—source data 3. [file elife-51859-fig3-data3.xlsx]

## Sheet: Fig.3C
Fig. 3C	NMN weakens the binding of pK19 to mN3
Tme (s)	pK19:NMN 1:0	pK19:NMN 1:1	pK19:NMN 1:5	pK19:NMN 1:25
0.02	0.016092	0.039332	0.048517	0.039726
0.22	0.018509	0.043351	0.051279	0.045691
0.42	0.021521	0.047799	0.05468	0.051207
0.62	0.024496	0.052282	0.058428	0.057032
0.82	0.027608	0.056696	0.062363	0.061082
1.02	0.030829	0.061148	0.066266	0.067534
1.22	0.034104	0.065566	0.070091	0.073248
1.42	0.037376	0.069772	0.073694	0.078221
1.62	0.040178	0.073443	0.076877	0.082599
1.82	0.043018	0.076663	0.079729	0.085834
2.02	0.045185	0.079096	0.08199	0.087466
2.22	0.046643	0.080259	0.08345	0.084776
2.42	0.04848	0.081931	0.084759	0.086148
2.62	0.049893	0.083771	0.086244	0.087378
2.82	0.050951	0.085553	0.087656	0.088573
3.02	0.052121	0.087433	0.089435	0.089261
3.22	0.053242	0.08875	0.09079	0.09298
3.42	0.054113	0.090552	0.092212	0.094751
3.62	0.055213	0.091992	0.093298	0.095988
3.82	0.056362	0.093349	0.094709	0.096654
4.02	0.057469	0.094813	0.095382	0.096837
4.22	0.05856	0.096091	0.096334	0.096541
4.42	0.059881	0.097608	0.097791	0.095996
4.62	0.060821	0.098552	0.099069	0.095529
4.82	0.061877	0.099657	0.10008	0.094701
5.02	0.06322	0.101287	0.100872	0.096267
5.22	0.064652	0.102782	0.10164	0.094505
5.42	0.066337	0.10412	0.102479	0.094916
5.62	0.067851	0.105595	0.10344	0.09551
5.82	0.069637	0.106946	0.104364	0.096121
6.02	0.071304	0.108236	0.104852	0.09641
6.22	0.072851	0.109777	0.105966	0.096244
6.42	0.074457	0.111469	0.106887	0.10029
6.62	0.075679	0.112838	0.107809	0.101859
6.82	0.076755	0.113923	0.10892	0.10312
7.02	0.078207	0.115056	0.109674	0.103656
7.22	0.079316	0.115654	0.110865	0.104389
7.42	0.080193	0.116364	0.112164	0.105171
7.62	0.0813	0.116818	0.113242	0.105426
7.82	0.082547	0.117641	0.114333	0.105701
8.02	0.083544	0.118189	0.11515	0.105924
8.22	0.084284	0.118578	0.116348	0.105781
8.42	0.08518	0.119374	0.117553	0.105726
8.62	0.085793	0.119808	0.118482	0.105273
8.82	0.086606	0.120642	0.1191	0.104809
9.02	0.087246	0.121393	0.119563	0.10403
9.22	0.088118	0.121964	0.120183	0.103828
9.42	0.089281	0.122743	0.121157	0.105566
9.62	0.090336	0.12372	0.121571	0.106639
9.82	0.091462	0.124716	0.122295	0.107854
10.02	0.092792	0.125958	0.122892	0.108585
10.22	0.093662	0.127523	0.124024	0.109466
10.42	0.094687	0.129153	0.124478	0.110385
10.62	0.095697	0.130018	0.124882	0.110897
10.82	0.096943	0.131311	0.125871	0.111249
11.02	0.098306	0.132248	0.126687	0.111334
11.22	0.099319	0.133	0.128068	0.112059
11.42	0.100047	0.13403	0.12875	0.112473
11.62	0.101031	0.134949	0.129521	0.113038
11.82	0.101907	0.136056	0.130134	0.113588
12.02	0.103278	0.13681	0.130752	0.113911
12.22	0.103864	0.137641	0.131559	0.114217
12.42	0.105005	0.138296	0.131942	0.114677
12.62	0.105767	0.138818	0.132629	0.115142
12.82	0.106874	0.139226	0.132838	0.115532
13.02	0.107296	0.139855	0.133515	0.115651
13.22	0.108336	0.140618	0.134261	0.1161
13.42	0.109276	0.141113	0.135033	0.116111
13.62	0.109926	0.14201	0.13521	0.116638
13.82	0.110628	0.143025	0.136253	0.117143
14.02	0.111192	0.143823	0.136767	0.117767
14.22	0.111661	0.144871	0.137279	0.118422
14.42	0.112757	0.145779	0.137798	0.118608
14.62	0.113937	0.146099	0.138336	0.118638
14.82	0.115044	0.146799	0.139407	0.11924
15.02	0.115909	0.147333	0.140259	0.119745
15.22	0.116809	0.148544	0.140907	0.120228
15.42	0.117266	0.149308	0.141312	0.120635
15.62	0.117849	0.150082	0.141688	0.121335
15.82	0.118747	0.150753	0.142121	0.121811
16.02	0.120009	0.151356	0.143093	0.12251
16.22	0.120626	0.151983	0.143647	0.122928
16.42	0.121846	0.152605	0.144224	0.123313
16.62	0.122843	0.153253	0.144807	0.12364
16.82	0.123698	0.153517	0.144945	0.124005
17.02	0.12414	0.154619	0.145836	0.123916
17.22	0.12482	0.155169	0.146118	0.12416
17.42	0.125597	0.155774	0.146612	0.124418
17.62	0.126328	0.156444	0.146921	0.125114
17.82	0.127059	0.156761	0.147686	0.125824
18.02	0.127715	0.157277	0.147748	0.126543
18.22	0.128564	0.157831	0.147987	0.126891
18.42	0.129562	0.158104	0.148765	0.127061
18.62	0.130371	0.158716	0.149364	0.127453
18.82	0.130852	0.159265	0.150038	0.128242
19.02	0.131602	0.159737	0.150623	0.128622
19.22	0.132179	0.160684	0.151312	0.12894
19.42	0.132513	0.161266	0.152341	0.129608
19.62	0.133109	0.161593	0.153216	0.130177
19.82	0.134125	0.162227	0.154219	0.130732
20.02	0.134812	0.163178	0.155307	0.130849
20.22	0.135343	0.164067	0.155795	0.130852
20.42	0.135833	0.16475	0.15648	0.130798
20.62	0.136769	0.16527	0.156875	0.131018
20.82	0.137062	0.165689	0.157487	0.130729
21.02	0.13797	0.166759	0.15815	0.130936
21.22	0.13863	0.167047	0.158328	0.13122
21.42	0.139751	0.167686	0.158964	0.131826
21.62	0.140453	0.168255	0.159274	0.132548
21.82	0.14111	0.169098	0.159432	0.132785
22.02	0.141782	0.169727	0.159541	0.132968
22.22	0.142396	0.170189	0.160162	0.132751
22.42	0.142961	0.170592	0.160655	0.132926
22.62	0.144158	0.171504	0.160904	0.133286
22.82	0.144777	0.171802	0.16157	0.133665
23.02	0.145634	0.172125	0.16193	0.13388
23.22	0.14656	0.173023	0.162502	0.134307
23.42	0.147164	0.173824	0.163165	0.134469
23.62	0.14756	0.17461	0.163361	0.134889
23.82	0.148231	0.175697	0.163699	0.135431
24.02	0.148938	0.176756	0.164246	0.13579
24.22	0.149309	0.177519	0.164872	0.135862
24.42	0.150158	0.178264	0.165285	0.135965
24.62	0.150902	0.178916	0.165553	0.136132
24.82	0.151246	0.179399	0.165962	0.136082
25.02	0.15212	0.180108	0.165959	0.1366
25.22	0.152642	0.1804	0.166499	0.136773
25.42	0.153438	0.181066	0.167181	0.137304
25.62	0.153858	0.181654	0.167434	0.137438
25.82	0.154391	0.182115	0.167868	0.137419
26.02	0.15478	0.182165	0.168196	0.137541
26.22	0.155317	0.182468	0.168557	0.137628
26.42	0.156035	0.182905	0.168739	0.13793
26.62	0.156942	0.183178	0.169132	0.138232
26.82	0.157247	0.183281	0.169428	0.138196
27.02	0.15785	0.183952	0.169258	0.138454
27.22	0.158689	0.184658	0.169425	0.138873
27.42	0.158818	0.185436	0.169746	0.139268
27.62	0.159384	0.186114	0.170157	0.140035
27.82	0.159983	0.186337	0.170613	0.140748
28.02	0.160732	0.186909	0.171263	0.140808
28.22	0.160849	0.187318	0.171487	0.140784
28.42	0.161471	0.187672	0.171674	0.141379
28.62	0.16153	0.188026	0.172114	0.141432
28.82	0.161899	0.188251	0.172558	0.141728
29.02	0.162619	0.188742	0.172928	0.141824
29.22	0.163276	0.189117	0.173704	0.142221
29.42	0.163939	0.189856	0.174003	0.142623
29.62	0.164529	0.190566	0.174379	0.142843
29.82	0.16539	0.191006	0.174778	0.142955
30.02	0.166056	0.191211	0.174782	0.143388
30.22	0.167193	0.191626	0.175422	0.143534
30.42	0.16802	0.192276	0.175836	0.143885
30.62	0.168651	0.192637	0.176291	0.144038
30.82	0.169203	0.193339	0.176723	0.144104
31.02	0.169916	0.193721	0.177078	0.144406
31.22	0.170921	0.194263	0.177464	0.144576
31.42	0.171389	0.194782	0.178276	0.144845
31.62	0.172145	0.194871	0.178714	0.14476
31.82	0.17249	0.195215	0.179107	0.144833
32.02	0.17288	0.195957	0.179387	0.14486
32.22	0.173123	0.196264	0.179729	0.145119
32.42	0.17366	0.196905	0.180505	0.145391
32.62	0.173867	0.197303	0.181348	0.145308
32.82	0.17425	0.197726	0.181974	0.14536
33.02	0.174789	0.198338	0.182549	0.145434
33.22	0.175272	0.199007	0.183092	0.14568
33.42	0.175928	0.199801	0.18355	0.145994
33.62	0.176644	0.200095	0.184237	0.146394
33.82	0.177079	0.200476	0.184423	0.146767
34.02	0.177663	0.200781	0.18451	0.147128
34.22	0.178286	0.201207	0.185447	0.147127
34.42	0.178534	0.201527	0.185774	0.147638
34.62	0.179023	0.201731	0.185872	0.147695
34.82	0.17945	0.202209	0.18608	0.147785
35.02	0.180316	0.202482	0.186149	0.147802
35.22	0.181212	0.202864	0.186096	0.14785
35.42	0.181737	0.203097	0.1861	0.147874
35.62	0.182211	0.203274	0.185837	0.148006
35.82	0.182656	0.203878	0.186092	0.148417
36.02	0.183108	0.20461	0.185909	0.148445
36.22	0.183743	0.205046	0.186358	0.148489
36.42	0.184191	0.20583	0.186811	0.148643
36.62	0.184417	0.20609	0.187325	0.148766
36.82	0.184644	0.206826	0.187321	0.149054
37.02	0.18511	0.207628	0.187396	0.149498
37.22	0.185592	0.208301	0.187746	0.150023
37.42	0.186112	0.208947	0.188081	0.15049
37.62	0.186233	0.209287	0.188156	0.151013
37.82	0.186517	0.209761	0.188281	0.15137
38.02	0.18721	0.209835	0.188569	0.151487
38.22	0.187246	0.210068	0.189226	0.15178
38.42	0.18756	0.210289	0.189364	0.151986
38.62	0.18807	0.210716	0.189606	0.151951
38.82	0.188544	0.211286	0.190301	0.151958
39.02	0.189491	0.211149	0.190575	0.152095
39.22	0.190124	0.210816	0.190636	0.152034
39.42	0.190438	0.211096	0.190642	0.152142
39.62	0.190795	0.211106	0.191281	0.152485
39.82	0.191526	0.211447	0.191439	0.152388
40.02	0.192173	0.211907	0.191408	0.152578
40.22	0.192749	0.212186	0.191814	0.15271
40.42	0.193187	0.212352	0.192635	0.152951
40.62	0.193292	0.212658	0.192848	0.152971
40.82	0.193762	0.213286	0.192819	0.153347
41.02	0.194321	0.213376	0.193024	0.153982
41.22	0.194621	0.213168	0.193343	0.154433
41.42	0.195095	0.213554	0.193877	0.154966
41.62	0.195368	0.21385	0.193803	0.155335
41.82	0.196088	0.214159	0.193944	0.155505
42.02	0.196598	0.214536	0.194029	0.155497
42.22	0.196808	0.21511	0.194202	0.155684
42.42	0.197369	0.215679	0.194608	0.155853
42.62	0.198082	0.216628	0.194978	0.156219
42.82	0.199001	0.217233	0.195444	0.155968
43.02	0.199539	0.217533	0.195789	0.15577
43.22	0.199574	0.217979	0.196375	0.155838
43.42	0.199703	0.21871	0.196699	0.155824
43.62	0.199956	0.21916	0.197076	0.156058
43.82	0.200135	0.219892	0.19717	0.155949
44.02	0.200572	0.220453	0.197208	0.156401
44.22	0.200688	0.220742	0.197453	0.156238
44.42	0.200726	0.221138	0.198098	0.156452
44.62	0.200519	0.221586	0.197945	0.156544
44.82	0.200652	0.221692	0.198368	0.156907
45.02	0.200911	0.221395	0.198697	0.15741
45.22	0.201095	0.221535	0.198862	0.157248
45.42	0.201606	0.222088	0.199141	0.15772
45.62	0.202127	0.222433	0.199188	0.157882
45.82	0.202744	0.222708	0.199266	0.158207
46.02	0.203516	0.222907	0.199783	0.158393
46.22	0.203806	0.223276	0.200148	0.158754
46.42	0.204134	0.223973	0.200959	0.159025
46.62	0.204908	0.224607	0.201703	0.158972
46.82	0.205454	0.224937	0.202394	0.158856
47.02	0.206017	0.225517	0.202891	0.159312
47.22	0.206806	0.225935	0.203238	0.159435
47.42	0.207533	0.226444	0.203443	0.159083
47.62	0.208163	0.226726	0.20351	0.159401
47.82	0.208537	0.227101	0.203941	0.15971
48.02	0.209382	0.227289	0.203643	0.160198
48.22	0.209565	0.227602	0.203856	0.160403
48.42	0.209694	0.228115	0.203946	0.160775
48.62	0.210225	0.228439	0.203925	0.160817
48.82	0.210725	0.228634	0.204137	0.161003
49.02	0.211536	0.228953	0.20385	0.161126
49.22	0.211952	0.229346	0.203688	0.161189
49.42	0.212397	0.22961	0.20412	0.161529
49.62	0.212559	0.229776	0.204282	0.161799
49.82	0.212673	0.230133	0.2049	0.161536
50.02	0.212855	0.230565	0.205571	0.161578
50.22	0.212982	0.230939	0.205799	0.162031
50.42	0.2129	0.231363	0.206259	0.162168
50.62	0.213619	0.231572	0.206397	0.161946
50.82	0.214215	0.232145	0.206496	0.162316
51.02	0.215246	0.232605	0.206482	0.162207
51.22	0.21557	0.23262	0.206805	0.161988
51.42	0.215948	0.232872	0.207238	0.161834
51.62	0.216526	0.233263	0.207703	0.162311
51.82	0.21687	0.23353	0.207995	0.162406
52.02	0.2174	0.233745	0.208068	0.162694
52.22	0.217548	0.234109	0.208119	0.162445
52.42	0.217813	0.234579	0.208457	0.162733
52.62	0.218399	0.234991	0.208716	0.16265
52.82	0.218861	0.235111	0.209042	0.163011
53.02	0.218914	0.235162	0.209127	0.16302
53.22	0.219215	0.235086	0.209647	0.163189
53.42	0.219415	0.235278	0.210349	0.163283
53.62	0.21917	0.235523	0.210829	0.163311
53.82	0.219414	0.235737	0.211859	0.163268
54.02	0.219946	0.236014	0.211955	0.163978
54.22	0.220331	0.236112	0.21203	0.16432
54.42	0.220601	0.23646	0.212087	0.164149
54.62	0.22131	0.236648	0.211933	0.164058
54.82	0.221736	0.23704	0.212212	0.164373
55.02	0.22208	0.237122	0.212342	0.164454
55.22	0.222488	0.237223	0.212492	0.164806
55.42	0.22345	0.237702	0.212682	0.164618
55.62	0.224447	0.237781	0.212437	0.164547
55.82	0.225093	0.237934	0.212253	0.164599
56.02	0.225752	0.238397	0.212282	0.164472
56.22	0.226248	0.23906	0.212099	0.16414
56.42	0.226555	0.239541	0.212552	0.164389
56.62	0.226984	0.240064	0.212589	0.164418
56.82	0.227652	0.240139	0.212748	0.164573
57.02	0.227883	0.240724	0.212906	0.164596
57.22	0.228284	0.241611	0.213526	0.164712
57.42	0.228335	0.242256	0.213896	0.165155
57.62	0.228391	0.242501	0.214298	0.165221
57.82	0.228751	0.242845	0.21489	0.165626
58.02	0.229243	0.243371	0.215165	0.165739
58.22	0.229429	0.243646	0.215323	0.165975
58.42	0.229741	0.243844	0.215327	0.165954
58.62	0.229859	0.243892	0.215846	0.166324
58.82	0.229913	0.243897	0.21635	0.167083
59.02	0.230174	0.243635	0.216419	0.167544
59.22	0.230535	0.243404	0.216586	0.167637
59.42	0.231085	0.242957	0.216735	0.167572
59.62	0.231933	0.242857	0.216275	0.167784
59.82	0.232555	0.242949	0.216518	0.168041
60.02	0.232636	0.242858	0.216703	0.167788
60.22	0.232652	0.243085	0.216866	0.167821
60.42	0.233048	0.24326	0.216926	0.167519
60.62	0.233486	0.243933	0.217085	0.167624
60.82	0.233991	0.244124	0.216882	0.167574
61.02	0.234233	0.244911	0.216617	0.167517
61.22	0.234589	0.245404	0.216713	0.167526
61.42	0.234732	0.245599	0.216552	0.167607
61.62	0.235267	0.245796	0.216728	0.167407
61.82	0.235518	0.246667	0.216956	0.167397
62.02	0.236428	0.246872	0.217064	0.167286
62.22	0.23698	0.24713	0.217246	0.167415
62.42	0.237288	0.247526	0.217267	0.167407
62.62	0.237968	0.247857	0.21778	0.167485
62.82	0.238201	0.247688	0.21796	0.167788
63.02	0.238677	0.247972	0.218146	0.167627
63.22	0.238985	0.248026	0.218341	0.168022
63.42	0.239558	0.247929	0.218244	0.168385
63.62	0.239998	0.248514	0.218244	0.168591
63.82	0.240216	0.24865	0.218669	0.168876
64.02	0.240129	0.248825	0.218977	0.169081
64.22	0.240125	0.24903	0.219381	0.169294
64.42	0.240486	0.249638	0.219296	0.16935
64.62	0.240623	0.249829	0.219525	0.169864
64.82	0.241007	0.250382	0.219525	0.170235
65.02	0.241306	0.250946	0.219339	0.170503
65.22	0.241458	0.25117	0.219664	0.170431
65.42	0.241718	0.251597	0.220023	0.170635
65.62	0.242101	0.25195	0.220383	0.170659
65.82	0.242533	0.252552	0.220708	0.170595
66.02	0.243193	0.252347	0.221204	0.170233
66.22	0.243196	0.252331	0.22131	0.170218
66.42	0.24314	0.252673	0.221098	0.170109
66.62	0.243795	0.252735	0.221538	0.169886
66.82	0.243857	0.252833	0.221818	0.170316
67.02	0.243922	0.253112	0.222049	0.170488
67.22	0.244064	0.253062	0.222112	0.17078
67.42	0.244539	0.253298	0.222334	0.170673
67.62	0.244536	0.253712	0.222608	0.170741
67.82	0.24497	0.254099	0.222811	0.171057
68.02	0.24505	0.254403	0.223266	0.171345
68.22	0.245039	0.254563	0.22366	0.171412
68.42	0.245212	0.255064	0.223398	0.1719
68.62	0.245843	0.255406	0.223625	0.172418
68.82	0.246514	0.256413	0.223884	0.172836
69.02	0.246676	0.2566	0.223926	0.172943
69.22	0.247048	0.256712	0.224328	0.172678
69.42	0.247571	0.257234	0.224737	0.17287
69.62	0.247812	0.257419	0.224831	0.172795
69.82	0.248461	0.257801	0.225447	0.172785
70.02	0.249107	0.257686	0.225605	0.172706
70.22	0.249358	0.257863	0.225546	0.172959
70.42	0.249805	0.258159	0.225899	0.172904
70.62	0.250522	0.258293	0.225709	0.173449
70.82	0.250684	0.258361	0.226067	0.173634
71.02	0.25084	0.258396	0.226498	0.17376
71.22	0.251185	0.258653	0.226436	0.17366
71.42	0.251489	0.25901	0.226586	0.173911
71.62	0.251701	0.259255	0.226192	0.173824
71.82	0.252102	0.259613	0.226394	0.174071
72.02	0.252204	0.259752	0.226658	0.174047
72.22	0.252448	0.259709	0.2266	0.174168
72.42	0.252817	0.259933	0.226674	0.174361
72.62	0.253356	0.260629	0.227004	0.174338
72.82	0.253835	0.261001	0.227335	0.174384
73.02	0.253841	0.260903	0.227863	0.174282
73.22	0.254172	0.26082	0.228117	0.174334
73.42	0.254927	0.261255	0.228475	0.174689
73.62	0.255502	0.26153	0.228829	0.174818
73.82	0.25623	0.261781	0.229389	0.174962
74.02	0.256888	0.261906	0.229438	0.175355
74.22	0.257153	0.262311	0.229581	0.175279
74.42	0.257817	0.262738	0.229739	0.175358
74.62	0.258382	0.26311	0.229242	0.175515
74.82	0.258156	0.263624	0.230215	0.175272
75.02	0.258377	0.264269	0.23029	0.175211
75.22	0.258172	0.264706	0.230038	0.175095
75.42	0.258587	0.264847	0.230075	0.174997
75.62	0.258707	0.265181	0.230128	0.174467
75.82	0.258709	0.265288	0.230604	0.174493
76.02	0.259024	0.265788	0.230681	0.174026
76.22	0.259494	0.265683	0.23073	0.173918
76.42	0.260206	0.265933	0.231107	0.174021
76.62	0.260557	0.266062	0.23144	0.174507
76.82	0.260953	0.265703	0.231805	0.174634
77.02	0.261273	0.265445	0.231911	0.174882
77.22	0.261653	0.265523	0.23205	0.175546
77.42	0.26229	0.265697	0.232438	0.175819
77.62	0.262458	0.26566	0.232659	0.176162
77.82	0.263042	0.265563	0.232773	0.176249
78.02	0.26361	0.26579	0.232769	0.176507
78.22	0.263693	0.26606	0.23268	0.176183
78.42	0.264088	0.266574	0.232678	0.176177
78.62	0.263951	0.266799	0.232803	0.176189
78.82	0.263624	0.267104	0.233273	0.1766
79.02	0.26399	0.267643	0.23284	0.176669
79.22	0.263909	0.267799	0.232795	0.176706
79.42	0.264524	0.268055	0.233165	0.176529
79.62	0.264313	0.268638	0.233577	0.176508
79.82	0.264696	0.268802	0.23365	0.176601
80.02	0.265057	0.269273	0.233494	0.176637
80.22	0.26545	0.269068	0.233696	0.177384
80.42	0.265844	0.269384	0.234385	0.177613
80.62	0.266045	0.269308	0.23466	0.177616
80.82	0.266087	0.269216	0.23448	0.177525
81.02	0.266264	0.269532	0.234562	0.177637
81.22	0.266498	0.269795	0.234962	0.177707
81.42	0.266928	0.269895	0.235154	0.177605
81.62	0.267091	0.269728	0.23512	0.177753
81.82	0.267433	0.270045	0.235069	0.177506
82.02	0.267711	0.27047	0.2352	0.17735
82.22	0.267413	0.271051	0.235506	0.177061
82.42	0.267547	0.271057	0.235676	0.177032
82.62	0.26782	0.270902	0.235985	0.177329
82.82	0.268353	0.270946	0.235816	0.177511
83.02	0.268735	0.271171	0.235904	0.177231
83.22	0.269534	0.271388	0.236184	0.177027
83.42	0.269999	0.271951	0.236409	0.177343
83.62	0.270333	0.272327	0.236446	0.177294
83.82	0.270866	0.272629	0.236364	0.177464
84.02	0.271275	0.27298	0.23621	0.177583
84.22	0.271648	0.273508	0.236826	0.178049
84.42	0.272195	0.274049	0.237248	0.17767
84.62	0.272743	0.274325	0.236772	0.177774
84.82	0.273248	0.274469	0.236642	0.177967
85.02	0.273853	0.274869	0.236736	0.178276
85.22	0.274255	0.27508	0.236423	0.178312
85.42	0.274136	0.275262	0.23615	0.178755
85.62	0.274364	0.275211	0.236022	0.178758
85.82	0.274531	0.275724	0.235881	0.17855
86.02	0.274893	0.275872	0.235937	0.178372
86.22	0.27463	0.27581	0.235982	0.17832
86.42	0.274617	0.274958	0.236117	0.178158
86.62	0.275153	0.274903	0.235968	0.17809
86.82	0.275339	0.27498	0.235857	0.17812
87.02	0.275532	0.275096	0.236058	0.178213
87.22	0.276137	0.275703	0.236237	0.178462
87.42	0.276081	0.276133	0.236324	0.178592
87.62	0.276422	0.27641	0.237053	0.178555
87.82	0.276448	0.276749	0.237263	0.179037
88.02	0.276573	0.277333	0.237707	0.179153
88.22	0.276728	0.278077	0.238084	0.179679
88.42	0.277305	0.278247	0.238371	0.180091
88.62	0.277652	0.278515	0.238497	0.1804
88.82	0.277862	0.27868	0.23902	0.180551
89.02	0.278185	0.278902	0.239045	0.181189
89.22	0.278224	0.279212	0.239163	0.18118
89.42	0.278676	0.279493	0.239456	0.181175
89.62	0.279464	0.279353	0.239848	0.180771
89.82	0.27959	0.279632	0.240005	0.18079
90.02	0.280082	0.279546	0.240108	0.180953
90.22	0.280159	0.279674	0.240387	0.180849
90.42	0.280773	0.279538	0.240337	0.180872
90.62	0.28161	0.279972	0.240422	0.18089
90.82	0.2819	0.280462	0.240207	0.181315
91.02	0.282296	0.280993	0.239956	0.181125
91.22	0.282399	0.281178	0.24008	0.181065
91.42	0.282675	0.281355	0.240258	0.180757
91.62	0.283047	0.281654	0.240589	0.18063
91.82	0.283244	0.282041	0.240304	0.180577
92.02	0.283723	0.28266	0.240592	0.180363
92.22	0.284101	0.282734	0.240193	0.180545
92.42	0.284407	0.282898	0.240704	0.180642
92.62	0.284586	0.282994	0.240789	0.180454
92.82	0.284886	0.283004	0.240884	0.180431
93.02	0.285219	0.283124	0.241107	0.180377
93.22	0.285739	0.283309	0.241533	0.179817
93.42	0.285954	0.283259	0.241873	0.179351
93.62	0.28592	0.283029	0.242123	0.179716
93.82	0.285711	0.283443	0.242242	0.180067
94.02	0.286004	0.283403	0.242409	0.180298
94.22	0.28625	0.283266	0.242825	0.180629
94.42	0.286748	0.28303	0.242961	0.18091
94.62	0.286991	0.283299	0.243373	0.181116
94.82	0.286832	0.283165	0.24312	0.181623
95.02	0.287259	0.283111	0.243147	0.181478
95.22	0.287468	0.283102	0.243514	0.181717
95.42	0.287969	0.283298	0.243718	0.181372
95.62	0.288394	0.283413	0.243715	0.181331
95.82	0.288741	0.283812	0.243862	0.181845
96.02	0.288792	0.284019	0.24397	0.181857
96.22	0.288607	0.284253	0.243856	0.18224
96.42	0.288775	0.284767	0.244271	0.182514
96.62	0.288898	0.285079	0.244069	0.182668
96.82	0.289076	0.285789	0.244094	0.182662
97.02	0.28911	0.286251	0.244166	0.182473
97.22	0.289456	0.286755	0.244353	0.182526
97.42	0.289596	0.287213	0.244726	0.182682
97.62	0.289904	0.287736	0.244629	0.183314
97.82	0.290271	0.28837	0.24445	0.183063
98.02	0.290815	0.288375	0.244762	0.182952
98.22	0.290917	0.288732	0.244704	0.182788
98.42	0.291349	0.288788	0.244599	0.182659
98.62	0.291528	0.288808	0.244486	0.182858
98.82	0.291593	0.288568	0.243723	0.182608
99.02	0.292086	0.288717	0.243407	0.182297
99.22	0.292401	0.288667	0.243316	0.182177
99.42	0.29286	0.288613	0.243526	0.182018
99.62	0.293366	0.288706	0.24369	0.182361
99.82	0.293619	0.289044	0.244043	0.182852
100.02	0.293661	0.288989	0.244254	0.182665
100.22	0.293788	0.289275	0.245069	0.182955
100.42	0.294169	0.289422	0.245363	0.183566
100.62	0.294341	0.289761	0.245593	0.183772
100.82	0.294636	0.290211	0.245893	0.183696
101.02	0.295097	0.290179	0.246123	0.183553
101.22	0.295647	0.290549	0.246308	0.183618
101.42	0.296443	0.29081	0.246314	0.183888
101.62	0.296735	0.291008	0.245947	0.183917
101.82	0.296941	0.291241	0.245513	0.1833
102.02	0.2968	0.291223	0.24553	0.182915
102.22	0.296595	0.291638	0.245136	0.18291
102.42	0.296972	0.291489	0.244925	0.183164
102.62	0.296739	0.291412	0.245066	0.183124
102.82	0.29662	0.291653	0.244805	0.182896
103.02	0.296915	0.291959	0.245012	0.182901
103.22	0.297368	0.29239	0.245403	0.182754
103.42	0.298097	0.29279	0.24587	0.182799
103.62	0.298431	0.293079	0.245919	0.182998
103.82	0.298722	0.293519	0.24635	0.183363
104.02	0.298752	0.293311	0.246524	0.183196
104.22	0.29899	0.29334	0.247238	0.183547
104.42	0.299282	0.293428	0.247271	0.184125
104.62	0.299543	0.293747	0.247456	0.183875
104.82	0.300012	0.293498	0.247378	0.18359
105.02	0.300347	0.293602	0.247355	0.183783
105.22	0.300909	0.293793	0.247483	0.184009
105.42	0.301416	0.294023	0.247666	0.184419
105.62	0.301423	0.293915	0.247997	0.184439
105.82	0.301654	0.293977	0.247932	0.184392
106.02	0.301794	0.29412	0.248597	0.184306
106.22	0.302031	0.29422	0.249391	0.184688
106.42	0.302508	0.294372	0.249495	0.185003
106.62	0.302667	0.294051	0.249853	0.185061
106.82	0.303067	0.294677	0.249812	0.184933
107.02	0.303166	0.294894	0.24992	0.18467
107.22	0.303389	0.295152	0.25032	0.184284
107.42	0.303752	0.295274	0.250435	0.184241
107.62	0.303699	0.295806	0.250718	0.184233
107.82	0.303536	0.296185	0.250767	0.184523
108.02	0.303803	0.296065	0.250358	0.184762
108.22	0.303997	0.296171	0.249949	0.18511
108.42	0.304159	0.296536	0.249887	0.185067
108.62	0.304564	0.296533	0.249851	0.185084
108.82	0.304941	0.296582	0.249727	0.185139
109.02	0.305334	0.297169	0.24976	0.185472
109.22	0.305895	0.297455	0.249898	0.185283
109.42	0.306407	0.297828	0.250047	0.185305
109.62	0.306896	0.297821	0.250077	0.185312
109.82	0.307463	0.298022	0.250256	0.185034
110.02	0.307825	0.298085	0.250302	0.184502
110.22	0.308574	0.297665	0.250153	0.184697
110.42	0.309063	0.297641	0.249525	0.184653
110.62	0.309461	0.297412	0.24944	0.184272
110.82	0.309735	0.297749	0.2496	0.184196
111.02	0.309763	0.297813	0.249706	0.184283
111.22	0.310201	0.297742	0.249711	0.184175
111.42	0.310351	0.298037	0.249806	0.184522
111.62	0.310447	0.298147	0.250396	0.184749
111.82	0.310375	0.298187	0.250343	0.185447
112.02	0.310374	0.298379	0.250307	0.185926
112.22	0.310106	0.298102	0.250746	0.183679
112.42	0.310012	0.298167	0.251745	0.185031
112.62	0.309977	0.298242	0.251944	0.186682
112.82	0.309778	0.29842	0.251851	0.18811
113.02	0.310302	0.29882	0.251728	0.189626
113.22	0.310334	0.299171	0.252013	0.190357
113.42	0.310899	0.299474	0.252542	0.191002
113.62	0.311372	0.299666	0.252536	0.191762
113.82	0.311994	0.300006	0.252488	0.19187
114.02	0.312372	0.3	0.252162	0.191529
114.22	0.312653	0.300004	0.251944	0.191586
114.42	0.312891	0.30032	0.251978	0.191511
114.62	0.313454	0.300497	0.252162	0.191132
114.82	0.313792	0.300753	0.25233	0.190915
115.02	0.314051	0.301146	0.252277	0.190241
115.22	0.31443	0.301243	0.252294	0.189371
115.42	0.314836	0.301531	0.252702	0.188552
115.62	0.31492	0.301519	0.25298	0.187294
115.82	0.314846	0.30203	0.252964	0.186239
116.02	0.31504	0.302529	0.253323	0.184636
116.22	0.315279	0.302607	0.253455	0.183094
116.42	0.315206	0.302989	0.253508	0.185226
116.62	0.315576	0.303271	0.253337	0.185772
116.82	0.315574	0.303391	0.253349	0.185875
117.02	0.316442	0.304019	0.253465	0.18584
117.22	0.316484	0.304207	0.25414	0.185459
117.42	0.316749	0.304431	0.254671	0.185443
117.62	0.316973	0.304632	0.254561	0.185546
117.82	0.31703	0.30463	0.25478	0.185333
118.02	0.316476	0.304535	0.255148	0.185089
118.22	0.316478	0.304776	0.255166	0.185411
118.42	0.316671	0.304782	0.255439	0.185906
118.62	0.316785	0.304641	0.255529	0.186069
118.82	0.316949	0.304903	0.255347	0.186148
119.02	0.31707	0.305439	0.25497	0.186464
119.22	0.317518	0.305679	0.254939	0.186667
119.42	0.317684	0.305668	0.254632	0.18699
119.62	0.317706	0.305768	0.254511	0.187253
119.82	0.31808	0.305747	0.254524	0.187512
120.02	0.318577	0.305746	0.254409	0.187155
120.22	0.318593	0.305923	0.254128	0.187375
120.42	0.319031	0.306015	0.254457	0.187294
120.62	0.319653	0.306328	0.254878	0.187579
120.82	0.320011	0.306618	0.255147	0.187151
121.02	0.320728	0.306837	0.255557	0.187153
121.22	0.320763	0.306771	0.256411	0.187341
121.42	0.320999	0.306534	0.257065	0.187257
121.62	0.321264	0.306546	0.257259	0.187299
121.82	0.321483	0.306874	0.257963	0.187376
122.02	0.321682	0.307379	0.258081	0.187323
122.22	0.322422	0.307631	0.258361	0.187314
122.42	0.322767	0.307798	0.258455	0.187182
122.62	0.322828	0.308288	0.258338	0.187028
122.82	0.322971	0.308812	0.258063	0.18628
123.02	0.322648	0.309038	0.258002	0.187223
123.22	0.322715	0.308724	0.257841	0.187495
123.42	0.322556	0.308599	0.257713	0.187905
123.62	0.322673	0.308608	0.257741	0.188114
123.82	0.322513	0.30848	0.257292	0.188508
124.02	0.32222	0.308665	0.257327	0.188489
124.22	0.322143	0.309037	0.257257	0.188675
124.42	0.322651	0.309299	0.257505	0.188826
124.62	0.323346	0.309539	0.257651	0.189098
124.82	0.323715	0.309739	0.257742	0.189486
125.02	0.32409	0.309832	0.258026	0.1895
125.22	0.324404	0.310046	0.258195	0.189499
125.42	0.32491	0.310091	0.258342	0.1895
125.62	0.325198	0.310609	0.258285	0.189496
125.82	0.325681	0.311099	0.258999	0.189402
126.02	0.32622	0.311113	0.259563	0.189237
126.22	0.326853	0.311089	0.260222	0.188671
126.42	0.327103	0.311327	0.260033	0.188613
126.62	0.327219	0.311532	0.260066	0.188497
126.82	0.327859	0.311259	0.260311	0.188352
127.02	0.328216	0.311263	0.260819	0.189047
127.22	0.328808	0.311124	0.260518	0.18862
127.42	0.328797	0.311307	0.260469	0.18888
127.62	0.329135	0.31125	0.260082	0.188937
127.82	0.329226	0.310834	0.260311	0.188918
128.02	0.329142	0.310778	0.260269	0.183973
128.22	0.329533	0.310894	0.260021	0.186371
128.42	0.32988	0.311031	0.2601	0.189015
128.62	0.330284	0.31122	0.260038	0.191234
128.82	0.330169	0.311527	0.25982	0.193159
129.02	0.330195	0.311689	0.259829	0.19415
129.22	0.330279	0.311872	0.259418	0.195391
129.42	0.330258	0.311867	0.259633	0.196545
129.62	0.330212	0.312291	0.259725	0.197161
129.82	0.330551	0.31228	0.260353	0.197723
130.02	0.331002	0.312083	0.261007	0.197947
130.22	0.331175	0.312288	0.260873	0.197588
130.42	0.331381	0.312833	0.260872	0.197254
130.62	0.331716	0.313119	0.260968	0.196069
130.82	0.332293	0.313589	0.261092	0.194961
131.02	0.332535	0.314314	0.261175	0.193547
131.22	0.332941	0.314752	0.260465	0.191712
131.42	0.333061	0.315175	0.260414	0.19007
131.62	0.333541	0.315581	0.260325	0.187719
131.82	0.333808	0.315928	0.260647	0.18538
132.02	0.333837	0.316408	0.260395	0.18296
132.22	0.333785	0.316507	0.260384	0.187916
132.42	0.333551	0.316717	0.260386	0.188256
132.62	0.333728	0.316745	0.260258	0.188129
132.82	0.333486	0.316676	0.26023	0.188218
133.02	0.333542	0.316731	0.259997	0.188409
133.22	0.333458	0.316882	0.259818	0.188859
133.42	0.333494	0.316955	0.26015	0.189285
133.62	0.333966	0.316984	0.260126	0.189428
133.82	0.334221	0.31677	0.260451	0.189791
134.02	0.334455	0.316784	0.260652	0.190173
134.22	0.33427	0.317108	0.260365	0.190014
134.42	0.334783	0.317509	0.260533	0.189527
134.62	0.335079	0.317639	0.260588	0.189508
134.82	0.33551	0.318153	0.260636	0.18973
135.02	0.335815	0.318593	0.260895	0.189944
135.22	0.336273	0.318663	0.260919	0.18973
135.42	0.336655	0.318721	0.261285	0.19011
135.62	0.337212	0.31879	0.261167	0.18977
135.82	0.337761	0.318547	0.261207	0.189982
136.02	0.337702	0.318128	0.261092	0.190184
136.22	0.337786	0.317698	0.260713	0.189847
136.42	0.338062	0.317519	0.260771	0.189691
136.62	0.338337	0.317481	0.261108	0.189415
136.82	0.33872	0.317715	0.261432	0.189778
137.02	0.339243	0.317935	0.261268	0.189924
137.22	0.33958	0.318083	0.261321	0.190246
137.42	0.340011	0.318107	0.261598	0.189954
137.62	0.340335	0.318009	0.262013	0.1897
137.82	0.340584	0.318395	0.262294	0.189851
138.02	0.340808	0.318649	0.262271	0.189599
138.22	0.34102	0.318866	0.262316	0.189132
138.42	0.341473	0.319457	0.262609	0.188877
138.62	0.341594	0.319816	0.262874	0.189006
138.82	0.34162	0.320127	0.262719	0.189121
139.02	0.341532	0.320242	0.26288	0.189463
139.22	0.341526	0.320268	0.262906	0.189447
139.42	0.341934	0.320653	0.262718	0.18984
139.62	0.342244	0.320694	0.262624	0.190033
139.82	0.342308	0.320549	0.262871	0.190525
140.02	0.342258	0.320504	0.263135	0.190576
140.22	0.342959	0.320789	0.263319	0.190182
140.42	0.342922	0.320911	0.263613	0.19018
140.62	0.343247	0.321225	0.26395	0.190219
140.82	0.343634	0.321593	0.26395	0.190628
141.02	0.343872	0.32166	0.263742	0.190731
141.22	0.343807	0.321816	0.263753	0.190731
141.42	0.344115	0.321874	0.263942	0.190296
141.62	0.344375	0.322022	0.263765	0.190196
141.82	0.344783	0.321897	0.263305	0.190239
142.02	0.34519	0.321991	0.263073	0.189908
142.22	0.34556	0.322125	0.26321	0.18986
142.42	0.345778	0.322197	0.263227	0.18952
142.62	0.345987	0.321792	0.263214	0.189626
142.82	0.345817	0.321588	0.263042	0.189746
143.02	0.345941	0.321684	0.263029	0.190061
143.22	0.346076	0.32194	0.26319	0.190306
143.42	0.346388	0.321933	0.263583	0.190587
143.62	0.346561	0.321605	0.264184	0.190468
143.82	0.34642	0.321723	0.264506	0.190191
144.02	0.346442	0.321812	0.26484	0.190271
144.22	0.346645	0.322292	0.264771	0.19021
144.42	0.346511	0.322297	0.264968	0.190143
144.62	0.346572	0.322862	0.264997	0.190281
144.82	0.346529	0.323457	0.264851	0.190453
145.02	0.346579	0.323586	0.26475	0.19005
145.22	0.346739	0.323977	0.264852	0.190349
145.42	0.347546	0.324292	0.264645	0.190627
145.62	0.347707	0.32488	0.264648	0.190643
145.82	0.347936	0.325015	0.264648	0.190991
146.02	0.348425	0.325288	0.264993	0.190975
146.22	0.348385	0.325329	0.265253	0.191034
146.42	0.348922	0.325229	0.265164	0.190752
146.62	0.348994	0.325236	0.265939	0.191225
146.82	0.349096	0.325426	0.265954	0.19147
147.02	0.349002	0.325513	0.266022	0.19146
147.22	0.349161	0.325495	0.26634	0.191367
147.42	0.349573	0.32529	0.266521	0.191344
147.62	0.349723	0.325259	0.266271	0.191007
147.82	0.349612	0.325422	0.266601	0.191306
148.02	0.349994	0.325413	0.266852	0.191133
148.22	0.350542	0.32561	0.266846	0.190915
148.42	0.351043	0.325798	0.266904	0.190854
148.62	0.351123	0.326045	0.266192	0.190652
148.82	0.351293	0.326285	0.266076	0.190675
149.02	0.351791	0.326463	0.265879	0.190609
149.22	0.352291	0.327083	0.266138	0.191061
149.42	0.35263	0.327305	0.266256	0.190991
149.62	0.352642	0.328166	0.266274	0.191254
149.82	0.352997	0.328096	0.266134	0.191133
150.02	0.353358	0.328211	0.26669	0.191039
150.22	0.353428	0.328385	0.267019	0.19091
150.42	0.353627	0.328372	0.267474	0.19076
150.62	0.353447	0.328436	0.268308	0.190973
150.82	0.35382	0.328593	0.268167	0.191114
151.02	0.353716	0.328506	0.268511	0.190858
151.22	0.354324	0.328424	0.26881	0.191074
151.42	0.354558	0.328254	0.268999	0.191139
151.62	0.354931	0.328181	0.269332	0.191008
151.82	0.355247	0.328331	0.270015	0.191144
152.02	0.355762	0.328225	0.269583	0.190854
152.22	0.355995	0.328425	0.269585	0.191181
152.42	0.355974	0.328839	0.269186	0.191057
152.62	0.356028	0.329057	0.269066	0.190788
152.82	0.355926	0.329582	0.26908	0.19082
153.02	0.356144	0.329654	0.268819	0.190722
153.22	0.356194	0.329897	0.268998	0.190391
153.42	0.356442	0.329932	0.268427	0.190489
153.62	0.35684	0.330285	0.268247	0.190423
153.82	0.357034	0.330314	0.268163	0.19012
154.02	0.356953	0.331053	0.268481	0.190249
154.22	0.357368	0.331149	0.268349	0.190076
154.42	0.357921	0.33141	0.268485	0.190135
154.62	0.358171	0.331533	0.268583	0.190585
154.82	0.358395	0.331452	0.268776	0.190932
155.02	0.358491	0.331241	0.269079	0.19113
155.22	0.358861	0.331063	0.269014	0.191387
155.42	0.359002	0.330934	0.26909	0.190482
155.62	0.359348	0.330746	0.269256	0.189875
155.82	0.359268	0.330488	0.269526	0.191582
156.02	0.359351	0.330443	0.26962	0.193371
156.22	0.359433	0.330757	0.270129	0.194738
156.42	0.359471	0.330754	0.270369	0.195558
156.62	0.359681	0.330805	0.270423	0.196559
156.82	0.359466	0.330957	0.270087	0.197385
157.02	0.359639	0.330944	0.270301	0.197599
157.22	0.359772	0.331112	0.27014	0.197726
157.42	0.360006	0.331532	0.26994	0.197704
157.62	0.360488	0.33177	0.270104	0.197465
157.82	0.36062	0.332523	0.269941	0.197342
158.02	0.361298	0.333017	0.270082	0.1965
158.22	0.361818	0.333129	0.269901	0.195936
158.42	0.362238	0.333318	0.270004	0.195403
158.62	0.362032	0.333312	0.270045	0.194659
158.82	0.362595	0.333556	0.270308	0.193267
159.02	0.363214	0.334087	0.270209	0.192361
159.22	0.363361	0.334245	0.27014	0.191172
159.42	0.363344	0.33437	0.270521	0.189852
159.62	0.363592	0.334325	0.271193	0.190177
159.82	0.363685	0.334536	0.271449	0.191908
160.02	0.363856	0.335033	0.271665	0.192177
160.22	0.363664	0.335102	0.271771	0.192441
160.42	0.363355	0.335186	0.271681	0.192458
160.62	0.363365	0.335455	0.271623	0.192642
160.82	0.363148	0.335722	0.27155	0.192807
161.02	0.363004	0.335736	0.271945	0.192975
161.22	0.362991	0.335676	0.271967	0.193061
161.42	0.363286	0.335758	0.271753	0.193148
161.62	0.363797	0.33576	0.271778	0.193108
161.82	0.364012	0.335958	0.271698	0.193074
162.02	0.364479	0.335971	0.271702	0.192948
162.22	0.364769	0.336296	0.271464	0.193158
162.42	0.365561	0.336206	0.271611	0.193317
162.62	0.365963	0.336298	0.271931	0.193062
162.82	0.366601	0.336566	0.271731	0.192834
163.02	0.366935	0.336899	0.271751	0.193024
163.22	0.367291	0.33667	0.272074	0.192737
163.42	0.367427	0.336501	0.272726	0.192711
163.62	0.367912	0.336388	0.272983	0.192577
163.82	0.3679	0.336602	0.272496	0.192497
164.02	0.368052	0.336761	0.27262	0.192416
164.22	0.367875	0.336727	0.272486	0.192492
164.42	0.368128	0.336851	0.272208	0.192283
164.62	0.368209	0.336987	0.272064	0.192292
164.82	0.368136	0.337041	0.271923	0.192417
165.02	0.368178	0.336985	0.272259	0.192628
165.22	0.368316	0.336952	0.272146	0.192732
165.42	0.368467	0.336944	0.271882	0.192641
165.62	0.368506	0.337094	0.27217	0.192732
165.82	0.368354	0.337307	0.272236	0.19322
166.02	0.368408	0.337657	0.272227	0.193297
166.22	0.369106	0.337519	0.272483	0.193248
166.42	0.369707	0.337137	0.272701	0.193576
166.62	0.369882	0.337347	0.273277	0.193582
166.82	0.37029	0.33726	0.272975	0.193261
167.02	0.370951	0.337198	0.2734	0.193265
167.22	0.37145	0.337087	0.273617	0.193245
167.42	0.371398	0.337354	0.274005	0.193258
167.62	0.371789	0.337844	0.273982	0.193077
167.82	0.37204	0.338301	0.273694	0.192946
168.02	0.372385	0.338665	0.273527	0.192963
168.22	0.372663	0.338887	0.273099	0.19286
168.42	0.372978	0.338903	0.272944	0.192855
168.62	0.372874	0.339264	0.272929	0.192838
168.82	0.373166	0.339681	0.273207	0.192795
169.02	0.373201	0.339822	0.273288	0.193224
169.22	0.373236	0.339972	0.273361	0.193435
169.42	0.373472	0.340339	0.273297	0.193343
169.62	0.373419	0.340806	0.273429	0.193421
169.82	0.373453	0.340824	0.273369	0.193239
170.02	0.373834	0.340883	0.273269	0.192867
170.22	0.374348	0.34061	0.273467	0.192597
170.42	0.374311	0.340636	0.27352	0.192283
170.62	0.3743	0.340865	0.273852	0.192153
170.82	0.37474	0.340661	0.273884	0.192017
171.02	0.375063	0.340773	0.273934	0.192224
171.22	0.374647	0.341014	0.274118	0.19189
171.42	0.374583	0.341101	0.274623	0.192344
171.62	0.374749	0.340981	0.274794	0.192507
171.82	0.374984	0.340959	0.274443	0.192701
172.02	0.374985	0.340851	0.274145	0.192771
172.22	0.375385	0.340833	0.274157	0.192839
172.42	0.375627	0.340736	0.274548	0.193212
172.62	0.375968	0.341262	0.274714	0.193508
172.82	0.376273	0.341632	0.274826	0.193721
173.02	0.376452	0.3417	0.274905	0.194272
173.22	0.377127	0.342026	0.274714	0.194156
173.42	0.377442	0.342622	0.274343	0.193911
173.62	0.37744	0.342627	0.274214	0.193812
173.82	0.377535	0.342687	0.273796	0.193915
174.02	0.377544	0.343171	0.273606	0.193852
174.22	0.3774	0.343268	0.273487	0.193847
174.42	0.377633	0.343368	0.273532	0.193602
174.62	0.377853	0.343675	0.273708	0.193809
174.82	0.378155	0.343554	0.273688	0.193822
175.02	0.377999	0.343422	0.273543	0.19357
175.22	0.37774	0.343406	0.273789	0.193359
175.42	0.378391	0.343262	0.273881	0.193824
175.62	0.378658	0.343276	0.273984	0.193409
175.82	0.379146	0.343484	0.273991	0.19336
176.02	0.379747	0.343707	0.274146	0.193115
176.22	0.38011	0.343928	0.274469	0.193267
176.42	0.380253	0.344211	0.274788	0.193267
176.62	0.380785	0.344623	0.274791	0.193378
176.82	0.380765	0.344603	0.274838	0.193378
177.02	0.381322	0.3448	0.275248	0.193522
177.22	0.381524	0.345043	0.275516	0.193586
177.42	0.381511	0.345418	0.2756	0.193599
177.62	0.381814	0.34542	0.275662	0.193771
177.82	0.382049	0.345774	0.275574	0.193923
178.02	0.381973	0.345875	0.275792	0.193814
178.22	0.382053	0.345798	0.275832	0.193731
178.42	0.382517	0.345931	0.276012	0.193614
178.62	0.382526	0.34586	0.276109	0.19382
178.82	0.382625	0.345587	0.27615	0.194019
179.02	0.382926	0.345798	0.276099	0.194385
179.22	0.383268	0.345765	0.275965	0.194194
179.42	0.383955	0.346088	0.276128	0.194077
179.62	0.384059	0.346275	0.276487	0.193979
179.82	0.384434	0.346109	0.276622	0.194153
180.02	0.384911	0.346154	0.276421	0.193943
180.22	0.384627	0.346191	0.276467	0.19402
180.42	0.384815	0.34659	0.276693	0.194089
180.62	0.385194	0.346709	0.276941	0.194053
180.82	0.385072	0.346596	0.27744	0.193935
181.02	0.385263	0.346972	0.278215	0.193841
181.22	0.385112	0.346958	0.278139	0.193873
181.42	0.38568	0.347206	0.278165	0.193494
181.62	0.386096	0.347265	0.278439	0.193589
181.82	0.386116	0.347623	0.278809	0.193415
182.02	0.386207	0.347676	0.278685	0.193137
182.22	0.386451	0.347724	0.278368	0.193321
182.42	0.387045	0.348155	0.278628	0.193196
182.62	0.387175	0.348291	0.278556	0.193183
182.82	0.387405	0.34808	0.278234	0.193426
183.02	0.387707	0.34851	0.278071	0.193698
183.22	0.38752	0.348407	0.277782	0.19333
183.42	0.387719	0.348691	0.278199	0.193881
183.62	0.387702	0.348832	0.277987	0.194033
183.82	0.387673	0.348586	0.277984	0.194196
184.02	0.387668	0.348925	0.278192	0.19411
184.22	0.387432	0.349139	0.278613	0.194312
184.42	0.387719	0.349531	0.27895	0.194212
184.62	0.387721	0.349314	0.278877	0.194067
184.82	0.387697	0.349436	0.278626	0.194277
185.02	0.3878	0.349693	0.278749	0.194313
185.22	0.388121	0.349608	0.27816	0.194414
185.42	0.388392	0.34989	0.278554	0.194081
185.62	0.388717	0.34999	0.278542	0.193942
185.82	0.388885	0.350339	0.278455	0.193816
186.02	0.389242	0.350456	0.277811	0.193764
186.22	0.389615	0.350579	0.277569	0.193725
186.42	0.389908	0.350905	0.277396	0.193408
186.62	0.390045	0.350543	0.277042	0.19362
186.82	0.390353	0.350115	0.277132	0.193675
187.02	0.390658	0.350384	0.277402	0.193671
187.22	0.390822	0.350198	0.277066	0.19392
187.42	0.391224	0.350447	0.277591	0.194186
187.62	0.391643	0.350945	0.27745	0.194233
187.82	0.391741	0.351192	0.277737	0.19452
188.02	0.391961	0.35149	0.278172	0.1944
188.22	0.392232	0.35145	0.278422	0.194393
188.42	0.392215	0.351623	0.278686	0.194241
188.62	0.392469	0.351707	0.278854	0.194392
188.82	0.392453	0.352098	0.279036	0.194434
189.02	0.392468	0.352399	0.279449	0.194449
189.22	0.392642	0.352566	0.279058	0.194556
189.42	0.392687	0.352718	0.279476	0.194161
189.62	0.392781	0.352644	0.27942	0.194067
189.82	0.392485	0.352676	0.279606	0.194383
190.02	0.392423	0.352797	0.27978	0.194586
190.22	0.392396	0.352866	0.279985	0.194643
190.42	0.391994	0.353057	0.280182	0.19447
190.62	0.392259	0.353044	0.28057	0.19458
190.82	0.392618	0.353021	0.280551	0.194364
191.02	0.39292	0.353274	0.280429	0.194225
191.22	0.393188	0.353544	0.280279	0.194319
191.42	0.393742	0.354103	0.280364	0.194255
191.62	0.394191	0.354537	0.280123	0.19451
191.82	0.394299	0.354899	0.280047	0.194417
192.02	0.394566	0.35501	0.280164	0.194169
192.22	0.395023	0.354962	0.280099	0.193988
192.42	0.395359	0.355119	0.279995	0.193785
192.62	0.395873	0.355302	0.279941	0.193662
192.82	0.395886	0.355451	0.279758	0.194021
193.02	0.396493	0.35566	0.279507	0.194131
193.22	0.3967	0.355478	0.27945	0.194294
193.42	0.396727	0.355123	0.279932	0.194398
193.62	0.396366	0.354652	0.280252	0.195035
193.82	0.396642	0.354476	0.280593	0.195631
194.02	0.396859	0.354591	0.281131	0.195947
194.22	0.397061	0.355014	0.281615	0.195883
194.42	0.397119	0.354971	0.281688	0.196157
194.62	0.397589	0.354911	0.28145	0.19506
194.82	0.397853	0.354803	0.281394	0.195113
195.02	0.397947	0.355038	0.281664	0.195436
195.22	0.398302	0.355264	0.281499	0.19561
195.42	0.398582	0.355333	0.281326	0.196041
195.62	0.398708	0.355705	0.281626	0.196389
195.82	0.399049	0.355806	0.281434	0.196374
196.02	0.399335	0.355871	0.281323	0.196632
196.22	0.399447	0.355541	0.281231	0.19661
196.42	0.399619	0.355706	0.281624	0.196614
196.62	0.399823	0.356027	0.281473	0.196593
196.82	0.40007	0.356094	0.280952	0.196912
197.02	0.40027	0.356284	0.280856	0.19678
197.22	0.400131	0.356178	0.280948	0.196754
197.42	0.400675	0.356201	0.280779	0.197168
197.62	0.4008	0.356247	0.280568	0.197219
197.82	0.401814	0.356786	0.280427	0.196756
198.02	0.40213	0.357181	0.280326	0.196667
198.22	0.402484	0.357481	0.280178	0.196462
198.42	0.402679	0.357561	0.280224	0.196084
198.62	0.402754	0.357749	0.28006	0.194978
198.82	0.403243	0.358212	0.280321	0.196081
199.02	0.403361	0.358563	0.280294	0.196152
199.22	0.403682	0.358786	0.280178	0.196096
199.42	0.403731	0.358667	0.280747	0.196369
199.62	0.404011	0.358839	0.281484	0.196233
199.82	0.404004	0.358423	0.281544	0.196183
200.02	0.403891	0.358504	0.282016	0.196568
200.22	0.403919	0.35817	0.282428	0.196479
200.42	0.404088	0.358089	0.282784	0.196034
200.62	0.403873	0.358335	0.2823	0.195909
200.82	0.403773	0.358347	0.282126	0.195546
201.02	0.403793	0.35835	0.282406	0.195878
201.22	0.403749	0.358264	0.282542	0.195761
201.42	0.404086	0.358466	0.282545	0.196323
201.62	0.403967	0.358429	0.28265	0.196174
201.82	0.404389	0.358909	0.282703	0.196291
202.02	0.404359	0.35891	0.282664	0.196888
202.22	0.404692	0.359028	0.282733	0.197146
202.42	0.404978	0.359178	0.282915	0.197461
202.62	0.405225	0.359627	0.28266	0.197546
202.82	0.405617	0.360032	0.282853	0.197855
203.02	0.405603	0.360165	0.282887	0.197734
203.22	0.406136	0.360432	0.282932	0.197236
203.42	0.406223	0.360496	0.283048	0.196731
203.62	0.406384	0.360971	0.283409	0.1962
203.82	0.406426	0.361093	0.283325	0.196022
204.02	0.406765	0.361321	0.283754	0.195705
204.22	0.407364	0.361334	0.28422	0.195326
204.42	0.407624	0.361619	0.284246	0.194636
204.62	0.407598	0.362151	0.28447	0.194703
204.82	0.407882	0.361934	0.284613	0.194777
205.02	0.408115	0.361822	0.284823	0.195289
205.22	0.408203	0.361797	0.284933	0.195169
205.42	0.408778	0.361808	0.285265	0.1954
205.62	0.40884	0.361708	0.285463	0.195386
205.82	0.409278	0.362047	0.285364	0.195953
206.02	0.409347	0.362193	0.285149	0.196206
206.22	0.409692	0.36193	0.284795	0.196574
206.42	0.409643	0.361814	0.28442	0.196786
206.62	0.409699	0.361895	0.283985	0.196587
206.82	0.409806	0.361862	0.283555	0.196558
207.02	0.410125	0.361945	0.28303	0.196142
207.22	0.410076	0.362145	0.282676	0.195608
207.42	0.409977	0.362179	0.282516	0.195253
207.62	0.409952	0.362508	0.282651	0.195128
207.82	0.410013	0.362295	0.28242	0.195003
208.02	0.410094	0.362406	0.282654	0.194929
208.22	0.410647	0.362721	0.283125	0.194883
208.42	0.410558	0.363056	0.283127	0.194917
208.62	0.410682	0.363027	0.28357	0.195134
208.82	0.410735	0.362826	0.283781	0.195219
209.02	0.410844	0.363159	0.284039	0.195209
209.22	0.411002	0.363355	0.284493	0.195462
209.42	0.411256	0.363672	0.285015	0.19539
209.62	0.411207	0.363969	0.285511	0.195397
209.82	0.411482	0.364402	0.285829	0.195489
210.02	0.411275	0.364803	0.285834	0.195259
210.22	0.411457	0.364713	0.285771	0.195423
210.42	0.4119	0.364791	0.285633	0.195268
210.62	0.412395	0.365266	0.285652	0.19536
210.82	0.41247	0.365524	0.285777	0.19525
211.02	0.412759	0.365622	0.286087	0.19514
211.22	0.412916	0.36551	0.286235	0.194982
211.42	0.413195	0.365615	0.286084	0.194832
211.62	0.41314	0.365901	0.286048	0.194757
211.82	0.413542	0.365972	0.285874	0.194572
212.02	0.414168	0.365801	0.286148	0.194733
212.22	0.414698	0.365713	0.286239	0.194818
212.42	0.414925	0.365471	0.285791	0.195353
212.62	0.415362	0.365218	0.285837	0.195442
212.82	0.41548	0.364954	0.285998	0.195597
213.02	0.41579	0.365376	0.285705	0.195786
213.22	0.41627	0.365441	0.285819	0.19609
213.42	0.416635	0.365565	0.285525	0.196108
213.62	0.416621	0.365699	0.285722	0.195952
213.82	0.417064	0.365826	0.285486	0.196002
214.02	0.416913	0.366174	0.285037	0.19615
214.22	0.417139	0.366132	0.284971	0.196311
214.42	0.417777	0.366726	0.284704	0.196206
214.62	0.41756	0.367413	0.284706	0.196172
214.82	0.41733	0.367124	0.2851	0.196049
215.02	0.417476	0.36713	0.285139	0.195776
215.22	0.4174	0.367285	0.28518	0.195452
215.42	0.417167	0.367623	0.285422	0.195299
215.62	0.41741	0.367588	0.285816	0.19519
215.82	0.417896	0.367461	0.285705	0.195265
216.02	0.418127	0.367186	0.286081	0.195441
216.22	0.418114	0.367035	0.285955	0.195558
216.42	0.418538	0.366882	0.286159	0.195582
216.62	0.418717	0.367	0.286626	0.195344
216.82	0.418736	0.36709	0.286937	0.195368
217.02	0.418915	0.367525	0.286981	0.195699
217.22	0.419273	0.367285	0.28705	0.195693
217.42	0.419427	0.367329	0.286814	0.195422
217.62	0.419534	0.367155	0.286736	0.195567
217.82	0.419945	0.367342	0.286566	0.196073
218.02	0.419801	0.367791	0.286277	0.196302
218.22	0.419755	0.368205	0.28623	0.196182
218.42	0.419994	0.36879	0.285685	0.196158
218.62	0.419592	0.368502	0.285832	0.19616
218.82	0.419734	0.368437	0.285951	0.196179
219.02	0.419899	0.368762	0.285898	0.195886
219.22	0.419951	0.369112	0.286096	0.19596
219.42	0.419963	0.369121	0.285895	0.196133
219.62	0.420411	0.36916	0.285934	0.195624
219.82	0.42066	0.369713	0.285982	0.195373
220.02	0.421028	0.370065	0.286312	0.194839
220.22	0.421424	0.370471	0.286392	0.194506
220.42	0.421684	0.370813	0.286647	0.194416
220.62	0.421997	0.371103	0.286772	0.194609
220.82	0.422275	0.371402	0.286752	0.194911
221.02	0.422822	0.3712	0.286665	0.19496
221.22	0.423215	0.371004	0.28647	0.194948
221.42	0.423484	0.371075	0.286653	0.195301
221.62	0.423789	0.371045	0.286721	0.195998
221.82	0.42405	0.371222	0.286735	0.196123
222.02	0.424327	0.371153	0.28689	0.196248
222.22	0.424583	0.371274	0.287006	0.196323
222.42	0.424844	0.371197	0.286654	0.196428
222.62	0.424851	0.37109	0.287055	0.196617
222.82	0.425175	0.371135	0.287361	0.19647
223.02	0.425313	0.371344	0.287748	0.196673
223.22	0.425662	0.371448	0.28785	0.196677
223.42	0.42558	0.371348	0.28776	0.196428
223.62	0.425707	0.371391	0.287943	0.195761
223.82	0.425784	0.371706	0.288098	0.195693
224.02	0.425876	0.371827	0.287696	0.195404
224.22	0.425546	0.371974	0.287471	0.195602
224.42	0.425557	0.372088	0.287258	0.195779
224.62	0.42573	0.372285	0.287077	0.195893
224.82	0.425388	0.372291	0.286812	0.196023
225.02	0.425298	0.372244	0.286767	0.196139
225.22	0.425159	0.372344	0.286942	0.19622
225.42	0.425235	0.372624	0.287156	0.1967
225.62	0.425479	0.372708	0.287093	0.195485
225.82	0.425787	0.37305	0.287241	0.196021
226.02	0.425801	0.373234	0.287487	0.196595
226.22	0.42618	0.373555	0.287374	0.196906
226.42	0.42619	0.373715	0.287546	0.197057
226.62	0.426408	0.373845	0.287852	0.197288
226.82	0.426929	0.373775	0.287955	0.197295
227.02	0.42729	0.374345	0.288211	0.197614
227.22	0.427696	0.374203	0.288289	0.197806
227.42	0.427986	0.374106	0.288009	0.197905
227.62	0.428301	0.374021	0.287863	0.198038
227.82	0.42861	0.374244	0.287696	0.197899
228.02	0.428733	0.374441	0.287862	0.197687
228.22	0.429011	0.374429	0.287865	0.197883
228.42	0.429346	0.374379	0.288153	0.197701
228.62	0.429631	0.374129	0.28814	0.197434
228.82	0.429455	0.374119	0.288317	0.19733
229.02	0.429688	0.37422	0.28861	0.197146
229.22	0.429693	0.374256	0.288857	0.196485
229.42	0.429667	0.374667	0.288966	0.196252
229.62	0.429768	0.374792	0.288911	0.195197
229.82	0.430053	0.374975	0.288759	0.196436
230.02	0.430145	0.374738	0.288785	0.196266
230.22	0.430576	0.37499	0.289195	0.196469
230.42	0.430388	0.375324	0.289388	0.19656
230.62	0.430636	0.375869	0.289181	0.196258
230.82	0.431086	0.375967	0.289037	0.196199
231.02	0.431235	0.376384	0.288882	0.196472
231.22	0.431534	0.376267	0.28876	0.196557
231.42	0.432154	0.376115	0.288733	0.196636
231.62	0.432229	0.376116	0.28893	0.196678
231.82	0.432399	0.376379	0.289298	0.196229
232.02	0.432694	0.37632	0.289499	0.196115
232.22	0.432863	0.376193	0.289399	0.196792
232.42	0.432972	0.376162	0.289627	0.196788
232.62	0.43323	0.376149	0.289383	0.19681
232.82	0.433132	0.376248	0.28968	0.197004
233.02	0.433131	0.376425	0.289806	0.197032
233.22	0.433106	0.376567	0.289516	0.196975
233.42	0.433236	0.376764	0.289616	0.197039
233.62	0.433647	0.376692	0.289218	0.197242
233.82	0.433744	0.376654	0.289214	0.197319
234.02	0.433847	0.376794	0.289401	0.197341
234.22	0.433731	0.37724	0.289621	0.197724
234.42	0.433642	0.377277	0.289369	0.197612
234.62	0.434063	0.377307	0.289031	0.197185
234.82	0.434453	0.377368	0.288921	0.196978
235.02	0.434669	0.377386	0.289137	0.19697
235.22	0.435001	0.377264	0.289616	0.196761
235.42	0.435381	0.377092	0.289793	0.197018
235.62	0.4355	0.376993	0.29	0.197054
235.82	0.4359	0.377105	0.290524	0.197158
236.02	0.436318	0.376977	0.290785	0.197492
236.22	0.436544	0.377102	0.291285	0.197879
236.42	0.437283	0.3773	0.291351	0.197622
236.62	0.437483	0.377295	0.291415	0.197705
236.82	0.43794	0.377487	0.291912	0.197753
237.02	0.438146	0.37807	0.292115	0.198032
237.22	0.438452	0.378313	0.292236	0.198009
237.42	0.438259	0.378673	0.29261	0.197712
237.62	0.438194	0.379053	0.291991	0.197492
237.82	0.437948	0.379161	0.291812	0.197008
238.02	0.438101	0.379191	0.291575	0.19697
238.22	0.437648	0.379244	0.291759	0.197001
238.42	0.437464	0.37918	0.29154	0.196621
238.62	0.437415	0.379266	0.291306	0.196263
238.82	0.437074	0.379546	0.291437	0.19601
239.02	0.43722	0.379586	0.290942	0.196176
239.22	0.437059	0.379382	0.290871	0.196419
239.42	0.437085	0.378875	0.2905	0.196682
239.62	0.436853	0.378155	0.290759	0.196636
239.82	0.437215	0.378028	0.290766	0.19703
240.02	0.437472	0.377862	0.290685	0.197124
240.22	0.437591	0.378023	0.290579	0.197373
240.42	0.438219	0.378176	0.290575	0.197699
240.62	0.438165	0.37834	0.29068	0.198168
240.82	0.438843	0.378224	0.290919	0.198188
241.02	0.439107	0.378539	0.291289	0.198121
241.22	0.439442	0.378673	0.291449	0.197823
241.42	0.439813	0.378983	0.291349	0.197511
241.62	0.440473	0.379169	0.291168	0.197482
241.82	0.441113	0.379146	0.291639	0.197732
242.02	0.441715	0.379043	0.292314	0.197776
242.22	0.442018	0.379273	0.292713	0.197901
242.42	0.44253	0.37937	0.293271	0.19793
242.62	0.443015	0.379823	0.293441	0.197887
242.82	0.443262	0.380241	0.293645	0.197707
243.02	0.443879	0.380385	0.29329	0.197763
243.22	0.443996	0.380182	0.293702	0.197572
243.42	0.4439	0.380358	0.29353	0.197468
243.62	0.443568	0.380381	0.293167	0.197277
243.82	0.443578	0.380649	0.292867	0.197512
244.02	0.443241	0.380778	0.292521	0.197269
244.22	0.44289	0.380808	0.292263	0.197415
244.42	0.442915	0.380867	0.291951	0.19744
244.62	0.442346	0.381071	0.291525	0.197316
244.82	0.442441	0.381147	0.291619	0.196579
245.02	0.442157	0.381566	0.291557	0.196117
245.22	0.442371	0.381771	0.291081	0.196087
245.42	0.442491	0.381759	0.291083	0.196062
245.62	0.442634	0.38187	0.291347	0.196541
245.82	0.442777	0.382118	0.291751	0.196587
246.02	0.443102	0.382047	0.291983	0.196531
246.22	0.443199	0.382103	0.292096	0.196383
246.42	0.443474	0.382224	0.292518	0.196407
246.62	0.443863	0.382602	0.292572	0.196312
246.82	0.444209	0.382875	0.292518	0.196348
247.02	0.44478	0.382877	0.29243	0.196165
247.22	0.445157	0.383241	0.292671	0.19596
247.42	0.44487	0.383533	0.292766	0.195903
247.62	0.444808	0.383614	0.292688	0.195874
247.82	0.444908	0.383694	0.292876	0.194268
248.02	0.44515	0.384009	0.292651	0.195142
248.22	0.445585	0.384238	0.292752	0.196421
248.42	0.446004	0.384412	0.292624	0.197175
248.62	0.446323	0.384833	0.292545	0.197794
248.82	0.44664	0.385248	0.292705	0.198328
249.02	0.446758	0.384883	0.292716	0.198939
249.22	0.4471	0.384561	0.292658	0.19929
249.42	0.446834	0.384293	0.292852	0.199755
249.62	0.446925	0.384352	0.292951	0.200301
249.82	0.447025	0.384153	0.292899	0.20016
250.02	0.447041	0.383734	0.292414	0.199908
250.22	0.447365	0.383467	0.292406	0.199477
250.42	0.447838	0.383628	0.292509	0.199234
250.62	0.448424	0.383753	0.292651	0.199103
250.82	0.44885	0.383946	0.29261	0.198664
251.02	0.449204	0.384026	0.292723	0.197997
251.22	0.449369	0.384563	0.29296	0.197188
251.42	0.449215	0.385	0.293124	0.196344
251.62	0.449332	0.385478	0.293206	0.1954
251.82	0.449913	0.385766	0.292948	0.194326
252.02	0.450355	0.386388	0.292983	0.196168
252.22	0.4503	0.386525	0.292837	0.196358
252.42	0.450417	0.386835	0.29268	0.196224
252.62	0.45043	0.387116	0.292868	0.196305
252.82	0.450203	0.38709	0.293244	0.196111
253.02	0.45003	0.38675	0.293572	0.195987
253.22	0.449879	0.386708	0.293513	0.196082
253.42	0.449592	0.386362	0.293929	0.196316
253.62	0.449712	0.386201	0.294029	0.196707
253.82	0.449787	0.38606	0.29392	0.196768
254.02	0.449686	0.386456	0.293565	0.196465
254.22	0.450195	0.386624	0.293609	0.196485
254.42	0.450638	0.38665	0.293843	0.196516
254.62	0.450919	0.386533	0.293813	0.196988
254.82	0.451196	0.386569	0.293982	0.197024
255.02	0.451427	0.386598	0.294127	0.197093
255.22	0.451876	0.387097	0.294346	0.196903
255.42	0.451975	0.387448	0.294457	0.197075
255.62	0.452483	0.387724	0.294101	0.190899
255.82	0.452807	0.388028	0.293682	0.194685
256.02	0.452973	0.38868	0.29368	0.197772
256.22	0.452676	0.388659	0.293563	0.200162
256.42	0.453122	0.388514	0.293849	0.202462
256.62	0.453299	0.388347	0.294354	0.204145
256.82	0.453407	0.388096	0.29503	0.205783
257.02	0.453577	0.388073	0.295124	0.207246
257.22	0.453587	0.387903	0.295543	0.20793
257.42	0.453659	0.387867	0.295727	0.20823
257.62	0.453825	0.387997	0.295624	0.20841
257.82	0.453478	0.388169	0.295454	0.207837
258.02	0.453481	0.388288	0.295427	0.206614
258.22	0.453495	0.388005	0.29521	0.205659
258.42	0.453951	0.387805	0.295308	0.2042
258.62	0.45385	0.387984	0.295298	0.202877
258.82	0.453891	0.388001	0.295468	0.201222
259.02	0.453967	0.388212	0.295713	0.199131
259.22	0.454214	0.388689	0.295385	0.196424
259.42	0.454353	0.388711	0.294932	0.193531
259.62	0.45459	0.38914	0.294339	0.19027
259.82	0.454471	0.389324	0.294299	0.196499
260.02	0.454819	0.389509	0.294092	0.1966
260.22	0.45507	0.389006	0.29423	0.196762
260.42	0.455284	0.388958	0.294369	0.197157
260.62	0.45554	0.389029	0.294618	0.197195
260.82	0.455878	0.389208	0.295013	0.197561
261.02	0.456116	0.389645	0.295189	0.197644
261.22	0.456107	0.389644	0.295624	0.197591
261.42	0.456331	0.389939	0.295696	0.197756
261.62	0.456388	0.389775	0.296187	0.197596
261.82	0.456395	0.389836	0.296133	0.197402
262.02	0.457062	0.389815	0.296017	0.19723
262.22	0.457039	0.390031	0.296125	0.197175
262.42	0.457622	0.390525	0.296297	0.196927
262.62	0.458017	0.390849	0.296448	0.197056
262.82	0.458357	0.391078	0.296587	0.197338
263.02	0.458628	0.391608	0.296647	0.196749
263.22	0.458947	0.391757	0.296273	0.196505
263.42	0.459426	0.391669	0.296296	0.196265
263.62	0.459694	0.392206	0.296213	0.196005
263.82	0.459993	0.391796	0.296002	0.195418
264.02	0.4604	0.391285	0.295741	0.195439
264.22	0.460621	0.390829	0.296023	0.195201
264.42	0.460578	0.390912	0.296234	0.195344
264.62	0.460625	0.390898	0.296578	0.195538
264.82	0.460616	0.391037	0.296995	0.196067
265.02	0.460356	0.391154	0.297144	0.196183
265.22	0.460219	0.390998	0.297414	0.196217
265.42	0.460282	0.391206	0.297288	0.196299
265.62	0.460496	0.390949	0.297583	0.195985
265.82	0.460708	0.39156	0.297282	0.196179
266.02	0.460658	0.391581	0.297396	0.196245
266.22	0.460359	0.39189	0.297513	0.196444
266.42	0.460635	0.392113	0.2975	0.196697
266.62	0.460851	0.392409	0.297329	0.197062
266.82	0.461117	0.392901	0.297489	0.197249
267.02	0.461572	0.393252	0.297369	0.197055
267.22	0.461789	0.393096	0.297379	0.197308
267.42	0.461972	0.392996	0.29782	0.197148
267.62	0.462115	0.393197	0.297749	0.196979
267.82	0.462515	0.393086	0.297775	0.19707
268.02	0.462567	0.393164	0.29791	0.197444
268.22	0.462736	0.393576	0.298181	0.197499
268.42	0.46287	0.394067	0.29816	0.197767
268.62	0.462989	0.394157	0.298187	0.197942
268.82	0.463385	0.394171	0.297679	0.197668
269.02	0.463499	0.394317	0.297394	0.197372
269.22	0.463763	0.394267	0.297135	0.197029
269.42	0.464203	0.394216	0.296636	0.197024
269.62	0.464659	0.394251	0.296734	0.196757
269.82	0.464586	0.394504	0.296552	0.19713
270.02	0.464541	0.394027	0.296733	0.197024
270.22	0.464452	0.393929	0.296241	0.197138
270.42	0.464734	0.393775	0.296386	0.196989
270.62	0.464953	0.39392	0.296319	0.197013
270.82	0.465324	0.393833	0.296535	0.197026
271.02	0.464977	0.393518	0.296788	0.197065
271.22	0.464299	0.393603	0.297122	0.197002
271.42	0.464083	0.39389	0.297829	0.196571
271.62	0.464404	0.394321	0.297955	0.196533
271.82	0.464636	0.394882	0.297993	0.196699
272.02	0.464582	0.395128	0.298125	0.196624
272.22	0.464801	0.395511	0.298538	0.196458
272.42	0.464977	0.395772	0.299088	0.196701
272.62	0.465236	0.395638	0.298968	0.196672
272.82	0.465495	0.395798	0.298433	0.196425
273.02	0.465415	0.395747	0.298496	0.1964
273.22	0.465833	0.39606	0.298406	0.196401
273.42	0.466447	0.396023	0.29857	0.19659
273.62	0.466488	0.396292	0.298673	0.196711
273.82	0.46653	0.39624	0.299012	0.197324
274.02	0.466883	0.396409	0.29921	0.197261
274.22	0.467225	0.396404	0.299021	0.19793
274.42	0.467464	0.396386	0.29923	0.197937
274.62	0.467633	0.396586	0.29911	0.198107
274.82	0.467884	0.396594	0.298957	0.197978
275.02	0.467514	0.396742	0.299163	0.197713
275.22	0.467585	0.397194	0.299052	0.197871
275.42	0.468181	0.397185	0.299077	0.19777
275.62	0.468788	0.397169	0.298883	0.197607
275.82	0.469051	0.397289	0.298809	0.197857
276.02	0.469329	0.397365	0.29903	0.197946
276.22	0.469507	0.397455	0.299398	0.198043
276.42	0.46983	0.397655	0.299487	0.198056
276.62	0.469873	0.397721	0.299131	0.197971
276.82	0.47003	0.397618	0.299144	0.197672
277.02	0.470033	0.397545	0.299197	0.197768
277.22	0.470231	0.397598	0.299611	0.197848
277.42	0.470233	0.397429	0.299945	0.197825
277.62	0.469971	0.397642	0.299514	0.197924
277.82	0.470234	0.397785	0.299816	0.198009
278.02	0.470252	0.398095	0.299912	0.198221
278.22	0.470353	0.398341	0.299761	0.198422
278.42	0.470429	0.398943	0.29977	0.197898
278.62	0.470676	0.399206	0.299636	0.197929
278.82	0.470915	0.399117	0.299521	0.197785
279.02	0.470739	0.399634	0.299555	0.197622
279.22	0.471096	0.399715	0.299614	0.197775
279.42	0.471509	0.399453	0.299499	0.197738
279.62	0.471801	0.399639	0.299475	0.197499
279.82	0.4724	0.399567	0.299406	0.197653
280.02	0.472676	0.399761	0.299474	0.197703
280.22	0.473018	0.39976	0.299266	0.197949
280.42	0.473366	0.40008	0.299029	0.198053
280.62	0.473424	0.40002	0.299289	0.198238
280.82	0.473644	0.399589	0.299125	0.198544
281.02	0.474072	0.39962	0.298979	0.198612
281.22	0.474101	0.399424	0.299057	0.198362
281.42	0.474302	0.399603	0.298752	0.198336
281.62	0.474395	0.39993	0.298609	0.198303
281.82	0.474484	0.400118	0.298929	0.19848
282.02	0.474476	0.400254	0.29898	0.19863
282.22	0.474823	0.400562	0.298494	0.198252
282.42	0.474789	0.400466	0.29892	0.197833
282.62	0.474688	0.400257	0.299163	0.197619
282.82	0.474764	0.400654	0.299098	0.197472
283.02	0.474716	0.400837	0.299325	0.19739
283.22	0.474987	0.400736	0.299567	0.197453
283.42	0.475125	0.400661	0.299591	0.197437
283.62	0.475221	0.400877	0.299798	0.197304
283.82	0.475498	0.400719	0.299856	0.197001
284.02	0.47524	0.400527	0.300062	0.19704
284.22	0.47504	0.400771	0.299941	0.197304
284.42	0.47494	0.400982	0.300114	0.197487
284.62	0.474861	0.401186	0.300207	0.197551
284.82	0.475207	0.401082	0.300125	0.197815
285.02	0.475597	0.401299	0.300461	0.197448
285.22	0.475581	0.401583	0.300512	0.197084
285.42	0.475793	0.401885	0.300635	0.197069
285.62	0.475934	0.402361	0.301099	0.197212
285.82	0.476106	0.402122	0.300967	0.197207
286.02	0.476374	0.402214	0.300617	0.197111
286.22	0.476652	0.40253	0.300445	0.196901
286.42	0.476643	0.40278	0.301046	0.196703
286.62	0.476692	0.403043	0.300996	0.197229
286.82	0.477029	0.403466	0.300855	0.197584
287.02	0.477455	0.403421	0.301059	0.197423
287.22	0.477509	0.40363	0.301052	0.19752
287.42	0.477536	0.403493	0.301331	0.197733
287.62	0.477835	0.403263	0.300986	0.197725
287.82	0.477916	0.403247	0.300692	0.19786
288.02	0.477619	0.403212	0.300687	0.197373
288.22	0.477441	0.403721	0.300169	0.198632
288.42	0.477983	0.403393	0.300258	0.199675
288.62	0.478422	0.403451	0.300374	0.200344
288.82	0.478893	0.403381	0.300634	0.200688
289.02	0.479052	0.403628	0.3004	0.200552
289.22	0.479352	0.403859	0.300014	0.200628
289.42	0.479579	0.404134	0.300011	0.201201
289.62	0.479674	0.40424	0.30029	0.201151
289.82	0.479806	0.40382	0.299941	0.200892
290.02	0.48021	0.404221	0.299651	0.200719
290.22	0.480464	0.40444	0.300053	0.200295
290.42	0.480699	0.404582	0.300058	0.200067
290.62	0.480758	0.404628	0.300039	0.200036
290.82	0.481028	0.405025	0.30032	0.199446
291.02	0.481141	0.404912	0.300393	0.198766
291.22	0.481021	0.40495	0.300187	0.198557
291.42	0.481325	0.405029	0.300367	0.19824
291.62	0.481511	0.405039	0.300154	0.197326
291.82	0.481341	0.405065	0.300689	0.197041
292.02	0.48155	0.404899	0.300921	0.196711
292.22	0.482	0.404644	0.301363	0.197991
292.42	0.482232	0.404507	0.302098	0.197587
292.62	0.482304	0.404855	0.30256	0.198187
292.82	0.482475	0.404946	0.302466	0.198459
293.02	0.482457	0.405372	0.302098	0.198968
293.22	0.48232	0.405642	0.302309	0.199513
293.42	0.482095	0.406022	0.302725	0.199862
293.62	0.482159	0.405873	0.302536	0.199754
293.82	0.482495	0.406127	0.302092	0.199866
294.02	0.482667	0.406257	0.302148	0.199761
294.22	0.482726	0.406201	0.302071	0.199707
294.42	0.482708	0.4064	0.30197	0.199668
294.62	0.482729	0.406569	0.302147	0.199637
294.82	0.482793	0.406923	0.301922	0.199354
295.02	0.483023	0.406898	0.301621	0.198962
295.22	0.483191	0.406976	0.30141	0.198792
295.42	0.483592	0.407337	0.301511	0.198528
295.62	0.483929	0.407549	0.301703	0.197648
295.82	0.484211	0.407262	0.301604	0.197668
296.02	0.484549	0.407112	0.301481	0.197579
296.22	0.484848	0.40706	0.30177	0.197303
296.42	0.485033	0.407364	0.301767	0.197026
296.62	0.485147	0.407196	0.301658	0.19771
296.82	0.485458	0.407259	0.301145	0.197677
297.02	0.485669	0.407717	0.301031	0.197795
297.22	0.486072	0.407826	0.301432	0.197625
297.42	0.486036	0.407937	0.301936	0.197325
297.62	0.486356	0.407746	0.301588	0.197235
297.82	0.486555	0.407967	0.30176	0.19751
298.02	0.486434	0.407525	0.302006	0.197383
298.22	0.486386	0.407423	0.30226	0.197717
298.42	0.486725	0.407283	0.302721	0.1974
298.62	0.48691	0.407241	0.302862	0.197467
298.82	0.486826	0.407485	0.30285	0.197552
299.02	0.48706	0.407383	0.302776	0.197759
299.22	0.48727	0.407213	0.302871	0.197957
299.42	0.487802	0.407454	0.303093	0.198247
299.62	0.488013	0.40715	0.30324	0.197817
299.82	0.487953	0.406777	0.303164	0.198255
300.02	0.488421	0.406703	0.302975	0.198539
300.22	0.488754	0.406813	0.30302	0.198409
300.42	0.488612	0.407307	0.30305	0.198355
300.62	0.488273	0.40743	0.303136	0.198054
300.82	0.488535	0.407867	0.303126	0.197867
301.02	0.488798	0.408551	0.30346	0.197609
301.22	0.488795	0.408735	0.303718	0.197242
301.42	0.488678	0.409033	0.304121	0.197221
301.62	0.489124	0.409272	0.303873	0.197719
301.82	0.489468	0.409758	0.30397	0.197695
302.02	0.48971	0.409853	0.303747	0.19757
302.22	0.489959	0.409875	0.303636	0.197924
302.42	0.490548	0.410062	0.303167	0.197879
302.62	0.490569	0.410479	0.302992	0.197986
302.82	0.490948	0.410544	0.302635	0.198382
303.02	0.491332	0.410451	0.302466	0.198471
303.22	0.491638	0.410086	0.302444	0.198584
303.42	0.491989	0.410162	0.302788	0.198805
303.62	0.492336	0.40996	0.30292	0.198826
303.82	0.492218	0.409892	0.303026	0.199455
304.02	0.49215	0.409599	0.302853	0.199246
304.22	0.491627	0.409782	0.303256	0.199109
304.42	0.491115	0.409968	0.303722	0.199068
304.62	0.49092	0.409975	0.303932	0.198758
304.82	0.490937	0.409888	0.304241	0.198584
305.02	0.490731	0.41018	0.304806	0.198281
305.22	0.490854	0.409908	0.305098	0.198092
305.42	0.490951	0.410163	0.305539	0.198123
305.62	0.491184	0.410195	0.305272	0.198386
305.82	0.4911	0.410477	0.305193	0.19823
306.02	0.491219	0.410562	0.304612	0.198513
306.22	0.491159	0.410621	0.304533	0.198852
306.42	0.491104	0.410876	0.30409	0.198726
306.62	0.491267	0.411019	0.303952	0.198613
306.82	0.491645	0.411139	0.303464	0.19887
307.02	0.491724	0.411653	0.303432	0.198818
307.22	0.492211	0.411878	0.303063	0.198951
307.42	0.492562	0.412017	0.303241	0.199095
307.62	0.492998	0.412252	0.303288	0.199136
307.82	0.493193	0.412469	0.303251	0.198996
308.02	0.493629	0.412583	0.30303	0.198718
308.22	0.49389	0.412906	0.302872	0.198913
308.42	0.494327	0.413405	0.302919	0.198814
308.62	0.494791	0.413614	0.302862	0.198458
308.82	0.495345	0.413664	0.303411	0.198063
309.02	0.495722	0.413628	0.303078	0.197703
309.22	0.496007	0.413657	0.302983	0.197749
309.42	0.496159	0.413718	0.303261	0.198147
309.62	0.496381	0.413859	0.303155	0.198554
309.82	0.496409	0.414042	0.303425	0.198547
310.02	0.496631	0.413835	0.303471	0.198623
310.22	0.496625	0.413545	0.304151	0.198733
310.42	0.4967	0.413545	0.304155	0.198939
310.62	0.496995	0.413974	0.304273	0.199009
310.82	0.496829	0.414267	0.30446	0.198925
311.02	0.49675	0.414809	0.304737	0.199107
311.22	0.4967	0.414684	0.304886	0.198943
311.42	0.496586	0.414708	0.305183	0.198793
311.62	0.49678	0.415112	0.305216	0.198531
311.82	0.49694	0.415072	0.305018	0.198432
312.02	0.496903	0.415003	0.304791	0.19861
312.22	0.496613	0.414985	0.304529	0.198411
312.42	0.496696	0.414956	0.304359	0.19806
312.62	0.496771	0.414444	0.303976	0.197655
312.82	0.49688	0.41445	0.303769	0.196977
313.02	0.496887	0.414068	0.303301	0.19658
313.22	0.496562	0.414223	0.303772	0.196518
313.42	0.497054	0.414484	0.304453	0.19662
313.62	0.497538	0.414763	0.304779	0.196636
313.82	0.498107	0.414428	0.305337	0.196698
314.02	0.498351	0.414078	0.305905	0.196741
314.22	0.499006	0.41443	0.306714	0.196875
314.42	0.499236	0.41486	0.30706	0.197137
314.62	0.499467	0.415147	0.307365	0.197201
314.82	0.499441	0.415242	0.30768	0.197337
315.02	0.499775	0.415712	0.307459	0.197602
315.22	0.499897	0.415405	0.307389	0.197639
315.42	0.500088	0.415693	0.307375	0.197682
315.62	0.500264	0.416025	0.307087	0.19802
315.82	0.500447	0.416123	0.30696	0.198183
316.02	0.500375	0.416037	0.306623	0.19845
316.22	0.500202	0.415824	0.306342	0.198166
316.42	0.50015	0.415697	0.30581	0.197869
316.62	0.499956	0.416067	0.305059	0.19762
316.82	0.499839	0.416293	0.304697	0.197297
317.02	0.499617	0.416125	0.304877	0.197158
317.22	0.499605	0.416451	0.305271	0.197193
317.42	0.499896	0.416524	0.305919	0.197419
317.62	0.499843	0.416453	0.305736	0.197828
317.82	0.500195	0.416193	0.305711	0.198063
318.02	0.500268	0.416422	0.305998	0.197705
318.22	0.500842	0.416634	0.305882	0.197815
318.42	0.500815	0.416546	0.305689	0.197772
318.62	0.501194	0.41635	0.305489	0.19759
318.82	0.501496	0.416052	0.305493	0.197407
319.02	0.50205	0.416142	0.305168	0.19516
319.22	0.502411	0.416092	0.304852	0.196426
319.42	0.502763	0.416455	0.304851	0.197588
319.62	0.502941	0.416543	0.304856	0.198793
319.82	0.503219	0.416437	0.304943	0.199288
320.02	0.502963	0.416169	0.304814	0.199873
320.22	0.502973	0.416112	0.304994	0.200131
320.42	0.503099	0.416493	0.304769	0.200509
320.62	0.50305	0.416712	0.305004	0.201005
320.82	0.503032	0.41639	0.305061	0.201355
321.02	0.502657	0.416326	0.305473	0.201358
321.22	0.502643	0.41661	0.305584	0.20175
321.42	0.502535	0.416704	0.305627	0.202013
321.62	0.502387	0.417079	0.305285	0.202088
321.82	0.502631	0.417539	0.305579	0.201959
322.02	0.502539	0.41802	0.305494	0.201161
322.22	0.503027	0.418162	0.305591	0.200849
322.42	0.503473	0.418415	0.305806	0.199721
322.62	0.503959	0.418259	0.30593	0.198714
322.82	0.504887	0.418513	0.305925	0.197838
323.02	0.505409	0.418819	0.305941	0.196812
323.22	0.505733	0.418929	0.306118	0.199274
323.42	0.505854	0.419431	0.306267	0.199022
323.62	0.505951	0.419712	0.306637	0.19886
323.82	0.506305	0.419929	0.306676	0.19856
324.02	0.506391	0.420133	0.307053	0.198092
324.22	0.506655	0.420399	0.307376	0.197905
324.42	0.507001	0.420694	0.307631	0.198058
324.62	0.50686	0.421153	0.307961	0.198186
324.82	0.506912	0.421353	0.307809	0.198282
325.02	0.506497	0.421364	0.307906	0.198193
325.22	0.50652	0.421923	0.30804	0.198263
325.42	0.506381	0.421972	0.307908	0.198179
325.62	0.50631	0.422207	0.307948	0.198292
325.82	0.506388	0.422229	0.308126	0.198523
326.02	0.506571	0.422191	0.307712	0.198312
326.22	0.506864	0.421759	0.307621	0.198246
326.42	0.506877	0.42156	0.30737	0.198065
326.62	0.506863	0.421407	0.306993	0.198088
326.82	0.507144	0.421178	0.307061	0.198124
327.02	0.50678	0.420567	0.307049	0.198224
327.22	0.506814	0.420675	0.307053	0.19804
327.42	0.507092	0.42122	0.30674	0.197644
327.62	0.507296	0.421324	0.306962	0.197791
327.82	0.507715	0.421104	0.306774	0.197675
328.02	0.507994	0.421339	0.306914	0.197149
328.22	0.508225	0.42149	0.306957	0.197408
328.42	0.508521	0.42171	0.307501	0.197561
328.62	0.508624	0.422236	0.307665	0.197551
328.82	0.508695	0.422415	0.308342	0.197335
329.02	0.508984	0.42253	0.308478	0.196943
329.22	0.509433	0.422826	0.308771	0.196906
329.42	0.509897	0.422826	0.308615	0.197266
329.62	0.510206	0.422911	0.308704	0.197412
329.82	0.510325	0.422469	0.308931	0.197958
330.02	0.510608	0.4225	0.308475	0.198131
330.22	0.510745	0.421793	0.308407	0.198544
330.42	0.510524	0.42171	0.308741	0.198716
330.62	0.510606	0.421816	0.30896	0.199274
330.82	0.510905	0.421392	0.309194	0.19953
331.02	0.511025	0.421242	0.309105	0.199818
331.22	0.511029	0.421469	0.309396	0.199808
331.42	0.511131	0.421913	0.309397	0.19979
331.62	0.510798	0.421685	0.309007	0.199702
331.82	0.510721	0.421749	0.308881	0.199139
332.02	0.510607	0.422221	0.308942	0.198897
332.22	0.510401	0.422388	0.308721	0.198802
332.42	0.510444	0.422826	0.308871	0.198164
332.62	0.5104	0.42329	0.308608	0.197516
332.82	0.510431	0.423872	0.308813	0.196952
333.02	0.511035	0.424078	0.308216	0.19689
333.22	0.511443	0.424336	0.308289	0.197039
333.42	0.511517	0.424797	0.308272	0.197474
333.62	0.511507	0.424468	0.308449	0.197649
333.82	0.511565	0.424347	0.308907	0.197928
334.02	0.511911	0.42437	0.308662	0.197757
334.22	0.512183	0.423801	0.309058	0.197972
334.42	0.512442	0.424006	0.309342	0.197998
334.62	0.513001	0.424046	0.309632	0.198613
334.82	0.513295	0.423962	0.309484	0.198466
335.02	0.51309	0.423899	0.309508	0.198652
335.22	0.512922	0.42392	0.309569	0.198333
335.42	0.513165	0.424063	0.309448	0.19812
335.62	0.51334	0.423629	0.309264	0.197793
335.82	0.513648	0.423915	0.309576	0.197545
336.02	0.513968	0.423664	0.309062	0.197621
336.22	0.514481	0.423863	0.308709	0.197318
336.42	0.514486	0.424194	0.308932	0.197249
336.62	0.514721	0.424146	0.308553	0.197335
336.82	0.515134	0.42408	0.308667	0.197321
337.02	0.515396	0.424112	0.308604	0.197451
337.22	0.51546	0.424247	0.308966	0.197375
337.42	0.515433	0.424441	0.308989	0.19758
337.62	0.515518	0.424476	0.309091	0.197732
337.82	0.515491	0.424718	0.30901	0.197758
338.02	0.515576	0.424765	0.30888	0.19797
338.22	0.515717	0.42473	0.309356	0.198495
338.42	0.51586	0.42515	0.309377	0.198819
338.62	0.515595	0.425162	0.309507	0.199349
338.82	0.515221	0.425595	0.30923	0.199185
339.02	0.51525	0.425769	0.309531	0.199086
339.22	0.515506	0.426142	0.309616	0.19864
339.42	0.515655	0.426576	0.309662	0.198795
339.62	0.515792	0.426774	0.309923	0.198567
339.82	0.516019	0.42697	0.309889	0.198554
340.02	0.516352	0.427014	0.309438	0.198252
340.22	0.516656	0.427343	0.309732	0.198297
340.42	0.516649	0.427228	0.309538	0.198336
340.62	0.517074	0.427049	0.309118	0.197816
340.82	0.517268	0.42669	0.309382	0.197453
341.02	0.517462	0.426745	0.309254	0.197145
341.22	0.517592	0.426762	0.309221	0.197034
341.42	0.518015	0.426868	0.309031	0.197343
341.62	0.517979	0.426705	0.309374	0.197612
341.82	0.518108	0.426702	0.309543	0.197838
342.02	0.518212	0.426669	0.309696	0.198115
342.22	0.518102	0.42665	0.310015	0.198316
342.42	0.518157	0.426651	0.30995	0.198432
342.62	0.518003	0.42656	0.310118	0.198421
342.82	0.518132	0.426924	0.310263	0.198047
343.02	0.518314	0.427226	0.310323	0.197756
343.22	0.518384	0.427223	0.31026	0.19758
343.42	0.518723	0.427288	0.310181	0.197603
343.62	0.519143	0.427051	0.310328	0.1972
343.82	0.519812	0.426684	0.310232	0.197301
344.02	0.520382	0.426651	0.310013	0.197137
344.22	0.5206	0.426584	0.309937	0.197251
344.42	0.521053	0.426304	0.309653	0.197306
344.62	0.521116	0.426202	0.30976	0.197058
344.82	0.521329	0.425776	0.310211	0.197422
345.02	0.521644	0.425642	0.309938	0.197522
345.22	0.52184	0.425786	0.309768	0.197541
345.42	0.522148	0.425655	0.3101	0.197685
345.62	0.521809	0.425921	0.310255	0.197896
345.82	0.521638	0.426229	0.309898	0.198032
346.02	0.52166	0.426373	0.309748	0.198018
346.22	0.521039	0.426713	0.309663	0.198017
346.42	0.520964	0.427022	0.309504	0.198042
346.62	0.520507	0.427641	0.309599	0.197863
346.82	0.520229	0.427991	0.309347	0.197841
347.02	0.519971	0.428416	0.309419	0.197699
347.22	0.519827	0.428628	0.309974	0.197821
347.42	0.520011	0.429084	0.310171	0.197591
347.62	0.520113	0.428855	0.310532	0.197476
347.82	0.520457	0.428651	0.310767	0.19738
348.02	0.520601	0.428945	0.310612	0.197131
348.22	0.520484	0.429278	0.31086	0.196985
348.42	0.520916	0.429162	0.31131	0.197379
348.62	0.521398	0.429223	0.311539	0.197372
348.82	0.521613	0.428946	0.311727	0.197703
349.02	0.521922	0.42933	0.311697	0.1977
349.22	0.522411	0.429773	0.311984	0.197625
349.42	0.522913	0.429536	0.312391	0.197901
349.62	0.523038	0.429991	0.312211	0.198303
349.82	0.523236	0.429888	0.312258	0.198584
350.02	0.523597	0.430174	0.312201	0.198631
350.22	0.523279	0.430344	0.311795	0.198823
350.42	0.523499	0.430402	0.311714	0.19871
350.62	0.523336	0.4306	0.31176	0.198728
350.82	0.523503	0.430446	0.311764	0.198685
351.02	0.523535	0.430716	0.311962	0.198335
351.22	0.523999	0.430575	0.312036	0.198345
351.42	0.524487	0.430171	0.311504	0.198064
351.62	0.524691	0.429727	0.311313	0.198057
351.82	0.525017	0.429711	0.311068	0.19791
352.02	0.525172	0.430135	0.310828	0.198185
352.22	0.52546	0.430335	0.311056	0.198687
352.42	0.525963	0.429909	0.310982	0.199018
352.62	0.525935	0.429803	0.310785	0.198835
352.82	0.52567	0.429851	0.311023	0.198961
353.02	0.525968	0.430534	0.311086	0.199016
353.22	0.526763	0.430484	0.311233	0.199034
353.42	0.527007	0.430339	0.311177	0.199152
353.62	0.526783	0.430924	0.311483	0.199209
353.82	0.526407	0.431148	0.311657	0.199131
354.02	0.526307	0.431558	0.31145	0.198893
354.22	0.52601	0.431726	0.311426	0.198733
354.42	0.526291	0.432121	0.311651	0.198159
354.62	0.526119	0.432564	0.311917	0.197979
354.82	0.526232	0.432729	0.311844	0.197648
355.02	0.526185	0.433193	0.311627	0.19741
355.22	0.526473	0.433207	0.311804	0.197667
355.42	0.526438	0.433237	0.31177	0.19745
355.62	0.52628	0.433589	0.312057	0.197235
355.82	0.526453	0.433612	0.312441	0.197252
356.02	0.52685	0.433211	0.312595	0.197494
356.22	0.527095	0.432877	0.312694	0.197358
356.42	0.52736	0.43234	0.312561	0.196874
356.62	0.527199	0.432229	0.312447	0.196523
356.82	0.527766	0.432244	0.312493	0.196327
357.02	0.528282	0.431955	0.312332	0.196081
357.22	0.528594	0.431544	0.312266	0.196
357.42	0.528683	0.431332	0.311993	0.196256
357.62	0.528843	0.431255	0.311988	0.196119
357.82	0.528871	0.431243	0.3119	0.196101
358.02	0.52914	0.431399	0.311831	0.196146
358.22	0.529488	0.431721	0.311871	0.196073
358.42	0.529955	0.432236	0.311951	0.196031
358.62	0.530015	0.432582	0.31189	0.196341
358.82	0.530295	0.432995	0.311706	0.19656
359.02	0.530484	0.433557	0.311762	0.196774
359.22	0.530891	0.433934	0.312006	0.197005
359.42	0.531192	0.434354	0.312128	0.196909
359.62	0.531353	0.434747	0.312181	0.197003
359.82	0.531794	0.434903	0.312297	0.197307
360.04	0.536742	0.435899	0.311489	0.196843
360.24	0.535518	0.435393	0.310919	0.196476
360.44	0.534541	0.434885	0.310743	0.195498
360.64	0.533778	0.434383	0.310477	0.194601
360.84	0.532752	0.433667	0.310461	0.193847
361.04	0.531542	0.433378	0.310399	0.193422
361.24	0.530463	0.432939	0.309957	0.192638
361.44	0.529507	0.432463	0.309655	0.191843
361.64	0.528502	0.431908	0.309493	0.19121
361.84	0.527831	0.431577	0.309285	0.190706
362.04	0.527323	0.431142	0.308829	0.190244
362.24	0.527088	0.430693	0.308321	0.18993
362.44	0.526696	0.430289	0.307676	0.189893
362.64	0.526457	0.429939	0.307405	0.18939
362.84	0.526153	0.429314	0.306691	0.189511
363.04	0.525866	0.42918	0.30598	0.189288
363.24	0.525565	0.429001	0.305581	0.189102
363.44	0.52549	0.428872	0.305104	0.188648
363.64	0.525005	0.427942	0.304473	0.188507
363.84	0.524852	0.427434	0.303993	0.188603
364.04	0.524266	0.427082	0.303531	0.188336
364.24	0.524171	0.426601	0.302547	0.188738
364.44	0.524136	0.426211	0.302595	0.188579
364.64	0.52419	0.426111	0.302284	0.188795
364.84	0.523792	0.425852	0.302227	0.189227
365.04	0.523278	0.425992	0.302206	0.18936
365.24	0.522923	0.426044	0.301938	0.189038
365.44	0.522611	0.425759	0.301992	0.1889
365.64	0.522142	0.425615	0.302082	0.18894
365.84	0.521859	0.425845	0.3017	0.189206
366.04	0.521194	0.425577	0.301422	0.189399
366.24	0.520703	0.425145	0.301539	0.189642
366.44	0.520412	0.425109	0.301555	0.189579
366.64	0.520088	0.424937	0.301743	0.189287
366.84	0.51965	0.424831	0.301704	0.189358
367.04	0.519571	0.424822	0.301612	0.188975
367.24	0.519872	0.424953	0.301897	0.188926
367.44	0.519855	0.424637	0.301924	0.188473
367.64	0.51966	0.424457	0.301563	0.188292
367.84	0.519706	0.424404	0.301333	0.188597
368.04	0.519536	0.424476	0.301179	0.188751
368.24	0.51955	0.424383	0.300989	0.189199
368.44	0.519405	0.424666	0.301215	0.189344
368.64	0.519553	0.42484	0.301122	0.189309
368.84	0.519875	0.424887	0.301232	0.189534
369.04	0.519907	0.425178	0.301565	0.189379
369.24	0.520321	0.425322	0.301429	0.189757
369.44	0.520646	0.425024	0.301435	0.189719
369.64	0.520809	0.424725	0.301559	0.190234
369.84	0.520495	0.424384	0.301299	0.190898
370.04	0.520261	0.424146	0.301653	0.191454
370.24	0.520153	0.423684	0.301936	0.19157
370.44	0.519904	0.42381	0.301807	0.191243
370.64	0.519447	0.423551	0.301744	0.191357
370.84	0.519488	0.422941	0.301945	0.191245
371.04	0.519565	0.422505	0.302024	0.19085
371.24	0.520062	0.422766	0.302462	0.191057
371.44	0.519676	0.422456	0.302181	0.190986
371.64	0.51969	0.422474	0.301824	0.190803
371.84	0.51971	0.422395	0.301554	0.191274
372.04	0.519661	0.42246	0.301759	0.191435
372.24	0.519224	0.422673	0.301896	0.191604
372.44	0.519189	0.423199	0.301613	0.191474
372.64	0.51964	0.423341	0.301897	0.191985
372.84	0.520166	0.42413	0.301832	0.192175
373.04	0.52037	0.424501	0.30179	0.192226
373.24	0.520662	0.424573	0.301506	0.192503
373.44	0.520786	0.424548	0.301452	0.192621
373.64	0.520997	0.424966	0.301246	0.193061
373.84	0.520729	0.425136	0.300823	0.193201
374.04	0.520704	0.425563	0.30124	0.19326
374.24	0.520083	0.42535	0.300957	0.193032
374.44	0.519665	0.425317	0.3008	0.192997
374.64	0.519466	0.424991	0.300706	0.192926
374.84	0.519584	0.424737	0.300978	0.193033
375.04	0.519602	0.42455	0.301201	0.192716
375.24	0.52002	0.42423	0.301448	0.192781
375.44	0.51962	0.42369	0.301497	0.192598
375.64	0.519804	0.423225	0.301582	0.192787
375.84	0.519644	0.422811	0.301595	0.193478
376.04	0.519663	0.422463	0.302005	0.193809
376.24	0.518933	0.422138	0.301872	0.193991
376.44	0.518676	0.422283	0.301665	0.194333
376.64	0.518597	0.422174	0.301859	0.194726
376.84	0.518402	0.422363	0.301328	0.194497
377.04	0.518514	0.421945	0.301271	0.19435
377.24	0.518415	0.422166	0.301185	0.194667
377.44	0.518478	0.422665	0.301519	0.1949
377.64	0.518905	0.422952	0.301451	0.194822
377.84	0.519146	0.422864	0.301503	0.194966
378.04	0.519311	0.423394	0.301781	0.195305
378.24	0.519436	0.423715	0.301619	0.195364
378.44	0.520056	0.423991	0.302085	0.195497
378.64	0.520571	0.424385	0.302102	0.195509
378.84	0.52073	0.424311	0.302462	0.195729
379.04	0.52105	0.424065	0.302609	0.195301
379.24	0.521575	0.423959	0.302596	0.195696
379.44	0.521737	0.423822	0.303004	0.195934
379.64	0.521963	0.423662	0.303	0.196761
379.84	0.522129	0.423731	0.303205	0.197066
380.04	0.522048	0.423559	0.302986	0.197336
380.24	0.521526	0.423443	0.302842	0.197083
380.44	0.521221	0.423529	0.30258	0.197134
380.64	0.520777	0.423178	0.302421	0.197504
380.84	0.520733	0.423252	0.302332	0.19728
381.04	0.520464	0.423251	0.302465	0.197254
381.24	0.520019	0.423633	0.302745	0.197479
381.44	0.519861	0.423791	0.302864	0.197257
381.64	0.520281	0.423516	0.302679	0.197959
381.84	0.520541	0.423613	0.302638	0.198073
382.04	0.520407	0.42388	0.302781	0.198376
382.24	0.520466	0.423681	0.303043	0.198265
382.44	0.520475	0.423594	0.303208	0.198375
382.64	0.520164	0.423665	0.302901	0.198574
382.84	0.519959	0.42335	0.30313	0.198601
383.04	0.519956	0.423695	0.303147	0.198504
383.24	0.519853	0.423983	0.303279	0.198917
383.44	0.519924	0.423953	0.303635	0.198733
383.64	0.52007	0.423954	0.303463	0.198864
383.84	0.519834	0.42393	0.303571	0.198586
384.04	0.519787	0.423647	0.303468	0.198488
384.24	0.51996	0.423813	0.303638	0.198146
384.44	0.520222	0.424224	0.303447	0.198333
384.64	0.520453	0.424273	0.303421	0.198452
384.84	0.520832	0.42481	0.303543	0.197843
385.04	0.520729	0.424983	0.303611	0.197809
385.24	0.520902	0.425207	0.303617	0.197997
385.44	0.521281	0.425445	0.303616	0.198043
385.64	0.52196	0.425387	0.303791	0.198889
385.84	0.52196	0.425526	0.303556	0.198502
386.04	0.521991	0.425656	0.303893	0.198931
386.24	0.522037	0.425698	0.304232	0.198793
386.44	0.521885	0.425849	0.304697	0.199059
386.64	0.52154	0.425827	0.304979	0.19941
386.84	0.521436	0.42588	0.305337	0.199372
387.04	0.521078	0.42615	0.305657	0.199456
387.24	0.52072	0.425738	0.305988	0.199411
387.44	0.520808	0.425566	0.305811	0.199185
387.64	0.520662	0.425636	0.305664	0.199311
387.84	0.520403	0.42544	0.305691	0.199423
388.04	0.520736	0.425473	0.305519	0.199265
388.24	0.520785	0.42567	0.305557	0.199416
388.44	0.520914	0.425784	0.305424	0.199266
388.64	0.520887	0.425509	0.305246	0.1993
388.84	0.520768	0.425624	0.305085	0.199596
389.04	0.520559	0.425641	0.3051	0.199878
389.24	0.520725	0.425592	0.304803	0.199815
389.44	0.520948	0.425662	0.304838	0.199883
389.64	0.521061	0.425807	0.304448	0.200612
389.84	0.521038	0.425889	0.303996	0.200538
390.04	0.521247	0.425832	0.304255	0.200746
390.24	0.521114	0.425993	0.304717	0.200957
390.44	0.521176	0.425734	0.304939	0.201264
390.64	0.520853	0.42584	0.305144	0.20139
390.84	0.521328	0.425788	0.305316	0.201251
391.04	0.521318	0.425965	0.305509	0.201702
391.24	0.52107	0.426092	0.305819	0.201553
391.44	0.521342	0.426708	0.30546	0.201863
391.64	0.52161	0.426633	0.30555	0.20206
391.84	0.521434	0.426511	0.30568	0.201983
392.04	0.521624	0.426641	0.305909	0.201709
392.24	0.521646	0.426372	0.306201	0.201667
392.44	0.522124	0.426154	0.305962	0.201431
392.64	0.522287	0.426217	0.306255	0.201613
392.84	0.522536	0.426628	0.306396	0.201413
393.04	0.522568	0.42699	0.306691	0.201003
393.24	0.522855	0.426919	0.30663	0.200513
393.44	0.523086	0.427492	0.306701	0.200915
393.64	0.523222	0.427748	0.306541	0.200909
393.84	0.523415	0.427827	0.306485	0.200602
394.04	0.523411	0.428038	0.306425	0.200631
394.24	0.52344	0.428381	0.306458	0.200869
394.44	0.523596	0.428418	0.306458	0.200512
394.64	0.523399	0.428471	0.306317	0.200272
394.84	0.523725	0.428114	0.306185	0.200582
395.04	0.523293	0.428066	0.3063	0.200888
395.24	0.522914	0.428011	0.306262	0.200759
395.44	0.523149	0.428206	0.305877	0.201283
395.64	0.522917	0.427663	0.305795	0.201492
395.84	0.522482	0.427478	0.306258	0.201552
396.04	0.522846	0.427141	0.306554	0.201772
396.24	0.522897	0.42681	0.30674	0.201978
396.44	0.522938	0.42683	0.306906	0.202232
396.64	0.522725	0.427247	0.30722	0.202346
396.84	0.522768	0.427414	0.307166	0.202103
397.04	0.523001	0.427353	0.307087	0.20224
397.24	0.523175	0.427381	0.307209	0.201992
397.44	0.523328	0.427882	0.307211	0.201864
397.64	0.523258	0.427822	0.307277	0.201711
397.84	0.523521	0.428013	0.306959	0.201705
398.04	0.523538	0.428074	0.306765	0.201565
398.24	0.52381	0.428146	0.30707	0.201183
398.44	0.523964	0.427932	0.307311	0.200877
398.64	0.524037	0.42752	0.306563	0.200732
398.84	0.524305	0.427418	0.306596	0.201107
399.04	0.524312	0.427468	0.30675	0.201131
399.24	0.524315	0.427668	0.30664	0.201099
399.44	0.524323	0.427943	0.306944	0.201302
[truncated: 1,602 more rows]
