# Supplementary material for: Nicotinamide mononucleotide adenylyltransferase uses its NAD+ substrate-binding site to chaperone phosphorylated Tau
Source: eLife. 2020 Apr 6;9:e51859. doi: 10.7554/eLife.51859 (PMC7136026; doi:10.7554/eLife.51859)
Supplement: Figure 3—source data 4. [file elife-51859-fig3-data4.xlsx]

## Sheet: Fig.3D
Fig. 3D	The presence of NMN (top) or ATP (bottom) reduces the inhibitory effect of mN3 against pK19 amyloid aggregation
	pK19 100μM				pK19:mN3 10:1				pK19:NMN=1:10				pK19:NMN=1:20				pK19:NMN=1:40
Time (h)	# Repeat 1	# Repeat 2	# Repeat3	Average	# Repeat 1	# Repeat 2	# Repeat3	Average	# Repeat 1	# Repeat 2	# Repeat3	Average	# Repeat 1	# Repeat 2	# Repeat3	Average	# Repeat 1	# Repeat 2	# Repeat3	Average
0	2.33533	2.29313	2.42096	2.34981	2.55715	2.78455	2.70305	2.68158	2.48198	2.69621	2.43928	2.53916	2.87561	2.9001	2.43205	2.73592	2.7927	2.89713	2.35874	2.68286
6	11.2188	11.065	11.0888	11.1242	4.9119	4.27428	3.74029	4.30882	5.95579	5.75704	5.7768	5.82988	8.05846	7.81384	7.86347	7.91192	10.7856	10.9555	10.4601	10.7337
12	23.1785	22.7052	23.0123	22.9653	6.23463	4.90112	4.38904	5.17493	4.94047	4.19864	8.48102	5.87338	12.4454	11.8577	11.9542	12.0858	18.0181	17.6393	17.1709	17.6094
18	34.7964	33.8532	34.6016	34.4171	6.97025	5.88113	5.18412	6.01183	5.52671	4.27087	7.20509	5.66756	14.3045	14.1063	15.7003	14.7037	23.5908	23.2666	22.5842	23.1472
24	45.4365	43.6966	44.9434	44.6922	7.54635	6.45279	5.55623	6.51846	5.78987	4.34894	7.56525	5.90135	10.1433	18.3441	14.3324	14.2733	27.7369	27.5554	26.7965	27.3629
30	54.8667	53.4109	55.4885	54.5887	7.76725	6.83891	5.84414	6.81677	6.15333	4.33076	8.39053	6.29154	9.75341	19.7329	15.2498	14.912	38.0759	38.2996	43.1467	39.8407
36	63.2893	62.5647	66.3796	64.0779	7.93832	7.38436	6.17307	7.16525	6.35657	4.32237	8.38031	6.35308	15.4353	20.673	16.3401	17.4828	40.678	42.9872	46.9484	43.5379
42	73.0658	70.3796	74.7809	72.7421	8.38759	7.89469	6.3843	7.55553	11.5155	4.7824	8.44654	8.24815	15.8059	20.1136	17.1423	17.6873	43.0117	46.1252	50.5037	46.5469
48	79.2068	76.2064	80.4458	78.6197	8.54293	8.04585	6.45621	7.68166	8.45095	4.75123	8.67736	7.29318	16.2586	21.1243	18.3922	18.5917	45.6431	48.9263	52.3389	48.9694
54	82.6449	78.5237	83.6588	81.6091	8.77792	8.35175	6.64599	7.92522	8.68097	5.04451	8.82647	7.51732	16.4167	21.5937	19.4276	19.146	47.4471	52.1125	55.4874	51.6823
60	86.6291	81.1321	87.7557	85.1723	8.74925	8.72352	6.89633	8.12303	9.15492	5.03332	8.87596	7.68807	17.4426	22.6159	20.4637	20.1741	49.2538	55.1469	57.7989	54.0665
	pK19 100μM				pK19:mN3 10:1				pK19:ATP=1:10				pK19:ATP=1:20				pK19:ATP=1:40
Time (h)	# Repeat 1	# Repeat 2	# Repeat3	Average	# Repeat 1	# Repeat 2	# Repeat3	Average	# Repeat 1	# Repeat 2	# Repeat3	Average	# Repeat 1	# Repeat 2	# Repeat3	Average	# Repeat 1	# Repeat 2	# Repeat3	Average
0	2.33533	2.29313	2.42096	2.34981	2.55715	2.78455	2.70305	2.68158	2.51774	2.65975	2.64189	2.60646	3.1209	2.89809	2.90181	2.9736	3.31502	3.54404	3.38627	3.41511
6	11.2188	11.065	11.0888	11.1242	4.9119	4.27428	3.74029	4.30882	5.96757	5.94328	5.96163	5.95749	9.04283	9.1888	8.92479	9.05214	7.76238	8.07821	6.98761	7.6094
12	23.1785	22.7052	23.0123	22.9653	6.23463	4.90112	4.38904	5.17493	9.08461	9.20466	8.92061	9.06996	15.3423	15.1676	14.9075	15.1391	13.7315	13.8757	12.4404	13.3492
18	34.7964	33.8532	34.6016	34.4171	6.97025	5.88113	5.18412	6.01183	7.74436	8.26363	7.28932	7.76577	20.1999	20.1589	19.4377	19.9322	18.9074	19.4856	17.0535	18.4822
24	45.4365	43.6966	44.9434	44.6922	7.54635	6.45279	5.55623	6.51846	8.06292	9.27498	8.18169	8.50653	26.4647	26.871	26.3833	26.573	28.8887	25.4648	21.334	25.2292
30	54.8667	53.4109	55.4885	54.5887	7.76725	6.83891	5.84414	6.81677	8.90868	10.2445	8.99818	9.38379	29.3662	28.6896	28.5044	28.8534	35.0519	37.6287	31.0775	34.586
36	63.2893	62.5647	66.3796	64.0779	7.93832	7.38436	6.17307	7.16525	9.2681	11.1655	9.8686	10.1007	32.1252	31.365	30.8904	31.4602	39.9426	43.3199	36.8235	40.0287
42	73.0658	70.3796	74.7809	72.7421	8.38759	7.89469	6.3843	7.55553	9.2557	11.4681	10.5115	10.4118	33.8854	32.8186	32.7551	33.153	43.5987	47.9942	40.8698	44.1542
48	79.2068	76.2064	80.4458	78.6197	8.54293	8.04585	6.45621	7.68166	9.27712	12.0397	11.2024	10.8397	35.7163	34.3696	35.0168	35.0342	46.6224	51.6375	43.5723	47.2774
54	82.6449	78.5237	83.6588	81.6091	8.77792	8.35175	6.64599	7.92522	9.15342	12.5986	11.7902	11.1807	37.1701	36.409	36.7133	36.7641	48.9063	54.7441	46.4153	50.0219
60	86.6291	81.1321	87.7557	85.1723	8.74925	8.72352	6.89633	8.12303	9.33967	12.5988	12.1162	11.3516	39.3494	38.3379	38.6472	38.7782	51.0476	57.5403	48.5924	52.3934
