# Supplementary material for: Nicotinamide mononucleotide adenylyltransferase uses its NAD+ substrate-binding site to chaperone phosphorylated Tau
Source: eLife. 2020 Apr 6;9:e51859. doi: 10.7554/eLife.51859 (PMC7136026; doi:10.7554/eLife.51859)
Supplement: Figure 3—source data 5. [file elife-51859-fig3-data5.xlsx]

## Sheet: Fig.3E
Fig. 3E	The presence of pK19 shows no significant influence on the enzyme activity of mN3
25uM NMN				NMN:pK19=1:10				NMN:BSA=1:10
# Repeat 1	# Repeat 2	# Repeat3	Average	# Repeat 1	# Repeat 2	# Repeat3	Average	# Repeat 1	# Repeat 2	# Repeat3	Average
4.46588	3.72157	3.34941	3.84562	4.46588	3.34941	3.34941	3.72157	4.09372	3.34941	3.72157	3.72157
