# Supplementary material for: Nicotinamide mononucleotide adenylyltransferase uses its NAD+ substrate-binding site to chaperone phosphorylated Tau
Source: eLife. 2020 Apr 6;9:e51859. doi: 10.7554/eLife.51859 (PMC7136026; doi:10.7554/eLife.51859)
Supplement: Figure 6—source data 1. [file elife-51859-fig6-data1.xlsx]

## Sheet: Fig.6B
Fig. 6B	The average number of fluorescent counts per imaging area detected by SMPull
	pTau23-647	4nm mN3+pTau	20nm mN3+pTau	Hsp90+pTau+no mN3	Hsp90+pTau+800pm mN3	Hsp90+pTau+4nm mN3	Hsp90+pTau+20nm mN3
# Repeat 1	25	21	24	21	33	55	64
# Repeat 2	23	25	22	20	38	49	57
# Repeat 3	17	26	25	19	31	46	56
# Repeat 4	17	17	26	16	35	51	54
# Repeat 5	22	22	21	20	26	45	53
# Repeat 6	24	23	22	28	42	54	63
# Repeat 7	16	24	24	17	21	64	66
# Repeat 8	23	18	22	26	20	53	56
# Repeat 9	19	26	26	24	28	43	51
# Repeat 10	21	21	19	25	23	56	55
Average	20.7	22.3	23.1	21.6	29.7	51.6	57.5

## Sheet: Figure 6—figure supplement 1
Figure 6—figure supplement 1	The average number of fluorescent counts per imaging area detected by SMPull
	Tau23-647	4nm mN3+Tau23	20nm mN3+Tau23	Hsp90+Tau23+no mN3	Hsp90+Tau23+800pm mN3	Hsp90+Tau23+4nm mN3	Hsp90+Tau23+20nm mN3
# Repeat 1	24	25	19	21	24	20	26
# Repeat 2	20	24	26	24	24	25	25
# Repeat 3	18	23	28	17	25	24	18
# Repeat 4	15	22	27	16	24	19	17
# Repeat 5	20	17	26	18	20	20	20
# Repeat 6	17	17	17	14	18	25	17
# Repeat 7	20	24	25	19	26	17	19
# Repeat 8	20	25	18	21	18	31	23
# Repeat 9	21	24	26	21	23	19	16
# Repeat 10	21	21	24	20	24	23	19
Average	19.6	22.2	23.6	19.1	22.6	22.3	20
