# Supplementary material for: Nicotinamide mononucleotide adenylyltransferase uses its NAD+ substrate-binding site to chaperone phosphorylated Tau
Source: eLife. 2020 Apr 6;9:e51859. doi: 10.7554/eLife.51859 (PMC7136026; doi:10.7554/eLife.51859)
Supplement: Figure 6—source data 2. [file elife-51859-fig6-data2.xlsx]

## Sheet: Fig.6C
Fig. 6C	BLI measurements of mN3 binding to the SA sensor chip coated with biotinylated Hsp90
	Binding affinity of mN3 with Hsp90
	Time(s)	100uM	50uM	25uM	12.5uM
	0	0.05825	0.05037	0.03564	0.017689
	0.2	0.068309	0.056668	0.040864	0.020466
	0.4	0.078878	0.063277	0.04702	0.024158
	0.6	0.089465	0.069791	0.052573	0.027532
	0.8	0.10013	0.076191	0.058223	0.031055
	1	0.109911	0.082057	0.063636	0.033964
	1.2	0.118614	0.087691	0.068407	0.03718
	1.4	0.126381	0.092491	0.072289	0.039929
	1.6	0.132394	0.096423	0.075239	0.042029
	1.8	0.13595	0.098715	0.076786	0.043229
	2	0.13805	0.1003	0.078109	0.044719
	2.2	0.137091	0.099689	0.077417	0.044815
	2.4	0.137847	0.100399	0.077741	0.045517
	2.6	0.139041	0.101212	0.077843	0.046136
	2.8	0.140545	0.101986	0.077995	0.047114
	3	0.14209	0.102972	0.078611	0.047763
	3.2	0.142775	0.103198	0.078804	0.048398
	3.4	0.144244	0.104581	0.079711	0.049599
	3.6	0.145119	0.105097	0.079697	0.050126
	3.8	0.146202	0.105413	0.08004	0.050303
	4	0.147379	0.106296	0.080616	0.050502
	4.2	0.148291	0.106196	0.080341	0.050107
	4.4	0.149823	0.106942	0.081193	0.050891
	4.6	0.151459	0.107369	0.081211	0.05085
	4.8	0.152572	0.107822	0.081378	0.05071
	5	0.1532	0.108319	0.081361	0.050477
	5.2	0.154193	0.108928	0.081339	0.051087
	5.4	0.155378	0.10911	0.081125	0.050909
	5.6	0.156353	0.109717	0.080951	0.050477
	5.8	0.157318	0.110206	0.080724	0.050036
	6	0.159259	0.11111	0.081448	0.050836
	6.2	0.159792	0.110947	0.080727	0.050327
	6.4	0.160548	0.110794	0.080134	0.049934
	6.6	0.161192	0.110842	0.080203	0.050057
	6.8	0.161682	0.111115	0.080233	0.04997
	7	0.162131	0.111485	0.08032	0.050032
	7.2	0.162632	0.111838	0.080821	0.050395
	7.4	0.163512	0.1127	0.081102	0.050846
	7.6	0.164598	0.113128	0.081243	0.050809
	7.8	0.165567	0.113647	0.081613	0.050701
	8	0.166491	0.113898	0.082013	0.050969
	8.2	0.167841	0.114306	0.08264	0.051398
	8.4	0.169353	0.115433	0.083395	0.051946
	8.6	0.169987	0.115859	0.083917	0.05206
	8.8	0.170664	0.116488	0.08425	0.052027
	9	0.17138	0.117112	0.084653	0.05205
	9.2	0.17247	0.117833	0.085193	0.052552
	9.4	0.173733	0.118688	0.085688	0.052378
	9.6	0.17485	0.119936	0.086071	0.052416
	9.8	0.175841	0.120684	0.086504	0.052338
	10	0.176904	0.12108	0.087455	0.052759
	10.2	0.177051	0.121257	0.087517	0.052535
	10.4	0.176858	0.120958	0.087107	0.051843
	10.6	0.177676	0.121647	0.087562	0.051808
	10.8	0.178007	0.121738	0.087273	0.051744
	11	0.178309	0.122087	0.087424	0.052077
	11.2	0.178822	0.122731	0.08763	0.052286
	11.4	0.179722	0.123382	0.087685	0.052547
	11.6	0.180983	0.123824	0.087787	0.052828
	11.8	0.181233	0.123919	0.088086	0.052934
	12	0.181815	0.123774	0.088002	0.05316
	12.2	0.182443	0.124135	0.088133	0.053348
	12.4	0.182896	0.124503	0.088092	0.053269
	12.6	0.183461	0.125167	0.088775	0.053542
	12.8	0.184831	0.12594	0.089239	0.053718
	13	0.185812	0.127186	0.089868	0.054365
	13.2	0.186876	0.128053	0.090185	0.054969
	13.4	0.187743	0.128508	0.090955	0.054915
	13.6	0.188615	0.129288	0.091461	0.055041
	13.8	0.189221	0.129522	0.091887	0.055095
	14	0.19022	0.129898	0.092702	0.055369
	14.2	0.191229	0.130202	0.092976	0.055729
	14.4	0.191521	0.130026	0.09247	0.0552
	14.6	0.193417	0.130903	0.093115	0.055806
	14.8	0.194073	0.130634	0.092918	0.055504
	15	0.194788	0.131234	0.093386	0.055968
	15.2	0.196434	0.131983	0.093919	0.056388
	15.4	0.197384	0.132276	0.093669	0.056573
	15.6	0.198164	0.132455	0.093627	0.057087
	15.8	0.198434	0.132529	0.093167	0.056835
	16	0.198747	0.132668	0.092721	0.056763
	16.2	0.199598	0.133326	0.092836	0.05692
	16.4	0.200288	0.134305	0.093446	0.057526
	16.6	0.200906	0.135034	0.09393	0.057837
	16.8	0.201503	0.1359	0.094204	0.058382
	17	0.201534	0.136566	0.094238	0.058446
	17.2	0.20148	0.136515	0.093984	0.057737
	17.4	0.201967	0.136582	0.094635	0.057743
	17.6	0.202016	0.136705	0.094573	0.057613
	17.8	0.202328	0.136758	0.094873	0.057895
	18	0.203146	0.137235	0.095616	0.05834
	18.2	0.203709	0.137611	0.09597	0.058704
	18.4	0.203677	0.137991	0.096115	0.058597
	18.6	0.204789	0.138709	0.097094	0.059097
	18.8	0.205088	0.13902	0.097192	0.059381
	19	0.206179	0.139834	0.098147	0.060246
	19.2	0.207648	0.140728	0.098802	0.060832
	19.4	0.207726	0.140906	0.098273	0.060767
	19.6	0.208614	0.141361	0.098464	0.061041
	19.8	0.209396	0.142148	0.098515	0.061113
	20	0.209817	0.142922	0.098814	0.061316
	20.2	0.211196	0.143934	0.099559	0.062104
	20.4	0.211734	0.144072	0.099715	0.062474
	20.6	0.212065	0.144097	0.099689	0.062355
	20.8	0.212556	0.144479	0.100422	0.062658
	21	0.213267	0.144495	0.100487	0.062301
	21.2	0.214178	0.144357	0.101126	0.062194
	21.4	0.215152	0.144486	0.101276	0.06219
	21.6	0.215467	0.144569	0.101399	0.061678
	21.8	0.216559	0.145189	0.101991	0.061847
	22	0.217127	0.145981	0.102423	0.062468
	22.2	0.217552	0.146428	0.102268	0.062381
	22.4	0.217903	0.146718	0.102277	0.062271
	22.6	0.218896	0.147374	0.102557	0.062589
	22.8	0.218482	0.147303	0.102088	0.062578
	23	0.218922	0.147588	0.102306	0.062362
	23.2	0.219472	0.147845	0.101909	0.06249
	23.4	0.219244	0.14774	0.101148	0.062035
	23.6	0.219814	0.148029	0.10156	0.062176
	23.8	0.220518	0.148744	0.102426	0.062637
	24	0.221062	0.148991	0.102661	0.062368
	24.2	0.22173	0.149221	0.103015	0.062806
	24.4	0.221783	0.148985	0.103257	0.062369
	24.6	0.221984	0.149354	0.104248	0.062778
	24.8	0.222524	0.149518	0.10496	0.063284
	25	0.222983	0.14991	0.105674	0.063594
	25.2	0.223923	0.150267	0.106648	0.063597
	25.4	0.22446	0.15123	0.107068	0.063493
	25.6	0.224957	0.151506	0.107582	0.063401
	25.8	0.22562	0.152148	0.107965	0.063392
	26	0.225782	0.152584	0.107795	0.063706
	26.2	0.226302	0.15297	0.107614	0.063611
	26.4	0.226703	0.153414	0.107681	0.063681
	26.6	0.227085	0.153705	0.107517	0.063801
	26.8	0.226468	0.152947	0.106524	0.063342
	27	0.227027	0.153074	0.106068	0.063147
	27.2	0.227956	0.153652	0.105983	0.063601
	27.4	0.228542	0.154424	0.106335	0.064002
	27.6	0.229728	0.155452	0.107386	0.064549
	27.8	0.230826	0.156284	0.108113	0.064918
	28	0.231776	0.156681	0.108191	0.06499
	28.2	0.231859	0.157333	0.108928	0.066031
	28.4	0.232304	0.157726	0.109944	0.066767
	28.6	0.233071	0.158262	0.11054	0.067586
	28.8	0.233711	0.158712	0.111025	0.068181
	29	0.233556	0.158945	0.111329	0.068237
	29.2	0.23418	0.158799	0.111634	0.06821
	29.4	0.234487	0.158918	0.111815	0.068205
	29.6	0.234753	0.158684	0.111623	0.067636
	29.8	0.235252	0.159071	0.112418	0.067672
	30	0.235662	0.15922	0.112602	0.068436
	30.2	0.236333	0.15977	0.113233	0.068774
	30.4	0.236582	0.159537	0.113167	0.068691
	30.6	0.237174	0.15997	0.113216	0.068959
	30.8	0.237207	0.160039	0.112836	0.068913
	31	0.237704	0.160445	0.112725	0.068904
	31.2	0.238586	0.160988	0.113087	0.069305
	31.4	0.239578	0.161549	0.113617	0.069945
	31.6	0.240633	0.162033	0.113885	0.070326
	31.8	0.241139	0.162071	0.114161	0.070515
	32	0.241715	0.162745	0.114775	0.071217
	32.2	0.242407	0.163814	0.115426	0.071776
	32.4	0.243522	0.164241	0.115388	0.071947
	32.6	0.243991	0.164728	0.115523	0.071805
	32.8	0.244855	0.165414	0.11592	0.072093
	33	0.24483	0.165415	0.115883	0.072156
	33.2	0.245678	0.165145	0.116344	0.072169
	33.4	0.246064	0.165097	0.116509	0.072033
	33.6	0.245366	0.164757	0.11617	0.071373
	33.8	0.245945	0.164606	0.116335	0.071645
	34	0.246575	0.164933	0.116622	0.07193
	34.2	0.246834	0.165049	0.116765	0.071693
	34.4	0.247057	0.164882	0.116689	0.071349
	34.6	0.247251	0.165634	0.116909	0.071375
	34.8	0.246998	0.165057	0.116723	0.070821
	35	0.247316	0.164992	0.116805	0.070359
	35.2	0.247364	0.164948	0.116746	0.069901
	35.4	0.247338	0.165501	0.116673	0.070138
	35.6	0.247687	0.165597	0.116481	0.069467
	35.8	0.248221	0.166141	0.116725	0.069243
	36	0.249506	0.167402	0.117537	0.06952
	36.2	0.249942	0.167776	0.117456	0.069137
	36.4	0.25009	0.167856	0.117766	0.06936
	36.6	0.250466	0.168578	0.118703	0.069531
	36.8	0.251169	0.169115	0.119279	0.070177
	37	0.251315	0.169543	0.119586	0.070627
	37.2	0.251773	0.16986	0.119794	0.070843
	37.4	0.252079	0.170419	0.120012	0.07123
	37.6	0.252292	0.170804	0.120013	0.07153
	37.8	0.253591	0.171452	0.120539	0.072279
	38	0.254772	0.172655	0.121344	0.073233
	38.2	0.255662	0.172941	0.121572	0.073648
	38.4	0.256721	0.173744	0.122554	0.074078
	38.6	0.256938	0.1743	0.122841	0.074422
	38.8	0.257558	0.174681	0.123641	0.074791
	39	0.257996	0.175326	0.123852	0.0753
	39.2	0.258037	0.175636	0.123685	0.075568
	39.4	0.25863	0.176578	0.124203	0.076293
	39.6	0.259434	0.176634	0.124586	0.075881
	39.8	0.260443	0.177255	0.125026	0.076766
	40	0.260779	0.177342	0.125275	0.076879
	40.2	0.260599	0.177153	0.12505	0.077066
	40.4	0.26088	0.177191	0.125721	0.077391
	40.6	0.261507	0.177727	0.126296	0.077475
	40.8	0.261795	0.177523	0.1259	0.0772
	41	0.26238	0.178196	0.126084	0.077237
	41.2	0.262816	0.178491	0.125898	0.077033
	41.4	0.263082	0.178907	0.126151	0.076965
	41.6	0.263223	0.178881	0.125937	0.076646
	41.8	0.263658	0.178863	0.125694	0.076426
	42	0.264225	0.178651	0.125234	0.076287
	42.2	0.264546	0.17887	0.125252	0.075977
	42.4	0.264881	0.179331	0.125482	0.075841
	42.6	0.264929	0.179485	0.12529	0.075877
	42.8	0.265751	0.180168	0.125753	0.076451
	43	0.266312	0.180616	0.125698	0.076477
	43.2	0.266753	0.181521	0.126107	0.077142
	43.4	0.267416	0.182213	0.126437	0.077711
	43.6	0.267397	0.181983	0.126628	0.077633
	43.8	0.267758	0.182239	0.126988	0.078358
	44	0.26797	0.182376	0.127615	0.078369
	44.2	0.268269	0.182643	0.128202	0.078761
	44.4	0.268423	0.182465	0.128926	0.0789
	44.6	0.268735	0.182528	0.129025	0.07873
	44.8	0.268855	0.182006	0.128331	0.078338
	45	0.268859	0.182352	0.128629	0.078618
	45.2	0.26896	0.182412	0.128708	0.078749
	45.4	0.269109	0.182564	0.128538	0.078637
	45.6	0.269304	0.182417	0.12828	0.078814
	45.8	0.26976	0.18243	0.128254	0.078888
	46	0.270283	0.182398	0.12806	0.078663
	46.2	0.270889	0.18352	0.128882	0.078953
	46.4	0.271646	0.183765	0.128986	0.078856
	46.6	0.272589	0.184515	0.12954	0.079129
	46.8	0.273423	0.184936	0.129468	0.078981
	47	0.274098	0.185189	0.129488	0.078731
	47.2	0.274593	0.186	0.129675	0.079309
	47.4	0.274965	0.186183	0.129879	0.079025
	47.6	0.275649	0.186344	0.130769	0.078874
	47.8	0.276546	0.186794	0.131531	0.079051
	48	0.276867	0.187171	0.131719	0.078853
	48.2	0.277035	0.187077	0.131796	0.078646
	48.4	0.277149	0.186691	0.131883	0.078561
	48.6	0.277283	0.186399	0.131484	0.07827
	48.8	0.277695	0.186736	0.131482	0.078656
	49	0.277862	0.187073	0.131736	0.078824
	49.2	0.278025	0.187395	0.131901	0.079366
	49.4	0.278283	0.187762	0.131688	0.079426
	49.6	0.278713	0.188497	0.132394	0.080057
	49.8	0.279294	0.189063	0.132736	0.080303
	50	0.279427	0.189489	0.13298	0.080465
	50.2	0.279177	0.19011	0.133358	0.080613
	50.4	0.279488	0.190141	0.133253	0.080432
	50.6	0.279684	0.190528	0.133506	0.080878
	50.8	0.279908	0.19084	0.133488	0.080815
	51	0.280243	0.191385	0.133704	0.081062
	51.2	0.280899	0.192027	0.133818	0.081448
	51.4	0.281555	0.192482	0.13444	0.081808
	51.6	0.282481	0.192953	0.13508	0.082391
	51.8	0.283059	0.193276	0.135032	0.082608
	52	0.282551	0.193044	0.134941	0.082364
	52.2	0.282794	0.192657	0.134935	0.082279
	52.4	0.283569	0.19308	0.135609	0.082901
	52.6	0.284023	0.193194	0.135622	0.083146
	52.8	0.284465	0.193913	0.136139	0.083608
	53	0.284601	0.193668	0.136219	0.083486
	53.2	0.284982	0.194259	0.13643	0.083977
	53.4	0.286018	0.194957	0.136944	0.084472
	53.6	0.286377	0.195211	0.136957	0.08429
	53.8	0.286573	0.195267	0.136979	0.084385
	54	0.286751	0.195776	0.13724	0.084814
	54.2	0.287465	0.195978	0.137557	0.084799
	54.4	0.287962	0.195962	0.138019	0.08496
	54.6	0.288531	0.196299	0.138703	0.085317
	54.8	0.289208	0.196841	0.139584	0.085107
	55	0.289947	0.197454	0.140167	0.085369
	55.2	0.291424	0.198226	0.140867	0.086192
	55.4	0.292129	0.199388	0.141691	0.086735
	55.6	0.292837	0.20025	0.142382	0.087549
	55.8	0.293197	0.200529	0.142399	0.087279
	56	0.29271	0.200182	0.142531	0.087203
	56.2	0.293734	0.200825	0.142488	0.087378
	56.4	0.294782	0.201229	0.143254	0.087903
	56.6	0.294808	0.20108	0.142841	0.087703
	56.8	0.295076	0.200989	0.143036	0.088023
	57	0.295311	0.200515	0.142057	0.087858
	57.2	0.295691	0.200894	0.141733	0.087792
	57.4	0.295895	0.201013	0.141708	0.087756
	57.6	0.296047	0.201144	0.141469	0.087508
	57.8	0.296269	0.201378	0.141395	0.087678
	58	0.296671	0.201579	0.140805	0.087941
	58.2	0.29714	0.201583	0.141039	0.087596
	58.4	0.296836	0.201493	0.141218	0.087019
	58.6	0.296981	0.201786	0.141714	0.08665
	58.8	0.29719	0.202332	0.142121	0.086618
	59	0.298003	0.203427	0.143028	0.087173
	59.2	0.298921	0.203901	0.143884	0.087714
	59.4	0.299403	0.204918	0.144272	0.087994
	59.6	0.299758	0.205282	0.145007	0.088763
	59.8	0.299684	0.205019	0.144879	0.088082
	60	0.29995	0.20481	0.14495	0.08811
	60.2	0.301116	0.205383	0.145127	0.088435
	60.4	0.301848	0.205344	0.146031	0.089139
	60.6	0.301447	0.205092	0.145935	0.088833
	60.8	0.301615	0.204859	0.145485	0.089133
	61	0.30198	0.204944	0.145188	0.089242
	61.2	0.30213	0.205132	0.145646	0.089563
	61.4	0.302445	0.205637	0.145762	0.089836
	61.6	0.303095	0.206111	0.146	0.090283
	61.8	0.303105	0.206081	0.145479	0.090245
	62	0.303414	0.206533	0.145363	0.090569
	62.2	0.303684	0.207166	0.145914	0.090711
	62.4	0.303875	0.207799	0.146273	0.090748
	62.6	0.303999	0.2084	0.146706	0.090903
	62.8	0.304402	0.208771	0.146976	0.091286
	63	0.304563	0.209039	0.147314	0.091164
	63.2	0.304574	0.20902	0.147291	0.09085
	63.4	0.30498	0.209336	0.147568	0.090891
	63.6	0.304733	0.209453	0.147576	0.091082
	63.8	0.305308	0.209854	0.147504	0.090519
	64	0.30549	0.209837	0.147285	0.090274
	64.2	0.306145	0.209892	0.147358	0.09033
	64.4	0.306573	0.21033	0.147732	0.090622
	64.6	0.306233	0.2103	0.148029	0.090382
	64.8	0.306936	0.210671	0.1482	0.090778
	65	0.307085	0.210932	0.148872	0.090913
	65.2	0.307668	0.21114	0.148717	0.091215
	65.4	0.308173	0.211677	0.14872	0.091523
	65.6	0.308373	0.211502	0.14876	0.091766
	65.8	0.308752	0.212128	0.149163	0.092332
	66	0.308666	0.212741	0.149263	0.092649
	66.2	0.309129	0.213589	0.149956	0.093149
	66.4	0.308804	0.213327	0.150057	0.092958
	66.6	0.308647	0.21296	0.149913	0.092844
	66.8	0.308868	0.212805	0.150171	0.092829
	67	0.308686	0.21286	0.150446	0.092353
	67.2	0.309081	0.213316	0.150867	0.092706
	67.4	0.309937	0.21378	0.151593	0.093285
	67.6	0.310441	0.214048	0.151585	0.093917
	67.8	0.311263	0.214409	0.152207	0.094198
	68	0.311132	0.213761	0.152021	0.093997
	68.2	0.31258	0.214432	0.152902	0.094875
	68.4	0.313475	0.215271	0.153387	0.094967
	68.6	0.313683	0.215329	0.153787	0.094756
	68.8	0.313946	0.215643	0.153572	0.094672
	69	0.314819	0.216255	0.154029	0.094972
	69.2	0.315426	0.216163	0.153553	0.094747
	69.4	0.315425	0.216097	0.153581	0.094462
	69.6	0.315419	0.216026	0.153313	0.093864
	69.8	0.315685	0.216503	0.153614	0.093872
	70	0.31562	0.216483	0.153494	0.09384
	70.2	0.315938	0.216814	0.153875	0.093846
	70.4	0.315895	0.216396	0.153325	0.093248
	70.6	0.316646	0.216863	0.153939	0.093587
	70.8	0.31695	0.217247	0.154228	0.09358
	71	0.316749	0.217671	0.15433	0.093671
	71.2	0.316864	0.218197	0.154502	0.094084
	71.4	0.316785	0.218199	0.154568	0.094165
	71.6	0.317022	0.217854	0.154409	0.09449
	71.8	0.317127	0.218437	0.154808	0.094853
	72	0.317535	0.218559	0.154623	0.094903
	72.2	0.318089	0.219446	0.154667	0.09531
	72.4	0.318112	0.219892	0.154536	0.094912
	72.6	0.318012	0.21987	0.154266	0.095248
	72.8	0.317925	0.219921	0.154567	0.095385
	73	0.318493	0.219841	0.15519	0.095212
	73.2	0.318755	0.219781	0.155481	0.094983
	73.4	0.31898	0.219826	0.155531	0.094872
	73.6	0.320007	0.220271	0.155818	0.095091
	73.8	0.320505	0.22034	0.156279	0.095504
	74	0.321393	0.220611	0.156857	0.095945
	74.2	0.322091	0.221217	0.157594	0.096439
	74.4	0.322885	0.221703	0.157973	0.096607
	74.6	0.323418	0.222237	0.158322	0.097405
	74.8	0.323485	0.222562	0.158306	0.097665
	75	0.324258	0.223357	0.158845	0.097978
	75.2	0.325203	0.224223	0.159457	0.098524
	75.4	0.325237	0.224349	0.159286	0.098595
	75.6	0.326238	0.225158	0.159542	0.099208
	75.8	0.326756	0.225729	0.159822	0.099572
	76	0.327902	0.226145	0.159583	0.09981
	76.2	0.328158	0.226685	0.159739	0.100137
	76.4	0.328491	0.226874	0.160174	0.100218
	76.6	0.328435	0.226508	0.159969	0.100127
	76.8	0.32859	0.2264	0.160686	0.100063
	77	0.328975	0.226685	0.161468	0.100221
	77.2	0.329439	0.226891	0.161733	0.100312
	77.4	0.330173	0.227198	0.161869	0.100299
	77.6	0.331159	0.227573	0.162656	0.100524
	77.8	0.331012	0.227398	0.162883	0.100679
	78	0.331411	0.227511	0.163117	0.10075
	78.2	0.331211	0.227773	0.163123	0.10085
	78.4	0.331282	0.227987	0.163028	0.10095
	78.6	0.330842	0.227935	0.162876	0.10103
	78.8	0.330703	0.227951	0.163057	0.101161
	79	0.331702	0.22852	0.163096	0.101848
	79.2	0.33169	0.228417	0.162935	0.102159
	79.4	0.330705	0.227734	0.161944	0.101453
	79.6	0.331457	0.228204	0.16203	0.101701
	79.8	0.331921	0.228225	0.16201	0.101566
	80	0.33212	0.228536	0.161804	0.101594
	80.2	0.332248	0.229244	0.162135	0.101738
	80.4	0.332207	0.229484	0.162052	0.101691
	80.6	0.332347	0.229354	0.162089	0.101652
	80.8	0.332629	0.229668	0.162391	0.101732
	81	0.332673	0.230128	0.162268	0.101476
	81.2	0.33322	0.230185	0.162104	0.101328
	81.4	0.334246	0.230896	0.162556	0.101585
	81.6	0.334643	0.23123	0.162922	0.101894
	81.8	0.334994	0.231245	0.163303	0.101978
	82	0.334949	0.231117	0.163234	0.101702
	82.2	0.335416	0.231621	0.163766	0.102423
	82.4	0.335922	0.232049	0.164595	0.103076
	82.6	0.33631	0.23244	0.165396	0.103657
	82.8	0.337394	0.232982	0.165656	0.104589
	83	0.338498	0.233621	0.166001	0.105524
	83.2	0.338463	0.233337	0.166238	0.10519
	83.4	0.338711	0.233576	0.166435	0.104934
	83.6	0.339389	0.23431	0.167287	0.105246
	83.8	0.339726	0.234857	0.167902	0.105407
	84	0.339406	0.23464	0.16755	0.105492
	84.2	0.340089	0.235258	0.16782	0.105921
	84.4	0.340164	0.23521	0.16766	0.105811
	84.6	0.34037	0.234683	0.167342	0.105125
	84.8	0.340495	0.234416	0.166778	0.104745
	85	0.340914	0.234506	0.166856	0.104493
	85.2	0.341485	0.234151	0.166923	0.104348
	85.4	0.341736	0.234075	0.166711	0.103938
	85.6	0.341463	0.234092	0.167017	0.103874
	85.8	0.341209	0.233776	0.166763	0.103418
	86	0.341133	0.233986	0.166576	0.103452
	86.2	0.342247	0.235024	0.167081	0.104503
	86.4	0.342663	0.235236	0.167524	0.104524
	86.6	0.342802	0.235345	0.167731	0.104778
	86.8	0.343093	0.235538	0.167804	0.104773
	87	0.342937	0.23563	0.16807	0.104757
	87.2	0.34309	0.235895	0.16862	0.104777
	87.4	0.343289	0.236762	0.169325	0.104946
	87.6	0.343569	0.237813	0.170395	0.105673
	87.8	0.343971	0.238485	0.17095	0.106174
	88	0.34384	0.23867	0.171021	0.106274
	88.2	0.345262	0.240144	0.172077	0.106892
	88.4	0.345714	0.240808	0.17253	0.107182
	88.6	0.346271	0.240708	0.173085	0.107253
	88.8	0.346815	0.240793	0.173299	0.107208
	89	0.347108	0.241083	0.174125	0.107394
	89.2	0.347479	0.241018	0.173685	0.107069
	89.4	0.347321	0.240981	0.173525	0.106655
	89.6	0.347261	0.24114	0.173713	0.106805
	89.8	0.34751	0.241147	0.173565	0.106804
	90	0.348308	0.241304	0.173632	0.107074
	90.2	0.348783	0.241293	0.173688	0.107539
	90.4	0.347991	0.240771	0.173428	0.106976
	90.6	0.347484	0.240559	0.172907	0.106751
	90.8	0.347627	0.240499	0.173119	0.106554
	91	0.347727	0.240427	0.173152	0.106967
	91.2	0.348587	0.2412	0.173765	0.107418
	91.4	0.34926	0.241858	0.174257	0.107801
	91.6	0.350076	0.242933	0.17474	0.108432
	91.8	0.350641	0.24325	0.174739	0.108713
	92	0.35137	0.244218	0.17542	0.109346
	92.2	0.352478	0.245351	0.176068	0.110431
	92.4	0.352478	0.245349	0.176381	0.110864
	92.6	0.352855	0.245109	0.17659	0.110657
	92.8	0.353037	0.245496	0.176694	0.110712
	93	0.353684	0.24595	0.177341	0.111057
	93.2	0.354475	0.245762	0.177336	0.110745
	93.4	0.354564	0.245835	0.177728	0.110933
	93.6	0.354917	0.246101	0.177957	0.111027
	93.8	0.355769	0.246836	0.178757	0.111774
	94	0.355967	0.247069	0.178621	0.111793
	94.2	0.35612	0.247193	0.178636	0.11193
	94.4	0.355694	0.247009	0.177793	0.111566
	94.6	0.356221	0.24713	0.177765	0.111586
	94.8	0.356755	0.247226	0.178318	0.111632
	95	0.357118	0.247164	0.177575	0.111425
	95.2	0.357503	0.247618	0.177264	0.111365
	95.4	0.356859	0.247299	0.176473	0.111041
	95.6	0.356132	0.247437	0.175814	0.110697
	95.8	0.355793	0.247473	0.175716	0.110716
	96	0.355505	0.2476	0.175663	0.110462
	96.2	0.355588	0.247668	0.175664	0.110189
	96.4	0.355628	0.247254	0.175687	0.11036
	96.6	0.355598	0.247176	0.175375	0.11002
	96.8	0.355613	0.247527	0.175616	0.110079
	97	0.35671	0.247863	0.176209	0.110234
	97.2	0.357036	0.247596	0.176669	0.110591
	97.4	0.357496	0.248309	0.1773	0.111462
	97.6	0.358222	0.248967	0.178137	0.11187
	97.8	0.359205	0.249965	0.178847	0.112485
	98	0.359439	0.249897	0.178802	0.112462
	98.2	0.360374	0.250029	0.179095	0.112823
	98.4	0.360531	0.249962	0.179348	0.112574
	98.6	0.361289	0.250215	0.180317	0.112862
	98.8	0.361375	0.250314	0.180443	0.112947
	99	0.361236	0.250421	0.18024	0.112941
	99.2	0.360698	0.250532	0.18042	0.113038
	99.4	0.360076	0.250507	0.180322	0.112861
	99.6	0.359908	0.251023	0.180737	0.113025
	99.8	0.360326	0.251193	0.181022	0.112952
	100	0.360888	0.251341	0.18118	0.112631
	100.2	0.36176	0.251862	0.181769	0.112791
	100.4	0.362379	0.251964	0.181813	0.113433
	100.6	0.36269	0.252007	0.181656	0.112808
	100.8	0.363191	0.252292	0.181945	0.11286
	101	0.363955	0.252294	0.182119	0.113013
	101.2	0.364009	0.252419	0.182274	0.113398
	101.4	0.364789	0.253232	0.182712	0.11389
	101.6	0.365518	0.253522	0.182681	0.113848
	101.8	0.366404	0.253909	0.183039	0.114137
	102	0.366869	0.253679	0.183229	0.114452
	102.2	0.366487	0.253245	0.182881	0.114192
	102.4	0.366788	0.253153	0.183396	0.11445
	102.6	0.366805	0.253233	0.183731	0.114661
	102.8	0.36659	0.253457	0.18361	0.114944
	103	0.366555	0.254078	0.183771	0.115342
	103.2	0.366401	0.254539	0.183992	0.115578
	103.4	0.366514	0.255129	0.18402	0.115787
	103.6	0.366075	0.255011	0.183991	0.115878
	103.8	0.366448	0.25543	0.184099	0.11606
	104	0.366322	0.255642	0.184234	0.115764
	104.2	0.366401	0.255679	0.183947	0.115592
	104.4	0.3669	0.255904	0.18406	0.115777
	104.6	0.366819	0.255711	0.184053	0.115232
	104.8	0.366693	0.256035	0.184345	0.11542
	105	0.366815	0.256148	0.184469	0.115647
	105.2	0.36771	0.25698	0.185389	0.116678
	105.4	0.368357	0.257431	0.185802	0.117107
	105.6	0.369106	0.257559	0.186516	0.117459
	105.8	0.369583	0.257985	0.187404	0.117705
	106	0.369408	0.257808	0.187206	0.117326
	106.2	0.369854	0.257868	0.187582	0.117181
	106.4	0.370821	0.258232	0.188151	0.117015
	106.6	0.371174	0.258359	0.18837	0.116913
	106.8	0.371907	0.258792	0.188723	0.117466
	107	0.372316	0.259479	0.189041	0.117729
	107.2	0.372573	0.260178	0.189687	0.118261
	107.4	0.372577	0.259926	0.189237	0.118215
	107.6	0.372653	0.260231	0.189286	0.118587
	107.8	0.372841	0.260631	0.188503	0.118662
	108	0.373338	0.261058	0.188563	0.118722
	108.2	0.373733	0.261654	0.188552	0.119036
	108.4	0.374205	0.262111	0.188828	0.119434
	108.6	0.374563	0.262539	0.188813	0.119748
	108.8	0.374803	0.262635	0.188119	0.120033
	109	0.374967	0.262534	0.187943	0.119988
	109.2	0.375019	0.26262	0.187738	0.120017
	109.4	0.375021	0.262653	0.187572	0.119626
	109.6	0.375337	0.262781	0.188006	0.119548
	109.8	0.375626	0.263145	0.187674	0.119198
	110	0.375502	0.262812	0.187195	0.118566
	110.2	0.3766	0.262844	0.187554	0.118919
	110.4	0.37673	0.262475	0.187806	0.118636
	110.6	0.37692	0.262279	0.188441	0.118627
	110.8	0.377408	0.26308	0.189691	0.119003
	111	0.377494	0.263275	0.190268	0.119121
	111.2	0.377637	0.263868	0.191246	0.119941
	111.4	0.377775	0.263748	0.191659	0.1199
	111.6	0.378197	0.264515	0.192491	0.120631
	111.8	0.378958	0.264964	0.19313	0.121135
	112	0.380007	0.265735	0.194275	0.121689
	112.2	0.379937	0.265909	0.194184	0.121484
	112.4	0.380265	0.265864	0.194036	0.121259
	112.6	0.380604	0.266159	0.194019	0.121261
	112.8	0.380517	0.265635	0.1936	0.120776
	113	0.380776	0.265854	0.193858	0.120927
	113.2	0.380723	0.265801	0.193133	0.12115
	113.4	0.381216	0.266026	0.192862	0.121104
	113.6	0.381141	0.266367	0.192393	0.121366
	113.8	0.381434	0.266578	0.19196	0.121642
	114	0.381451	0.266328	0.191528	0.121576
	114.2	0.382315	0.26619	0.191654	0.122119
	114.4	0.381601	0.266247	0.191599	0.121714
	114.6	0.381894	0.266731	0.191899	0.122146
	114.8	0.382504	0.267862	0.192697	0.123081
	115	0.382868	0.26794	0.192448	0.123129
	115.2	0.38253	0.268248	0.192554	0.12337
	115.4	0.3825	0.268117	0.19255	0.123122
	115.6	0.382303	0.267776	0.192399	0.123189
	115.8	0.382747	0.268223	0.192477	0.122988
	116	0.382563	0.268158	0.192227	0.122376
	116.2	0.382872	0.268506	0.192464	0.122266
	116.4	0.383343	0.268433	0.192722	0.122571
	116.6	0.384096	0.26904	0.193318	0.123285
	116.8	0.383903	0.268315	0.193431	0.122847
	117	0.384139	0.268639	0.193412	0.123073
	117.2	0.383946	0.268733	0.193273	0.122791
	117.4	0.38431	0.269133	0.193597	0.12256
	117.6	0.384859	0.269378	0.194198	0.122555
	117.8	0.384992	0.269389	0.194186	0.12229
	118	0.385403	0.269971	0.194566	0.122317
	118.2	0.386048	0.270434	0.195259	0.123032
	118.4	0.385927	0.270725	0.195344	0.123074
	118.6	0.386516	0.271208	0.195757	0.123669
	118.8	0.387065	0.271709	0.195512	0.123412
	119	0.387397	0.27199	0.195553	0.123099
	119.2	0.387305	0.272255	0.195932	0.122794
	119.4	0.387743	0.272696	0.196748	0.123206
	119.6	0.388077	0.272928	0.197174	0.123483
	119.8	0.388936	0.273917	0.197763	0.123762
	120	0.38983	0.274497	0.198526	0.124588
	120.2	0.390948	0.275325	0.199028	0.125923
	120.4	0.391406	0.275761	0.199421	0.12657
	120.6	0.391583	0.2757	0.199503	0.126691
	120.8	0.39141	0.275366	0.19945	0.126333
	121	0.391708	0.275777	0.199484	0.126574
	121.2	0.391674	0.275579	0.199389	0.126388
	121.4	0.391467	0.275331	0.199155	0.126072
	121.6	0.391462	0.274732	0.198914	0.125766
	121.8	0.391452	0.275141	0.198694	0.12589
	122	0.391861	0.275185	0.198922	0.126288
	122.2	0.391564	0.274607	0.198656	0.126441
	122.4	0.391383	0.274128	0.19796	0.125728
	122.6	0.391414	0.274288	0.197818	0.125348
	122.8	0.392095	0.27462	0.198189	0.125126
	123	0.392688	0.274967	0.198868	0.125386
	123.2	0.393177	0.275709	0.199353	0.125658
	123.4	0.393677	0.276081	0.20005	0.126278
	123.6	0.394447	0.276488	0.200188	0.126477
	123.8	0.394921	0.276961	0.200574	0.12697
	124	0.395808	0.27781	0.201181	0.127955
	124.2	0.395692	0.278313	0.20126	0.128008
	124.4	0.396043	0.278648	0.201636	0.128216
	124.6	0.396227	0.278396	0.201654	0.128398
	124.8	0.396332	0.2786	0.202102	0.12864
	125	0.396113	0.278609	0.202323	0.128542
	125.2	0.395676	0.278215	0.202135	0.12852
	125.4	0.395574	0.27783	0.201721	0.128325
	125.6	0.395591	0.277733	0.201569	0.128298
	125.8	0.395793	0.277976	0.201402	0.128102
	126	0.395618	0.277515	0.201525	0.127646
	126.2	0.395355	0.277488	0.2015	0.12742
	126.4	0.395874	0.277668	0.201618	0.126924
	126.6	0.396508	0.278103	0.202242	0.126657
	126.8	0.39675	0.278303	0.202421	0.126843
	127	0.397047	0.278629	0.202533	0.127375
	127.2	0.397298	0.278991	0.202574	0.127358
	127.4	0.398131	0.27934	0.202998	0.127635
	127.6	0.398734	0.280006	0.203103	0.127503
	127.8	0.398785	0.280196	0.203417	0.127872
	128	0.399385	0.280732	0.203586	0.128161
	128.2	0.399283	0.280899	0.203918	0.128242
	128.4	0.3999	0.281239	0.204384	0.129136
	128.6	0.400307	0.281489	0.204482	0.129645
	128.8	0.400879	0.281717	0.204602	0.130271
	129	0.401063	0.281961	0.204541	0.13063
	129.2	0.401229	0.281846	0.204126	0.130814
	129.4	0.401455	0.28207	0.203716	0.130692
	129.6	0.401346	0.282881	0.20395	0.131021
	129.8	0.40183	0.282691	0.203963	0.130853
	130	0.401946	0.282451	0.204343	0.13078
	130.2	0.40196	0.282578	0.204659	0.130658
	130.4	0.40249	0.282867	0.205184	0.130603
	130.6	0.402375	0.283148	0.205418	0.130474
	130.8	0.402144	0.282956	0.205431	0.130436
	131	0.401827	0.283262	0.205996	0.130609
	131.2	0.402294	0.283833	0.206479	0.130402
	131.4	0.402941	0.284695	0.207233	0.130601
	131.6	0.403127	0.285316	0.206875	0.130241
	131.8	0.403224	0.285223	0.207021	0.13034
	132	0.403921	0.285401	0.207029	0.130447
	132.2	0.403893	0.285464	0.207673	0.130412
	132.4	0.404088	0.285647	0.207655	0.130531
	132.6	0.404805	0.285732	0.207875	0.130658
	132.8	0.405507	0.285528	0.208228	0.130901
	133	0.405768	0.286014	0.208979	0.130793
	133.2	0.40655	0.286468	0.209679	0.131296
	133.4	0.407613	0.287297	0.210845	0.132259
	133.6	0.408407	0.287779	0.211784	0.13296
	133.8	0.408908	0.286964	0.211915	0.132958
	134	0.409387	0.287035	0.212377	0.133313
	134.2	0.409362	0.287063	0.212776	0.13312
	134.4	0.409555	0.287436	0.212982	0.133437
	134.6	0.409285	0.287559	0.212844	0.133357
	134.8	0.409518	0.287845	0.213019	0.133712
	135	0.409078	0.287971	0.212504	0.133734
	135.2	0.409508	0.288274	0.212365	0.13385
	135.4	0.409652	0.28857	0.211944	0.133774
	135.6	0.409724	0.288862	0.2111	0.133438
	135.8	0.409512	0.288296	0.210934	0.133619
	136	0.409266	0.288005	0.210309	0.133356
	136.2	0.408893	0.287689	0.210091	0.132907
	136.4	0.409159	0.287999	0.210219	0.133386
	136.6	0.409341	0.28801	0.210373	0.133311
	136.8	0.409809	0.288064	0.210612	0.133186
	137	0.409707	0.288904	0.210988	0.133534
	137.2	0.410926	0.289831	0.211691	0.134805
	137.4	0.411983	0.290752	0.212056	0.135201
	137.6	0.412141	0.290796	0.211642	0.134715
	137.8	0.412384	0.290819	0.211635	0.134829
	138	0.41313	0.29167	0.212177	0.134921
	138.2	0.413402	0.291867	0.212196	0.134812
	138.4	0.413994	0.292781	0.212868	0.13539
	138.6	0.414604	0.293001	0.212986	0.135299
	138.8	0.415097	0.293107	0.213179	0.135694
	139	0.415318	0.29308	0.213244	0.135952
	139.2	0.415832	0.293599	0.214084	0.136448
	139.4	0.415906	0.29391	0.214726	0.136523
	139.6	0.415495	0.293658	0.214442	0.136769
	139.8	0.415317	0.293263	0.214595	0.137394
	140	0.414838	0.292979	0.214434	0.136987
	140.2	0.414942	0.292907	0.215021	0.13736
	140.4	0.415041	0.292988	0.215405	0.137894
	140.6	0.414436	0.292863	0.215131	0.137663
	140.8	0.414503	0.293091	0.214926	0.137742
	141	0.413886	0.293481	0.214722	0.138084
	141.2	0.41461	0.293851	0.214738	0.138174
	141.4	0.414592	0.293838	0.214193	0.13768
	141.6	0.414536	0.293866	0.213845	0.137152
	141.8	0.414539	0.294412	0.213761	0.137242
	142	0.414685	0.294413	0.213422	0.136824
	142.2	0.414915	0.29403	0.21321	0.136751
	142.4	0.415227	0.293834	0.213216	0.136349
	142.6	0.416108	0.293737	0.21321	0.135662
	142.8	0.41679	0.294209	0.213558	0.135988
	143	0.417155	0.294476	0.214013	0.136134
	143.2	0.41762	0.294851	0.214656	0.136176
	143.4	0.417831	0.29448	0.215226	0.136023
	143.6	0.418188	0.294291	0.215457	0.136053
	143.8	0.419123	0.294419	0.216493	0.136391
	144	0.419279	0.294172	0.2169	0.13611
	144.2	0.420076	0.294282	0.217466	0.136436
	144.4	0.42061	0.29469	0.21778	0.136803
	144.6	0.420474	0.295033	0.21796	0.136908
	144.8	0.42108	0.29576	0.218358	0.137253
	145	0.420935	0.295758	0.218416	0.137364
	145.2	0.420892	0.295876	0.218069	0.137158
	145.4	0.421242	0.296725	0.218195	0.137331
	145.6	0.420852	0.297017	0.2178	0.136965
	145.8	0.4206	0.296984	0.217461	0.13707
	146	0.420666	0.296958	0.217122	0.136989
	146.2	0.42121	0.297299	0.21718	0.137494
	146.4	0.421635	0.297824	0.217014	0.137264
	146.6	0.421984	0.298408	0.217389	0.137328
	146.8	0.422063	0.298428	0.217376	0.137493
	147	0.422135	0.298729	0.217553	0.137678
	147.2	0.422507	0.299259	0.218128	0.138194
	147.4	0.422816	0.299151	0.21834	0.137882
	147.6	0.423377	0.299721	0.21881	0.138267
	147.8	0.423404	0.299623	0.219294	0.138759
	148	0.423797	0.299462	0.219591	0.138807
	148.2	0.424357	0.299876	0.220093	0.138958
	148.4	0.424606	0.300149	0.220432	0.139242
	148.6	0.424365	0.299903	0.220377	0.138536
	148.8	0.424851	0.300223	0.221056	0.138671
	149	0.42456	0.299832	0.221069	0.138597
	149.2	0.424773	0.300214	0.221017	0.138509
	149.4	0.425737	0.301149	0.221746	0.138891
	149.6	0.425308	0.30073	0.221596	0.139074
	149.8	0.425595	0.300781	0.221728	0.139208
	150	0.426073	0.301094	0.22232	0.139442
	150.2	0.426352	0.300857	0.222357	0.139376
	150.4	0.42634	0.300755	0.222447	0.138759
	150.6	0.426423	0.300507	0.222503	0.138758
	150.8	0.426667	0.300353	0.22221	0.138783
	151	0.42665	0.300668	0.222504	0.138987
	151.2	0.427126	0.300992	0.222946	0.139445
	151.4	0.427408	0.300786	0.222786	0.139122
	151.6	0.428046	0.301546	0.223423	0.139898
	151.8	0.427739	0.301183	0.223718	0.139966
	152	0.42825	0.301467	0.223873	0.14009
	152.2	0.428215	0.301699	0.223671	0.139839
	152.4	0.428138	0.301532	0.223073	0.139417
	152.6	0.427962	0.30191	0.222995	0.139114
	152.8	0.428183	0.302467	0.223314	0.139694
	153	0.428449	0.303152	0.2234	0.140506
	153.2	0.429059	0.303881	0.223216	0.140913
	153.4	0.429557	0.304644	0.223687	0.141642
	153.6	0.428746	0.304358	0.223299	0.141547
	153.8	0.429204	0.30492	0.2238	0.141817
	154	0.429517	0.305249	0.224397	0.142174
	154.2	0.42944	0.305467	0.22393	0.142248
	154.4	0.430066	0.306004	0.224336	0.142594
	154.6	0.430634	0.306434	0.224869	0.143088
	154.8	0.431166	0.306613	0.225074	0.143317
	155	0.431521	0.306762	0.225713	0.143289
	155.2	0.432187	0.307194	0.22632	0.143686
	155.4	0.432355	0.307227	0.225921	0.143568
	155.6	0.43327	0.30805	0.226803	0.14405
	155.8	0.433357	0.307428	0.226786	0.143949
	156	0.433785	0.307332	0.22679	0.14403
	156.2	0.434511	0.307525	0.226826	0.14411
	156.4	0.434368	0.307339	0.226432	0.14376
	156.6	0.434449	0.307451	0.226905	0.143905
	156.8	0.434587	0.306865	0.226835	0.143696
	157	0.435094	0.306858	0.22671	0.143895
	157.2	0.435367	0.307247	0.226619	0.144035
	157.4	0.435112	0.307082	0.226308	0.143623
	157.6	0.43484	0.306719	0.225521	0.143106
	157.8	0.43534	0.307125	0.22598	0.143711
	158	0.435227	0.307505	0.225936	0.143484
	158.2	0.435506	0.307635	0.225618	0.143725
	158.4	0.435874	0.308011	0.226438	0.143866
	158.6	0.436197	0.308681	0.226989	0.144253
	158.8	0.435845	0.308958	0.226849	0.144258
	159	0.435912	0.309545	0.227453	0.144222
	159.2	0.436068	0.310186	0.227883	0.144897
	159.4	0.436247	0.31072	0.227606	0.145249
	159.6	0.436762	0.311323	0.228302	0.146011
	159.8	0.43656	0.311188	0.228453	0.146218
	160	0.436304	0.311248	0.228512	0.146336
	160.2	0.436854	0.31191	0.228875	0.14664
	160.4	0.436748	0.311898	0.228886	0.146869
	160.6	0.437408	0.312143	0.229396	0.14711
	160.8	0.437728	0.311961	0.229101	0.147011
	161	0.437856	0.311887	0.228513	0.146725
	161.2	0.437411	0.31187	0.227995	0.145974
	161.4	0.43789	0.311313	0.227791	0.145813
	161.6	0.438329	0.310874	0.228095	0.146001
	161.8	0.438086	0.310463	0.229004	0.146063
	162	0.438038	0.310366	0.229472	0.145871
	162.2	0.438836	0.310381	0.230264	0.146338
	162.4	0.439381	0.310711	0.231335	0.146655
	162.6	0.440185	0.311356	0.232244	0.147122
	162.8	0.440574	0.311856	0.232702	0.147285
	163	0.441264	0.312232	0.233597	0.147817
	163.2	0.441553	0.312637	0.233914	0.148706
	163.4	0.441988	0.312986	0.234154	0.149057
	163.6	0.442184	0.313224	0.234297	0.148941
	163.8	0.443083	0.31378	0.234654	0.149084
	164	0.443784	0.31425	0.234627	0.149295
	164.2	0.444773	0.315547	0.235016	0.150309
	164.4	0.445379	0.316489	0.235098	0.150888
	164.6	0.445499	0.316715	0.234839	0.150542
	164.8	0.444887	0.316472	0.233771	0.149964
	165	0.444577	0.316508	0.232846	0.149455
	165.2	0.444094	0.316303	0.232308	0.14876
	165.4	0.444665	0.316197	0.232814	0.148974
	165.6	0.444148	0.315944	0.233317	0.148694
	165.8	0.443931	0.316006	0.233746	0.148511
	166	0.444122	0.31641	0.234286	0.148351
	166.2	0.444563	0.316734	0.234676	0.148433
	166.4	0.44467	0.316968	0.234505	0.14837
	166.6	0.444945	0.317024	0.234509	0.148635
	166.8	0.445523	0.317378	0.234402	0.148649
	167	0.445253	0.317372	0.234699	0.148743
	167.2	0.445226	0.317381	0.234483	0.148603
	167.4	0.445685	0.317416	0.23439	0.148501
	167.6	0.445654	0.317105	0.234086	0.148008
	167.8	0.446402	0.317473	0.233953	0.148576
	168	0.446503	0.317553	0.233847	0.148699
	168.2	0.446752	0.31823	0.234435	0.149269
	168.4	0.44727	0.318751	0.234598	0.149154
	168.6	0.447162	0.318495	0.234114	0.149142
	168.8	0.447072	0.318464	0.233677	0.149117
	169	0.447588	0.318571	0.233661	0.149304
	169.2	0.447647	0.31873	0.233761	0.149359
	169.4	0.448415	0.319514	0.234619	0.149637
	169.6	0.448815	0.320462	0.235297	0.149935
	169.8	0.449251	0.320725	0.235653	0.150047
	170	0.449273	0.32112	0.236435	0.150488
	170.2	0.449964	0.321503	0.237097	0.150815
	170.4	0.449944	0.321604	0.236905	0.150947
	170.6	0.450525	0.322046	0.237598	0.151525
	170.8	0.450433	0.322238	0.237937	0.151269
	171	0.450148	0.322051	0.238059	0.151024
	171.2	0.450437	0.321754	0.237956	0.150786
	171.4	0.450459	0.321151	0.237538	0.150548
	171.6	0.45056	0.32091	0.237812	0.150125
	171.8	0.451112	0.321069	0.237992	0.150127
	172	0.451664	0.321045	0.238362	0.150066
	172.2	0.451589	0.320949	0.238534	0.150021
	172.4	0.452077	0.321362	0.238693	0.150711
	172.6	0.45192	0.32111	0.238431	0.150818
	172.8	0.451921	0.320815	0.238493	0.150737
	173	0.452941	0.321422	0.238742	0.151587
	173.2	0.453119	0.32215	0.238502	0.151483
	173.4	0.453765	0.322787	0.238816	0.151606
	173.6	0.454066	0.323391	0.239191	0.151791
	173.8	0.454381	0.323821	0.239917	0.152584
	174	0.454371	0.324127	0.240411	0.153107
	174.2	0.454633	0.324557	0.240358	0.152981
	174.4	0.45389	0.324396	0.239706	0.152974
	174.6	0.454321	0.324653	0.23989	0.15373
	174.8	0.454497	0.324455	0.239847	0.153864
	175	0.45482	0.324304	0.239668	0.153765
	175.2	0.454955	0.324254	0.239701	0.153745
	175.4	0.454801	0.323658	0.239037	0.153216
	175.6	0.455017	0.323737	0.239248	0.153353
	175.8	0.455173	0.323329	0.239022	0.153352
	176	0.455749	0.323254	0.239109	0.153663
	176.2	0.455405	0.323128	0.23924	0.153874
	176.4	0.455926	0.323548	0.239795	0.154262
	176.6	0.456234	0.323778	0.240164	0.153982
	176.8	0.456246	0.323647	0.240304	0.153847
	177	0.457094	0.325047	0.240891	0.154743
	177.2	0.457286	0.326022	0.241242	0.154532
	177.4	0.458251	0.326826	0.242365	0.155135
	177.6	0.458956	0.327331	0.242881	0.155142
	177.8	0.458862	0.327351	0.242922	0.154998
	178	0.458551	0.327342	0.242499	0.154595
	178.2	0.458399	0.32756	0.242515	0.15469
	178.4	0.458496	0.32744	0.242645	0.155379
	178.6	0.45917	0.327635	0.243136	0.156439
	178.8	0.459486	0.327891	0.243414	0.15644
	179	0.459108	0.327612	0.243029	0.156286
	179.2	0.459016	0.327491	0.242699	0.15624
	179.4	0.458934	0.327249	0.242091	0.156411
	179.6	0.458894	0.326865	0.241366	0.156625
	179.8	0.459156	0.326921	0.241505	0.15674
	180	0.459579	0.326708	0.241413	0.156661
	180.2	0.459388	0.326909	0.241436	0.156822
	180.4	0.459684	0.327018	0.241367	0.156669
	180.6	0.459911	0.327256	0.241679	0.156484
	180.8	0.45988	0.327168	0.241684	0.156203
	181	0.461606	0.328277	0.242632	0.157034
	181.2	0.462222	0.328633	0.24304	0.156974
	181.4	0.462844	0.328302	0.243043	0.156968
	181.6	0.462775	0.32797	0.242564	0.156223
	181.8	0.462282	0.327829	0.242653	0.156387
	182	0.462592	0.328491	0.243263	0.15668
	182.2	0.462117	0.32855	0.243596	0.156762
	182.4	0.46205	0.328797	0.243622	0.156893
	182.6	0.462196	0.328764	0.244094	0.156949
	182.8	0.4617	0.329223	0.244037	0.156644
	183	0.461179	0.328955	0.244059	0.156534
	183.2	0.460798	0.328982	0.24373	0.156134
	183.4	0.460621	0.329274	0.24366	0.156255
	183.6	0.460805	0.329358	0.243564	0.156283
	183.8	0.460793	0.330052	0.244047	0.156536
	184	0.460863	0.330292	0.243976	0.156566
	184.2	0.461035	0.330907	0.244104	0.156545
	184.4	0.461572	0.331248	0.244067	0.156652
	184.6	0.462204	0.331539	0.244487	0.156637
	184.8	0.463232	0.331956	0.245035	0.157154
	185	0.464719	0.332414	0.245253	0.157843
	185.2	0.464637	0.332728	0.245275	0.157924
	185.4	0.465623	0.332786	0.245274	0.157891
	185.6	0.465737	0.333197	0.245553	0.158024
	185.8	0.465911	0.333481	0.246078	0.158738
	186	0.46586	0.333666	0.246265	0.158331
	186.2	0.46558	0.333433	0.246134	0.15799
	186.4	0.46564	0.333545	0.246442	0.158093
	186.6	0.46552	0.33339	0.246882	0.158094
	186.8	0.465194	0.333794	0.247281	0.157917
	187	0.465328	0.33365	0.247471	0.15774
	187.2	0.465649	0.333538	0.247565	0.157637
	187.4	0.466366	0.334391	0.24844	0.158243
	187.6	0.466375	0.33453	0.248593	0.15803
	187.8	0.466184	0.335224	0.248659	0.158526
	188	0.466379	0.335584	0.248979	0.158526
	188.2	0.467216	0.335754	0.249015	0.158313
	188.4	0.467865	0.336179	0.249331	0.158871
	188.6	0.468192	0.336518	0.250115	0.15937
	188.8	0.468759	0.336805	0.250444	0.159807
	189	0.469216	0.336812	0.250178	0.159817
	189.2	0.469432	0.336985	0.250169	0.160037
	189.4	0.469847	0.337271	0.250266	0.160296
	189.6	0.46992	0.337151	0.250157	0.160738
	189.8	0.469966	0.336954	0.25013	0.160811
	190	0.470104	0.336919	0.250276	0.160733
	190.2	0.469834	0.336621	0.250017	0.160543
	190.4	0.469545	0.336693	0.250221	0.160467
	190.6	0.46937	0.336647	0.250237	0.160654
	190.8	0.469653	0.336647	0.250563	0.160809
	191	0.470144	0.336579	0.250722	0.160936
	191.2	0.469967	0.336508	0.251119	0.160982
	191.4	0.469936	0.337311	0.251418	0.161136
	191.6	0.469684	0.337392	0.251086	0.160894
	191.8	0.470128	0.337776	0.251422	0.161521
	192	0.470536	0.337721	0.251426	0.161365
	192.2	0.470454	0.337813	0.251417	0.161397
	192.4	0.470761	0.338165	0.251771	0.161581
	192.6	0.470598	0.338377	0.252024	0.161842
	192.8	0.471197	0.338288	0.251804	0.161346
	193	0.471841	0.338396	0.251524	0.161523
	193.2	0.472364	0.338481	0.251224	0.161547
	193.4	0.472994	0.339018	0.251661	0.161563
	193.6	0.473458	0.339015	0.251524	0.161602
	193.8	0.473209	0.338919	0.251309	0.160898
	194	0.473365	0.338873	0.25137	0.160692
	194.2	0.47304	0.338441	0.250843	0.160079
	194.4	0.473652	0.338981	0.251602	0.160109
	194.6	0.473842	0.339397	0.252073	0.160755
	194.8	0.473976	0.339658	0.252236	0.160856
	195	0.474054	0.340356	0.253073	0.161227
	195.2	0.474155	0.341157	0.2537	0.161562
	195.4	0.474026	0.341793	0.25408	0.161638
	195.6	0.474686	0.342504	0.254981	0.162374
	195.8	0.475099	0.34238	0.255658	0.162842
	196	0.475359	0.342733	0.25559	0.163329
	196.2	0.475137	0.343184	0.256035	0.163507
	196.4	0.475689	0.343719	0.256493	0.163609
	196.6	0.476093	0.344493	0.257102	0.164308
	196.8	0.477115	0.344936	0.257351	0.164834
	197	0.4776	0.345391	0.257374	0.165372
	197.2	0.47822	0.345518	0.25761	0.165351
	197.4	0.478647	0.345905	0.257482	0.165806
	197.6	0.478272	0.34526	0.256926	0.166091
	197.8	0.478326	0.344452	0.256415	0.165657
	198	0.479102	0.344854	0.25679	0.16628
	198.2	0.479557	0.344752	0.256881	0.166363
	198.4	0.479742	0.344473	0.257159	0.166586
	198.6	0.479895	0.344267	0.256588	0.166546
	198.8	0.480293	0.344288	0.256078	0.166528
	199	0.480691	0.34405	0.256355	0.166461
	199.2	0.48072	0.34386	0.256063	0.166296
	199.4	0.480327	0.343402	0.255761	0.166076
	199.6	0.481712	0.343749	0.256271	0.166637
	199.8	0.482014	0.343509	0.25657	0.166468
	200	0.482094	0.344019	0.256585	0.166531
	200.2	0.482298	0.344439	0.257163	0.166868
	200.4	0.482309	0.344987	0.257396	0.167287
	200.6	0.483187	0.34571	0.257954	0.167973
	200.8	0.483093	0.345739	0.257519	0.167769
	201	0.483286	0.346463	0.257756	0.167846
	201.2	0.483559	0.346716	0.257765	0.167821
	201.4	0.48332	0.346857	0.257544	0.167518
	201.6	0.482976	0.346578	0.257892	0.167328
	201.8	0.483383	0.347072	0.25801	0.167442
	202	0.483811	0.347934	0.258852	0.16794
	202.2	0.483271	0.347373	0.258857	0.167436
	202.4	0.482814	0.347154	0.258296	0.16716
	202.6	0.483139	0.347631	0.257946	0.167027
	202.8	0.483308	0.347603	0.257766	0.167167
	203	0.483005	0.347656	0.25823	0.167014
	203.2	0.483085	0.347733	0.258462	0.167141
	203.4	0.483833	0.348307	0.259014	0.167772
	203.6	0.484928	0.349384	0.260248	0.168267
	203.8	0.484455	0.349434	0.260746	0.168297
	204	0.484592	0.349807	0.261106	0.168701
	204.2	0.485373	0.349986	0.261561	0.169138
	204.4	0.485058	0.349925	0.261409	0.168885
	204.6	0.485545	0.349784	0.261567	0.168702
	204.8	0.485605	0.350237	0.261518	0.168355
	205	0.48627	0.350904	0.261891	0.168359
	205.2	0.486184	0.350315	0.26183	0.167811
	205.4	0.486267	0.350163	0.262107	0.16757
	205.6	0.486208	0.350285	0.262606	0.168107
	205.8	0.486566	0.350606	0.262665	0.16844
	206	0.486683	0.35048	0.262638	0.168412
	206.2	0.486559	0.350176	0.262395	0.16844
	206.4	0.486391	0.34982	0.261643	0.168213
	206.6	0.48632	0.349439	0.261558	0.168012
	206.8	0.486483	0.349483	0.261692	0.16837
	207	0.486323	0.349611	0.261875	0.168569
	207.2	0.486587	0.349786	0.261776	0.168616
	207.4	0.487226	0.350671	0.261868	0.169176
	207.6	0.487275	0.351031	0.262211	0.16909
	207.8	0.487328	0.350818	0.262377	0.16922
	208	0.487869	0.351334	0.262887	0.169448
	208.2	0.488957	0.351951	0.263452	0.169665
	208.4	0.488481	0.351916	0.263328	0.169152
	208.6	0.48942	0.352802	0.264365	0.169829
	208.8	0.490011	0.353999	0.26523	0.170275
	209	0.490166	0.354423	0.265686	0.170765
	209.2	0.490477	0.355111	0.26634	0.171387
	209.4	0.491206	0.356005	0.26714	0.172071
	209.6	0.491502	0.356602	0.267815	0.172797
	209.8	0.492067	0.357048	0.267526	0.172892
	210	0.492125	0.356761	0.267069	0.17292
	210.2	0.491844	0.356683	0.267128	0.172955
	210.4	0.491291	0.356055	0.266254	0.172307
	210.6	0.491362	0.356026	0.266081	0.172593
	210.8	0.491291	0.355771	0.265495	0.172565
	211	0.491123	0.35545	0.264936	0.172029
	211.2	0.490983	0.354934	0.264107	0.171444
	211.4	0.49191	0.354981	0.263758	0.171606
	211.6	0.492125	0.354804	0.263983	0.171566
	211.8	0.492108	0.354223	0.26398	0.171169
	212	0.492213	0.354183	0.264247	0.170859
	212.2	0.492206	0.354048	0.264228	0.170692
	212.4	0.491455	0.353686	0.264288	0.170343
	212.6	0.492181	0.35417	0.265363	0.171036
	212.8	0.491872	0.35409	0.265238	0.171087
	213	0.492107	0.354638	0.265635	0.171647
	213.2	0.492734	0.355365	0.266201	0.172067
	213.4	0.492651	0.355167	0.266155	0.172523
	213.6	0.492881	0.355061	0.266501	0.172807
	213.8	0.493067	0.355685	0.266851	0.173239
	214	0.493067	0.356038	0.267604	0.173598
	214.2	0.492961	0.356588	0.268205	0.173921
	214.4	0.49301	0.356763	0.268147	0.173868
	214.6	0.493174	0.357019	0.268372	0.173929
	214.8	0.493065	0.357106	0.268244	0.173656
	215	0.493229	0.357138	0.268362	0.173393
	215.2	0.493351	0.356578	0.267962	0.173164
	215.4	0.494023	0.357426	0.268403	0.173316
	215.6	0.494143	0.35752	0.268755	0.173079
	215.8	0.49411	0.357065	0.268438	0.172611
	216	0.495034	0.357289	0.268825	0.17309
	216.2	0.49512	0.357609	0.268665	0.173192
	216.4	0.495569	0.358079	0.268738	0.173446
	216.6	0.496878	0.358884	0.269268	0.173897
	216.8	0.497805	0.359234	0.269345	0.174307
	217	0.498967	0.359668	0.269774	0.174482
	217.2	0.499588	0.359654	0.269579	0.174676
	217.4	0.499979	0.359411	0.269646	0.174755
	217.6	0.500876	0.359662	0.27017	0.174996
	217.8	0.500898	0.360652	0.270824	0.175559
	218	0.500821	0.360881	0.271262	0.175344
	218.2	0.500453	0.3608	0.27108	0.175268
	218.4	0.50065	0.360943	0.271157	0.175335
	218.6	0.500454	0.36074	0.271078	0.175578
	218.8	0.500046	0.360674	0.271009	0.175645
	219	0.499378	0.360315	0.270836	0.175509
	219.2	0.498882	0.360244	0.270332	0.175513
	219.4	0.498513	0.360653	0.270131	0.175489
	219.6	0.498717	0.360524	0.270084	0.175585
	219.8	0.498285	0.360191	0.269738	0.175717
	220	0.498865	0.361077	0.270394	0.176641
	220.2	0.498983	0.361625	0.270309	0.176425
	220.4	0.499086	0.361658	0.270432	0.176442
	220.6	0.499902	0.362288	0.271248	0.176587
	220.8	0.500372	0.362021	0.271158	0.176454
	221	0.500679	0.361875	0.27094	0.175734
	221.2	0.500962	0.362031	0.271155	0.175928
	221.4	0.501203	0.36164	0.271526	0.175592
	221.6	0.501553	0.36209	0.272199	0.175749
	221.8	0.501393	0.36222	0.272703	0.175531
	222	0.501738	0.362122	0.272639	0.175343
	222.2	0.50141	0.361668	0.272481	0.175583
	222.4	0.502263	0.362577	0.273317	0.176577
	222.6	0.501826	0.362923	0.273119	0.176807
	222.8	0.501998	0.363298	0.273423	0.17706
	223	0.502269	0.363705	0.273459	0.177214
	223.2	0.502465	0.364127	0.273523	0.177563
	223.4	0.502899	0.36453	0.273937	0.178086
	223.6	0.503156	0.364996	0.274563	0.178485
	223.8	0.503013	0.364977	0.274114	0.178211
	224	0.503839	0.365412	0.274558	0.178514
	224.2	0.503821	0.365234	0.274296	0.178166
	224.4	0.503585	0.364755	0.274532	0.177988
	224.6	0.504361	0.365623	0.275044	0.178567
	224.8	0.504908	0.365352	0.274873	0.178316
	225	0.505429	0.365299	0.274948	0.178102
	225.2	0.505406	0.36478	0.275145	0.178038
	225.4	0.505771	0.364577	0.275339	0.177766
	225.6	0.506027	0.364934	0.275296	0.177569
	225.8	0.50591	0.364733	0.274723	0.177483
	226	0.505695	0.364587	0.274185	0.177561
	226.2	0.50557	0.364585	0.27431	0.178001
	226.4	0.505574	0.365172	0.274523	0.178068
	226.6	0.50498	0.364986	0.274547	0.177803
	226.8	0.505589	0.365251	0.274998	0.178098
	227	0.505838	0.365705	0.275218	0.178143
	227.2	0.505581	0.365769	0.275201	0.178028
	227.4	0.505987	0.366226	0.275487	0.17819
	227.6	0.506045	0.366168	0.275446	0.178091
	227.8	0.506071	0.366002	0.275129	0.177858
	228	0.506333	0.366151	0.275669	0.178184
	228.2	0.506287	0.366286	0.275968	0.178513
	228.4	0.506897	0.366581	0.276454	0.178865
	228.6	0.507666	0.367412	0.276639	0.17958
	228.8	0.507763	0.367196	0.276529	0.179625
	229	0.508563	0.367645	0.276313	0.180019
	229.2	0.50861	0.367737	0.275735	0.179769
	229.4	0.509552	0.368464	0.275891	0.18031
	229.6	0.509788	0.368568	0.27553	0.180724
	229.8	0.509823	0.368499	0.275559	0.180815
	230	0.510011	0.368699	0.276028	0.181092
	230.2	0.510009	0.368614	0.276752	0.181101
	230.4	0.509643	0.368695	0.277367	0.180906
	230.6	0.510075	0.368997	0.278266	0.181168
	230.8	0.51086	0.369271	0.278478	0.181135
	231	0.511242	0.369351	0.279007	0.181193
	231.2	0.511815	0.369683	0.27974	0.181426
	231.4	0.512607	0.370139	0.280574	0.181794
	231.6	0.513203	0.370298	0.281464	0.182215
	231.8	0.513285	0.370407	0.282043	0.182201
	232	0.513317	0.370546	0.282394	0.182208
	232.2	0.51326	0.370591	0.282434	0.182466
	232.4	0.513547	0.371551	0.28263	0.182737
	232.6	0.513558	0.372017	0.282358	0.182811
	232.8	0.513919	0.37236	0.282137	0.182876
	233	0.514514	0.373035	0.281598	0.182752
	233.2	0.513814	0.373088	0.280931	0.182281
	233.4	0.51386	0.373653	0.281173	0.18233
	233.6	0.513427	0.373525	0.280875	0.18209
	233.8	0.513569	0.374292	0.281041	0.181981
	234	0.51353	0.37496	0.281488	0.18194
	234.2	0.512755	0.37477	0.28136	0.181763
	234.4	0.512722	0.374612	0.280975	0.181679
	234.6	0.512625	0.374554	0.280485	0.181392
	234.8	0.512394	0.374425	0.280226	0.181462
	235	0.512612	0.374611	0.280433	0.181984
	235.2	0.51264	0.375043	0.280473	0.181836
	235.4	0.51289	0.375007	0.280536	0.181612
	235.6	0.513093	0.375111	0.280932	0.181805
	235.8	0.51286	0.374795	0.280506	0.181628
	236	0.51334	0.375002	0.280866	0.18199
	236.2	0.513657	0.374764	0.280554	0.181979
	236.4	0.514086	0.375124	0.280596	0.181912
	236.6	0.514947	0.375062	0.280752	0.182157
	236.8	0.515702	0.374826	0.281105	0.182381
	237	0.515817	0.374863	0.281304	0.182551
	237.2	0.515902	0.374843	0.281785	0.182692
	237.4	0.516401	0.375102	0.282569	0.182873
	237.6	0.51692	0.375287	0.282628	0.183328
	237.8	0.517399	0.375685	0.283015	0.184008
	238	0.517241	0.375084	0.282472	0.183794
	238.2	0.517465	0.374875	0.282255	0.184318
	238.4	0.517866	0.375081	0.28194	0.184556
	238.6	0.51777	0.375323	0.281949	0.184582
	238.8	0.517471	0.375429	0.281909	0.184666
	239	0.517698	0.376102	0.28196	0.185127
	239.2	0.517491	0.376516	0.282052	0.18475
	239.4	0.517289	0.376738	0.282337	0.184683
	239.6	0.51756	0.377297	0.282628	0.184807
	239.8	0.517711	0.377194	0.282311	0.184363
	240	0.51853	0.377499	0.283011	0.184533
	240.2	0.518285	0.377386	0.282703	0.184035
	240.4	0.518255	0.377466	0.283016	0.183907
	240.6	0.518959	0.377865	0.283546	0.184286
	240.8	0.519277	0.377771	0.284208	0.184198
	241	0.5191	0.377755	0.284357	0.183812
	241.2	0.519492	0.377955	0.284967	0.183885
	241.4	0.519564	0.377831	0.284633	0.183744
	241.6	0.519953	0.37836	0.284414	0.184316
	241.8	0.520007	0.378203	0.284452	0.184395
	242	0.520169	0.378043	0.284249	0.184247
	242.2	0.520497	0.378508	0.285007	0.184681
	242.4	0.520344	0.378358	0.284931	0.18463
	242.6	0.52037	0.37793	0.285084	0.184332
	242.8	0.520134	0.378059	0.285211	0.184213
	243	0.520517	0.378507	0.286095	0.184666
	243.2	0.520457	0.378619	0.286486	0.184935
	243.4	0.520149	0.37856	0.286382	0.18464
	243.6	0.52034	0.378459	0.286669	0.184626
	243.8	0.520479	0.378678	0.286997	0.184702
	244	0.520912	0.379416	0.287596	0.18549
	244.2	0.520764	0.379282	0.287614	0.185735
	244.4	0.521107	0.379543	0.288094	0.185941
	244.6	0.522021	0.379967	0.288364	0.186411
	244.8	0.522624	0.379733	0.288828	0.186401
	245	0.522594	0.37976	0.28853	0.18651
	245.2	0.523487	0.380861	0.288972	0.187477
	245.4	0.523884	0.381143	0.289053	0.18769
	245.6	0.524874	0.382093	0.289215	0.188237
	245.8	0.524974	0.381681	0.288921	0.188221
	246	0.525045	0.381677	0.289047	0.188072
	246.2	0.525678	0.381793	0.289183	0.188015
	246.4	0.526243	0.381935	0.289157	0.188287
	246.6	0.526827	0.382269	0.289399	0.188436
	246.8	0.526797	0.382766	0.28964	0.188715
	247	0.526828	0.382899	0.289612	0.188815
	247.2	0.526538	0.383095	0.289671	0.189113
	247.4	0.525936	0.382507	0.289286	0.188461
	247.6	0.525943	0.382781	0.289402	0.18852
	247.8	0.525847	0.383077	0.289594	0.188688
	248	0.526269	0.383188	0.289875	0.188882
	248.2	0.526662	0.382781	0.290205	0.189105
	248.4	0.527165	0.383329	0.290454	0.18903
	248.6	0.527628	0.383756	0.290697	0.189702
	248.8	0.527841	0.383764	0.290773	0.189583
	249	0.527882	0.384503	0.291673	0.189978
	249.2	0.528489	0.385178	0.292054	0.190285
	249.4	0.528391	0.385194	0.29236	0.189733
	249.6	0.528808	0.385431	0.292103	0.189628
	249.8	0.528597	0.385237	0.292108	0.189798
	250	0.528689	0.385751	0.292644	0.189929
	250.2	0.529377	0.38657	0.293357	0.190277
	250.4	0.529625	0.387267	0.293711	0.190986
	250.6	0.529783	0.387393	0.293959	0.19084
	250.8	0.530048	0.387941	0.294203	0.191069
	251	0.530061	0.387767	0.29427	0.190812
	251.2	0.530115	0.388282	0.294762	0.191041
	251.4	0.529518	0.387879	0.294199	0.190604
	251.6	0.529489	0.388148	0.293883	0.190582
	251.8	0.529122	0.387406	0.293424	0.190311
	252	0.529575	0.387462	0.293103	0.190646
	252.2	0.529737	0.387603	0.292956	0.190747
	252.4	0.529822	0.388399	0.29254	0.190928
	252.6	0.529594	0.388405	0.292269	0.191227
	252.8	0.52979	0.38819	0.292152	0.190979
	253	0.529977	0.388425	0.292605	0.191201
	253.2	0.529955	0.388164	0.291565	0.190725
	253.4	0.52992	0.388145	0.291764	0.190622
	253.6	0.530352	0.387822	0.29147	0.190872
	253.8	0.530653	0.387748	0.291714	0.19139
	254	0.531153	0.387592	0.292155	0.191798
	254.2	0.531799	0.388012	0.292657	0.191737
	254.4	0.53233	0.388009	0.293139	0.192094
	254.6	0.532599	0.387961	0.29367	0.192241
	254.8	0.53274	0.388025	0.29358	0.192425
	255	0.532628	0.388112	0.294247	0.192607
	255.2	0.532063	0.388163	0.29412	0.192371
	255.4	0.531587	0.387689	0.29427	0.192455
	255.6	0.531408	0.38767	0.294055	0.192571
	255.8	0.531571	0.387501	0.294152	0.192432
	256	0.531894	0.388204	0.294285	0.192794
	256.2	0.532373	0.389117	0.294645	0.192856
	256.4	0.532166	0.38911	0.294332	0.192631
	256.6	0.53242	0.389263	0.294368	0.192473
	256.8	0.532845	0.389732	0.294991	0.192297
	257	0.53357	0.389904	0.294743	0.192235
	257.2	0.534214	0.39035	0.294364	0.191992
	257.4	0.535029	0.390943	0.295	0.192217
	257.6	0.535629	0.391521	0.295338	0.192719
	257.8	0.535787	0.391713	0.295494	0.193056
	258	0.536623	0.391961	0.295759	0.193454
	258.2	0.536468	0.392136	0.295874	0.193359
	258.4	0.536281	0.392265	0.296093	0.193963
	258.6	0.536193	0.392395	0.295871	0.194537
	258.8	0.535785	0.391955	0.295772	0.194629
	259	0.535306	0.391597	0.295978	0.194843
	259.2	0.534542	0.390852	0.295503	0.194577
	259.4	0.534227	0.390704	0.295297	0.194722
	259.6	0.534679	0.390967	0.295479	0.195227
	259.8	0.535397	0.391243	0.295909	0.19559
	260	0.535299	0.391177	0.295572	0.195784
	260.2	0.535525	0.391083	0.29589	0.195667
	260.4	0.53563	0.39092	0.296119	0.195424
	260.6	0.536505	0.391869	0.296281	0.195574
	260.8	0.537249	0.392314	0.296763	0.19561
	261	0.538196	0.392612	0.29648	0.195714
	261.2	0.538494	0.393538	0.29652	0.195734
	261.4	0.539293	0.39458	0.29704	0.195992
	261.6	0.539994	0.395456	0.29785	0.196635
	261.8	0.540697	0.395709	0.298232	0.196581
	262	0.541284	0.396101	0.298788	0.196563
	262.2	0.541501	0.39642	0.299034	0.197264
	262.4	0.541134	0.396778	0.299362	0.197789
	262.6	0.541412	0.396911	0.299644	0.197823
	262.8	0.541055	0.396615	0.300134	0.197337
	263	0.540942	0.396481	0.300108	0.197077
	263.2	0.540746	0.396462	0.300361	0.196661
	263.4	0.540929	0.396935	0.300592	0.197018
	263.6	0.541544	0.397385	0.301428	0.197574
	263.8	0.541266	0.397369	0.301254	0.197675
	264	0.540692	0.397098	0.300734	0.197561
	264.2	0.541024	0.397475	0.301109	0.19738
	264.4	0.541018	0.397793	0.301182	0.197285
	264.6	0.541059	0.39802	0.300715	0.1976
	264.8	0.54043	0.397622	0.300542	0.197202
	265	0.540402	0.397917	0.3005	0.197242
	265.2	0.54058	0.398464	0.300644	0.197406
	265.4	0.541589	0.399219	0.301221	0.19745
	265.6	0.54256	0.399538	0.301891	0.197866
	265.8	0.543241	0.399185	0.302079	0.197739
	266	0.543387	0.399388	0.302154	0.198235
	266.2	0.544205	0.399674	0.302524	0.198828
	266.4	0.543913	0.399458	0.302685	0.198445
	266.6	0.544727	0.399646	0.303347	0.19844
	266.8	0.544904	0.399561	0.303731	0.198428
	267	0.545368	0.399508	0.304008	0.198569
	267.2	0.544842	0.399011	0.303951	0.198552
	267.4	0.544949	0.399498	0.304256	0.199436
	267.6	0.544768	0.3996	0.304161	0.199438
	267.8	0.543874	0.399182	0.303396	0.199274
	268	0.543643	0.398978	0.302882	0.198857
	268.2	0.543399	0.39874	0.302793	0.19863
	268.4	0.543015	0.398498	0.302391	0.198733
	268.6	0.542577	0.398452	0.301942	0.198511
	268.8	0.542726	0.398776	0.30238	0.198308
	269	0.543981	0.399617	0.302862	0.199073
	269.2	0.544767	0.400218	0.303165	0.199344
	269.4	0.545538	0.400439	0.303427	0.199216
	269.6	0.54646	0.40062	0.303668	0.199968
	269.8	0.54707	0.401119	0.303511	0.200166
	270	0.547436	0.401799	0.303368	0.20039
	270.2	0.548123	0.402097	0.303384	0.200421
	270.4	0.548126	0.402609	0.303814	0.200852
	270.6	0.548526	0.403141	0.304133	0.200984
	270.8	0.548995	0.402958	0.304188	0.201091
	271	0.54905	0.403015	0.304822	0.201307
	271.2	0.548586	0.403073	0.304903	0.201238
	271.4	0.548666	0.40383	0.305252	0.201522
	271.6	0.548356	0.403762	0.30551	0.20125
	271.8	0.548192	0.403233	0.305719	0.200771
	272	0.548313	0.40271	0.306042	0.200696
	272.2	0.547712	0.40224	0.306103	0.20066
	272.4	0.547599	0.402214	0.306254	0.200927
	272.6	0.547597	0.401614	0.306352	0.200624
	272.8	0.548323	0.401999	0.306961	0.201232
	273	0.548503	0.402216	0.307185	0.201499
	273.2	0.548434	0.402447	0.307375	0.201364
	273.4	0.548682	0.402696	0.307412	0.201216
	273.6	0.549351	0.403059	0.307102	0.201563
	273.8	0.549458	0.403893	0.306675	0.201591
	274	0.549766	0.404062	0.306882	0.201813
	274.2	0.550173	0.404649	0.307024	0.202216
	274.4	0.550413	0.40537	0.307174	0.202326
	274.6	0.550544	0.405518	0.306734	0.201576
	274.8	0.550596	0.405483	0.30621	0.201474
	275	0.550676	0.406027	0.306127	0.20096
	275.2	0.551016	0.40676	0.30604	0.200851
	275.4	0.551083	0.407148	0.306022	0.201114
	275.6	0.551567	0.4073	0.306686	0.20122
	275.8	0.552126	0.407374	0.307121	0.201249
	276	0.552456	0.407282	0.307136	0.201471
	276.2	0.55188	0.407084	0.306931	0.201627
	276.4	0.552005	0.406806	0.307124	0.20201
	276.6	0.552464	0.406461	0.30721	0.202047
	276.8	0.552455	0.40656	0.307543	0.202319
	277	0.552446	0.40635	0.307879	0.20249
	277.2	0.55298	0.406484	0.308502	0.202575
	277.4	0.553445	0.406302	0.308877	0.202545
	277.6	0.553804	0.405653	0.309081	0.202369
	277.8	0.553804	0.405705	0.309304	0.20265
	278	0.554106	0.40541	0.310008	0.20323
	278.2	0.554839	0.405949	0.310505	0.203911
	278.4	0.554933	0.406046	0.310191	0.203557
	278.6	0.555177	0.406297	0.309994	0.203427
	278.8	0.555491	0.406602	0.309232	0.203582
	279	0.556141	0.407235	0.309531	0.20381
	279.2	0.556372	0.407795	0.309606	0.204221
	279.4	0.556514	0.408398	0.309885	0.204381
	279.6	0.556359	0.408736	0.309789	0.204273
	279.8	0.556783	0.409295	0.309702	0.204562
	280	0.556577	0.409759	0.309652	0.204759
	280.2	0.556315	0.410224	0.309814	0.205182
	280.4	0.556836	0.410466	0.309822	0.205463
	280.6	0.557022	0.410721	0.310158	0.205424
	280.8	0.556924	0.410479	0.310006	0.205252
	281	0.556724	0.410281	0.310023	0.205333
	281.2	0.556679	0.410377	0.310422	0.205216
	281.4	0.556506	0.410022	0.310095	0.204984
	281.6	0.556285	0.409929	0.310343	0.205066
	281.8	0.5564	0.410206	0.311031	0.20539
	282	0.55631	0.409994	0.31183	0.20598
	282.2	0.556946	0.410349	0.312167	0.206402
	282.4	0.556576	0.409968	0.311863	0.205913
	282.6	0.556814	0.410132	0.311847	0.206214
	282.8	0.556736	0.409995	0.311966	0.206409
	283	0.557885	0.410839	0.313208	0.207166
	283.2	0.557672	0.410713	0.313052	0.206958
	283.4	0.557917	0.411041	0.313467	0.207351
	283.6	0.55756	0.411035	0.313647	0.207127
	283.8	0.558304	0.411504	0.314362	0.207373
	284	0.55823	0.411823	0.314569	0.207283
	284.2	0.559011	0.41204	0.314763	0.207394
	284.4	0.55938	0.411899	0.314491	0.207199
	284.6	0.559439	0.412	0.314535	0.207012
	284.8	0.559695	0.412114	0.314053	0.207237
	285	0.559449	0.412146	0.314098	0.207534
	285.2	0.559621	0.412541	0.313965	0.2077
	285.4	0.559624	0.412547	0.313345	0.207446
	285.6	0.559719	0.412934	0.313495	0.207443
	285.8	0.559952	0.412913	0.31339	0.207
	286	0.559592	0.412518	0.313286	0.20726
	286.2	0.559987	0.412732	0.313473	0.207312
	286.4	0.559972	0.412599	0.31368	0.20709
	286.6	0.560431	0.413114	0.313778	0.20755
	286.8	0.560773	0.413445	0.31436	0.207807
	287	0.561526	0.413803	0.315064	0.207789
	287.2	0.561093	0.41343	0.315234	0.207781
	287.4	0.561628	0.413721	0.315844	0.20779
	287.6	0.561123	0.413492	0.316132	0.207244
	287.8	0.561474	0.413629	0.316212	0.207467
	288	0.561387	0.413352	0.315999	0.206989
	288.2	0.561688	0.413158	0.315898	0.206733
	288.4	0.562146	0.413281	0.315959	0.206652
	288.6	0.562581	0.413699	0.31639	0.207094
	288.8	0.562654	0.413962	0.316415	0.207479
	289	0.562943	0.414201	0.316543	0.207722
	289.2	0.563258	0.41471	0.316382	0.208159
	289.4	0.56355	0.415093	0.316366	0.208239
	289.6	0.564252	0.415747	0.316704	0.208803
	289.8	0.564409	0.415755	0.316742	0.208903
	290	0.564626	0.41559	0.317243	0.209158
	290.2	0.565049	0.416081	0.317466	0.209348
	290.4	0.564754	0.415893	0.317244	0.2091
	290.6	0.565274	0.416163	0.317309	0.20933
	290.8	0.565116	0.416151	0.317741	0.208972
	291	0.56516	0.415757	0.318104	0.208893
	291.2	0.564896	0.415493	0.318025	0.208942
	291.4	0.565113	0.415826	0.317847	0.208862
	291.6	0.564966	0.415911	0.318104	0.209176
	291.8	0.565747	0.416097	0.318369	0.209419
	292	0.565814	0.415901	0.318496	0.209054
	292.2	0.56609	0.415993	0.318552	0.209124
	292.4	0.566532	0.416383	0.319235	0.209516
	292.6	0.567004	0.416842	0.319914	0.210348
	292.8	0.567767	0.417595	0.32076	0.211426
	293	0.568448	0.418282	0.321277	0.212256
	293.2	0.568586	0.418945	0.321293	0.212963
	293.4	0.569025	0.419539	0.321507	0.213296
	293.6	0.56985	0.420213	0.32142	0.213695
	293.8	0.569824	0.420247	0.32131	0.213914
	294	0.569638	0.420055	0.321315	0.213663
	294.2	0.569644	0.420321	0.321237	0.213763
	294.4	0.56974	0.419874	0.320981	0.213498
	294.6	0.570056	0.420028	0.320831	0.213218
	294.8	0.569349	0.419943	0.320366	0.212873
	295	0.569077	0.419599	0.319544	0.212544
	295.2	0.568761	0.419619	0.31912	0.212448
	295.4	0.568839	0.420025	0.31909	0.212629
	295.6	0.568698	0.419801	0.318888	0.212331
	295.8	0.568403	0.419771	0.318996	0.211701
	296	0.567827	0.419456	0.318849	0.211156
	296.2	0.568113	0.419901	0.319538	0.211322
	296.4	0.568651	0.420397	0.320796	0.211636
	296.6	0.569047	0.42071	0.321161	0.211954
	296.8	0.569366	0.420672	0.32118	0.211944
	297	0.569011	0.420157	0.320604	0.211447
	297.2	0.569317	0.420596	0.320717	0.211488
	297.4	0.5702	0.421177	0.321487	0.212165
	297.6	0.570309	0.42119	0.321543	0.212337
	297.8	0.570035	0.420956	0.321639	0.212692
	298	0.570259	0.421336	0.322168	0.212817
	298.2	0.571503	0.42194	0.322521	0.213406
	298.4	0.571868	0.422123	0.322697	0.213688
	298.6	0.572231	0.422351	0.322667	0.213651
	298.8	0.572201	0.422505	0.322776	0.21401
	299	0.572396	0.422259	0.322604	0.213937
	299.2	0.572766	0.422461	0.322957	0.214107
	299.4	0.573032	0.422526	0.322954	0.214278
	299.6	0.572842	0.422411	0.322747	0.213621
	299.8	0.572454	0.42255	0.323238	0.213313
	300	0.572546	0.422458	0.323098	0.213269
	300.2	0.573029	0.422899	0.323752	0.213167
	300.4	0.57302	0.422826	0.323954	0.212734
	300.6	0.572605	0.4228	0.323561	0.212146
	300.8	0.572592	0.422485	0.323388	0.211529
	301	0.573063	0.42264	0.323685	0.211566
	301.2	0.572996	0.423265	0.323547	0.21166
	301.4	0.57295	0.423684	0.323589	0.211942
	301.6	0.572853	0.42393	0.323234	0.211908
	301.8	0.573241	0.424537	0.32303	0.212423
	302	0.573324	0.425074	0.323195	0.212641
	302.2	0.573941	0.425758	0.323774	0.212972
	302.4	0.573501	0.425298	0.32379	0.21299
	302.6	0.573408	0.424775	0.323519	0.212802
	302.8	0.573042	0.424675	0.323525	0.213429
	303	0.573818	0.424685	0.323738	0.214346
	303.2	0.573938	0.424611	0.323886	0.214864
	303.4	0.57323	0.423915	0.323582	0.214896
	303.6	0.573074	0.423753	0.32414	0.215003
	303.8	0.573248	0.423819	0.324735	0.215773
	304	0.573652	0.423885	0.324892	0.216279
	304.2	0.574124	0.424276	0.325184	0.216378
	304.4	0.574497	0.424525	0.325675	0.216702
	304.6	0.574673	0.424858	0.325988	0.216361
	304.8	0.575116	0.424552	0.326181	0.21633
	305	0.575511	0.424444	0.326087	0.216432
	305.2	0.575108	0.424358	0.325562	0.216122
	305.4	0.575915	0.425022	0.326354	0.216805
	305.6	0.57634	0.425595	0.326367	0.216751
	305.8	0.576516	0.426557	0.326584	0.217106
	306	0.577024	0.427243	0.327224	0.217279
	306.2	0.577333	0.42797	0.32762	0.217256
	306.4	0.577627	0.427831	0.327508	0.217227
	306.6	0.577882	0.427956	0.327586	0.217423
	306.8	0.57847	0.428715	0.328137	0.218312
	307	0.578724	0.428749	0.32832	0.218432
	307.2	0.578312	0.428828	0.328376	0.21807
	307.4	0.578162	0.429148	0.328546	0.217767
	307.6	0.578876	0.429947	0.328996	0.218534
	307.8	0.579407	0.429943	0.328486	0.218485
	308	0.579764	0.429946	0.328522	0.218115
	308.2	0.57975	0.429948	0.328252	0.217674
	308.4	0.579825	0.429781	0.328483	0.217703
	308.6	0.57975	0.429918	0.328741	0.217463
	308.8	0.579686	0.429599	0.328999	0.2172
	309	0.579644	0.429643	0.329254	0.217011
	309.2	0.579949	0.430133	0.329745	0.216938
	309.4	0.580546	0.430959	0.330908	0.217699
	309.6	0.580678	0.431198	0.331213	0.217571
	309.8	0.580956	0.431815	0.331529	0.218469
	310	0.581322	0.431438	0.331512	0.218072
	310.2	0.580759	0.431136	0.331152	0.217736
	310.4	0.581774	0.431163	0.331635	0.218441
	310.6	0.581366	0.430845	0.331068	0.218804
	310.8	0.581146	0.431047	0.330868	0.219211
	311	0.581139	0.430991	0.330654	0.219414
	311.2	0.581055	0.431353	0.330428	0.219583
	311.4	0.581331	0.431285	0.330443	0.219685
	311.6	0.581805	0.431525	0.330168	0.220308
	311.8	0.582131	0.43118	0.330034	0.21998
	312	0.5819	0.431118	0.330064	0.22003
	312.2	0.58157	0.431001	0.329567	0.220052
	312.4	0.582179	0.43132	0.330209	0.220586
	312.6	0.582806	0.431446	0.330627	0.220723
	312.8	0.583209	0.431655	0.331138	0.220614
	313	0.583914	0.432276	0.33157	0.220706
	313.2	0.584015	0.432313	0.331601	0.220247
	313.4	0.584421	0.432417	0.332169	0.220501
	313.6	0.584332	0.432513	0.33246	0.220272
	313.8	0.584192	0.432698	0.332288	0.220025
	314	0.584393	0.432354	0.332392	0.219388
	314.2	0.58472	0.432464	0.332688	0.219589
	314.4	0.58549	0.433312	0.333121	0.220249
	314.6	0.585445	0.43382	0.332857	0.220226
	314.8	0.58575	0.43437	0.333218	0.220473
	315	0.586682	0.434783	0.333836	0.220366
	315.2	0.586863	0.435121	0.33393	0.220687
	315.4	0.586848	0.435211	0.334193	0.221101
	315.6	0.58699	0.43586	0.334029	0.221566
	315.8	0.58667	0.435578	0.333828	0.221196
	316	0.586466	0.435188	0.333358	0.2216
	316.2	0.58681	0.435015	0.333342	0.222142
	316.4	0.587199	0.434992	0.333863	0.222885
	316.6	0.587055	0.434911	0.333484	0.22331
	316.8	0.586735	0.434915	0.333195	0.223057
	317	0.587018	0.43528	0.333285	0.223348
	317.2	0.586638	0.435201	0.3328	0.223235
	317.4	0.587226	0.435402	0.333398	0.223531
	317.6	0.587002	0.435674	0.333499	0.223308
	317.8	0.587317	0.435492	0.333584	0.223205
	318	0.587256	0.435281	0.333158	0.222576
	318.2	0.587832	0.435564	0.333308	0.222479
	318.4	0.588236	0.436582	0.333636	0.222619
	318.6	0.589054	0.43691	0.333911	0.222453
	318.8	0.58912	0.437017	0.33411	0.222219
	319	0.589342	0.437138	0.334306	0.222187
	319.2	0.589018	0.436766	0.333682	0.222274
	319.4	0.589133	0.436602	0.333575	0.222078
	319.6	0.589495	0.436801	0.333676	0.222408
	319.8	0.589574	0.436654	0.333558	0.222215
	320	0.589625	0.436127	0.33309	0.222393
	320.2	0.589827	0.436551	0.333401	0.222667
	320.4	0.589731	0.436553	0.333488	0.222413
	320.6	0.589249	0.436529	0.333088	0.222273
	320.8	0.589583	0.436981	0.333554	0.22214
	321	0.589792	0.437152	0.334182	0.222084
	321.2	0.589639	0.43703	0.334165	0.221492
	321.4	0.589828	0.436914	0.3349	0.221523
	321.6	0.590081	0.437315	0.335426	0.221778
	321.8	0.590791	0.437344	0.336102	0.221985
	322	0.590874	0.437543	0.336083	0.221635
	322.2	0.59194	0.438463	0.336841	0.22264
	322.4	0.591944	0.439525	0.337213	0.223147
	322.6	0.592337	0.440044	0.33741	0.223304
	322.8	0.592198	0.440287	0.337621	0.223574
	323	0.592668	0.440958	0.33767	0.224009
	323.2	0.593328	0.441461	0.337719	0.224582
	323.4	0.593798	0.442233	0.338264	0.225177
	323.6	0.593732	0.442425	0.33826	0.226012
	323.8	0.594409	0.443	0.338376	0.226296
	324	0.594607	0.44316	0.338413	0.226454
	324.2	0.595029	0.443707	0.338677	0.226649
	324.4	0.594657	0.443294	0.338378	0.226319
	324.6	0.59412	0.44288	0.337969	0.225867
	324.8	0.59377	0.442549	0.337771	0.225237
	325	0.593388	0.441812	0.337762	0.224733
	325.2	0.593713	0.441782	0.338157	0.22488
	325.4	0.594277	0.441898	0.338682	0.225625
	325.6	0.595083	0.441998	0.339339	0.225908
	325.8	0.595106	0.441438	0.339161	0.225528
	326	0.595283	0.441564	0.339114	0.225263
	326.2	0.595756	0.442031	0.33925	0.225843
	326.4	0.595088	0.441708	0.339067	0.225023
	326.6	0.595163	0.441514	0.339006	0.224827
	326.8	0.595279	0.44192	0.339486	0.22498
	327	0.595375	0.442331	0.339678	0.225144
	327.2	0.595857	0.442335	0.340191	0.225581
	327.4	0.59589	0.442342	0.340557	0.2261
	327.6	0.596582	0.44289	0.340854	0.226802
	327.8	0.596867	0.442958	0.340594	0.226985
	328	0.597351	0.4431	0.340976	0.227127
	328.2	0.597287	0.443051	0.340913	0.227136
	328.4	0.597064	0.443163	0.340699	0.227269
	328.6	0.597583	0.44381	0.340909	0.22749
	328.8	0.597373	0.443915	0.340378	0.227382
	329	0.598244	0.444467	0.340891	0.22769
	329.2	0.598798	0.444939	0.341358	0.228001
	329.4	0.598624	0.445319	0.341255	0.228086
	329.6	0.598369	0.445005	0.34079	0.227566
	329.8	0.598525	0.444673	0.340965	0.227095
	330	0.598721	0.44484	0.341207	0.226925
	330.2	0.598623	0.444535	0.341215	0.227017
	330.4	0.597895	0.443888	0.34112	0.226457
	330.6	0.597845	0.444185	0.341468	0.226671
	330.8	0.598642	0.44459	0.342342	0.226577
	331	0.598944	0.444514	0.342858	0.22659
	331.2	0.599667	0.445003	0.34365	0.227202
	331.4	0.599259	0.444768	0.3432	0.227329
	331.6	0.599555	0.444909	0.343058	0.227514
	331.8	0.599589	0.444516	0.342523	0.227796
	332	0.599807	0.444921	0.342872	0.228104
	332.2	0.599767	0.444874	0.342759	0.228
	332.4	0.599487	0.4452	0.342476	0.228434
	332.6	0.599706	0.445208	0.342369	0.228518
	332.8	0.599678	0.445073	0.34207	0.228419
	333	0.599872	0.445276	0.342156	0.228494
	333.2	0.599661	0.445475	0.342211	0.228729
	333.4	0.599595	0.445852	0.342191	0.228568
	333.6	0.600208	0.445485	0.342239	0.2286
	333.8	0.600943	0.445762	0.343278	0.228786
	334	0.601013	0.445842	0.343355	0.228749
	334.2	0.601576	0.446172	0.343666	0.22892
	334.4	0.602173	0.446829	0.344091	0.229136
	334.6	0.602633	0.447143	0.344688	0.228922
	334.8	0.603545	0.447322	0.345185	0.228757
	335	0.603841	0.447859	0.34557	0.229522
	335.2	0.604262	0.448063	0.345589	0.230054
	335.4	0.604016	0.447942	0.344827	0.229739
	335.6	0.604294	0.44836	0.345051	0.229662
	335.8	0.605047	0.448789	0.34501	0.230034
	336	0.604704	0.44903	0.344718	0.229797
	336.2	0.604289	0.449054	0.344603	0.229377
	336.4	0.603786	0.448843	0.344494	0.229754
	336.6	0.604121	0.44867	0.344704	0.229881
	336.8	0.604274	0.449118	0.344915	0.230092
	337	0.604186	0.449396	0.344991	0.230303
	337.2	0.60385	0.449214	0.345022	0.230581
	337.4	0.603804	0.449083	0.345182	0.230287
	337.6	0.603935	0.448841	0.345298	0.230275
	337.8	0.604132	0.449285	0.345559	0.230268
	338	0.604433	0.449274	0.345768	0.230076
	338.2	0.604804	0.449604	0.346245	0.230143
	338.4	0.605107	0.449516	0.346571	0.230163
	338.6	0.60483	0.44876	0.346355	0.229821
	338.8	0.605481	0.448743	0.346658	0.230234
	339	0.605452	0.449063	0.346892	0.230656
	339.2	0.606226	0.449511	0.347119	0.230974
	339.4	0.606402	0.450271	0.347684	0.230955
	339.6	0.606859	0.450605	0.348075	0.230968
	339.8	0.607721	0.451133	0.348364	0.232013
	340	0.607584	0.451437	0.348235	0.232051
	340.2	0.607169	0.451634	0.348424	0.232319
	340.4	0.607431	0.451702	0.348682	0.232829
	340.6	0.607164	0.451501	0.348531	0.232815
	340.8	0.606747	0.451169	0.348054	0.232287
	341	0.606273	0.451333	0.348196	0.232428
	341.2	0.605818	0.45129	0.34808	0.232336
	341.4	0.606088	0.451973	0.348431	0.232295
	341.6	0.606345	0.452471	0.348015	0.231991
	341.8	0.606464	0.452961	0.348038	0.231842
	342	0.606841	0.453336	0.348623	0.231755
	342.2	0.606708	0.453599	0.348378	0.231707
	342.4	0.606749	0.453556	0.348185	0.231547
	342.6	0.606665	0.453228	0.347722	0.231353
	342.8	0.607199	0.453427	0.348167	0.231682
	343	0.60699	0.453249	0.347907	0.231451
	343.2	0.607573	0.453409	0.347792	0.231966
	343.4	0.607602	0.453681	0.347705	0.231701
	343.6	0.607711	0.453554	0.347507	0.232108
	343.8	0.607984	0.453594	0.347757	0.232464
	344	0.607838	0.45331	0.347662	0.232091
	344.2	0.607895	0.453172	0.347931	0.232266
	344.4	0.60798	0.452461	0.347571	0.231493
	344.6	0.607686	0.452065	0.347816	0.231173
	344.8	0.607908	0.452195	0.34777	0.230937
	345	0.607897	0.452794	0.348272	0.231399
	345.2	0.60795	0.452847	0.348557	0.23132
	345.4	0.608031	0.453176	0.348654	0.231369
	345.6	0.60853	0.453593	0.348849	0.231485
	345.8	0.608931	0.454176	0.34965	0.232205
	346	0.609563	0.454659	0.350309	0.232454
	346.2	0.609719	0.454301	0.3503	0.232517
	346.4	0.610331	0.454356	0.350699	0.232688
	346.6	0.610737	0.454465	0.351003	0.232817
	346.8	0.611423	0.454967	0.351512	0.233247
	347	0.612135	0.45523	0.3517	0.233686
	347.2	0.612637	0.456025	0.351668	0.234366
	347.4	0.613307	0.456863	0.351895	0.234636
	347.6	0.614014	0.457542	0.352533	0.235319
	347.8	0.614398	0.457857	0.352643	0.235131
	348	0.614875	0.457706	0.352435	0.235311
	348.2	0.615546	0.458224	0.352277	0.235735
	348.4	0.615082	0.458099	0.351269	0.235134
	348.6	0.614239	0.458096	0.350881	0.234809
	348.8	0.613796	0.457609	0.350116	0.234581
	349	0.612983	0.457341	0.350162	0.234645
	349.2	0.612783	0.456927	0.350339	0.234559
	349.4	0.612667	0.456943	0.350657	0.234927
	349.6	0.613425	0.457185	0.35129	0.235512
	349.8	0.61312	0.456856	0.351473	0.23581
	350	0.613347	0.456697	0.352262	0.236033
	350.2	0.613533	0.456483	0.352618	0.235966
	350.4	0.613655	0.456741	0.353033	0.236233
	350.6	0.614017	0.457106	0.353734	0.236475
	350.8	0.614466	0.457329	0.354128	0.236795
	351	0.615046	0.457698	0.354707	0.237425
	351.2	0.61545	0.458119	0.354499	0.237521
	351.4	0.615972	0.459053	0.355202	0.237673
	351.6	0.616619	0.4596	0.355405	0.237542
	351.8	0.616928	0.459548	0.354995	0.237618
	352	0.617274	0.459487	0.354598	0.237613
	352.2	0.616908	0.459511	0.353812	0.236866
	352.4	0.616462	0.45909	0.353587	0.235832
	352.6	0.616421	0.458989	0.3536	0.23514
	352.8	0.616677	0.459128	0.353797	0.235064
	353	0.616553	0.459129	0.353857	0.235178
	353.2	0.617336	0.45953	0.354152	0.235442
	353.4	0.617184	0.45938	0.353924	0.235478
	353.6	0.617856	0.459624	0.35442	0.236178
	353.8	0.617673	0.459551	0.354668	0.236588
	354	0.618193	0.459758	0.355052	0.236617
	354.2	0.618275	0.460012	0.355159	0.23646
	354.4	0.618074	0.460095	0.355328	0.23675
	354.6	0.618233	0.460331	0.355458	0.237095
	354.8	0.618315	0.460734	0.355868	0.237669
	355	0.618435	0.461191	0.356122	0.238156
	355.2	0.618288	0.461078	0.355785	0.23811
	355.4	0.618548	0.461896	0.356893	0.238885
	355.6	0.618371	0.461477	0.356727	0.238916
	355.8	0.61864	0.461542	0.356943	0.239317
	356	0.618793	0.461953	0.357513	0.239437
	356.2	0.61884	0.461931	0.357523	0.239256
	356.4	0.619278	0.462028	0.358064	0.239319
	356.6	0.619102	0.46213	0.357924	0.239257
	356.8	0.619175	0.462397	0.357956	0.239292
	357	0.619825	0.462908	0.358259	0.239969
	357.2	0.620872	0.463685	0.358484	0.240337
	357.4	0.620808	0.463549	0.358092	0.240057
	357.6	0.621514	0.463957	0.358471	0.240365
	357.8	0.621949	0.463972	0.358269	0.240138
	358	0.62249	0.464227	0.358223	0.239829
	358.2	0.622664	0.464495	0.358401	0.239822
	358.4	0.622738	0.464596	0.35833	0.23977
	358.6	0.622863	0.464661	0.35809	0.239798
	358.8	0.622699	0.464817	0.358065	0.23978
	359	0.622337	0.464613	0.357744	0.239539
	359.2	0.622002	0.464403	0.357637	0.239423
	359.4	0.622019	0.46476	0.358042	0.239674
	359.6	0.621351	0.464413	0.357691	0.239297
	359.8	0.621351	0.464727	0.35782	0.239347
	360.01	0.621351	0.464727	0.35782	0.239347
	360.21	0.611055	0.45779	0.353097	0.237352
	360.41	0.599938	0.450343	0.348541	0.23492
	360.61	0.588144	0.442347	0.343559	0.232144
	360.81	0.57654	0.434699	0.338928	0.229536
	361.01	0.564916	0.426506	0.334183	0.226836
	361.21	0.553471	0.419147	0.329657	0.224404
	361.41	0.543147	0.412203	0.325198	0.221842
	361.61	0.534195	0.406157	0.321683	0.219654
	361.81	0.527322	0.401317	0.318915	0.218231
	362.01	0.522255	0.397762	0.317231	0.216776
	362.21	0.520212	0.396459	0.31658	0.216302
	362.41	0.518221	0.395054	0.315075	0.215932
	362.61	0.516612	0.39379	0.314218	0.215741
	362.81	0.514608	0.392446	0.313333	0.215048
	363.01	0.51369	0.391553	0.312632	0.214901
	363.21	0.513235	0.391202	0.312189	0.215316
	363.41	0.511747	0.390369	0.311099	0.214611
	363.61	0.51031	0.389649	0.310459	0.214405
	363.81	0.509326	0.388726	0.309158	0.213958
	364.01	0.508926	0.388114	0.308551	0.213801
	364.21	0.508001	0.387432	0.307958	0.213589
	364.41	0.507256	0.386812	0.30745	0.212674
	364.61	0.506354	0.385859	0.306603	0.211884
	364.81	0.505595	0.385277	0.306529	0.211325
	365.01	0.505001	0.384746	0.30624	0.211302
	365.21	0.504113	0.384338	0.305431	0.210961
	365.41	0.503829	0.383782	0.304979	0.210157
	365.61	0.503221	0.383139	0.304743	0.209538
	365.81	0.502655	0.382213	0.304524	0.209079
	366.01	0.50137	0.381265	0.304042	0.208124
	366.21	0.500869	0.380985	0.3038	0.207794
	366.41	0.500197	0.380547	0.303881	0.207438
	366.61	0.499695	0.380024	0.304337	0.207433
	366.81	0.49906	0.37969	0.304663	0.207575
	367.01	0.499019	0.379621	0.304685	0.207766
	367.21	0.498574	0.379576	0.304802	0.208013
	367.41	0.497115	0.378852	0.304416	0.207688
	367.61	0.496414	0.37855	0.303979	0.207703
	367.81	0.496058	0.378577	0.303703	0.207897
	368.01	0.495642	0.378445	0.303631	0.20809
	368.21	0.494867	0.37835	0.303189	0.208073
	368.41	0.494466	0.377819	0.302277	0.207971
	368.61	0.49368	0.37728	0.301534	0.207821
	368.81	0.493827	0.377419	0.301639	0.208093
	369.01	0.494098	0.377818	0.30122	0.208389
	369.21	0.493965	0.377457	0.300839	0.208273
	369.41	0.493829	0.377422	0.300942	0.208125
	369.61	0.493617	0.376993	0.300751	0.207945
	369.81	0.492967	0.376386	0.300258	0.20745
	370.01	0.492118	0.375732	0.299968	0.206772
	370.21	0.492185	0.375826	0.299952	0.206654
	370.41	0.492071	0.375574	0.300297	0.20644
	370.61	0.49175	0.375493	0.300406	0.206388
	370.81	0.491634	0.375498	0.300023	0.206197
	371.01	0.491321	0.375155	0.299657	0.205972
	371.21	0.491233	0.375286	0.299876	0.205802
	371.41	0.490517	0.375117	0.299679	0.205485
	371.61	0.489923	0.375089	0.299352	0.205567
	371.81	0.489241	0.375104	0.299509	0.205683
	372.01	0.488352	0.374346	0.298722	0.205044
	372.21	0.487409	0.37348	0.298256	0.20469
	372.41	0.487586	0.372944	0.298269	0.204708
	372.61	0.487498	0.372275	0.298261	0.204297
	372.81	0.487333	0.371689	0.298365	0.204225
	373.01	0.487061	0.37106	0.297994	0.204232
	373.21	0.4868	0.370512	0.298672	0.204325
	373.41	0.485905	0.37023	0.298538	0.204123
	373.61	0.485602	0.369598	0.298174	0.203789
	373.81	0.484503	0.368845	0.297696	0.203052
	374.01	0.484413	0.368803	0.297962	0.203101
	374.21	0.484226	0.368939	0.297724	0.203208
	374.41	0.483735	0.368577	0.297897	0.203315
	374.61	0.483741	0.369401	0.298052	0.203721
	374.81	0.483721	0.369633	0.297601	0.203627
	375.01	0.48352	0.369875	0.297851	0.203617
	375.21	0.483452	0.37021	0.297883	0.203889
	375.41	0.482968	0.370213	0.297441	0.203736
	375.61	0.482892	0.369917	0.297133	0.20372
	375.81	0.483061	0.369876	0.297281	0.203388
	376.01	0.483107	0.369712	0.296809	0.202963
	376.21	0.483423	0.369784	0.297219	0.203134
	376.41	0.484424	0.369931	0.29741	0.203208
	376.61	0.484577	0.36962	0.296781	0.203221
	376.81	0.483963	0.369398	0.296196	0.202956
	377.01	0.483798	0.368972	0.29574	0.202793
	377.21	0.483904	0.368936	0.29628	0.20285
	377.41	0.483524	0.368603	0.295802	0.202765
	377.61	0.483989	0.368196	0.295539	0.202739
	377.81	0.483698	0.36829	0.295651	0.202921
	378.01	0.483738	0.368191	0.295559	0.20326
	378.21	0.482809	0.367305	0.295161	0.203081
	378.41	0.482161	0.367025	0.294775	0.2032
	378.61	0.482153	0.367362	0.294843	0.203331
	378.81	0.481862	0.367148	0.294851	0.20332
	379.01	0.481702	0.367133	0.295175	0.203356
	379.21	0.481188	0.366445	0.294496	0.20294
	379.41	0.481294	0.366246	0.294332	0.202422
	379.61	0.481373	0.366018	0.294876	0.20222
	379.81	0.481552	0.36594	0.295073	0.202063
	380.01	0.481512	0.366012	0.294787	0.202089
	380.21	0.481416	0.365951	0.294791	0.202099
	380.41	0.481581	0.365968	0.29443	0.202256
	380.61	0.48129	0.365933	0.294663	0.202497
	380.81	0.480977	0.365908	0.294582	0.202682
	381.01	0.480918	0.365565	0.294758	0.202825
	381.21	0.4807	0.365436	0.294689	0.202622
	381.41	0.480298	0.364873	0.294309	0.20228
	381.61	0.480608	0.364698	0.294269	0.202222
	381.81	0.480019	0.364619	0.294467	0.202105
	382.01	0.479209	0.363856	0.294131	0.201708
	382.21	0.478528	0.363496	0.293478	0.201506
	382.41	0.478518	0.363948	0.293697	0.202178
	382.61	0.478759	0.364138	0.294131	0.202729
	382.81	0.478694	0.364318	0.29453	0.202994
	383.01	0.478447	0.364018	0.294499	0.202585
	383.21	0.47813	0.363661	0.294327	0.202447
	383.41	0.47797	0.363803	0.294539	0.202756
	383.61	0.477654	0.363735	0.29479	0.203106
	383.81	0.47769	0.363485	0.294712	0.203149
	384.01	0.477144	0.363101	0.294084	0.202745
	384.21	0.476378	0.362602	0.293845	0.202501
	384.41	0.476057	0.362293	0.293849	0.202071
	384.61	0.475632	0.362239	0.294057	0.202124
	384.81	0.475453	0.362145	0.293808	0.20209
	385.01	0.474987	0.361527	0.293524	0.201604
	385.21	0.474006	0.360864	0.292539	0.20033
	385.41	0.474142	0.360597	0.29238	0.200225
	385.61	0.474557	0.361241	0.292727	0.200279
	385.81	0.473964	0.361332	0.292374	0.199911
	386.01	0.473776	0.361228	0.291962	0.199855
	386.21	0.474384	0.362085	0.292173	0.200468
	386.41	0.474313	0.362083	0.292481	0.200616
	386.61	0.473982	0.361648	0.291977	0.199982
	386.81	0.474027	0.361658	0.291592	0.199943
	387.01	0.474063	0.361578	0.291594	0.199821
	387.21	0.474096	0.361843	0.291448	0.200141
	387.41	0.47418	0.362427	0.291419	0.200594
	387.61	0.474097	0.362287	0.291561	0.200385
	387.81	0.473931	0.362242	0.291835	0.200017
	388.01	0.473946	0.362014	0.291701	0.199674
	388.21	0.473953	0.362084	0.291968	0.199733
	388.41	0.474239	0.362426	0.29257	0.199408
	388.61	0.47455	0.362537	0.293158	0.200224
	388.81	0.474743	0.362405	0.293849	0.20026
	389.01	0.474549	0.362202	0.293719	0.20034
	389.21	0.474098	0.361851	0.293435	0.200056
	389.41	0.474575	0.361767	0.293436	0.200554
	389.61	0.474339	0.361902	0.293088	0.200694
	389.81	0.47371	0.361119	0.292299	0.200426
	390.01	0.473455	0.360848	0.291965	0.200323
	390.21	0.473268	0.360607	0.292026	0.200416
	390.41	0.472352	0.359278	0.29078	0.19934
	390.61	0.472024	0.358578	0.290189	0.198844
	390.81	0.471851	0.358551	0.289596	0.199078
	391.01	0.471257	0.35796	0.289272	0.198523
	391.21	0.470767	0.357901	0.288522	0.198409
	391.41	0.470923	0.35794	0.28836	0.198207
	391.61	0.470978	0.358121	0.28878	0.198172
	391.81	0.471439	0.35817	0.289453	0.198339
	392.01	0.471642	0.357856	0.289431	0.198025
	392.21	0.471652	0.358067	0.289999	0.198011
	392.41	0.471551	0.358248	0.290786	0.197917
	392.61	0.471807	0.358362	0.29155	0.198069
	392.81	0.471723	0.358325	0.291482	0.197415
	393.01	0.471838	0.358721	0.291421	0.197716
	393.21	0.471653	0.358459	0.291482	0.197182
	393.41	0.471454	0.358622	0.29156	0.197252
	393.61	0.470874	0.358536	0.291264	0.197277
	393.81	0.47051	0.358513	0.291452	0.197232
	394.01	0.470656	0.358587	0.291733	0.197104
	394.21	0.470793	0.358627	0.292233	0.197454
	394.41	0.470524	0.358247	0.291463	0.196896
	394.61	0.469775	0.357524	0.29092	0.196597
	394.81	0.469641	0.357327	0.29013	0.196273
	395.01	0.469297	0.356855	0.289533	0.195884
	395.21	0.4694	0.356793	0.289124	0.196108
	395.41	0.469803	0.356898	0.28886	0.196557
	395.61	0.469692	0.356905	0.289063	0.197046
	395.81	0.469303	0.355744	0.288486	0.196449
	396.01	0.468745	0.355123	0.288176	0.196519
	396.21	0.468651	0.35527	0.288386	0.196887
	396.41	0.468407	0.355224	0.288291	0.196876
	396.61	0.468097	0.355303	0.287952	0.196478
	396.81	0.468045	0.355519	0.287958	0.196445
	397.01	0.468236	0.355776	0.28879	0.197168
	397.21	0.46823	0.355935	0.289692	0.197362
	397.41	0.468118	0.355994	0.289926	0.197977
	397.61	0.467945	0.355787	0.289784	0.198026
	397.81	0.467404	0.355898	0.289912	0.198002
	398.01	0.467295	0.355825	0.290006	0.197778
	398.21	0.466765	0.355361	0.289676	0.197415
	398.41	0.466413	0.355071	0.288982	0.196473
	398.61	0.465743	0.354137	0.28803	0.195841
	398.81	0.4659	0.354017	0.28801	0.195327
	399.01	0.465282	0.353578	0.287576	0.19474
	399.21	0.465743	0.353832	0.287826	0.19541
[truncated: 1,603 more rows]

## Sheet: Fig.6D
Fig. 6D	BLI measurements of the binding of pTau23 (left)/ Tau23 (right) to the SA sensor chip coated with biotinylated Hsp90
Binding affinity of Tau23 with Hsp90							Binding affinity of pTau23 with Hsp90
Time(s)	100 uM	50 uM	25 uM	12.5 uM	6.25 uM		Time(s)	100 uM	50 uM	25 uM	12.5 uM	6.25 uM
0	-0.0015879	-0.00174454	-0.00140828	-0.00077654	-0.0007471		0	-0.00029824	-0.00055487	0.00116421	-6.591e-05	0.00242315
0.2	-0.00177478	-0.00210653	-0.00160781	-0.00151648	-0.0010307		0.2	-0.00191747	-0.00053772	0.00132898	-0.00020538	0.00254094
0.4	-0.00211934	-0.00291049	-0.00287844	-0.00262548	-0.00173352		0.4	-0.0031122	-8.965e-05	0.00151979	3.242e-05	0.00288299
0.6	-0.00203629	-0.00336081	-0.00294321	-0.00337067	-0.00189665		0.6	-0.00463852	-5.396e-05	0.00149164	-0.00026319	0.00280356
0.8	-0.00189025	-0.00387994	-0.00321602	-0.00399749	-0.00240543		0.8	-0.00551954	0.00020232	0.00127243	-0.00048796	0.00278224
1	-0.00183148	-0.00455628	-0.00358897	-0.0048171	-0.00296649		1	-0.00610595	0.0005944	0.00114053	-5.134e-05	0.00266836
1.2	-0.00111587	-0.00454667	-0.00346617	-0.00568607	-0.00329996		1.2	-0.00625706	0.00115809	0.00098189	-0.00013634	0.00230195
1.4	-0.00043736	-0.00490654	-0.00392761	-0.00667776	-0.00393875		1.4	-0.00622485	0.00151809	0.00102341	-0.00040942	0.00187832
1.6	0.00081646	-0.00458784	-0.00358131	-0.00715757	-0.0037655		1.6	-0.00517112	0.00245468	0.00145296	-0.0003852	0.00227841
1.8	0.00213211	-0.00396624	-0.00309807	-0.00754297	-0.00372111		1.8	-0.00306309	0.00383141	0.00227705	-4.203e-05	0.00303523
2	0.00368844	-0.00366195	-0.00274414	-0.00778743	-0.00387749		2	-0.00056479	0.00512751	0.00268282	0.00017492	0.00321636
2.2	0.00504559	-0.00250568	-0.00230898	-0.00768825	-0.00373859		2.2	0.00212547	0.00616448	0.00299924	0.00014978	0.00309927
2.4	0.00666064	-0.0017208	-0.00180626	-0.00738357	-0.00315958		2.4	0.00471452	0.00698122	0.00330375	7.949e-05	0.00247522
2.6	0.00839178	-0.00125385	-0.00105001	-0.00714696	-0.00296196		2.6	0.00778782	0.0080528	0.0040927	0.00026564	0.00245778
2.8	0.00983496	-9.007e-05	-0.00017421	-0.00726906	-0.00233601		2.8	0.00998756	0.00926394	0.00485326	0.00018968	0.00249435
3	0.0108298	0.00059844	0.00044536	-0.00725498	-0.00238053		3	0.0119186	0.0102817	0.00565231	0.00044015	0.00246712
3.2	0.0127427	0.00109291	0.00081666	-0.0067676	-0.0021075		3.2	0.0138407	0.0112994	0.00662921	0.00040241	0.00190533
3.4	0.0130578	0.00157411	0.00094834	-0.00721251	-0.00230838		3.4	0.0155867	0.0127465	0.00794666	0.00083313	0.00202871
3.6	0.0142931	0.00293348	0.00127177	-0.00712943	-0.0018644		3.6	0.0174052	0.0137016	0.00890411	0.00084047	0.00178007
3.8	0.0147453	0.00453938	0.00157157	-0.00631375	-0.0015853		3.8	0.0193707	0.0152302	0.00941384	0.0004955	0.00126449
4	0.0155621	0.00543574	0.00169166	-0.00570052	-0.00162117		4	0.0216666	0.0165828	0.0101364	0.00097972	0.00185553
4.2	0.0163888	0.00602174	0.00159847	-0.00567427	-0.00176054		4.2	0.0235843	0.0180265	0.0108064	0.00137216	0.00206888
4.4	0.0169092	0.00615995	0.00090859	-0.00604048	-0.00239722		4.4	0.0254289	0.0195274	0.011038	0.00208299	0.00256413
4.6	0.0172258	0.00594779	0.00147946	-0.00606385	-0.00301502		4.6	0.0264447	0.0203502	0.0109876	0.00178045	0.00227071
4.8	0.0178046	0.00620416	0.00146743	-0.00568103	-0.00388768		4.8	0.0280506	0.0214857	0.0110758	0.00217765	0.00225221
5	0.0184681	0.0064148	0.00166478	-0.00572734	-0.00410651		5	0.0291221	0.0227151	0.0111302	0.00299951	0.00226866
5.2	0.0193984	0.00697614	0.0021811	-0.0054851	-0.00420708		5.2	0.030408	0.0237392	0.011375	0.00300158	0.00216465
5.4	0.0203938	0.00713163	0.00214079	-0.00538172	-0.00424397		5.4	0.032104	0.0248362	0.0118757	0.00326538	0.00239367
5.6	0.0214258	0.007989	0.00313914	-0.00492112	-0.00395793		5.6	0.0334902	0.0255118	0.0120228	0.0035963	0.00245974
5.8	0.022658	0.00859936	0.00339006	-0.00485873	-0.00431805		5.8	0.0349825	0.0263261	0.0123915	0.00411562	0.0028912
6	0.0233742	0.00867714	0.0032327	-0.00504418	-0.00476083		6	0.0359509	0.0265914	0.0119402	0.00380769	0.00218344
6.2	0.0246564	0.00974671	0.00397139	-0.00452032	-0.00448481		6.2	0.0366103	0.0266256	0.012201	0.00353765	0.00156916
6.4	0.0259618	0.0100868	0.00434958	-0.00453886	-0.00459436		6.4	0.0381906	0.0272511	0.0128682	0.00383349	0.00181462
6.6	0.0269703	0.0104397	0.00492889	-0.00419563	-0.00445891		6.6	0.0394854	0.0280251	0.0135091	0.00410423	0.00198991
6.8	0.0276245	0.0107457	0.00481202	-0.00432065	-0.00440129		6.8	0.0401322	0.0289247	0.0140567	0.00432491	0.00209209
7	0.0283156	0.0110565	0.00505371	-0.00413732	-0.00441132		7	0.041567	0.0295412	0.0148965	0.00470134	0.00196386
7.2	0.0290916	0.0117871	0.00518936	-0.0038336	-0.00411813		7.2	0.0428593	0.0300103	0.0153836	0.00468378	0.00200084
7.4	0.0291525	0.012084	0.00493011	-0.00411504	-0.00398698		7.4	0.044207	0.0305382	0.0159986	0.00501095	0.00216099
7.6	0.0299918	0.0131774	0.00497733	-0.00340546	-0.00353331		7.6	0.0456955	0.0309827	0.0163401	0.00533579	0.00225637
7.8	0.0305324	0.0138661	0.00513399	-0.00309073	-0.00359337		7.8	0.0470219	0.031401	0.0165766	0.005565	0.00218332
8	0.0315042	0.0141906	0.00535417	-0.00318398	-0.00382063		8	0.0490085	0.0328611	0.0175557	0.00686754	0.00306483
8.2	0.0319007	0.014353	0.00516129	-0.00394766	-0.00396075		8.2	0.0505062	0.0338941	0.0181444	0.00747852	0.00326008
8.4	0.0321247	0.0145307	0.00498102	-0.00463844	-0.00462146		8.4	0.0521885	0.0352268	0.0189764	0.0082545	0.00415384
8.6	0.0322432	0.0144486	0.00499032	-0.00502147	-0.00485971		8.6	0.0527777	0.0360756	0.019363	0.00783259	0.00416246
8.8	0.0332776	0.0153167	0.00590757	-0.00483879	-0.0042586		8.8	0.0542065	0.0369815	0.019894	0.00841005	0.00429842
9	0.0341844	0.0160383	0.0066265	-0.00497027	-0.00351995		9	0.0557665	0.0384414	0.0207848	0.00937396	0.00494947
9.2	0.0347948	0.0169668	0.00695742	-0.00502065	-0.00339514		9.2	0.0570267	0.039487	0.0216446	0.00989584	0.00497357
9.4	0.0358417	0.0181659	0.00778028	-0.00500411	-0.0031294		9.4	0.0576107	0.0402775	0.0215705	0.00974733	0.00453866
9.6	0.0364612	0.0190575	0.00847184	-0.0047773	-0.00328413		9.6	0.0579468	0.0408437	0.0217308	0.00988939	0.00440717
9.8	0.0380775	0.0195812	0.00875435	-0.0045607	-0.00337663		9.8	0.059475	0.0420367	0.0222737	0.0100441	0.00513311
10	0.0391976	0.0201289	0.00956204	-0.00379825	-0.00312004		10	0.060412	0.043003	0.0225777	0.00999038	0.00509117
10.2	0.0408903	0.0208774	0.0103443	-0.0029664	-0.00283552		10.2	0.0608134	0.0432987	0.0231442	0.0100752	0.00504643
10.4	0.0418784	0.0214124	0.0110362	-0.00232087	-0.00282128		10.4	0.061854	0.0440617	0.0234542	0.0102782	0.00554357
10.6	0.0424688	0.0213645	0.0113125	-0.0018091	-0.00260859		10.6	0.0620919	0.0443996	0.0239107	0.0099414	0.00511658
10.8	0.0427867	0.0217551	0.0110543	-0.00144371	-0.00277813		10.8	0.0622492	0.0450272	0.0241102	0.00993011	0.00483888
11	0.0430145	0.0218688	0.0111298	-0.00103058	-0.00267913		11	0.06254	0.045606	0.0242461	0.00983473	0.00448282
11.2	0.043582	0.0218863	0.0108122	-0.00084667	-0.00292476		11.2	0.0634769	0.0459211	0.0243122	0.00933075	0.00460864
11.4	0.0445361	0.0222566	0.0108585	-0.00011533	-0.00267865		11.4	0.0642994	0.0463701	0.0241315	0.00901136	0.00429772
11.6	0.0447462	0.0227017	0.0107198	0.0003874	-0.00275665		11.6	0.0650312	0.0464373	0.0241349	0.00925537	0.00425378
11.8	0.0451203	0.0232286	0.0107957	0.00093772	-0.00273255		11.8	0.0653941	0.0464511	0.0237882	0.00864292	0.00346153
12	0.0451302	0.0233311	0.0106619	0.00084803	-0.0028953		12	0.0665367	0.0476345	0.0244555	0.00933439	0.00354821
12.2	0.0454478	0.0232376	0.00993578	0.00032835	-0.00304122		12.2	0.0676733	0.0484161	0.0251911	0.00920402	0.00361173
12.4	0.0458975	0.0238653	0.00995107	0.00012698	-0.00315593		12.4	0.068789	0.0493439	0.0258026	0.00922625	0.0038009
12.6	0.0455683	0.0233592	0.00974812	-0.0010338	-0.00368092		12.6	0.0695186	0.0493616	0.0258654	0.0087457	0.00331758
12.8	0.0461033	0.024077	0.0104052	-0.00130097	-0.00338592		12.8	0.0710091	0.0500548	0.0267069	0.00943574	0.00350393
13	0.0463872	0.0251246	0.0107418	-0.0017871	-0.0036113		13	0.0717949	0.0508365	0.0271481	0.00993734	0.00376456
13.2	0.0468362	0.0259764	0.0111193	-0.00204759	-0.00409652		13.2	0.0723774	0.0512588	0.027001	0.010047	0.00393266
13.4	0.0475343	0.0267665	0.0119298	-0.00250537	-0.00417995		13.4	0.0722915	0.051562	0.0264739	0.00977431	0.00355338
13.6	0.0484668	0.0269937	0.012196	-0.00285593	-0.00451189		13.6	0.0738782	0.0527265	0.0269405	0.0107502	0.0044285
13.8	0.0490586	0.0269547	0.0124396	-0.00325444	-0.00483507		13.8	0.0751131	0.0536889	0.0272375	0.0111732	0.00483003
14	0.049478	0.0273575	0.0129581	-0.00342618	-0.00461192		14	0.075275	0.0539518	0.0274709	0.0116782	0.00502163
14.2	0.0494668	0.0274981	0.0132472	-0.00400554	-0.00464498		14.2	0.0755614	0.0542068	0.0280063	0.0120869	0.00553695
14.4	0.0497965	0.0277446	0.0138064	-0.00387352	-0.00468046		14.4	0.0759627	0.05458	0.0287842	0.0125092	0.0063724
14.6	0.0497295	0.0277573	0.0140129	-0.00383918	-0.00445487		14.6	0.0764608	0.0548134	0.0295177	0.0128051	0.00674028
14.8	0.0491736	0.0275715	0.0137365	-0.00412045	-0.00481337		14.8	0.0768016	0.0555792	0.0293545	0.0128359	0.00705621
15	0.0493489	0.0271954	0.0136831	-0.00416647	-0.00500463		15	0.0776341	0.0563218	0.0300084	0.0130741	0.00760136
15.2	0.050185	0.0276275	0.0140313	-0.00400093	-0.00486904		15.2	0.0785694	0.0569704	0.0305279	0.0130656	0.00815664
15.4	0.0509085	0.028322	0.0141247	-0.00328057	-0.00408057		15.4	0.0795487	0.0575877	0.0308295	0.0140115	0.00843163
15.6	0.050928	0.0282366	0.0142883	-0.00312259	-0.00395275		15.6	0.080205	0.0581431	0.0315887	0.014722	0.0084379
15.8	0.0513393	0.0281736	0.0143738	-0.00287695	-0.00365358		15.8	0.0808439	0.0588417	0.0319812	0.0147126	0.00811524
16	0.0521756	0.0281909	0.0148783	-0.00248666	-0.00300659		16	0.0819004	0.0601095	0.0331876	0.0156151	0.00847764
16.2	0.0527582	0.0284549	0.0148917	-0.00241141	-0.00297422		16.2	0.0826426	0.0610623	0.0341628	0.0159361	0.00844055
16.4	0.052902	0.0290393	0.0150895	-0.00257909	-0.00281799		16.4	0.0835427	0.0617552	0.0347237	0.0161402	0.00855975
16.6	0.0531171	0.0291338	0.0150555	-0.00286395	-0.00298789		16.6	0.0840075	0.0622372	0.0350865	0.0159438	0.00853414
16.8	0.0536775	0.0298909	0.0154589	-0.00266737	-0.00275501		16.8	0.0842454	0.0629433	0.0354726	0.0158762	0.00827873
17	0.0544307	0.0306274	0.0156806	-0.00253917	-0.00307181		17	0.0841938	0.0625509	0.0347073	0.0153112	0.00744618
17.2	0.0554229	0.0316035	0.0159078	-0.00204997	-0.00291529		17.2	0.0845727	0.0628088	0.0345109	0.0151564	0.00722154
17.4	0.0561991	0.0325391	0.0160763	-0.00194171	-0.00279187		17.4	0.0848003	0.0636729	0.0345926	0.0154156	0.00704379
17.6	0.0569368	0.0330387	0.0165081	-0.00110253	-0.00249989		17.6	0.0862895	0.0646272	0.0349142	0.0162679	0.00777968
17.8	0.0566089	0.0334906	0.0165279	-0.00097944	-0.00237476		17.8	0.0865	0.0646004	0.0351813	0.0162056	0.00761572
18	0.0576613	0.03468	0.0171437	-0.00030881	-0.00115966		18	0.0870926	0.0646389	0.0353033	0.0168054	0.0081446
18.2	0.057905	0.0352208	0.0171178	9.554e-05	-0.00102707		18.2	0.0878286	0.0649206	0.0361389	0.0171985	0.00882866
18.4	0.0585842	0.036451	0.017467	0.00100276	-0.00069039		18.4	0.0885802	0.0649853	0.0362446	0.0173079	0.00935784
18.6	0.0584492	0.0370002	0.0178469	0.00105193	-0.00045927		18.6	0.0893366	0.0652384	0.0360646	0.017267	0.00932822
18.8	0.0584754	0.0365864	0.0174625	0.00080947	-0.00109599		18.8	0.0891488	0.0655187	0.0360868	0.01687	0.00949799
19	0.0595144	0.0369542	0.0177802	0.0010279	-0.00071407		19	0.0896293	0.0661684	0.0366457	0.0173502	0.00987803
19.2	0.0605235	0.037124	0.0184604	0.00137397	-0.0003977		19.2	0.0898942	0.0667689	0.0366156	0.0175814	0.00970162
19.4	0.0614507	0.0377565	0.0187374	0.00133185	-0.00028382		19.4	0.0901139	0.0669429	0.0365804	0.0180145	0.00960232
19.6	0.0616815	0.0376091	0.0194117	0.0015725	-0.00022114		19.6	0.0901929	0.0679438	0.0369113	0.0179653	0.00940161
19.8	0.0621931	0.0375202	0.0196546	0.00129203	-0.000266		19.8	0.0904143	0.0681229	0.0365808	0.017996	0.00914071
20	0.0629123	0.037727	0.0199776	0.0019525	-6.759e-05		20	0.0908447	0.0682825	0.0367282	0.0179903	0.00914706
20.2	0.0625628	0.0373692	0.0197102	0.00124333	-0.00063893		20.2	0.0909406	0.0685847	0.0370379	0.0179356	0.00899251
20.4	0.0624688	0.0371363	0.0194419	0.00047055	-0.00076753		20.4	0.0912509	0.0692261	0.0370472	0.0177566	0.0090794
20.6	0.062441	0.0367418	0.0193584	-9.742e-05	-0.00139144		20.6	0.0910974	0.0689226	0.0369739	0.0169799	0.00853154
20.8	0.0626106	0.0367621	0.0191533	-0.00034921	-0.00187225		20.8	0.0914714	0.0688937	0.0369401	0.0167414	0.00809428
21	0.0638613	0.0373826	0.0196362	0.00040511	-0.0016416		21	0.0925494	0.0690324	0.037088	0.0171031	0.00845336
21.2	0.064232	0.0376509	0.0197314	0.00051997	-0.00183272		21.2	0.0932935	0.0698303	0.0375679	0.0175692	0.00891424
21.4	0.0647195	0.0381855	0.0199574	0.0007368	-0.0021124		21.4	0.094012	0.0703862	0.0381746	0.01805	0.00962163
21.6	0.0651488	0.0386318	0.0201333	0.00092498	-0.0019638		21.6	0.09501	0.0707279	0.038629	0.0182296	0.0100175
21.8	0.0652349	0.0391374	0.0197336	0.00081441	-0.00208247		21.8	0.0954953	0.0709405	0.0396258	0.0184005	0.0104415
22	0.0661808	0.0399728	0.0201121	0.00116983	-0.00166557		22	0.0964616	0.0714604	0.039952	0.018857	0.0111225
22.2	0.066237	0.0400866	0.0197226	0.00151251	-0.00215078		22.2	0.0968655	0.0719482	0.0402684	0.0191305	0.0113899
22.4	0.0662674	0.0405384	0.0199204	0.00190107	-0.00210931		22.4	0.0971385	0.0721903	0.0400448	0.0190104	0.0114551
22.6	0.0662185	0.0402799	0.0199798	0.00177401	-0.00198673		22.6	0.0971429	0.0727115	0.0406738	0.0189544	0.0112482
22.8	0.0670824	0.0400113	0.0202416	0.0023905	-0.00247466		22.8	0.0967753	0.0732428	0.0411253	0.018883	0.0112171
23	0.0680841	0.0405756	0.0207301	0.00325493	-0.00195264		23	0.0972176	0.0740346	0.0412336	0.0191854	0.0109743
23.2	0.0691273	0.041026	0.0211752	0.00394378	-0.00177808		23.2	0.0974852	0.0745326	0.0410956	0.019272	0.0105758
23.4	0.0691432	0.0415689	0.0211971	0.00373984	-0.00183273		23.4	0.0972866	0.0747298	0.0408076	0.0187902	0.0103679
23.6	0.0694343	0.0417488	0.0211371	0.00413032	-0.00147532		23.6	0.0988563	0.0757711	0.0413913	0.0192943	0.01061
23.8	0.0700482	0.042247	0.0210898	0.00401064	-0.00120132		23.8	0.0997942	0.0759116	0.0410261	0.0196616	0.0104445
24	0.0704123	0.0429777	0.0211615	0.00451827	-0.00075081		24	0.100325	0.0760666	0.040975	0.019734	0.0103414
24.2	0.0698959	0.0424961	0.0208388	0.00380371	-0.00119141		24.2	0.100763	0.0766375	0.0413052	0.0198578	0.0099111
24.4	0.069963	0.0428746	0.0208075	0.00366749	-0.00117053		24.4	0.101635	0.077092	0.0414775	0.0201934	0.00957047
24.6	0.070384	0.043862	0.0218169	0.00391389	-0.00078575		24.6	0.102051	0.0769821	0.0422266	0.0204516	0.00971068
24.8	0.0711056	0.0443205	0.0217432	0.00422241	-0.00055686		24.8	0.102714	0.0772226	0.0424527	0.0209793	0.00988309
25	0.0717595	0.0447065	0.0221671	0.00446405	-0.00030864		25	0.103461	0.0772843	0.0431515	0.0213797	0.010035
25.2	0.0711868	0.0449817	0.021916	0.00374274	-0.00101146		25.2	0.103414	0.0769811	0.0435497	0.0211618	0.00985936
25.4	0.0713514	0.0454018	0.0220744	0.00398173	-0.00100256		25.4	0.103928	0.0769766	0.0437865	0.0212581	0.0101443
25.6	0.0715081	0.0454825	0.0218792	0.00372002	-0.00110736		25.6	0.104341	0.0774124	0.0439394	0.0211092	0.0103259
25.8	0.0718049	0.0457295	0.022218	0.00392104	-0.00110868		25.8	0.104345	0.0776268	0.04395	0.0211829	0.0107848
26	0.0719058	0.0455707	0.0225091	0.00371953	-0.00136843		26	0.104468	0.077804	0.0434307	0.0213452	0.0107105
26.2	0.0720872	0.0452208	0.0224091	0.00339993	-0.00156707		26.2	0.104387	0.0776828	0.0432794	0.0212143	0.0105754
26.4	0.0725276	0.045166	0.0230412	0.00354016	-0.00108807		26.4	0.104616	0.0779404	0.0434561	0.0209537	0.0104927
26.6	0.0733437	0.045581	0.0237164	0.00368846	-0.00073053		26.6	0.104798	0.0783885	0.0438854	0.0209122	0.0105824
26.8	0.0739088	0.0456283	0.0241188	0.00415097	-0.00103877		26.8	0.104595	0.0786384	0.0437754	0.0208513	0.0105373
27	0.0746273	0.0461604	0.02454	0.00464207	-0.00022236		27	0.104806	0.0789772	0.0437402	0.0208053	0.0106958
27.2	0.0748749	0.0464432	0.0249291	0.00433945	-0.00024266		27.2	0.105289	0.0797332	0.0442411	0.0207422	0.0113035
27.4	0.0744815	0.0464685	0.0250478	0.00381884	-0.00022634		27.4	0.105874	0.0803236	0.0446238	0.0206698	0.0117504
27.6	0.0752308	0.0471775	0.0254673	0.00461585	0.00028772		27.6	0.106864	0.0809681	0.0450683	0.0211371	0.0120302
27.8	0.0757722	0.0481384	0.025987	0.00523984	0.00077923		27.8	0.10729	0.0816938	0.0447273	0.0216005	0.0120084
28	0.0753502	0.0482551	0.0258651	0.00533221	0.00041399		28	0.10711	0.0821005	0.045241	0.0215772	0.0119402
28.2	0.0748058	0.0478589	0.0258644	0.00525296	-0.0001786		28.2	0.107131	0.0823666	0.0456008	0.0216321	0.0114831
28.4	0.0750179	0.0484641	0.0261187	0.00586295	-3.498e-05		28.4	0.107373	0.0829844	0.0460931	0.0219188	0.0117272
28.6	0.0752329	0.049071	0.0266419	0.00645089	0.0003444		28.6	0.107199	0.0832258	0.0467476	0.0221121	0.0120849
28.8	0.0753757	0.0491353	0.0261166	0.00665301	0.00041365		28.8	0.10765	0.0834519	0.0466736	0.0217588	0.0121948
29	0.0754188	0.0497167	0.0264489	0.0068805	0.00058414		29	0.108292	0.0835093	0.0468315	0.0214172	0.0118183
29.2	0.0751776	0.0498331	0.0267112	0.00681637	0.00044983		29.2	0.108653	0.0836971	0.0467978	0.021343	0.0117018
29.4	0.075744	0.0497683	0.0264853	0.00713562	0.00040567		29.4	0.109035	0.0839637	0.0465962	0.0218608	0.0116601
29.6	0.0764428	0.0500309	0.0266102	0.00685721	8.75e-05		29.6	0.109322	0.0843277	0.046525	0.0219027	0.011489
29.8	0.077241	0.0503663	0.0269187	0.00681629	-6.357e-05		29.8	0.110185	0.0850565	0.0466724	0.0223066	0.0117826
30	0.077703	0.0503998	0.0271259	0.00661817	-0.00020818		30	0.110684	0.0853478	0.047115	0.0225718	0.011741
30.2	0.0787835	0.0509692	0.0274531	0.00639132	0.000269		30.2	0.110983	0.0854221	0.0470785	0.0225427	0.0119644
30.4	0.0798639	0.0515453	0.028126	0.00665483	0.00048932		30.4	0.111472	0.0861216	0.0476634	0.0230936	0.0122833
30.6	0.0801767	0.0520621	0.0279174	0.00685411	0.00042611		30.6	0.111915	0.0861569	0.047917	0.0233398	0.0124758
30.8	0.0804085	0.052266	0.0280361	0.00672676	0.00033918		30.8	0.112624	0.086773	0.0487335	0.024037	0.0128792
31	0.0808855	0.0524995	0.0283924	0.00697	0.00034281		31	0.113351	0.0873208	0.0493236	0.0244383	0.0137833
31.2	0.0810809	0.0529271	0.0290323	0.00702216	0.00034388		31.2	0.114565	0.0885149	0.0502111	0.0252015	0.0145245
31.4	0.0811831	0.0528646	0.0289193	0.00717758	0.00035443		31.4	0.11472	0.0884281	0.0500566	0.0252786	0.0144604
31.6	0.0817733	0.0533533	0.0290041	0.00747694	0.00043007		31.6	0.11472	0.0881947	0.0501644	0.0254751	0.0142853
31.8	0.0820758	0.0534954	0.0291844	0.00711467	0.00035286		31.8	0.115307	0.0885337	0.0505458	0.0258559	0.0146357
32	0.0815925	0.0530383	0.0290283	0.00696297	-0.00024608		32	0.115498	0.0888572	0.0511048	0.0260877	0.0151191
32.2	0.0817944	0.0529329	0.0289246	0.00713163	-0.00065735		32.2	0.115307	0.0886431	0.0504107	0.0258717	0.0148845
32.4	0.0815219	0.0526741	0.0286799	0.00716199	-0.00099741		32.4	0.115664	0.0892488	0.0509074	0.0256455	0.0153072
32.6	0.0814562	0.052771	0.0287752	0.0072529	-0.00096259		32.6	0.116357	0.0893244	0.0508592	0.0255537	0.0155079
32.8	0.0814073	0.0528865	0.0288781	0.00686635	-0.00090188		32.8	0.116962	0.0894881	0.0509167	0.0254387	0.0153087
33	0.0817112	0.053037	0.0293124	0.00677676	-0.00082981		33	0.11726	0.0894185	0.0507692	0.0250312	0.0149477
33.2	0.0820071	0.0533948	0.0294281	0.00675693	-0.00065166		33.2	0.117529	0.0897322	0.0508302	0.0249703	0.0149975
33.4	0.0825446	0.053519	0.0292924	0.00640089	-0.00060776		33.4	0.117092	0.0897799	0.0508258	0.0250332	0.0145998
33.6	0.0826992	0.0537312	0.0295216	0.0059337	-0.00057158		33.6	0.116827	0.090215	0.0510239	0.0245089	0.014746
33.8	0.0828641	0.054094	0.0294591	0.0060285	-0.00055674		33.8	0.117019	0.090652	0.0517313	0.0245367	0.015223
34	0.0830775	0.0545094	0.0299666	0.00615533	-0.00033075		34	0.11639	0.0901571	0.0516351	0.0242436	0.0150229
34.2	0.0841427	0.0557242	0.0303871	0.00657635	0.00021859		34.2	0.116171	0.0900632	0.051272	0.0242631	0.0146952
34.4	0.0845315	0.056531	0.0303541	0.00704432	0.00035289		34.4	0.116814	0.0900752	0.052189	0.0244361	0.0149613
34.6	0.0846951	0.0567846	0.0299399	0.00738698	0.001049		34.6	0.117621	0.0907117	0.0523954	0.0248948	0.0156697
34.8	0.0845026	0.0567721	0.0299804	0.00730723	0.00089298		34.8	0.117962	0.0912116	0.0529531	0.0252446	0.0160727
35	0.0843499	0.0567158	0.0302843	0.00785182	0.00114918		35	0.118167	0.0914147	0.0524294	0.0251472	0.0160492
35.2	0.0848602	0.0569053	0.0304566	0.00793961	0.00148313		35.2	0.118483	0.0922584	0.0525291	0.025882	0.0160876
35.4	0.0852978	0.0567641	0.0304501	0.00828906	0.00163966		35.4	0.118427	0.0922664	0.0524995	0.025581	0.0159342
35.6	0.0860314	0.0571157	0.0309459	0.00817321	0.0016883		35.6	0.118767	0.0923671	0.0527869	0.0258361	0.0159393
35.8	0.0865126	0.0570274	0.0311942	0.00844946	0.00175635		35.8	0.11924	0.0928184	0.0529801	0.0265463	0.0162498
36	0.0860966	0.0566942	0.030841	0.00856683	0.00177938		36	0.119599	0.0929453	0.0531864	0.0267957	0.0165584
36.2	0.0866159	0.0566623	0.0309363	0.00873509	0.0020692		36.2	0.119865	0.0933192	0.0530227	0.0270922	0.0164538
36.4	0.0863853	0.05638	0.0306077	0.00831321	0.00131708		36.4	0.120202	0.0936305	0.0533941	0.0274796	0.0165942
36.6	0.086821	0.0566135	0.0308666	0.00842279	0.00110825		36.6	0.12042	0.0938244	0.0534711	0.0277163	0.0167023
36.8	0.086855	0.0567334	0.0309482	0.00879353	0.0013855		36.8	0.120184	0.0936285	0.0535362	0.0276201	0.0160329
37	0.0877915	0.0571091	0.031629	0.00956038	0.00188582		37	0.12018	0.09401	0.0536094	0.0276603	0.0161889
37.2	0.0879042	0.0573149	0.0318486	0.0098682	0.00224757		37.2	0.120011	0.0942765	0.0538243	0.027422	0.0159973
37.4	0.0879148	0.0573138	0.0321628	0.00953912	0.00202275		37.4	0.119242	0.0946054	0.0545303	0.0274321	0.0157981
37.6	0.0886289	0.0574622	0.0325646	0.00970555	0.00180518		37.6	0.119146	0.0947464	0.0549612	0.0275893	0.0158608
37.8	0.089231	0.0579239	0.0330398	0.00997669	0.00178633		37.8	0.119971	0.0946536	0.055413	0.0281641	0.0159541
38	0.0898172	0.0585096	0.033644	0.00979929	0.00179852		38	0.120267	0.0946817	0.0551661	0.0284055	0.0159285
38.2	0.0907661	0.0593791	0.0337109	0.0100824	0.0022074		38.2	0.121425	0.0956878	0.0557085	0.0292895	0.0163647
38.4	0.0907956	0.0588646	0.032813	0.0095532	0.00153638		38.4	0.12226	0.0963452	0.0563372	0.0301001	0.0171294
38.6	0.0907623	0.0584924	0.0326364	0.00927748	0.00140501		38.6	0.122352	0.0962718	0.0559043	0.0300842	0.0170217
38.8	0.0902055	0.0586832	0.0329652	0.0094335	0.00121171		38.8	0.122336	0.0964005	0.0561805	0.0298166	0.0168604
39	0.0906151	0.0587833	0.0333754	0.00942028	0.00129676		39	0.123039	0.096697	0.0561676	0.030121	0.0167545
39.2	0.0917569	0.0594843	0.0342103	0.00974465	0.00165621		39.2	0.123389	0.0973426	0.0565824	0.0301518	0.0171099
39.4	0.092134	0.0595743	0.0343318	0.00980317	0.00167656		39.4	0.124118	0.0975194	0.0568722	0.0297547	0.0172892
39.6	0.0924281	0.0600617	0.0344397	0.00963222	0.00160065		39.6	0.124617	0.0974792	0.0569941	0.0300415	0.0176142
39.8	0.0925391	0.0599251	0.0339902	0.00951176	0.00161666		39.8	0.125295	0.0979012	0.0568847	0.0303614	0.0179483
40	0.0922799	0.0601815	0.0337791	0.00916312	0.00182968		40	0.12587	0.0976555	0.0569021	0.0302386	0.018353
40.2	0.0930705	0.0605672	0.034231	0.00971979	0.0017607		40.2	0.126507	0.0981864	0.0572376	0.030539	0.0188274
40.4	0.0927547	0.0608329	0.0338926	0.00973964	0.00142207		40.4	0.126209	0.0978932	0.0568204	0.0301232	0.0186641
40.6	0.0929092	0.0609968	0.0339378	0.00992773	0.00131034		40.6	0.126401	0.0977752	0.0568052	0.0296794	0.0187398
40.8	0.0928946	0.0608741	0.0336478	0.0102616	0.00157765		40.8	0.126612	0.0976186	0.0569782	0.0295413	0.0188012
41	0.0939343	0.0617468	0.0345041	0.0108733	0.00221365		41	0.126809	0.0979947	0.0573053	0.0291363	0.0192267
41.2	0.0937594	0.0620511	0.0344686	0.0107538	0.0022301		41.2	0.126782	0.0979385	0.0572587	0.0285372	0.0190891
41.4	0.0943856	0.0624534	0.0349563	0.0106417	0.00205237		41.4	0.127017	0.0984253	0.0574207	0.0291618	0.0190689
41.6	0.0949826	0.0624772	0.0352424	0.0106694	0.00245445		41.6	0.127957	0.0991588	0.0574665	0.0296701	0.0190602
41.8	0.0947524	0.0629685	0.0355299	0.0105878	0.00294658		41.8	0.129348	0.100249	0.058014	0.030741	0.0197826
42	0.0954274	0.0633348	0.0356938	0.0109747	0.00341208		42	0.129681	0.100888	0.0583959	0.0315394	0.0200653
42.2	0.0957163	0.063227	0.0353422	0.0114313	0.00370803		42.2	0.130033	0.101827	0.0588817	0.0321023	0.0201348
42.4	0.095653	0.0632201	0.0352754	0.0116834	0.00346114		42.4	0.129725	0.101499	0.0593451	0.0318908	0.0199732
42.6	0.0949523	0.0635487	0.035633	0.0121889	0.00392723		42.6	0.12973	0.101492	0.0598403	0.0317678	0.0200547
42.8	0.0946474	0.0639627	0.0360215	0.0122532	0.00375869		42.8	0.130183	0.10228	0.06039	0.0321553	0.0204463
43	0.0947665	0.0637675	0.0363965	0.01243	0.00359726		43	0.130717	0.102763	0.06071	0.0324573	0.0204244
43.2	0.0952886	0.0641046	0.0370459	0.0130787	0.00372466		43.2	0.130819	0.10339	0.0606686	0.0321835	0.0204453
43.4	0.0953144	0.0637897	0.0373187	0.0135092	0.00377329		43.4	0.131622	0.103785	0.0609421	0.0324209	0.0208749
43.6	0.0951688	0.0640904	0.0376836	0.0138598	0.00341822		43.6	0.131685	0.103795	0.0612306	0.0329475	0.0211518
43.8	0.0950643	0.0636731	0.0378907	0.0136627	0.00284281		43.8	0.131984	0.104226	0.0612188	0.0327463	0.0209967
44	0.095289	0.0643122	0.0384656	0.0137943	0.00306483		44	0.132325	0.104412	0.0616921	0.0328863	0.0212293
44.2	0.0955258	0.0642609	0.0384902	0.0137568	0.00239604		44.2	0.13295	0.105232	0.0624905	0.0327356	0.0216043
44.4	0.0957418	0.0647714	0.0383119	0.0135242	0.00234573		44.4	0.132133	0.105095	0.0617759	0.032322	0.0211329
44.6	0.0961986	0.0644198	0.037863	0.0124713	0.0016278		44.6	0.132104	0.104814	0.061591	0.0318891	0.0206663
44.8	0.0963019	0.0648652	0.0382141	0.0124902	0.00204343		44.8	0.131482	0.104452	0.0612921	0.0316193	0.0200352
45	0.0969606	0.0658638	0.0388878	0.0129222	0.00245251		45	0.131583	0.104064	0.0604234	0.0314489	0.0194683
45.2	0.0971941	0.0658883	0.0385277	0.0124516	0.00258396		45.2	0.131587	0.104196	0.0597737	0.0318379	0.0192827
45.4	0.0977688	0.0663349	0.0389488	0.0126129	0.00278236		45.4	0.132154	0.104667	0.0596577	0.0324435	0.0193198
45.6	0.0978838	0.0667218	0.0391176	0.0127748	0.00334326		45.6	0.132765	0.104965	0.0599567	0.0329503	0.0195482
45.8	0.0982421	0.0671438	0.0389805	0.013083	0.00375067		45.8	0.133265	0.105323	0.0603651	0.0335652	0.0200624
46	0.0987112	0.0675522	0.0391233	0.0132963	0.00388257		46	0.133614	0.105357	0.0606239	0.0339196	0.0202279
46.2	0.0984921	0.0675645	0.0388331	0.0129227	0.00367505		46.2	0.133844	0.105452	0.0607785	0.0337022	0.0205301
46.4	0.0983332	0.0683307	0.0389228	0.0127819	0.00379766		46.4	0.134406	0.105427	0.0614099	0.0340364	0.0209828
46.6	0.0982247	0.0681112	0.0389246	0.0129147	0.00384111		46.6	0.134974	0.106001	0.0618172	0.0350686	0.0215803
46.8	0.0985258	0.0681157	0.0393426	0.0128669	0.00381289		46.8	0.135319	0.106008	0.0614732	0.0351426	0.0218138
47	0.0989358	0.0678879	0.039706	0.013159	0.00414598		47	0.135086	0.106165	0.0615947	0.0351215	0.021708
47.2	0.0995402	0.0679218	0.0398842	0.0133298	0.00447702		47.2	0.135431	0.106454	0.061417	0.0354908	0.0218855
47.4	0.0997977	0.0679706	0.0406451	0.0134302	0.00471672		47.4	0.136236	0.106707	0.0617581	0.035841	0.0227083
47.6	0.099955	0.0681003	0.0407469	0.0130081	0.00423221		47.6	0.136082	0.1069	0.0624964	0.0358956	0.0229901
47.8	0.100136	0.0682363	0.0410487	0.0124	0.00414603		47.8	0.136375	0.107317	0.0630979	0.0353244	0.0230461
48	0.100462	0.0684219	0.0411957	0.0120817	0.0041182		48	0.13608	0.10744	0.0632078	0.0349714	0.0227762
48.2	0.100826	0.0687955	0.0413272	0.011692	0.00389377		48.2	0.13586	0.107309	0.0633563	0.0347318	0.0227169
48.4	0.101338	0.06848	0.0413287	0.0114454	0.00402394		48.4	0.135035	0.106948	0.0623921	0.0341121	0.021462
48.6	0.101305	0.0682755	0.0412969	0.0111859	0.00385428		48.6	0.135319	0.10699	0.0622436	0.0342749	0.0207325
48.8	0.101639	0.0688186	0.0415864	0.0117917	0.00450896		48.8	0.135161	0.107084	0.0616585	0.0345857	0.0206269
49	0.101876	0.069229	0.0415563	0.0120594	0.00469577		49	0.135365	0.107322	0.0614552	0.034696	0.0207319
49.2	0.102556	0.0698933	0.0417242	0.0126134	0.00522412		49.2	0.134781	0.107074	0.0611949	0.0344737	0.02057
49.4	0.10241	0.0699853	0.0415716	0.0130503	0.00516516		49.4	0.135115	0.106826	0.0615203	0.0347166	0.0207749
49.6	0.102932	0.0702227	0.0412719	0.0132087	0.0049819		49.6	0.135314	0.10663	0.0616558	0.0345601	0.0210685
49.8	0.103043	0.070519	0.0409043	0.0135637	0.00469002		49.8	0.136298	0.107322	0.0624848	0.0346287	0.0216755
50	0.103281	0.0711166	0.0410536	0.0141379	0.00469066		50	0.137088	0.108024	0.0627208	0.0348174	0.0219936
50.2	0.103447	0.0712766	0.0406948	0.0144879	0.00477626		50.2	0.136995	0.108131	0.0628439	0.0346711	0.0220169
50.4	0.103564	0.0713305	0.0403681	0.0153876	0.00490246		50.4	0.13756	0.108724	0.0633599	0.0349231	0.0221497
50.6	0.103971	0.070864	0.0404697	0.0160127	0.00518462		50.6	0.137965	0.108757	0.0637523	0.0352205	0.022231
50.8	0.10348	0.0702467	0.0401354	0.0159227	0.00494375		50.8	0.138184	0.108857	0.0635877	0.0348577	0.0223763
51	0.103595	0.0699643	0.0399794	0.0160578	0.00508847		51	0.138624	0.109267	0.0636103	0.0350994	0.0225055
51.2	0.103665	0.0698245	0.0399948	0.0161916	0.0049859		51.2	0.139393	0.109182	0.0638271	0.0353337	0.0227468
51.4	0.103703	0.0700946	0.040126	0.0162669	0.00458984		51.4	0.139571	0.109156	0.0640057	0.035211	0.0229707
51.6	0.10395	0.0703868	0.0403791	0.0160932	0.00441451		51.6	0.139781	0.109188	0.0646724	0.0353125	0.0229304
51.8	0.103539	0.070052	0.0403128	0.0153211	0.0040178		51.8	0.139986	0.108956	0.0647145	0.035244	0.0226468
52	0.103487	0.0696081	0.0405685	0.0148437	0.00337544		52	0.140188	0.109189	0.0645505	0.0352846	0.0221894
52.2	0.104016	0.0699492	0.0413104	0.0146162	0.00347122		52.2	0.14042	0.109182	0.0644817	0.0355924	0.022192
52.4	0.104677	0.0694873	0.0412707	0.0145544	0.00319038		52.4	0.140581	0.10977	0.0639748	0.0354899	0.0217505
52.6	0.105091	0.0700379	0.0412981	0.0145197	0.00323244		52.6	0.140666	0.110496	0.0644285	0.0364373	0.0223157
52.8	0.105706	0.0708289	0.0417825	0.0147781	0.00400991		52.8	0.140388	0.110637	0.0640897	0.0363154	0.0226352
53	0.106071	0.0714389	0.0424455	0.0149513	0.00425166		53	0.140191	0.110549	0.064289	0.0360777	0.022655
53.2	0.10679	0.0718846	0.0426136	0.0154115	0.00453696		53.2	0.140663	0.110772	0.0646125	0.0364359	0.0230151
53.4	0.107141	0.0717481	0.0423209	0.0151785	0.00463516		53.4	0.141137	0.11071	0.0646538	0.0369073	0.0231242
53.6	0.10808	0.0720323	0.0423472	0.0147027	0.00454976		53.6	0.141762	0.111498	0.0652321	0.0373022	0.0238297
53.8	0.108013	0.0723817	0.0422344	0.0148835	0.00458573		53.8	0.142224	0.112392	0.0661519	0.0382254	0.0244187
54	0.108596	0.0730681	0.0422742	0.0152806	0.00456894		54	0.142293	0.112997	0.0659095	0.0385894	0.0244339
54.2	0.1087	0.0731832	0.0418217	0.0150491	0.00433711		54.2	0.141661	0.112886	0.0662282	0.0386705	0.0242104
54.4	0.108228	0.0730152	0.0414837	0.0149325	0.0039606		54.4	0.141668	0.112892	0.066495	0.0384302	0.0242112
54.6	0.108217	0.0727119	0.0411621	0.0144525	0.00348988		54.6	0.141424	0.112511	0.0667624	0.0385047	0.0237762
54.8	0.108062	0.0725347	0.0404412	0.0145517	0.00322021		54.8	0.141449	0.112431	0.0671356	0.0385957	0.0241112
55	0.108014	0.0724553	0.0405818	0.0146107	0.00303222		55	0.141579	0.112798	0.0673094	0.038709	0.0242822
55.2	0.108112	0.0724164	0.0404844	0.014828	0.00247828		55.2	0.141771	0.112576	0.0681709	0.0388748	0.0240373
55.4	0.108156	0.0727603	0.0404327	0.0148938	0.00263227		55.4	0.142026	0.112974	0.068522	0.0390731	0.0240561
55.6	0.107923	0.0725631	0.0405889	0.0148778	0.0025548		55.6	0.142247	0.113175	0.0686541	0.0391598	0.0238057
55.8	0.107568	0.0720298	0.0405494	0.0147899	0.00245254		55.8	0.142247	0.112815	0.0685477	0.0388018	0.0233264
56	0.108075	0.0721599	0.0412135	0.0149598	0.00235844		56	0.142718	0.113485	0.0690044	0.0385071	0.023449
56.2	0.108599	0.0722321	0.0416885	0.0155566	0.00285856		56.2	0.142469	0.113342	0.068621	0.0378943	0.0232509
56.4	0.109068	0.072392	0.0416317	0.0160413	0.00317864		56.4	0.14265	0.113386	0.0681288	0.0371855	0.0228379
56.6	0.109212	0.0723345	0.041581	0.0162174	0.00363866		56.6	0.142848	0.114218	0.0682932	0.0374413	0.0233193
56.8	0.109332	0.0728397	0.0418872	0.0167912	0.00455308		56.8	0.143699	0.114639	0.0682943	0.0370971	0.0235058
57	0.110027	0.0732924	0.0422819	0.0167607	0.00526714		57	0.14424	0.114953	0.0676987	0.0368396	0.0229432
57.2	0.110199	0.0736708	0.0420195	0.0169175	0.00600838		57.2	0.145008	0.115725	0.0677697	0.0374608	0.0233848
57.4	0.110487	0.0733745	0.0425462	0.0164339	0.00643146		57.4	0.145483	0.115523	0.0675194	0.0380139	0.0235636
57.6	0.110793	0.0739016	0.0426017	0.0159277	0.00646929		57.6	0.146182	0.116126	0.0674591	0.0385087	0.0240844
57.8	0.111323	0.0746951	0.0431346	0.0160861	0.00655421		57.8	0.14592	0.115953	0.0668302	0.0385366	0.0235878
58	0.111842	0.0755265	0.0434333	0.0160915	0.00672464		58	0.146143	0.11631	0.0666645	0.0387565	0.0236044
58.2	0.111428	0.0753395	0.0431502	0.0155001	0.0063893		58.2	0.14602	0.116016	0.0668667	0.0387339	0.0233524
58.4	0.111508	0.0752006	0.0432763	0.0151874	0.00590668		58.4	0.146112	0.115888	0.0669068	0.0387335	0.0234167
58.6	0.112087	0.0752171	0.0432845	0.0149257	0.0056215		58.6	0.145934	0.115637	0.0669097	0.0387263	0.0231429
58.8	0.112423	0.0757289	0.043552	0.0152196	0.00583272		58.8	0.146331	0.115886	0.0676963	0.0392018	0.0237336
59	0.112381	0.0755657	0.0438885	0.0147925	0.00551672		59	0.146869	0.116331	0.0683827	0.0393934	0.0244723
59.2	0.113039	0.076066	0.0440169	0.0153262	0.00538757		59.2	0.147526	0.116209	0.0692458	0.0398964	0.0251213
59.4	0.112778	0.0762302	0.0437505	0.0151209	0.00499352		59.4	0.147945	0.116548	0.070041	0.0401991	0.0257337
59.6	0.113482	0.0768205	0.0443758	0.0158614	0.00502331		59.6	0.147837	0.11622	0.0704126	0.0402433	0.0256682
59.8	0.114187	0.0770062	0.0448395	0.0162649	0.00456607		59.8	0.148657	0.116027	0.0714275	0.040573	0.0258366
60	0.114783	0.0774721	0.045317	0.0162317	0.00444491		60	0.148403	0.116021	0.0715775	0.0399916	0.0255305
60.2	0.114918	0.0774807	0.0450991	0.016397	0.00428094		60.2	0.148181	0.115852	0.071495	0.0397162	0.025641
60.4	0.114505	0.0776417	0.0451076	0.0165264	0.00418815		60.4	0.148426	0.116015	0.0716536	0.0394613	0.0255787
60.6	0.114391	0.0773653	0.0448149	0.0167125	0.00403791		60.6	0.149082	0.117328	0.0730769	0.0402912	0.0266458
60.8	0.114329	0.0775736	0.044671	0.0170769	0.0040875		60.8	0.148992	0.117401	0.073203	0.0400644	0.0265767
61	0.11422	0.0776103	0.0449381	0.017025	0.00420843		61	0.14884	0.117512	0.0729087	0.0395112	0.0263778
61.2	0.1145	0.0780678	0.0454058	0.0175016	0.00444422		61.2	0.148707	0.117594	0.0728649	0.0396299	0.026492
61.4	0.114895	0.0782521	0.0461779	0.01763	0.00440183		61.4	0.149279	0.117509	0.0730337	0.0395786	0.0262217
61.6	0.115044	0.0788471	0.0463014	0.0174057	0.00439549		61.6	0.149131	0.117572	0.0727771	0.0391253	0.0256561
61.8	0.11555	0.078496	0.0465366	0.0175262	0.00489654		61.8	0.149038	0.117608	0.072652	0.0390563	0.0254226
62	0.115899	0.0789046	0.0468865	0.0182043	0.00566172		62	0.149	0.117771	0.0726364	0.0391551	0.0255016
62.2	0.115941	0.0789278	0.0468489	0.0183263	0.00559167		62.2	0.149081	0.117616	0.0720608	0.0390318	0.025402
62.4	0.116465	0.0787084	0.0470399	0.0183631	0.00583665		62.4	0.14876	0.117519	0.0716472	0.0387388	0.0254785
62.6	0.116226	0.0785074	0.0467185	0.0184028	0.00609725		62.6	0.148983	0.117873	0.0710901	0.0384902	0.0255867
62.8	0.116159	0.0786665	0.046562	0.0185218	0.00613237		62.8	0.149086	0.118419	0.0711752	0.0389084	0.0260624
63	0.116409	0.0787357	0.0463493	0.0182981	0.00635603		63	0.149129	0.11878	0.0712883	0.0386142	0.0266405
63.2	0.116759	0.0794159	0.0463073	0.0188875	0.00630426		63.2	0.149593	0.119245	0.0713591	0.0392638	0.027081
63.4	0.116962	0.0791816	0.046261	0.0185854	0.00596111		63.4	0.1498	0.119866	0.0714815	0.0395279	0.0273201
63.6	0.117765	0.0796777	0.0471039	0.0191389	0.00634324		63.6	0.150189	0.120009	0.0715916	0.0400442	0.0274256
63.8	0.117776	0.079667	0.0468507	0.0186042	0.00598138		63.8	0.150762	0.120502	0.0719173	0.0402588	0.0273434
64	0.117444	0.0798664	0.0468638	0.0177743	0.005831		64	0.150358	0.120659	0.0719469	0.0397947	0.0272438
64.2	0.1169	0.0797925	0.0462191	0.0174406	0.00534338		64.2	0.150236	0.120906	0.0726305	0.0399335	0.027886
64.4	0.116211	0.0799837	0.0460827	0.0170772	0.00483323		64.4	0.151023	0.121302	0.0735808	0.040399	0.0282785
64.6	0.116753	0.0804394	0.0460969	0.0173114	0.00500873		64.6	0.151297	0.121599	0.0743012	0.0410252	0.0284613
64.8	0.116877	0.0805957	0.0457291	0.0171565	0.00429624		64.8	0.15101	0.121312	0.0744032	0.0406508	0.0280463
65	0.116916	0.0808413	0.045906	0.0164737	0.00411281		65	0.151618	0.121159	0.074396	0.0404232	0.0275539
65.2	0.117735	0.0820074	0.0465144	0.0164376	0.004312		65.2	0.151786	0.12095	0.0742373	0.0404653	0.0268905
65.4	0.118324	0.0822823	0.0468753	0.016759	0.00429323		65.4	0.152491	0.121014	0.0748938	0.0406642	0.0271139
65.6	0.118473	0.0824128	0.046753	0.0163856	0.00427115		65.6	0.152636	0.120718	0.0748606	0.0404676	0.0270604
65.8	0.119583	0.0829751	0.0470442	0.0171836	0.00501348		65.8	0.152742	0.120889	0.0744518	0.0409084	0.0272773
66	0.120481	0.083909	0.0474856	0.0178991	0.00573579		66	0.15243	0.120404	0.0739778	0.0404916	0.0271182
66.2	0.120702	0.084116	0.0475221	0.0179614	0.00575233		66.2	0.152115	0.120313	0.0732422	0.0406859	0.026919
66.4	0.120818	0.0842204	0.0483148	0.0186203	0.00616244		66.4	0.152112	0.120416	0.07317	0.0401666	0.0269608
66.6	0.120841	0.0843999	0.0484967	0.018889	0.00673583		66.6	0.152619	0.121438	0.0731264	0.0402787	0.0270677
66.8	0.121219	0.0844996	0.0489966	0.0190006	0.00709782		66.8	0.152322	0.121735	0.0729836	0.0404694	0.0265644
67	0.121807	0.0846733	0.0493146	0.0193021	0.00744618		67	0.152523	0.121944	0.0729549	0.0402995	0.0263489
67.2	0.121852	0.0846584	0.0497264	0.0199661	0.00764623		67.2	0.153228	0.122272	0.0728935	0.0409057	0.0266974
67.4	0.121842	0.0844731	0.0503373	0.0200644	0.00764627		67.4	0.152981	0.12285	0.0731178	0.0411482	0.026833
67.6	0.121231	0.0845125	0.0503786	0.0200323	0.00787715		67.6	0.153535	0.123214	0.0738743	0.0416552	0.0268656
67.8	0.12056	0.0846787	0.0499964	0.0196727	0.00791026		67.8	0.153836	0.1234	0.0738899	0.0419121	0.0270301
68	0.120182	0.0845012	0.0499039	0.0192979	0.00762215		68	0.154063	0.123459	0.074025	0.042218	0.0270496
68.2	0.119372	0.0845446	0.0492441	0.0190505	0.00710526		68.2	0.154147	0.12338	0.0741185	0.042556	0.0269836
68.4	0.11941	0.0844173	0.0492681	0.0188351	0.00681671		68.4	0.154661	0.123433	0.0744214	0.0430542	0.0271109
68.6	0.119052	0.0838802	0.0487592	0.0183442	0.00654712		68.6	0.154564	0.123375	0.073982	0.0430138	0.0267147
68.8	0.118147	0.0828479	0.0475471	0.017351	0.00549024		68.8	0.15487	0.123442	0.0742141	0.0427338	0.0267325
69	0.118353	0.0826843	0.0474928	0.0172001	0.00557977		69	0.155082	0.122898	0.0736719	0.0424104	0.0264985
69.2	0.119584	0.0832246	0.0481987	0.0178625	0.00579109		69.2	0.155402	0.123094	0.0741149	0.0424394	0.0270873
69.4	0.120171	0.0832511	0.0483927	0.0183048	0.00546658		69.4	0.155771	0.123223	0.0743325	0.0424854	0.0277739
69.6	0.12018	0.0836464	0.0482231	0.0183455	0.00547469		69.6	0.155843	0.123346	0.0743424	0.0421678	0.0282119
69.8	0.120697	0.0837608	0.0488208	0.0188334	0.00581357		69.8	0.156021	0.122993	0.0742347	0.0421692	0.0282346
70	0.121614	0.0842872	0.0494769	0.0191324	0.00606852		70	0.156183	0.122591	0.0740708	0.04169	0.0282599
70.2	0.122128	0.084607	0.0500229	0.0190696	0.00565789		70.2	0.156087	0.122711	0.0741197	0.0420967	0.0281772
70.4	0.122786	0.0851273	0.0510802	0.0197903	0.00612974		70.4	0.156987	0.123228	0.0745268	0.0418594	0.0282783
70.6	0.123747	0.085314	0.0511443	0.0198675	0.00659489		70.6	0.157229	0.123426	0.0745987	0.0422717	0.0279411
70.8	0.124605	0.0858879	0.0518531	0.0204471	0.00698448		70.8	0.157501	0.123186	0.074545	0.0425777	0.0275041
71	0.12507	0.0864454	0.0523491	0.0210798	0.00741802		71	0.157872	0.123389	0.0745772	0.0426558	0.0272854
71.2	0.125592	0.0872482	0.0529106	0.0216587	0.00776345		71.2	0.157381	0.123504	0.0742151	0.0429865	0.0270702
71.4	0.12572	0.0876579	0.053173	0.021256	0.00766609		71.4	0.156728	0.123477	0.0738467	0.0430825	0.0265805
71.6	0.124925	0.0871625	0.0524602	0.0206223	0.00747152		71.6	0.157482	0.123739	0.0738136	0.0439477	0.0267791
71.8	0.124668	0.0873034	0.0523502	0.0207491	0.0074937		71.8	0.158079	0.124256	0.0737481	0.0445779	0.0271066
72	0.124863	0.0871019	0.0523959	0.0209854	0.0075351		72	0.158001	0.124572	0.0739679	0.0449649	0.0269617
72.2	0.124302	0.0870633	0.0519695	0.0208921	0.00718755		72.2	0.158019	0.124922	0.0739827	0.0451807	0.0270475
72.4	0.124498	0.0867998	0.0512141	0.020709	0.00691481		72.4	0.157691	0.125055	0.0739649	0.0450383	0.0268912
72.6	0.12437	0.0864553	0.0504027	0.0205069	0.00673881		72.6	0.157819	0.125354	0.0737143	0.0451076	0.0265211
72.8	0.124494	0.0862858	0.0500438	0.0207272	0.00682975		72.8	0.157575	0.125216	0.0736723	0.0449282	0.0264959
73	0.125334	0.0864702	0.0506749	0.0213828	0.00720212		73	0.157731	0.125326	0.0740491	0.0453551	0.0274787
73.2	0.125909	0.0867248	0.0512029	0.0218631	0.00729319		73.2	0.158527	0.12631	0.074975	0.0461257	0.0288633
73.4	0.125285	0.0866856	0.0508867	0.0220763	0.00711026		73.4	0.15913	0.126795	0.0752335	0.0467319	0.0297295
73.6	0.125349	0.0863338	0.0507915	0.0221672	0.00728069		73.6	0.159183	0.126675	0.0754497	0.0464411	0.029875
73.8	0.125546	0.0861928	0.0509683	0.0221762	0.00733308		73.8	0.159627	0.126604	0.0758173	0.0465751	0.0299527
74	0.126079	0.0867123	0.0510423	0.0221644	0.00730256		74	0.159936	0.127244	0.0762465	0.0469446	0.0306304
74.2	0.126335	0.0864376	0.0510038	0.0217271	0.0070011		74.2	0.16008	0.12749	0.0761823	0.0470961	0.0308807
74.4	0.12688	0.0868262	0.0516256	0.0222863	0.00758367		74.4	0.160605	0.128184	0.0764474	0.0475057	0.03129
74.6	0.127723	0.0871367	0.0518916	0.0224192	0.00762342		74.6	0.160442	0.12799	0.0765671	0.0476312	0.0314507
74.8	0.128371	0.088001	0.0525509	0.0229437	0.00813798		74.8	0.160584	0.128056	0.0766604	0.0475534	0.031366
75	0.127768	0.0874438	0.0519604	0.0220197	0.00755555		75	0.160507	0.128722	0.0768887	0.0473484	0.0308678
75.2	0.127867	0.0875315	0.052005	0.0212447	0.00683037		75.2	0.159643	0.128522	0.0762793	0.046954	0.0302909
75.4	0.127318	0.0863329	0.0514619	0.0202497	0.00617265		75.4	0.159507	0.128408	0.0761356	0.0462493	0.0298323
75.6	0.12701	0.0861012	0.0515433	0.0200786	0.00619837		75.6	0.160256	0.128625	0.0766419	0.0462196	0.0298056
75.8	0.127154	0.0863345	0.0517421	0.0203822	0.00634857		75.8	0.159987	0.128627	0.076816	0.0453969	0.0292872
76	0.127523	0.0865275	0.0515379	0.0206785	0.00646894		76	0.16002	0.12867	0.0770735	0.0452921	0.0290542
76.2	0.128106	0.0867483	0.0510786	0.0205158	0.00587236		76.2	0.160267	0.12876	0.0771652	0.0449639	0.0285836
76.4	0.128292	0.0864952	0.0507248	0.0204528	0.00564849		76.4	0.160276	0.129069	0.0774079	0.0447406	0.0281385
76.6	0.128648	0.0864568	0.0507285	0.0205903	0.00594954		76.6	0.160442	0.129004	0.0773461	0.0447191	0.0279484
76.8	0.128783	0.086768	0.051062	0.0206611	0.00626341		76.8	0.160679	0.128906	0.0773773	0.0446074	0.0282766
77	0.129071	0.0873415	0.0515894	0.0209208	0.00672996		77	0.161287	0.129451	0.0781063	0.0452378	0.0290066
77.2	0.129214	0.0878125	0.0517751	0.0214136	0.00681401		77.2	0.161758	0.129922	0.0785889	0.0457869	0.0294268
77.4	0.129378	0.0881652	0.0519294	0.0216782	0.00707461		77.4	0.162234	0.129842	0.0788061	0.0461664	0.0291671
77.6	0.130381	0.0887528	0.0522686	0.0217173	0.00777526		77.6	0.162271	0.129509	0.0787639	0.0458396	0.0288459
77.8	0.131071	0.0897035	0.0528696	0.0221285	0.0084081		77.8	0.163047	0.130481	0.0792674	0.0467844	0.029636
78	0.131545	0.0908471	0.0536218	0.0228815	0.00915517		78	0.163834	0.130748	0.0796185	0.0473806	0.0302268
78.2	0.132009	0.0912846	0.05408	0.0228303	0.00969806		78.2	0.164531	0.131021	0.0795247	0.0479412	0.0304814
78.4	0.132541	0.0921276	0.0546208	0.0232166	0.0107209		78.4	0.164894	0.131085	0.0800968	0.0483765	0.0305908
78.6	0.132742	0.0924253	0.0550611	0.0236411	0.0107004		78.6	0.165425	0.130884	0.0806444	0.0486516	0.0311574
78.8	0.132814	0.0934232	0.0551189	0.0241615	0.011266		78.8	0.166007	0.131203	0.0808343	0.0488329	0.0311961
79	0.132625	0.0931705	0.0548676	0.0235983	0.0109284		79	0.165708	0.131512	0.0805515	0.0485588	0.0307146
79.2	0.132949	0.0928871	0.0549669	0.0240594	0.0104575		79.2	0.165101	0.13077	0.0799468	0.0477679	0.030794
79.4	0.13276	0.0925607	0.0547461	0.0242791	0.0102357		79.4	0.164577	0.130347	0.0797213	0.0467879	0.0304217
79.6	0.133382	0.0935145	0.0556869	0.02515	0.0106636		79.6	0.164675	0.130192	0.0800154	0.0464188	0.0304035
79.8	0.133402	0.0932991	0.0554542	0.0254215	0.0104152		79.8	0.164705	0.130422	0.0803629	0.0465224	0.0307818
80	0.133566	0.0927419	0.0550283	0.0257624	0.0102582		80	0.165105	0.130932	0.0802867	0.046728	0.0310603
80.2	0.133512	0.0922258	0.0547858	0.0255141	0.00995401		80.2	0.165151	0.130811	0.080283	0.0463889	0.0311131
80.4	0.133434	0.0921086	0.0550776	0.0258738	0.0100943		80.4	0.165299	0.131091	0.0805861	0.0458138	0.0311615
80.6	0.133148	0.0921339	0.0547872	0.0257285	0.00952515		80.6	0.165052	0.130434	0.080312	0.0449848	0.0309676
80.8	0.132754	0.0919669	0.0547142	0.0257048	0.00898851		80.8	0.164774	0.130363	0.0799902	0.0447456	0.030603
81	0.132684	0.0915809	0.0546921	0.0254895	0.00848927		81	0.164621	0.130452	0.0799502	0.0447256	0.0305796
81.2	0.132387	0.0918105	0.0548935	0.0257286	0.0083086		81.2	0.164649	0.130214	0.0796841	0.0445006	0.0306449
81.4	0.132988	0.0921975	0.0553173	0.0258431	0.00848226		81.4	0.164902	0.129817	0.0793716	0.0445497	0.0302627
81.6	0.133583	0.0924607	0.0553057	0.0255388	0.00843571		81.6	0.165011	0.130136	0.0796778	0.0451416	0.0310041
81.8	0.133616	0.0925239	0.0559582	0.0259236	0.00848593		81.8	0.165445	0.130533	0.0795452	0.0458777	0.0317153
82	0.133275	0.0928081	0.056168	0.0257539	0.00856342		82	0.165775	0.130614	0.0793993	0.0462329	0.0314182
82.2	0.132835	0.0926747	0.055719	0.0251649	0.00865342		82.2	0.166228	0.131069	0.079283	0.046581	0.0311275
82.4	0.132524	0.092903	0.0555032	0.0244141	0.00836046		82.4	0.166349	0.130918	0.0789091	0.046926	0.0310291
82.6	0.13292	0.0932159	0.0559723	0.0246859	0.00812647		82.6	0.166306	0.131021	0.0787358	0.0475828	0.031369
82.8	0.133574	0.0936415	0.0560007	0.0247023	0.00829628		82.8	0.165994	0.131266	0.0783422	0.047467	0.031103
83	0.134138	0.0935809	0.0560451	0.0247385	0.00812238		83	0.165372	0.131568	0.0782866	0.0474026	0.0308803
83.2	0.134407	0.0936339	0.0559715	0.0245066	0.00785668		83.2	0.165393	0.131365	0.0784304	0.0476101	0.0312368
83.4	0.134807	0.0940176	0.0562475	0.0245353	0.00817027		83.4	0.165542	0.131922	0.0787503	0.0478245	0.0308045
83.6	0.135672	0.0944322	0.0565793	0.0249699	0.00876916		83.6	0.166191	0.132547	0.0794475	0.0487277	0.0307378
83.8	0.136288	0.0942795	0.0566379	0.0250506	0.00922293		83.8	0.167036	0.133279	0.0800823	0.0494658	0.0309389
84	0.136372	0.0938774	0.0564869	0.0250636	0.00970742		84	0.167346	0.13331	0.0804841	0.0497835	0.0308155
84.2	0.137045	0.0944743	0.0568071	0.025136	0.00994419		84.2	0.167707	0.133752	0.0817394	0.0498431	0.0310508
84.4	0.137293	0.0943687	0.0570663	0.0253578	0.00990086		84.4	0.167511	0.133888	0.0820525	0.0494951	0.0307271
84.6	0.136721	0.0935903	0.0565239	0.0244825	0.00941917		84.6	0.168083	0.134075	0.082421	0.0494535	0.0308319
84.8	0.13661	0.0929463	0.056228	0.0242343	0.00936788		84.8	0.168744	0.134574	0.0828564	0.049743	0.0311685
85	0.13712	0.0927923	0.0568065	0.0243634	0.0101574		85	0.169245	0.134488	0.0829901	0.0495624	0.0314044
85.2	0.137025	0.0934956	0.057125	0.0246171	0.0106081		85.2	0.169116	0.134718	0.0830152	0.0493013	0.031604
85.4	0.137792	0.0937037	0.0576284	0.0249853	0.0110057		85.4	0.16924	0.134842	0.0833041	0.0498187	0.0318721
85.6	0.13723	0.0937713	0.057434	0.0249625	0.0106648		85.6	0.169267	0.134762	0.0838752	0.0497945	0.0324209
85.8	0.136777	0.0942446	0.0579663	0.0251746	0.01091		85.8	0.169271	0.134505	0.0831118	0.0492778	0.0318083
86	0.136202	0.0945992	0.0577681	0.0246814	0.0107676		86	0.169453	0.134409	0.0830021	0.0490427	0.0313483
86.2	0.136272	0.095425	0.0577525	0.0249685	0.0109064		86.2	0.169278	0.134166	0.0822052	0.048797	0.0308144
86.4	0.136179	0.0961721	0.0581377	0.0244153	0.0105439		86.4	0.169324	0.134033	0.0816978	0.0491073	0.0311152
86.6	0.136329	0.0962122	0.0584681	0.0243318	0.0104072		86.6	0.169028	0.133917	0.0815459	0.0486169	0.0312422
86.8	0.136289	0.0961498	0.058119	0.024425	0.0101858		86.8	0.168774	0.133844	0.0813737	0.0482343	0.0313952
87	0.136601	0.0969436	0.0583209	0.0246051	0.0104035		87	0.168714	0.133425	0.0810462	0.0481531	0.0310717
87.2	0.136972	0.097617	0.0583179	0.0244131	0.0103432		87.2	0.169206	0.133113	0.0807924	0.0483577	0.0313808
87.4	0.136665	0.0977559	0.0584172	0.0245283	0.0100337		87.4	0.169321	0.1334	0.0811446	0.0486301	0.0313617
87.6	0.137156	0.09806	0.0585482	0.0250689	0.010456		87.6	0.169421	0.13317	0.0811031	0.0488434	0.0313845
87.8	0.137373	0.0984318	0.0587821	0.0253629	0.0104936		87.8	0.168955	0.133169	0.0808758	0.0484634	0.0313739
88	0.137367	0.0984862	0.0587614	0.0256115	0.0103808		88	0.168806	0.133039	0.0811552	0.0485061	0.0314178
88.2	0.13812	0.0985546	0.0593732	0.0258187	0.0101458		88.2	0.169181	0.134035	0.0815558	0.0487686	0.0317166
88.4	0.138201	0.0981883	0.0594989	0.0257392	0.0103029		88.4	0.169464	0.13395	0.0812654	0.0483951	0.031431
88.6	0.13851	0.097612	0.0593235	0.0251519	0.0104962		88.6	0.170132	0.134172	0.081681	0.0486146	0.0319147
88.8	0.138851	0.0975709	0.0593525	0.0251863	0.0108467		88.8	0.170386	0.134598	0.0818095	0.0489422	0.0321077
89	0.138948	0.0969723	0.0590923	0.024875	0.010944		89	0.17035	0.13497	0.0818318	0.0493448	0.0318572
89.2	0.139524	0.0972028	0.0593921	0.0251822	0.0112223		89.2	0.169996	0.13554	0.0821523	0.049475	0.0317855
89.4	0.13985	0.0969345	0.059281	0.0253677	0.011594		89.4	0.170503	0.135292	0.0824118	0.049521	0.0314011
89.6	0.139384	0.0964051	0.0586022	0.0253937	0.010968		89.6	0.17031	0.135033	0.0823838	0.0490836	0.0308674
89.8	0.139825	0.0963858	0.058757	0.025268	0.0113466		89.8	0.170706	0.135641	0.0826878	0.0492484	0.0307359
90	0.140272	0.0966477	0.0586015	0.0254472	0.0115325		90	0.17106	0.135943	0.0826767	0.049092	0.0307025
90.2	0.140754	0.0966718	0.0584056	0.0252658	0.0116483		90.2	0.170792	0.136466	0.0828088	0.0489816	0.0306129
90.4	0.140291	0.0961193	0.0579363	0.0245953	0.0111407		90.4	0.17117	0.136805	0.0833552	0.0486896	0.0309763
90.6	0.140127	0.0960991	0.0578358	0.025029	0.0112536		90.6	0.170919	0.136932	0.0834799	0.0481746	0.0311198
90.8	0.139432	0.0958689	0.0576672	0.0255481	0.0113346		90.8	0.171338	0.13707	0.0839078	0.0486724	0.0316018
91	0.139887	0.0966561	0.0583638	0.026033	0.0113863		91	0.171976	0.137113	0.0841896	0.0488527	0.0317745
91.2	0.140265	0.0970502	0.058412	0.02623	0.0114704		91.2	0.172559	0.138193	0.0850592	0.049298	0.0325834
91.4	0.140323	0.0971034	0.0586927	0.0263109	0.0113993		91.4	0.172628	0.138378	0.0856848	0.0494847	0.0328041
91.6	0.140943	0.097288	0.0586485	0.0268182	0.0115401		91.6	0.172572	0.138342	0.0858467	0.0492999	0.0333472
91.8	0.141081	0.0974797	0.058987	0.0268033	0.0111631		91.8	0.172248	0.138327	0.0856083	0.0488598	0.033257
92	0.141446	0.0977563	0.0598933	0.0270521	0.0115215		92	0.172692	0.138423	0.0856928	0.0493402	0.0333926
92.2	0.141588	0.0978461	0.060259	0.0266258	0.0112855		92.2	0.173247	0.138914	0.086026	0.0498573	0.0338579
92.4	0.141535	0.0980541	0.0602217	0.0262835	0.0113695		92.4	0.173253	0.138825	0.0858061	0.0498318	0.0338696
92.6	0.141834	0.0982415	0.0602611	0.0256857	0.0112271		92.6	0.173347	0.138835	0.0858575	0.050704	0.0339791
92.8	0.141574	0.0982667	0.0602186	0.0255735	0.0109397		92.8	0.173893	0.13954	0.0858346	0.0515666	0.0343876
93	0.141687	0.0982347	0.0605088	0.0255978	0.0105807		93	0.173999	0.139699	0.0853275	0.0523649	0.0338741
93.2	0.142257	0.0987468	0.0610775	0.0261623	0.0106191		93.2	0.173748	0.139003	0.0847811	0.0521169	0.0336696
93.4	0.142119	0.0984611	0.0606643	0.0258629	0.0103027		93.4	0.173965	0.137943	0.0836029	0.0517363	0.0330218
93.6	0.142265	0.0985474	0.0602244	0.0262169	0.00980126		93.6	0.173433	0.13765	0.0830711	0.0517454	0.032567
93.8	0.142766	0.0993122	0.0610465	0.0263668	0.0106078		93.8	0.173931	0.137601	0.0833446	0.0516052	0.0327307
94	0.143023	0.0997352	0.0605347	0.0264489	0.0105755		94	0.173772	0.137437	0.0828122	0.0510445	0.0323226
94.2	0.14283	0.099445	0.0601648	0.0264683	0.0103593		94.2	0.173944	0.137363	0.0830489	0.0507033	0.0326366
94.4	0.142865	0.0996127	0.0603879	0.0267585	0.0103059		94.4	0.174542	0.137733	0.0830461	0.0506702	0.0329093
94.6	0.14291	0.0999399	0.0609297	0.0277054	0.0105784		94.6	0.175046	0.138318	0.0832395	0.0510941	0.0334098
94.8	0.143105	0.0996412	0.0612449	0.0278988	0.0103385		94.8	0.17571	0.138409	0.0836358	0.0512592	0.0338226
95	0.144242	0.100108	0.0614779	0.0283735	0.0102781		95	0.175483	0.138784	0.0835774	0.051019	0.0337754
95.2	0.144761	0.0997283	0.0614007	0.0280302	0.0105428		95.2	0.175978	0.139797	0.0844056	0.0513408	0.0341625
95.4	0.144627	0.0989874	0.0604126	0.0272979	0.00985269		95.4	0.176679	0.139594	0.0846912	0.0513273	0.0346196
95.6	0.144306	0.098391	0.0598653	0.0267818	0.00931001		95.6	0.176258	0.139373	0.0842893	0.0509664	0.0346033
95.8	0.143485	0.0978975	0.0597185	0.0260075	0.00928422		95.8	0.176609	0.139725	0.0844101	0.050846	0.0344975
96	0.143195	0.0978022	0.0593479	0.0260663	0.00953899		96	0.176468	0.140088	0.0841239	0.0511373	0.0342422
96.2	0.14336	0.0981512	0.0589194	0.0262915	0.00979622		96.2	0.176982	0.140883	0.0848256	0.0513296	0.0346501
96.4	0.14388	0.0984229	0.0589565	0.0267302	0.0103874		96.4	0.177086	0.141503	0.0850743	0.0515168	0.0346434
96.6	0.144192	0.0990395	0.0592759	0.0273074	0.0107352		96.6	0.17765	0.142073	0.0853651	0.0521885	0.0347978
96.8	0.144493	0.0993302	0.0597562	0.0281571	0.0111636		96.8	0.178408	0.143077	0.0857757	0.0525417	0.0352066
97	0.145307	0.10001	0.0602551	0.0287994	0.0113247		97	0.178488	0.142609	0.0856945	0.0524605	0.0345072
97.2	0.145091	0.0999793	0.0598877	0.0288696	0.0110376		97.2	0.17845	0.142369	0.0861536	0.0522207	0.0349403
97.4	0.145139	0.0998708	0.0597018	0.0288803	0.0113392		97.4	0.178538	0.142171	0.085901	0.0519743	0.0344902
97.6	0.145334	0.100497	0.0595822	0.0294451	0.0115036		97.6	0.178891	0.142641	0.0868789	0.0522907	0.0349365
97.8	0.146218	0.101548	0.0610136	0.0299893	0.0122663		97.8	0.179555	0.142633	0.0873362	0.0522001	0.035176
98	0.146409	0.102201	0.0610286	0.0303253	0.011902		98	0.179695	0.142843	0.0876217	0.0523989	0.0351784
98.2	0.146859	0.102919	0.062081	0.0308634	0.0120848		98.2	0.180217	0.142817	0.0877879	0.0524346	0.0356449
98.4	0.147178	0.103213	0.0622534	0.0304873	0.0119027		98.4	0.180153	0.143136	0.0877218	0.0522366	0.0358172
98.6	0.147559	0.103448	0.0629329	0.030718	0.0115248		98.6	0.179391	0.142567	0.0873143	0.0518515	0.035835
98.8	0.147884	0.104384	0.0629639	0.0304834	0.0110087		98.8	0.178706	0.142406	0.0871548	0.0517104	0.0357201
99	0.147974	0.104805	0.0628521	0.0305106	0.0109443		99	0.178822	0.14252	0.0873333	0.0518951	0.0357753
99.2	0.147911	0.104677	0.0626479	0.0293643	0.010639		99.2	0.179439	0.142616	0.0880775	0.0523366	0.0360506
99.4	0.148165	0.104564	0.0619972	0.0290879	0.0101195		99.4	0.17903	0.142142	0.0881677	0.0524169	0.0358825
99.6	0.148007	0.104422	0.0621261	0.028801	0.0102073		99.6	0.17844	0.141935	0.0877586	0.0521175	0.0349529
99.8	0.147725	0.103975	0.0616554	0.0280042	0.010059		99.8	0.178995	0.142636	0.0881108	0.052447	0.035237
100	0.148371	0.104361	0.0617523	0.0283357	0.0104192		100	0.179189	0.142871	0.0877622	0.0525434	0.0348221
100.2	0.148399	0.104307	0.0620834	0.0282417	0.0108152		100.2	0.179658	0.143613	0.0884565	0.0525251	0.0350462
100.4	0.148913	0.104184	0.0623804	0.027995	0.0109829		100.4	0.180037	0.144114	0.0886424	0.0528558	0.0346616
100.6	0.149041	0.103664	0.0623336	0.0278805	0.0105884		100.6	0.180911	0.144734	0.0892667	0.0532781	0.0349866
100.8	0.149529	0.103348	0.06231	0.028042	0.010544		100.8	0.181551	0.145312	0.0900044	0.0534586	0.0351315
101	0.14997	0.103238	0.0622245	0.027942	0.0108651		101	0.181726	0.145103	0.0898575	0.0533158	0.0349558
101.2	0.149073	0.102297	0.0613761	0.0273932	0.0102684		101.2	0.181349	0.144972	0.0896849	0.053449	0.034663
101.4	0.148978	0.10173	0.0612108	0.0275114	0.0101516		101.4	0.182371	0.145159	0.0900521	0.0536292	0.0348807
101.6	0.149659	0.102159	0.061772	0.0276562	0.0102801		101.6	0.182817	0.145076	0.0899515	0.0535395	0.0348456
101.8	0.150035	0.102344	0.0624895	0.027584	0.0101759		101.8	0.183286	0.144986	0.0900465	0.0539372	0.0348312
102	0.14939	0.102068	0.0625114	0.0274994	0.00975139		102	0.183095	0.145116	0.0898709	0.0538254	0.0351427
102.2	0.149266	0.101897	0.062486	0.0271921	0.00962813		102.2	0.18307	0.145023	0.0892429	0.0534483	0.0357174
102.4	0.149106	0.101668	0.0621945	0.0269044	0.00938753		102.4	0.182843	0.145112	0.089026	0.0533235	0.0361588
102.6	0.149635	0.10234	0.0630164	0.0274499	0.00975792		102.6	0.182198	0.14464	0.0885805	0.0532751	0.0359987
102.8	0.149567	0.103336	0.0633489	0.0274461	0.0097338		102.8	0.18216	0.144873	0.0887143	0.0536124	0.0359188
103	0.150209	0.103713	0.0639105	0.0283544	0.0107005		103	0.182579	0.145131	0.088528	0.053647	0.0363951
103.2	0.150219	0.103645	0.0641378	0.0284133	0.0108381		103.2	0.18238	0.145362	0.0884676	0.0537975	0.0364258
103.4	0.150861	0.103758	0.0642681	0.0289282	0.0114065		103.4	0.181857	0.145362	0.0879081	0.053628	0.0362303
103.6	0.150585	0.10347	0.0641867	0.0287375	0.0112632		103.6	0.182554	0.145602	0.088094	0.0537287	0.0365384
103.8	0.15081	0.103398	0.0641155	0.0288436	0.0114636		103.8	0.182434	0.145576	0.088163	0.0535577	0.0368904
104	0.15118	0.103982	0.0642917	0.0298278	0.0120009		104	0.182789	0.145676	0.0884205	0.0534622	0.0370271
104.2	0.151286	0.103916	0.0640801	0.0300612	0.0119324		104.2	0.183092	0.146135	0.0893092	0.0534712	0.0374163
104.4	0.152455	0.10431	0.0640216	0.0305382	0.012328		104.4	0.183801	0.146652	0.0902814	0.0545505	0.0380018
104.6	0.153455	0.104851	0.0641513	0.031447	0.0128076		104.6	0.18412	0.146862	0.0909636	0.0549005	0.0386676
104.8	0.154056	0.105693	0.0644229	0.0320657	0.0137488		104.8	0.184098	0.146785	0.0912931	0.0550646	0.0386898
105	0.154451	0.106283	0.0648608	0.0327156	0.0142656		105	0.184092	0.14641	0.0913383	0.0550367	0.0384827
105.2	0.154443	0.106195	0.0642843	0.0328533	0.0137843		105.2	0.183819	0.146076	0.0915553	0.0552548	0.0383597
105.4	0.155065	0.10685	0.0649703	0.0334766	0.0140261		105.4	0.184711	0.146598	0.092461	0.0552954	0.0389892
105.6	0.155112	0.106967	0.0651747	0.033091	0.0137449		105.6	0.18441	0.146591	0.0924876	0.0552077	0.0386898
105.8	0.15426	0.106858	0.0651728	0.0325481	0.0132734		105.8	0.184836	0.146482	0.0929177	0.0554408	0.0389928
106	0.153409	0.106698	0.0655013	0.0325026	0.0133254		106	0.184143	0.146218	0.0924333	0.0548152	0.0386007
106.2	0.153085	0.106921	0.0652647	0.0320302	0.0131674		106.2	0.184759	0.146169	0.0923115	0.0551098	0.0382862
106.4	0.153414	0.10746	0.0658072	0.0322409	0.0134888		106.4	0.184492	0.146383	0.0920049	0.0551685	0.037657
106.6	0.153474	0.108479	0.0660576	0.0320443	0.0137057		106.6	0.184075	0.146249	0.0915056	0.0546948	0.0368255
106.8	0.153085	0.10888	0.0661698	0.0317998	0.0135192		106.8	0.183697	0.145732	0.0910099	0.0544428	0.0362242
107	0.153227	0.108654	0.0661274	0.0320536	0.0139319		107	0.184191	0.146198	0.0905943	0.0544697	0.0362324
107.2	0.153339	0.1085	0.0662254	0.0314861	0.0136107		107.2	0.18463	0.146034	0.0905911	0.0544996	0.035922
107.4	0.153587	0.107858	0.0659526	0.030882	0.0130934		107.4	0.184756	0.146045	0.0906582	0.054901	0.0360282
107.6	0.153991	0.108071	0.0659302	0.0308465	0.0130159		107.6	0.18518	0.145864	0.0907982	0.0549732	0.0356095
107.8	0.154555	0.107934	0.0656205	0.0305401	0.0130117		107.8	0.184956	0.146012	0.0907597	0.0549008	0.0353443
108	0.154822	0.108491	0.065141	0.0303677	0.0126553		108	0.186032	0.147176	0.0914807	0.0559216	0.0358164
108.2	0.155143	0.108701	0.0649199	0.0299827	0.0123023		108.2	0.18642	0.147301	0.0917807	0.0565309	0.0360849
108.4	0.155627	0.109155	0.065292	0.0300737	0.013099		108.4	0.186876	0.147801	0.0921646	0.0573439	0.0367521
108.6	0.156059	0.109226	0.0655274	0.0302515	0.0133536		108.6	0.1865	0.147938	0.0918657	0.0569037	0.0366305
108.8	0.156123	0.109133	0.065518	0.0302102	0.0134332		108.8	0.186409	0.148417	0.0919254	0.0571394	0.0365777
109	0.156256	0.108795	0.0656382	0.0303496	0.0133149		109	0.186564	0.14862	0.0916214	0.0571711	0.0365878
109.2	0.156292	0.108596	0.065426	0.0303717	0.0129152		109.2	0.186542	0.148971	0.0915688	0.0574759	0.0367694
109.4	0.156106	0.108587	0.065502	0.0306976	0.0128767		109.4	0.187112	0.149898	0.0919465	0.0576248	0.0372932
109.6	0.155308	0.10794	0.065208	0.0303831	0.0125322		109.6	0.186818	0.150051	0.0916389	0.057497	0.0373035
109.8	0.155123	0.1081	0.0654627	0.0301911	0.0125998		109.8	0.186365	0.149713	0.0909762	0.0570421	0.0372994
110	0.154918	0.10772	0.0652496	0.0304759	0.0127088		110	0.186024	0.149945	0.0910518	0.0570337	0.0374386
110.2	0.155174	0.108167	0.0649042	0.0307639	0.0126717		110.2	0.185862	0.149903	0.090809	0.0570759	0.0376425
110.4	0.155732	0.108962	0.0653176	0.0309856	0.0131439		110.4	0.185598	0.149935	0.0907096	0.0568171	0.0380559
110.6	0.155615	0.109392	0.0650813	0.0311676	0.0132662		110.6	0.186068	0.149583	0.0911882	0.0566343	0.0383835
110.8	0.155882	0.109378	0.0654963	0.031452	0.0133647		110.8	0.185976	0.148877	0.0909457	0.0564665	0.0380369
111	0.156303	0.109568	0.0664742	0.0316523	0.0133853		111	0.186658	0.149545	0.0910071	0.0568009	0.0383443
111.2	0.157079	0.11028	0.0671357	0.0320432	0.0135679		111.2	0.187024	0.149072	0.0909415	0.0565385	0.0381446
111.4	0.157351	0.110094	0.0674277	0.0322322	0.0136352		111.4	0.187154	0.149166	0.0912188	0.0568979	0.0383134
111.6	0.157725	0.111365	0.0681814	0.0325431	0.0143505		111.6	0.187523	0.149166	0.0910878	0.0566032	0.0380096
111.8	0.157534	0.110878	0.0678331	0.0322119	0.0140027		111.8	0.188003	0.14976	0.0918691	0.0570737	0.0386237
112	0.15713	0.110894	0.0678352	0.0320099	0.013882		112	0.18848	0.149968	0.0918593	0.0571702	0.0387985
112.2	0.156728	0.110957	0.0681376	0.0324707	0.0139349		112.2	0.188644	0.149778	0.091708	0.0572262	0.0392161
112.4	0.156661	0.110926	0.0684208	0.032684	0.0142797		112.4	0.189007	0.150265	0.0920682	0.0571935	0.039393
112.6	0.157182	0.110338	0.068678	0.032939	0.0143423		112.6	0.18882	0.150417	0.0917122	0.056929	0.0389571
112.8	0.157421	0.110441	0.0686977	0.0331405	0.0145817		112.8	0.188953	0.150809	0.0915399	0.0568807	0.0386784
113	0.157454	0.110162	0.06861	0.0328893	0.0148174		113	0.189399	0.151215	0.0912539	0.0571064	0.0387189
113.2	0.157548	0.110293	0.0682538	0.0331269	0.0147598		113.2	0.189861	0.151522	0.0916991	0.057064	0.0387971
113.4	0.157878	0.110663	0.0680977	0.0332543	0.0151363		113.4	0.190424	0.151934	0.0924555	0.0568659	0.0391233
113.6	0.158399	0.11082	0.0683196	0.033174	0.0154959		113.6	0.19	0.151556	0.0924756	0.0565428	0.0388818
113.8	0.158807	0.110712	0.0683159	0.0330804	0.0154939		113.8	0.190164	0.151488	0.092793	0.0565923	0.0393289
114	0.158805	0.110993	0.0678142	0.0332294	0.0153513		114	0.190263	0.151275	0.0931168	0.0562044	0.0392311
114.2	0.159107	0.111615	0.0677966	0.0331048	0.0155884		114.2	0.190364	0.151445	0.0931764	0.0559149	0.039206
114.4	0.159616	0.111757	0.0679075	0.0331683	0.0156117		114.4	0.190904	0.151674	0.0933232	0.0557026	0.0395376
114.6	0.160218	0.111799	0.0682244	0.0332965	0.0154922		114.6	0.191045	0.151501	0.0932239	0.0558141	0.0392883
114.8	0.16064	0.112003	0.0686726	0.0332409	0.014993		114.8	0.191059	0.151339	0.0933528	0.0559901	0.0390781
115	0.160935	0.112452	0.0692979	0.0340105	0.0151877		115	0.191703	0.151814	0.0939664	0.0568728	0.0396356
115.2	0.161156	0.1126	0.0690465	0.0341427	0.0152977		115.2	0.19172	0.151709	0.0940916	0.0570167	0.0395617
115.4	0.160755	0.112063	0.0690291	0.0334852	0.0150258		115.4	0.191874	0.152096	0.0943326	0.0578088	0.0395821
115.6	0.160596	0.112545	0.0693206	0.0335414	0.0151358		115.6	0.192244	0.152702	0.0946313	0.0579441	0.03963
115.8	0.160383	0.112241	0.0691823	0.0333049	0.0146605		115.8	0.192239	0.152413	0.0947995	0.058176	0.0398427
116	0.16032	0.112188	0.0691151	0.0329196	0.0143601		116	0.191697	0.152244	0.0941558	0.0580414	0.0393403
116.2	0.1601	0.112116	0.0696632	0.032951	0.0139059		116.2	0.191495	0.152298	0.0940711	0.0585051	0.0390969
116.4	0.160006	0.111804	0.0694498	0.032716	0.0135063		116.4	0.191211	0.152011	0.0937907	0.058397	0.0384832
116.6	0.160278	0.111179	0.06969	0.0326106	0.0135262		116.6	0.191246	0.152449	0.0936985	0.0589325	0.0385996
116.8	0.160349	0.110844	0.0690496	0.0323838	0.0129521		116.8	0.191562	0.152733	0.0935882	0.058766	0.0386953
117	0.160291	0.110704	0.0693353	0.0323398	0.0131623		117	0.192145	0.153124	0.0938006	0.0592075	0.039058
117.2	0.160838	0.111134	0.0695756	0.0325343	0.0135452		117.2	0.192667	0.152773	0.0941542	0.0589055	0.0387252
117.4	0.161142	0.111235	0.0695856	0.0326517	0.0138489		117.4	0.192446	0.152487	0.0945311	0.0588326	0.0386111
117.6	0.161629	0.111436	0.0699628	0.0328009	0.0143338		117.6	0.193023	0.152947	0.0947765	0.0592961	0.0387735
117.8	0.161519	0.111268	0.0698804	0.0330428	0.0143928		117.8	0.193364	0.15291	0.0944028	0.059013	0.0386491
118	0.161656	0.111874	0.0698138	0.0331606	0.0142044		118	0.193367	0.152843	0.094142	0.0583137	0.038078
118.2	0.162109	0.111766	0.070165	0.033706	0.0148521		118.2	0.193665	0.153432	0.094195	0.0583715	0.0384722
118.4	0.162784	0.111847	0.0706779	0.0342479	0.015167		118.4	0.194294	0.154017	0.0939356	0.0587972	0.0387685
118.6	0.162563	0.112189	0.0707796	0.0343566	0.0153612		118.6	0.1944	0.154211	0.094279	0.059331	0.0389619
118.8	0.161977	0.111888	0.0701406	0.0345279	0.0151395		118.8	0.19488	0.155061	0.0948053	0.0596046	0.0393894
119	0.162232	0.11264	0.0707513	0.0352264	0.0161715		119	0.195111	0.155981	0.0952084	0.0601431	0.0397967
119.2	0.161667	0.112606	0.0703565	0.0345123	0.0159145		119.2	0.194886	0.155534	0.0948274	0.0596564	0.039351
119.4	0.161607	0.112835	0.0703507	0.0345378	0.016146		119.4	0.194667	0.155559	0.094515	0.0592429	0.039217
119.6	0.161914	0.113432	0.0706665	0.0347227	0.0164823		119.6	0.194504	0.155558	0.0944765	0.0588003	0.0393602
119.8	0.161899	0.11338	0.0708168	0.03456	0.0162703		119.8	0.194175	0.15468	0.0939377	0.058147	0.0390164
120	0.161958	0.11334	0.0704096	0.0339691	0.0157544		120	0.193934	0.154686	0.0936735	0.0574149	0.0383326
120.2	0.161856	0.113346	0.0709358	0.034008	0.0154062		120.2	0.193615	0.154221	0.0937022	0.0572729	0.038263
120.4	0.162025	0.113245	0.0704306	0.0342433	0.015146		120.4	0.193588	0.154128	0.093936	0.0570173	0.0387708
120.6	0.162155	0.112708	0.0704994	0.0344276	0.0148826		120.6	0.193733	0.154306	0.0940886	0.0570515	0.0393691
120.8	0.162445	0.112751	0.0704003	0.0348902	0.0148412		120.8	0.193708	0.154011	0.0939143	0.0565275	0.0396299
121	0.162852	0.113285	0.0709176	0.0348474	0.0153463		121	0.193816	0.154446	0.0945417	0.0570509	0.0402277
121.2	0.163301	0.11327	0.070482	0.0344663	0.0151559		121.2	0.193965	0.154273	0.0951123	0.0573534	0.0401563
121.4	0.16354	0.113562	0.070694	0.0346904	0.0151792		121.4	0.193859	0.154164	0.0956755	0.0576041	0.0404869
121.6	0.164364	0.114367	0.0712992	0.0351308	0.0155947		121.6	0.195147	0.154815	0.0962256	0.0581837	0.0406843
121.8	0.164497	0.114698	0.0710488	0.0354435	0.0151108		121.8	0.195292	0.154393	0.0960424	0.0579758	0.040303
122	0.164928	0.115188	0.0713146	0.0354178	0.0153525		122	0.195449	0.154857	0.0964928	0.0582532	0.0401744
122.2	0.165128	0.115463	0.0709923	0.0353315	0.0154143		122.2	0.196247	0.155553	0.0968719	0.0586443	0.0403953
122.4	0.165368	0.115611	0.0709102	0.0349432	0.0152016		122.4	0.19684	0.155974	0.0969036	0.0590506	0.040209
122.6	0.164894	0.115686	0.0703537	0.0345574	0.0149858		122.6	0.196598	0.155926	0.0968838	0.0590763	0.0397925
122.8	0.164869	0.115493	0.0699296	0.0346128	0.0147619		122.8	0.197328	0.156687	0.0970294	0.0596887	0.0395389
123	0.165176	0.115929	0.0703253	0.0347754	0.0151038		123	0.196652	0.156123	0.096636	0.0596858	0.0390506
123.2	0.164774	0.115742	0.0700723	0.0345397	0.0143228		123.2	0.196691	0.155473	0.0962515	0.0594621	0.0384088
123.4	0.165141	0.115849	0.0704189	0.0349913	0.0144917		123.4	0.19682	0.155821	0.0963194	0.0597951	0.038315
123.6	0.165222	0.115713	0.0705677	0.0347543	0.0142289		123.6	0.196967	0.155638	0.0961195	0.0595529	0.0382901
123.8	0.165663	0.115898	0.0708434	0.0349983	0.0139575		123.8	0.196988	0.155332	0.0958678	0.058885	0.0376639
124	0.165983	0.11583	0.0708934	0.0350967	0.0138723		124	0.196853	0.155214	0.0958225	0.0585815	0.0377764
124.2	0.166345	0.115642	0.0710144	0.0353801	0.0140759		124.2	0.196651	0.154842	0.0957279	0.0584003	0.0378823
124.4	0.166121	0.115555	0.0709981	0.0352157	0.0143516		124.4	0.196718	0.155071	0.096301	0.0584798	0.03861
124.6	0.165941	0.115407	0.0710093	0.0359277	0.0144885		124.6	0.197151	0.154753	0.0958962	0.0585887	0.0389773
124.8	0.16637	0.11577	0.0712783	0.036353	0.0147075		124.8	0.19752	0.154875	0.0958987	0.0586964	0.0395886
125	0.166168	0.115524	0.0714132	0.036089	0.0144478		125	0.197626	0.15516	0.0964427	0.0592364	0.0400288
125.2	0.165971	0.114974	0.0711727	0.0359722	0.0142518		125.2	0.197878	0.155192	0.0964061	0.0590672	0.0403941
125.4	0.16626	0.115429	0.0714349	0.0363792	0.0147705		125.4	0.197909	0.155013	0.0965219	0.0590858	0.0407455
125.6	0.166581	0.115775	0.0714184	0.0368284	0.0147052		125.6	0.198419	0.155621	0.0964598	0.0585771	0.0407406
125.8	0.166104	0.11617	0.071161	0.0368237	0.0146191		125.8	0.198185	0.155697	0.0963007	0.0587528	0.0408972
126	0.166534	0.116731	0.0711169	0.0363091	0.0150783		126	0.198595	0.156769	0.0970695	0.0588043	0.0414006
126.2	0.166413	0.116809	0.0705171	0.0360621	0.0149126		126.2	0.199413	0.157118	0.0970196	0.0589322	0.0418158
126.4	0.166345	0.116651	0.070459	0.0362536	0.0153711		126.4	0.1997	0.157747	0.0971066	0.0595406	0.0421479
126.6	0.16626	0.116912	0.0702869	0.0363333	0.0156573		126.6	0.199938	0.158226	0.0969774	0.0603152	0.0422009
126.8	0.166121	0.117151	0.0703992	0.0367912	0.0157943		126.8	0.19961	0.158367	0.0972725	0.0603506	0.0419514
127	0.166163	0.117151	0.0710109	0.0367711	0.015796		127	0.199457	0.158385	0.097266	0.060311	0.0418032
127.2	0.166149	0.117429	0.0713136	0.03697	0.0155064		127.2	0.200144	0.158695	0.0978121	0.0607136	0.0419391
127.4	0.166522	0.117421	0.0712205	0.0367626	0.0157567		127.4	0.200218	0.158856	0.0982449	0.0609318	0.0421017
127.6	0.166715	0.11723	0.0710262	0.0364475	0.0157625		127.6	0.199978	0.158683	0.0982513	0.0608457	0.0421109
127.8	0.167215	0.11722	0.0713771	0.0366391	0.0161422		127.8	0.199499	0.158426	0.0986461	0.0609165	0.0416177
128	0.167351	0.116928	0.0715233	0.0365333	0.0161622		128	0.199771	0.157959	0.0988218	0.0610886	0.0414259
128.2	0.167863	0.117421	0.0721416	0.0366876	0.0163513		128.2	0.199603	0.157658	0.0986675	0.0607231	0.0409439
128.4	0.16823	0.118081	0.0730438	0.0370245	0.0166663		128.4	0.199873	0.157651	0.0991208	0.0607149	0.0412798
128.6	0.168491	0.117475	0.0730055	0.0369862	0.0162772		128.6	0.200744	0.15804	0.0987505	0.0612213	0.0414322
128.8	0.168733	0.117681	0.0733977	0.0367867	0.0159102		128.8	0.200831	0.157895	0.0986777	0.0612545	0.0412817
129	0.169196	0.11731	0.0734583	0.036945	0.0160167		129	0.200719	0.15733	0.0982507	0.0609191	0.0407272
129.2	0.169483	0.117659	0.0733105	0.0365754	0.0162149		129.2	0.200803	0.157116	0.0974879	0.0603149	0.040505
129.4	0.169456	0.117751	0.0731676	0.036465	0.0159712		129.4	0.200912	0.156777	0.0972855	0.0600399	0.0400908
129.6	0.169286	0.117731	0.0736092	0.0363915	0.0159318		129.6	0.201353	0.157144	0.0970547	0.0598708	0.0398193
129.8	0.169409	0.117583	0.0732967	0.0362714	0.0162923		129.8	0.201878	0.157632	0.0975475	0.0602276	0.0402552
130	0.170205	0.117919	0.0738263	0.0366305	0.0166535		130	0.202862	0.158339	0.0976922	0.0602629	0.0407507
130.2	0.170326	0.11769	0.0734583	0.0367172	0.0164861		130.2	0.203353	0.158545	0.0974993	0.0609674	0.0410602
130.4	0.170567	0.117781	0.0735023	0.0369776	0.0161932		130.4	0.203299	0.158966	0.0971504	0.061504	0.0411141
130.6	0.170454	0.118102	0.0735633	0.0371462	0.0158376		130.6	0.203012	0.158747	0.0970124	0.0616562	0.0414081
130.8	0.170306	0.118494	0.0735975	0.0374085	0.0156656		130.8	0.202759	0.158334	0.0970579	0.0613484	0.0413009
131	0.170647	0.119102	0.0739866	0.0375005	0.0159991		131	0.202768	0.158126	0.0969081	0.0616152	0.0412158
131.2	0.170459	0.119387	0.0734802	0.0372413	0.0156801		131.2	0.202105	0.157515	0.0966474	0.0610741	0.0408336
131.4	0.170058	0.119291	0.0727576	0.0367993	0.0154091		131.4	0.201751	0.157609	0.0972145	0.0612193	0.0407558
131.6	0.169855	0.11928	0.0729506	0.0372209	0.0154442		131.6	0.201724	0.157617	0.0973418	0.0611118	0.0407079
131.8	0.169969	0.11968	0.0730427	0.0374338	0.0154971		131.8	0.201293	0.15775	0.097906	0.0609751	0.0407283
132	0.170218	0.120224	0.0733185	0.0375316	0.0150522		132	0.201521	0.158147	0.0985316	0.0613507	0.040991
132.2	0.170939	0.120898	0.0740938	0.0379811	0.0152899		132.2	0.20152	0.15857	0.0985497	0.0611632	0.041475
132.4	0.171301	0.121047	0.0741324	0.0382251	0.0152514		132.4	0.202506	0.159594	0.0997629	0.061552	0.0422607
132.6	0.17116	0.120704	0.0737033	0.0375625	0.0149231		132.6	0.202781	0.159881	0.0997938	0.0619294	0.0422771
132.8	0.171484	0.120914	0.0738811	0.0379953	0.0148033		132.8	0.202826	0.159416	0.0998201	0.0614911	0.0418304
133	0.172127	0.121419	0.0741001	0.0387172	0.0156431		133	0.202849	0.159253	0.0996511	0.060997	0.0415965
133.2	0.171911	0.121507	0.0741465	0.0391776	0.0159601		133.2	0.203106	0.159197	0.0993256	0.0607599	0.0417026
133.4	0.171689	0.120833	0.0741238	0.03927	0.0156781		133.4	0.203127	0.159068	0.0996427	0.0608384	0.0411435
133.6	0.171819	0.120671	0.0746265	0.0393413	0.0161674		133.6	0.203381	0.159357	0.0998003	0.0611654	0.0412608
133.8	0.172415	0.120777	0.0746044	0.0398952	0.0161839		133.8	0.203534	0.159516	0.0997563	0.0608588	0.0414322
134	0.172979	0.121132	0.0754681	0.0403982	0.0163296		134	0.203896	0.160101	0.0994609	0.0610101	0.0414467
134.2	0.172211	0.120741	0.0749241	0.0400287	0.0160927		134.2	0.203942	0.160352	0.0996223	0.0617706	0.0416719
134.4	0.172168	0.12071	0.0752971	0.0399844	0.0160671		134.4	0.203922	0.160096	0.0990679	0.0616949	0.0414459
134.6	0.172102	0.120915	0.0750636	0.0399769	0.016003		134.6	0.204326	0.160077	0.0994974	0.0620878	0.0418113
134.8	0.172651	0.121439	0.0752527	0.0394771	0.0164485		134.8	0.204299	0.159675	0.0992948	0.0621416	0.041472
135	0.172676	0.121223	0.0752396	0.0386973	0.0166247		135	0.204057	0.159458	0.0990271	0.061713	0.0408639
135.2	0.171995	0.120194	0.0744993	0.0376577	0.0157443		135.2	0.204139	0.159387	0.0984115	0.0613429	0.040586
135.4	0.172692	0.120483	0.0745154	0.0376809	0.0158325		135.4	0.204512	0.159852	0.0988598	0.061802	0.0407044
135.6	0.173209	0.120991	0.0749361	0.0376958	0.0162878		135.6	0.204835	0.160295	0.0991827	0.0619188	0.0408768
135.8	0.173461	0.121341	0.0748572	0.0372084	0.0162422		135.8	0.204816	0.160552	0.0995312	0.0623448	0.041272
136	0.173877	0.121493	0.0749737	0.0369915	0.0159651		136	0.204972	0.160683	0.0998716	0.0627438	0.0413138
136.2	0.174292	0.121584	0.0751665	0.0368722	0.0161002		136.2	0.205239	0.160887	0.0995603	0.0627047	0.0414641
136.4	0.174099	0.121352	0.0748608	0.03647	0.015954		136.4	0.20542	0.161405	0.0999144	0.0627588	0.0413086
136.6	0.173605	0.121191	0.0746952	0.0356861	0.0155367		136.6	0.204751	0.161234	0.0995758	0.0629815	0.0408686
136.8	0.173619	0.121086	0.0748426	0.0359845	0.0159365		136.8	0.204842	0.16162	0.100048	0.0631009	0.0408868
137	0.174165	0.122035	0.0754482	0.0368634	0.0166524		137	0.204539	0.16119	0.0995223	0.0627764	0.0409378
137.2	0.174242	0.122687	0.0757564	0.0372075	0.016678		137.2	0.204654	0.161074	0.0995822	0.0627973	0.0410527
137.4	0.17411	0.122794	0.0760385	0.0367103	0.0166162		137.4	0.204425	0.16129	0.100054	0.0630121	0.0408703
137.6	0.174603	0.123291	0.0769052	0.0372191	0.0174729		137.6	0.204746	0.161718	0.100026	0.0631918	0.0411409
137.8	0.174737	0.123787	0.0769669	0.0377539	0.0174341		137.8	0.20532	0.161787	0.0999998	0.063198	0.0413348
138	0.174548	0.123382	0.0767485	0.0376431	0.0174929		138	0.205969	0.162422	0.10015	0.0632073	0.041857
138.2	0.174198	0.123036	0.0763508	0.0370641	0.017501		138.2	0.206216	0.162663	0.100047	0.0631526	0.0424198
138.4	0.174786	0.123298	0.0766005	0.0373222	0.0174383		138.4	0.20633	0.162722	0.0996595	0.0627863	0.0426824
138.6	0.175144	0.123417	0.0761246	0.0375151	0.0171537		138.6	0.206449	0.162443	0.0995237	0.0626804	0.0427288
138.8	0.175293	0.123693	0.0761748	0.0373137	0.0174147		138.8	0.206396	0.161954	0.0988741	0.0619889	0.0430611
139	0.175704	0.123094	0.0761317	0.0376272	0.0170104		139	0.206666	0.161666	0.0985699	0.0613839	0.0427723
139.2	0.175976	0.123124	0.0757181	0.0377279	0.0163334		139.2	0.206782	0.16114	0.0980698	0.0608107	0.042245
139.4	0.176533	0.123918	0.0761457	0.038524	0.0165921		139.4	0.207014	0.161012	0.0984398	0.0603838	0.0422357
139.6	0.176601	0.123883	0.0763916	0.0383916	0.0170247		139.6	0.207079	0.160495	0.097959	0.0602565	0.0418292
139.8	0.176743	0.123597	0.0762546	0.0383818	0.0166231		139.8	0.207193	0.160387	0.0980466	0.0603665	0.0422672
140	0.176663	0.123758	0.0763038	0.0385634	0.0163945		140	0.206876	0.160026	0.0983415	0.0604759	0.0420712
140.2	0.176514	0.124104	0.0764442	0.0386897	0.0166182		140.2	0.206853	0.160113	0.0984068	0.0608478	0.0421512
140.4	0.176062	0.123821	0.0757431	0.0385534	0.0165843		140.4	0.207049	0.160443	0.098622	0.0614528	0.0418978
140.6	0.175878	0.123937	0.0754739	0.0382381	0.0161465		140.6	0.207128	0.160681	0.0993499	0.0621552	0.0418725
140.8	0.176149	0.124363	0.0756547	0.0385507	0.0166668		140.8	0.20745	0.1604	0.0998407	0.0621118	0.0417113
141	0.176645	0.125217	0.0760242	0.0387969	0.0171379		141	0.207146	0.159842	0.0998018	0.0621116	0.0414536
141.2	0.176865	0.125606	0.0761387	0.0388566	0.0173638		141.2	0.207345	0.15993	0.100637	0.0625937	0.0417067
141.4	0.177328	0.12595	0.0768252	0.0395151	0.0183646		141.4	0.207594	0.1608	0.101213	0.06331	0.0419682
141.6	0.177968	0.12564	0.0772806	0.0403228	0.0189403		141.6	0.207916	0.161349	0.101543	0.0639372	0.0422338
141.8	0.17757	0.125323	0.0765022	0.0397715	0.0186162		141.8	0.208318	0.161832	0.102089	0.0640155	0.0427479
142	0.17744	0.124815	0.0761838	0.0393204	0.0183918		142	0.208254	0.162806	0.1021	0.0641072	0.043211
142.2	0.177225	0.125186	0.0762993	0.0391009	0.0186826		142.2	0.208246	0.16397	0.102236	0.0645383	0.0433568
142.4	0.177049	0.125319	0.0765663	0.0391838	0.0185766		142.4	0.20822	0.16426	0.101941	0.0643916	0.0434327
142.6	0.176915	0.125127	0.0759816	0.0386883	0.0179565		142.6	0.208503	0.164369	0.101829	0.0644468	0.0437478
142.8	0.176924	0.124887	0.0760429	0.0389371	0.0178507		142.8	0.209128	0.165182	0.102086	0.0644767	0.0440672
143	0.176619	0.123879	0.0753798	0.0383562	0.0169472		143	0.208877	0.165187	0.101842	0.0638622	0.0430745
143.2	0.17681	0.123631	0.0748416	0.0379279	0.016594		143.2	0.209571	0.165395	0.101644	0.0638344	0.0430648
143.4	0.177211	0.123863	0.0755	0.0381494	0.0172486		143.4	0.209846	0.16612	0.101607	0.0642305	0.0434282
143.6	0.177861	0.12417	0.0756906	0.0379581	0.0172881		143.6	0.210248	0.166434	0.101722	0.0649566	0.0438606
143.8	0.177679	0.124197	0.0756955	0.0376885	0.0167031		143.8	0.211046	0.167192	0.10252	0.0655658	0.04473
144	0.177328	0.124586	0.0761025	0.0378442	0.0164652		144	0.211771	0.167574	0.102475	0.0660461	0.0447493
144.2	0.17746	0.124687	0.0760237	0.0373941	0.0160949		144.2	0.212303	0.167729	0.102463	0.0660937	0.0445263
144.4	0.177067	0.124083	0.0751056	0.0368799	0.0152882		144.4	0.212884	0.167852	0.102703	0.0665487	0.04455
144.6	0.177316	0.124543	0.0755233	0.0365589	0.0149345		144.6	0.212795	0.167125	0.103114	0.0663266	0.0442782
144.8	0.177667	0.124591	0.07594	0.0369075	0.0152722		144.8	0.21247	0.16596	0.103056	0.0658539	0.0437895
145	0.178031	0.124754	0.0762383	0.0374213	0.0155538		145	0.211982	0.165507	0.102853	0.0657306	0.0435779
145.2	0.178498	0.124826	0.0765331	0.0379165	0.0155382		145.2	0.211601	0.165264	0.1026	0.0654405	0.0434208
145.4	0.178478	0.124917	0.0768682	0.0386656	0.0160994		145.4	0.211539	0.165532	0.102879	0.0656193	0.0437957
145.6	0.178323	0.124458	0.0769346	0.0385879	0.0161837		145.6	0.211622	0.165358	0.103346	0.0660388	0.0439298
145.8	0.177571	0.123947	0.0768001	0.0383303	0.0157713		145.8	0.211625	0.165221	0.103554	0.065965	0.0436098
146	0.177907	0.12445	0.0773273	0.0385354	0.0159405		146	0.211381	0.165505	0.103485	0.0660962	0.0436972
146.2	0.177815	0.125035	0.0776427	0.0387762	0.0164405		146.2	0.211182	0.165725	0.10372	0.0662851	0.0437565
146.4	0.17802	0.124486	0.0774965	0.0386655	0.0160175		146.4	0.210944	0.165353	0.103437	0.0655806	0.0436085
146.6	0.178132	0.124614	0.0770731	0.0389169	0.016086		146.6	0.211108	0.165505	0.103449	0.0658432	0.0438522
146.8	0.177859	0.124483	0.0766796	0.0390348	0.016167		146.8	0.210808	0.165009	0.10353	0.0654385	0.0431068
147	0.178178	0.124606	0.0763582	0.0388527	0.0161375		147	0.210646	0.165227	0.103126	0.0650896	0.0425527
147.2	0.17913	0.125228	0.0768802	0.0391346	0.0170614		147.2	0.211317	0.165844	0.103257	0.0653506	0.0430015
147.4	0.17916	0.126129	0.0774847	0.0390196	0.0176174		147.4	0.211724	0.166912	0.103432	0.0658972	0.0432671
147.6	0.17875	0.126188	0.0776464	0.0386343	0.017463		147.6	0.21223	0.167392	0.103821	0.0658921	0.0436379
147.8	0.178757	0.126157	0.0776943	0.0382301	0.0172158		147.8	0.21289	0.168214	0.104249	0.0660541	0.0437464
148	0.178902	0.126325	0.0777795	0.0384248	0.0169606		148	0.213175	0.168683	0.104111	0.0656517	0.0435248
148.2	0.1793	0.126362	0.077536	0.0383949	0.0166151		148.2	0.213106	0.168835	0.104035	0.0654702	0.0435138
148.4	0.1795	0.126985	0.0776011	0.0387554	0.0168081		148.4	0.213359	0.169185	0.10442	0.0658027	0.0437819
148.6	0.180301	0.127582	0.0781863	0.0392353	0.0171092		148.6	0.213403	0.16918	0.104152	0.065341	0.0438559
148.8	0.181209	0.128152	0.0782806	0.0400739	0.017622		148.8	0.212813	0.169274	0.103828	0.0646575	0.0436672
149	0.181543	0.128865	0.0783876	0.040475	0.0176114		149	0.212308	0.168986	0.103339	0.0639187	0.0434503
149.2	0.181955	0.129229	0.0788202	0.0410435	0.0180614		149.2	0.212593	0.168976	0.103502	0.0638026	0.043969
149.4	0.181425	0.129053	0.0783933	0.0411736	0.0181437		149.4	0.213115	0.169111	0.103889	0.0643506	0.0449935
149.6	0.181793	0.129025	0.0787241	0.0414112	0.0182653		149.6	0.21372	0.169294	0.104516	0.0646124	0.0453266
149.8	0.182024	0.128865	0.0790319	0.0415919	0.018195		149.8	0.213992	0.169172	0.104602	0.0641961	0.0454822
150	0.183173	0.129823	0.0796683	0.0424487	0.0191737		150	0.213671	0.168861	0.104736	0.0639135	0.0458162
150.2	0.183537	0.130149	0.0798201	0.0429663	0.0194167		150.2	0.213767	0.168438	0.10458	0.0643001	0.0457554
150.4	0.183105	0.129466	0.0793006	0.0429495	0.0190804		150.4	0.213597	0.168212	0.104549	0.0640588	0.0457076
150.6	0.183011	0.129423	0.0792751	0.042927	0.0194044		150.6	0.213453	0.167758	0.104628	0.0643266	0.0455162
150.8	0.182748	0.129122	0.0790634	0.042443	0.0191279		150.8	0.213102	0.167316	0.104706	0.0644368	0.0450686
151	0.183326	0.128956	0.0794159	0.0424976	0.0195084		151	0.213716	0.167934	0.105037	0.0648915	0.0451236
151.2	0.182913	0.128861	0.0795393	0.0419307	0.0196526		151.2	0.213522	0.167941	0.105123	0.0650168	0.0447279
151.4	0.182358	0.128354	0.0793715	0.041391	0.0192377		151.4	0.214051	0.168583	0.105667	0.0657007	0.0447328
151.6	0.18219	0.127679	0.0793692	0.0409943	0.0189294		151.6	0.213486	0.168557	0.105786	0.0656824	0.0444394
151.8	0.182392	0.128115	0.078964	0.0407351	0.0187829		151.8	0.213747	0.169066	0.105823	0.0663667	0.044226
152	0.182402	0.128131	0.0791359	0.0407053	0.0187575		152	0.213529	0.169087	0.105434	0.0665712	0.0437167
152.2	0.182447	0.128265	0.0792217	0.0404546	0.0185734		152.2	0.213169	0.168901	0.104782	0.0670525	0.0434576
152.4	0.182749	0.129038	0.0796546	0.0404783	0.0188705		152.4	0.213246	0.168988	0.104686	0.0670215	0.0434812
152.6	0.183279	0.128734	0.0797775	0.0406448	0.0185405		152.6	0.212943	0.168633	0.104425	0.0666546	0.0433722
152.8	0.183146	0.129023	0.0798645	0.0408982	0.0183892		152.8	0.21279	0.168459	0.10415	0.0663835	0.0431477
153	0.183152	0.129791	0.0802147	0.0413248	0.0189425		153	0.213188	0.168502	0.104436	0.0666006	0.0434499
153.2	0.182877	0.129304	0.0802782	0.0415832	0.0192413		153.2	0.21386	0.168881	0.104298	0.0669083	0.0442026
153.4	0.182953	0.129239	0.0801207	0.0414077	0.0188577		153.4	0.214117	0.169223	0.104163	0.0672788	0.0445748
153.6	0.183233	0.129276	0.0807593	0.0418342	0.0190374		153.6	0.215048	0.169448	0.104592	0.0671694	0.0446052
153.8	0.18325	0.129554	0.0807337	0.0416183	0.0187107		153.8	0.215248	0.169264	0.104314	0.0670604	0.0448324
154	0.18384	0.129739	0.0810517	0.0420114	0.01881		154	0.215502	0.168959	0.104502	0.067088	0.0449434
154.2	0.183901	0.130044	0.0808358	0.0420478	0.0188005		154.2	0.215719	0.169072	0.104744	0.0673578	0.0453783
154.4	0.183572	0.13003	0.0804846	0.0421263	0.0187919		154.4	0.215337	0.168617	0.10474	0.0662351	0.045206
154.6	0.184538	0.13017	0.0806548	0.0419495	0.019033		154.6	0.215809	0.16854	0.105287	0.0659588	0.0456551
154.8	0.184747	0.130222	0.0807331	0.0421069	0.0188558		154.8	0.216118	0.168918	0.105449	0.0658496	0.0458086
155	0.185426	0.130365	0.0812023	0.0425533	0.0191565		155	0.216536	0.169993	0.105847	0.0659226	0.0461617
155.2	0.185566	0.130381	0.0813011	0.0424644	0.0188266		155.2	0.215891	0.170299	0.105947	0.0655935	0.0458612
155.4	0.185737	0.130278	0.0806826	0.0420886	0.0185552		155.4	0.21629	0.170513	0.106338	0.0657748	0.0462893
155.6	0.186168	0.130485	0.080937	0.0418657	0.018423		155.6	0.215733	0.170553	0.106172	0.0654996	0.0461124
155.8	0.186729	0.131787	0.0810099	0.0420333	0.0188375		155.8	0.216042	0.170482	0.10627	0.0655297	0.0459388
156	0.18721	0.131702	0.0813454	0.0419229	0.0187612		156	0.215434	0.170094	0.105934	0.0653104	0.0457694
156.2	0.187451	0.1317	0.0815801	0.0418707	0.0186807		156.2	0.215415	0.169578	0.105501	0.0649444	0.0454118
156.4	0.188024	0.1319	0.0817746	0.0423897	0.0187897		156.4	0.215959	0.16984	0.105702	0.0648955	0.0455447
156.6	0.188642	0.131867	0.0820746	0.0428202	0.0187408		156.6	0.216285	0.169945	0.105974	0.0650585	0.045614
156.8	0.188099	0.131903	0.0822246	0.0429071	0.0188939		156.8	0.215882	0.170269	0.105729	0.0649061	0.0452588
157	0.188605	0.132463	0.0825206	0.0431045	0.0193632		157	0.215714	0.170685	0.105854	0.0650906	0.0451984
157.2	0.188248	0.132193	0.0823159	0.0429199	0.0190368		157.2	0.21555	0.171299	0.10569	0.0656181	0.0451995
157.4	0.188009	0.132121	0.0823818	0.0427001	0.0189418		157.4	0.215801	0.171437	0.105818	0.0660768	0.0451468
157.6	0.187941	0.131984	0.0824536	0.0428351	0.019144		157.6	0.216729	0.172075	0.106174	0.0667071	0.0453149
157.8	0.187523	0.132062	0.0817877	0.0422128	0.0189487		157.8	0.216994	0.17239	0.106333	0.0670565	0.0458259
158	0.187725	0.132064	0.0820986	0.0423061	0.0194107		158	0.217206	0.17232	0.106299	0.0669779	0.0456714
158.2	0.187645	0.132104	0.0818873	0.0423492	0.0199139		158.2	0.216751	0.17235	0.106158	0.0665859	0.0457625
158.4	0.187472	0.131775	0.0814231	0.0421403	0.0199897		158.4	0.216439	0.172284	0.105983	0.0656864	0.0454388
158.6	0.187326	0.131321	0.0810535	0.0417586	0.0197961		158.6	0.216764	0.17243	0.106544	0.0663385	0.046263
158.8	0.187217	0.131103	0.0809168	0.0421138	0.0195592		158.8	0.216473	0.172879	0.106255	0.0666587	0.0459738
159	0.187712	0.13146	0.0812633	0.0425297	0.0200851		159	0.216394	0.173475	0.106621	0.0670101	0.0463159
159.2	0.187758	0.131735	0.0809599	0.0425861	0.0198142		159.2	0.216373	0.172779	0.106576	0.0666691	0.0463485
159.4	0.187863	0.131713	0.0807211	0.0425425	0.0198667		159.4	0.216905	0.172523	0.106672	0.066762	0.0469741
159.6	0.188265	0.132606	0.0812797	0.0428047	0.0201306		159.6	0.216952	0.17236	0.106489	0.0662984	0.0467415
159.8	0.188837	0.133127	0.0813303	0.0427032	0.020073		159.8	0.217333	0.172199	0.106615	0.0667023	0.0464675
160	0.188763	0.132637	0.0811716	0.0427797	0.0194449		160	0.217187	0.172106	0.106218	0.0666968	0.046454
160.2	0.18854	0.132547	0.0814604	0.0429102	0.0191014		160.2	0.217171	0.171406	0.105784	0.0660644	0.045981
160.4	0.188337	0.132547	0.0810534	0.0428276	0.0184941		160.4	0.216931	0.171579	0.105718	0.0659771	0.0460891
160.6	0.188543	0.132576	0.0819188	0.0433198	0.018485		160.6	0.216185	0.171325	0.105257	0.0655887	0.0461113
160.8	0.188325	0.132401	0.0819092	0.0433369	0.0182648		160.8	0.215687	0.171668	0.10523	0.06516	0.0457827
161	0.188144	0.132528	0.08198	0.0431	0.0180814		161	0.216086	0.171739	0.105331	0.0656832	0.0459017
161.2	0.188181	0.132899	0.0818523	0.0433491	0.0181982		161.2	0.215839	0.172152	0.105346	0.0658558	0.0458549
161.4	0.188418	0.133044	0.082205	0.0435943	0.0186398		161.4	0.216211	0.172055	0.105585	0.065669	0.0457705
161.6	0.188707	0.13344	0.0825611	0.0439685	0.0189211		161.6	0.216936	0.17245	0.106134	0.0662648	0.0462791
161.8	0.188384	0.133447	0.0820131	0.0439429	0.0191293		161.8	0.217098	0.172562	0.106478	0.0664388	0.0463431
162	0.188775	0.133491	0.0820486	0.0438654	0.0193784		162	0.217297	0.172291	0.1064	0.0662893	0.0458462
162.2	0.189357	0.134035	0.0820943	0.0438451	0.0195885		162.2	0.217838	0.172236	0.106971	0.0663869	0.0460549
162.4	0.190029	0.134009	0.0814594	0.0435756	0.0196517		162.4	0.218288	0.172072	0.107404	0.0667282	0.0460843
162.6	0.190488	0.134392	0.0819556	0.0436161	0.019971		162.6	0.218715	0.171558	0.10738	0.0672627	0.04616
162.8	0.190681	0.134326	0.0821718	0.0438341	0.020072		162.8	0.219343	0.172203	0.107521	0.0672312	0.0464925
163	0.191375	0.135182	0.082514	0.0440319	0.0205426		163	0.219735	0.172194	0.108013	0.0674197	0.0470894
163.2	0.191471	0.135076	0.0823241	0.043556	0.0201654		163.2	0.22007	0.171477	0.107934	0.0674452	0.0470529
163.4	0.191447	0.13542	0.0825921	0.0433005	0.0202147		163.4	0.220801	0.171809	0.108444	0.0678105	0.0477097
163.6	0.191154	0.136011	0.0822807	0.0430108	0.0197031		163.6	0.221284	0.172028	0.10873	0.067871	0.047398
163.8	0.190828	0.135062	0.0823548	0.0426227	0.0190184		163.8	0.221887	0.172672	0.109051	0.0685235	0.0479038
164	0.191052	0.135097	0.0829331	0.0434812	0.0190693		164	0.222109	0.17281	0.108719	0.068544	0.0482118
164.2	0.190825	0.134357	0.0832112	0.0432845	0.0188009		164.2	0.221962	0.173326	0.108916	0.0684212	0.0482232
164.4	0.190509	0.133942	0.0830208	0.0429032	0.0184617		164.4	0.221848	0.174063	0.109311	0.0683866	0.0480763
164.6	0.190807	0.133767	0.0840827	0.0434038	0.0188727		164.6	0.221974	0.174381	0.109184	0.0681036	0.0481471
164.8	0.190944	0.133571	0.0836454	0.0430302	0.0189617		164.8	0.22308	0.175751	0.110133	0.068632	0.0487752
165	0.191075	0.134157	0.0842263	0.0431871	0.0196586		165	0.223329	0.175827	0.110188	0.0690419	0.0487419
165.2	0.19124	0.134734	0.0846451	0.0437818	0.0201032		165.2	0.223493	0.176643	0.110663	0.0689697	0.0488363
165.4	0.191312	0.135491	0.0851986	0.0445689	0.0210277		165.4	0.223778	0.177167	0.111318	0.0691945	0.0485266
165.6	0.191468	0.13522	0.085666	0.0449355	0.0216484		165.6	0.224154	0.177504	0.111533	0.0697842	0.0489538
165.8	0.191671	0.135484	0.0858928	0.0453186	0.0222213		165.8	0.224382	0.178182	0.111737	0.070216	0.0489458
166	0.192126	0.135964	0.0861756	0.0451187	0.022698		166	0.224415	0.178182	0.111596	0.0701799	0.0488061
166.2	0.192783	0.136361	0.0867573	0.0455944	0.0232238		166.2	0.224549	0.177753	0.111334	0.0701126	0.0490913
166.4	0.193061	0.136357	0.0865183	0.0448473	0.0234035		166.4	0.223999	0.17788	0.111041	0.0703295	0.0489582
166.6	0.192728	0.136749	0.0868577	0.0443857	0.023288		166.6	0.223664	0.177432	0.110574	0.0702426	0.0491018
166.8	0.192521	0.136617	0.0858486	0.0439329	0.0227481		166.8	0.223284	0.177489	0.110613	0.0701499	0.0490665
167	0.193407	0.137781	0.0861734	0.0440443	0.0229688		167	0.222769	0.176942	0.110539	0.0702872	0.0491446
167.2	0.19234	0.137629	0.0858471	0.0436458	0.0223862		167.2	0.222168	0.175695	0.110052	0.0697958	0.0485955
167.4	0.191989	0.137921	0.0850576	0.043665	0.0216551		167.4	0.222436	0.176278	0.110493	0.0700022	0.0491847
167.6	0.191502	0.137592	0.0845367	0.0433974	0.0209433		167.6	0.222351	0.176142	0.110206	0.0696813	0.0488778
167.8	0.192251	0.137297	0.0848937	0.0437705	0.0205991		167.8	0.222214	0.176048	0.110068	0.0699005	0.0488143
168	0.193224	0.13772	0.0850218	0.0443391	0.0205621		168	0.222262	0.176048	0.110099	0.0698051	0.0485716
168.2	0.193624	0.137777	0.0848948	0.0442381	0.0202688		168.2	0.222622	0.176275	0.110385	0.0697555	0.0484296
168.4	0.19375	0.138077	0.0846102	0.0440458	0.0202551		168.4	0.222912	0.176173	0.110346	0.0696157	0.0482556
168.6	0.19376	0.138207	0.0847016	0.0443671	0.0202072		168.6	0.223271	0.176223	0.110124	0.0699479	0.0484866
168.8	0.194105	0.138092	0.0848208	0.0446783	0.0202117		168.8	0.223822	0.176532	0.110371	0.0703671	0.0485278
169	0.194738	0.138927	0.0857866	0.0454643	0.020792		169	0.223785	0.176187	0.110222	0.0703321	0.04835
169.2	0.194051	0.138262	0.0858699	0.0458198	0.0203588		169.2	0.224017	0.176627	0.110815	0.0706219	0.0486313
169.4	0.194048	0.138338	0.085938	0.0460138	0.020319		169.4	0.223786	0.176666	0.110903	0.0704083	0.0483652
169.6	0.194624	0.138342	0.0862851	0.0464754	0.0205439		169.6	0.223897	0.176819	0.110752	0.0709095	0.0488329
169.8	0.194575	0.138752	0.0864258	0.0469472	0.0208865		169.8	0.22399	0.176812	0.110673	0.070622	0.048635
170	0.195028	0.138731	0.0863729	0.0465796	0.0213055		170	0.223891	0.176814	0.110668	0.0705493	0.0485588
170.2	0.194681	0.137906	0.0858861	0.0462187	0.0209219		170.2	0.224152	0.176724	0.110742	0.0709176	0.0489849
170.4	0.195323	0.13806	0.085579	0.0454644	0.020968		170.4	0.22441	0.17773	0.111441	0.0715431	0.049322
170.6	0.195682	0.138157	0.0857836	0.0456124	0.0208349		170.6	0.224655	0.177328	0.111629	0.0718151	0.0495681
170.8	0.195835	0.138337	0.0855501	0.0461546	0.0210821		170.8	0.224706	0.177505	0.111744	0.0718836	0.0495039
171	0.196297	0.138681	0.086102	0.0465409	0.0213136		171	0.224846	0.177746	0.11161	0.0719611	0.0498074
171.2	0.195893	0.138325	0.0852889	0.0462188	0.0208671		171.2	0.22493	0.177482	0.111445	0.071406	0.0495849
171.4	0.196304	0.137974	0.0846949	0.0461671	0.0206292		171.4	0.225749	0.178972	0.112316	0.0721058	0.0501488
171.6	0.196733	0.138048	0.0851416	0.0462474	0.0209066		171.6	0.226095	0.17935	0.112025	0.0717874	0.0500367
171.8	0.197585	0.13815	0.0850364	0.0464097	0.0206031		171.8	0.226569	0.179459	0.111855	0.0714557	0.0501107
172	0.197763	0.138382	0.0850548	0.0460583	0.0206649		172	0.226975	0.179627	0.111767	0.0709289	0.0500266
172.2	0.198161	0.138821	0.0854707	0.0463668	0.0209809		172.2	0.227075	0.179402	0.111424	0.0705743	0.0497259
172.4	0.198139	0.138553	0.0854073	0.0462807	0.0209381		172.4	0.227024	0.179566	0.111454	0.0708134	0.050025
172.6	0.197907	0.138451	0.0861426	0.0464942	0.0207203		172.6	0.226521	0.179721	0.111129	0.0706624	0.0497623
172.8	0.198187	0.138711	0.0869459	0.0471156	0.0210185		172.8	0.226402	0.179817	0.110966	0.0704675	0.0494139
173	0.198402	0.138962	0.087175	0.0470287	0.0213271		173	0.22619	0.179897	0.110544	0.0700337	0.0492302
173.2	0.197528	0.139294	0.0873517	0.0473297	0.0212724		173.2	0.22598	0.179985	0.110462	0.0699454	0.0491764
173.4	0.197941	0.140211	0.0875272	0.0473337	0.021443		173.4	0.225853	0.179998	0.11019	0.0696197	0.0486711
173.6	0.198028	0.140525	0.0873047	0.0471216	0.0215807		173.6	0.226138	0.180066	0.1099	0.0700317	0.0490076
173.8	0.197629	0.140283	0.0869383	0.046506	0.0216859		173.8	0.22615	0.179905	0.110061	0.0698315	0.0487253
174	0.197651	0.139703	0.0863686	0.0453278	0.0215245		174	0.226595	0.180718	0.111033	0.0704996	0.0495464
174.2	0.19763	0.139809	0.086477	0.0453327	0.021632		174.2	0.226583	0.180733	0.111558	0.0710003	0.0498955
174.4	0.198313	0.140364	0.0866572	0.04576	0.0219146		174.4	0.226611	0.180837	0.112096	0.071057	0.0503749
174.6	0.198058	0.140321	0.0866507	0.0455513	0.0217498		174.6	0.226897	0.180627	0.112665	0.0714155	0.0506847
174.8	0.198464	0.140822	0.0866618	0.0457394	0.0225014		174.8	0.226785	0.18029	0.112559	0.0711488	0.0501219
175	0.198875	0.140391	0.0867864	0.0456489	0.0225802		175	0.226936	0.180435	0.112593	0.071223	0.0498637
175.2	0.198939	0.140546	0.0865692	0.0453896	0.0226017		175.2	0.22717	0.180481	0.113183	0.0714339	0.0500212
175.4	0.198621	0.140548	0.0867746	0.0457357	0.022394		175.4	0.227516	0.181058	0.113822	0.0719342	0.0504856
175.6	0.198725	0.140739	0.0870281	0.046065	0.0226089		175.6	0.227311	0.180804	0.113413	0.0713903	0.0501555
175.8	0.198706	0.140654	0.0867941	0.0457538	0.0221373		175.8	0.227243	0.180482	0.113035	0.0707712	0.0498793
176	0.198638	0.140429	0.0870913	0.0453915	0.0220982		176	0.227453	0.180477	0.11299	0.0711149	0.049324
176.2	0.198927	0.140514	0.0872499	0.0460089	0.0222097		176.2	0.227834	0.180265	0.113041	0.0718024	0.0494202
176.4	0.199038	0.140235	0.0874376	0.0460198	0.0220299		176.4	0.2279	0.18051	0.112805	0.071949	0.0494818
176.6	0.198642	0.140003	0.0872659	0.0464572	0.0216036		176.6	0.227684	0.180799	0.112269	0.0717996	0.0492331
176.8	0.198632	0.140063	0.0872969	0.046721	0.0213259		176.8	0.227774	0.180261	0.111582	0.0712595	0.0484597
177	0.198806	0.139827	0.0866963	0.0466726	0.0209052		177	0.227636	0.180306	0.111443	0.0710973	0.0485042
177.2	0.198406	0.140013	0.0866124	0.0470305	0.0206651		177.2	0.227261	0.180389	0.111415	0.0708968	0.0486255
177.4	0.198666	0.139834	0.0861632	0.0468724	0.0205469		177.4	0.227237	0.180301	0.111184	0.0703246	0.0483432
177.6	0.198186	0.139383	0.0851287	0.0458253	0.0196602		177.6	0.22759	0.18058	0.111301	0.0705448	0.0486119
177.8	0.197971	0.139143	0.0844777	0.0452764	0.019146		177.8	0.227442	0.180172	0.111329	0.0698287	0.048046
178	0.198809	0.139441	0.0846005	0.045317	0.0198974		178	0.227659	0.180672	0.111604	0.0695528	0.0483716
178.2	0.199009	0.139836	0.0845593	0.0454701	0.0197282		178.2	0.227511	0.180616	0.111863	0.0693873	0.048216
178.4	0.1989	0.139665	0.0843128	0.0453698	0.0196407		178.4	0.227664	0.180639	0.112192	0.0691078	0.0485222
178.6	0.198984	0.139471	0.0841081	0.0446624	0.0197235		178.6	0.227947	0.180493	0.112457	0.0691143	0.0484525
178.8	0.199515	0.14017	0.0847718	0.0451477	0.0206079		178.8	0.227696	0.179945	0.112586	0.068447	0.0481391
179	0.199687	0.140017	0.0853863	0.0455477	0.0210653		179	0.22789	0.180249	0.112995	0.0686955	0.0485416
179.2	0.199833	0.141125	0.0859813	0.046153	0.0214032		179.2	0.227605	0.180289	0.113213	0.0688167	0.0487632
179.4	0.199962	0.14162	0.0868088	0.0471945	0.021973		179.4	0.227808	0.180543	0.113284	0.0692067	0.0492812
179.6	0.200444	0.142014	0.0873784	0.047832	0.0226364		179.6	0.228143	0.180696	0.113224	0.0695872	0.0489854
179.8	0.200639	0.14232	0.087878	0.0480789	0.0231342		179.8	0.228835	0.18063	0.113483	0.0704246	0.049249
180	0.200402	0.142186	0.0878943	0.0480591	0.0229509		180	0.229592	0.180864	0.113743	0.0714928	0.0493951
180.2	0.200265	0.142139	0.0878569	0.0484097	0.0227948		180.2	0.229739	0.180686	0.113682	0.072023	0.0497397
180.4	0.200112	0.142126	0.0878056	0.0484876	0.0224472		180.4	0.229922	0.181112	0.113611	0.0720137	0.0500165
180.6	0.200329	0.142011	0.0875862	0.0487705	0.0220727		180.6	0.229701	0.181334	0.113297	0.0723026	0.0500468
180.8	0.20011	0.141565	0.0874959	0.0486044	0.0213668		180.8	0.229457	0.181295	0.113213	0.0722392	0.0496004
181	0.200353	0.141239	0.0871978	0.0487827	0.0210637		181	0.229496	0.182171	0.113712	0.0729446	0.0500277
181.2	0.200195	0.14113	0.0871411	0.0489125	0.020906		181.2	0.229222	0.182288	0.113385	0.0725216	0.0495216
181.4	0.199712	0.140954	0.0866364	0.0483796	0.0203089		181.4	0.229599	0.182318	0.112747	0.0722113	0.0490305
181.6	0.199393	0.140986	0.0862079	0.0480807	0.0196968		181.6	0.23009	0.182541	0.112704	0.0726204	0.0489313
181.8	0.199434	0.140837	0.0861769	0.0479825	0.0196523		181.8	0.23051	0.182758	0.112732	0.0720118	0.04896
182	0.200073	0.141094	0.0865059	0.0481144	0.0202742		182	0.231181	0.183583	0.112954	0.072361	0.0493034
182.2	0.199789	0.140464	0.0860905	0.0471042	0.0192214		182.2	0.231214	0.184252	0.113211	0.0721804	0.0495589
182.4	0.200231	0.140656	0.0868798	0.0473749	0.0199741		182.4	0.230978	0.183844	0.112888	0.0712583	0.0494042
182.6	0.200847	0.140748	0.0871538	0.0472974	0.0201391		182.6	0.23116	0.183924	0.1128	0.0710494	0.0497997
182.8	0.201574	0.141714	0.0882187	0.047888	0.0210593		182.8	0.231581	0.184633	0.113283	0.0707903	0.0500434
183	0.201911	0.141867	0.0887731	0.0481978	0.0216346		183	0.231892	0.185082	0.113491	0.0710279	0.0503691
183.2	0.202376	0.14268	0.0894995	0.048749	0.0221117		183.2	0.231743	0.185306	0.113824	0.0711829	0.0503698
183.4	0.203445	0.143024	0.0903356	0.0491199	0.0231066		183.4	0.232188	0.185653	0.114252	0.0715919	0.0503815
183.6	0.203727	0.14316	0.0910094	0.0497309	0.0238287		183.6	0.232681	0.185499	0.114659	0.0716898	0.0503959
183.8	0.20393	0.14334	0.091314	0.0494341	0.0243825		183.8	0.232224	0.185431	0.115058	0.0717978	0.0506401
184	0.203866	0.143758	0.0912665	0.0492508	0.0247536		184	0.232162	0.185703	0.114859	0.0718728	0.050351
184.2	0.203678	0.143841	0.0912107	0.0491249	0.0249268		184.2	0.232367	0.185549	0.114728	0.0718334	0.0504429
184.4	0.203956	0.144249	0.0910267	0.0488899	0.0249293		184.4	0.232611	0.185826	0.114961	0.071755	0.0503646
184.6	0.20403	0.143904	0.0908294	0.0483581	0.0247901		184.6	0.232039	0.18588	0.114487	0.0716615	0.0499351
184.8	0.203315	0.142902	0.0901829	0.0482565	0.0240905		184.8	0.232548	0.18567	0.114771	0.0720523	0.0497134
185	0.203447	0.142898	0.0898591	0.0481629	0.0242101		185	0.233286	0.185511	0.115006	0.072427	0.0497556
185.2	0.20269	0.142665	0.0890512	0.0481047	0.0237002		185.2	0.233371	0.18451	0.114314	0.0717239	0.0489304
185.4	0.201983	0.142198	0.0887292	0.0477558	0.0231094		185.4	0.234236	0.184155	0.114238	0.0717604	0.0489658
185.6	0.201775	0.142177	0.0884046	0.0477977	0.0226199		185.6	0.234609	0.183529	0.114347	0.0717056	0.0490209
185.8	0.20137	0.141547	0.0881461	0.0472042	0.0222044		185.8	0.235162	0.183682	0.114118	0.0713804	0.0490057
186	0.201128	0.141549	0.0879006	0.0472719	0.0222579		186	0.235646	0.183994	0.113976	0.0721076	0.0491368
186.2	0.201235	0.141245	0.0877659	0.0472128	0.0220264		186.2	0.235063	0.183902	0.113568	0.0716045	0.0487428
186.4	0.200845	0.141518	0.0877615	0.0477149	0.0221928		186.4	0.235331	0.183539	0.113653	0.0714567	0.048689
186.6	0.20088	0.141556	0.0875696	0.0473779	0.0217503		186.6	0.235349	0.183816	0.113575	0.0717813	0.0488154
186.8	0.200383	0.141844	0.087576	0.0475689	0.0217813		186.8	0.235579	0.184627	0.11393	0.0720056	0.0487387
187	0.199995	0.141579	0.0871452	0.0475014	0.0214257		187	0.235306	0.184578	0.114194	0.0720222	0.04879
187.2	0.200498	0.142046	0.0872718	0.0475333	0.0215256		187.2	0.235017	0.184701	0.114433	0.0725577	0.0483833
187.4	0.201128	0.142423	0.087428	0.0479005	0.0217748		187.4	0.235374	0.184982	0.114983	0.0728537	0.0486073
187.6	0.200666	0.142457	0.087364	0.048039	0.0215135		187.6	0.235331	0.18502	0.115198	0.0727373	0.0486987
187.8	0.200782	0.1428	0.0869479	0.0473298	0.0210879		187.8	0.234869	0.185236	0.115423	0.0726164	0.0484921
188	0.200765	0.142944	0.0869313	0.0473641	0.0210104		188	0.235078	0.185163	0.115244	0.0722601	0.0480749
188.2	0.201156	0.1432	0.0869246	0.0471782	0.0208417		188.2	0.235285	0.185333	0.115216	0.0724906	0.048606
188.4	0.202394	0.14388	0.0874349	0.0473696	0.0211229		188.4	0.235531	0.186069	0.115469	0.0728344	0.0490092
188.6	0.20358	0.14388	0.088053	0.0472545	0.0213097		188.6	0.235745	0.186588	0.115656	0.0734646	0.0491545
188.8	0.204961	0.143833	0.0878272	0.0477133	0.0212396		188.8	0.236562	0.186351	0.115797	0.0740906	0.0496238
189	0.206088	0.144469	0.0883258	0.0481307	0.0216762		189	0.236238	0.186108	0.115837	0.0737072	0.0495439
189.2	0.20685	0.144793	0.0886649	0.0486923	0.0217915		189.2	0.236141	0.185903	0.115482	0.0731211	0.0496473
189.4	0.207652	0.145151	0.0895071	0.0490504	0.021989		189.4	0.236575	0.185944	0.11592	0.0734709	0.0506065
189.6	0.208048	0.145058	0.0894727	0.0489199	0.0218105		189.6	0.236626	0.186269	0.115478	0.0732617	0.0509173
189.8	0.208805	0.144914	0.090095	0.049551	0.0225565		189.8	0.236896	0.187504	0.11546	0.0735796	0.0515855
190	0.209203	0.145171	0.0906345	0.0502341	0.0234475		190	0.236814	0.188039	0.115498	0.0741622	0.0518871
190.2	0.20914	0.145174	0.0904793	0.0501815	0.0230794		190.2	0.236049	0.187887	0.114915	0.073854	0.0520086
190.4	0.208402	0.145008	0.0904492	0.0494816	0.0227366		190.4	0.235731	0.187913	0.114546	0.0732779	0.0521049
190.6	0.208207	0.145116	0.090737	0.0492184	0.0225845		190.6	0.235133	0.187716	0.113976	0.0726233	0.0516739
190.8	0.207029	0.144676	0.0903862	0.0490578	0.0222275		190.8	0.235419	0.188468	0.114117	0.0728102	0.051856
191	0.206864	0.144531	0.0904065	0.0489373	0.02217		191	0.235327	0.188132	0.113675	0.0725477	0.0513953
191.2	0.206541	0.144688	0.0905238	0.0487366	0.0220807		191.2	0.23557	0.188166	0.114164	0.0728743	0.0511228
191.4	0.205609	0.144664	0.0905144	0.0484442	0.0217608		191.4	0.235726	0.187504	0.114298	0.0723546	0.0505906
191.6	0.204709	0.144919	0.0904056	0.0481504	0.0212917		191.6	0.236109	0.187238	0.114709	0.0723727	0.0502951
191.8	0.204587	0.145171	0.0903735	0.0475488	0.0209983		191.8	0.236405	0.186556	0.11527	0.0722792	0.0500964
192	0.205042	0.145178	0.0912196	0.0474745	0.0215565		192	0.236423	0.185795	0.115081	0.0719313	0.049744
192.2	0.205265	0.145713	0.0914438	0.0471518	0.0221894		192.2	0.237015	0.185868	0.115311	0.0726583	0.0500466
192.4	0.205954	0.145921	0.0916889	0.0471187	0.0222692		192.4	0.237789	0.186005	0.115943	0.0732461	0.0502716
192.6	0.206397	0.145727	0.0911729	0.0468436	0.0220191		192.6	0.23809	0.186239	0.116566	0.0735664	0.0504556
192.8	0.206575	0.145896	0.0909202	0.047489	0.0218946		192.8	0.238054	0.186312	0.117036	0.0737563	0.0510097
193	0.206228	0.14603	0.0913388	0.0475066	0.022125		193	0.237765	0.186283	0.117697	0.0737407	0.0509851
193.2	0.206324	0.145719	0.0909914	0.0475337	0.0221443		193.2	0.238339	0.18653	0.118284	0.0742044	0.0514377
193.4	0.206571	0.145676	0.0915428	0.0480106	0.0224406		193.4	0.239116	0.186848	0.118825	0.0747539	0.0521476
193.6	0.207097	0.145645	0.0916977	0.0484656	0.0226676		193.6	0.239298	0.187381	0.118944	0.0746655	0.0522966
193.8	0.207447	0.145206	0.0917041	0.04858	0.0224204		193.8	0.239531	0.187679	0.118845	0.0748774	0.0527881
194	0.207553	0.14557	0.0918284	0.0485548	0.0225683		194	0.239312	0.187592	0.118754	0.0750818	0.0524945
194.2	0.20766	0.14567	0.0910453	0.0480008	0.0220118		194.2	0.239241	0.188104	0.118752	0.0751062	0.0525124
194.4	0.207957	0.145256	0.0909392	0.047672	0.022283		194.4	0.238956	0.18823	0.118279	0.0744518	0.0519889
194.6	0.20777	0.145211	0.0906234	0.0476229	0.0222264		194.6	0.238912	0.188533	0.118427	0.074567	0.0522288
194.8	0.207642	0.144637	0.0901532	0.0468312	0.0221944		194.8	0.239074	0.189389	0.118275	0.0748984	0.0522058
195	0.208614	0.145345	0.0906964	0.0473139	0.0232655		195	0.23914	0.1893	0.117728	0.0751525	0.0520556
195.2	0.209225	0.146284	0.0906545	0.0476809	0.0235403		195.2	0.23901	0.189291	0.117926	0.0755191	0.0518117
195.4	0.208997	0.146949	0.0906969	0.0479892	0.0241529		195.4	0.23865	0.188898	0.117336	0.0755075	0.0515949
195.6	0.209738	0.147485	0.0907358	0.0486169	0.0249253		195.6	0.238795	0.188853	0.117342	0.075488	0.0513938
195.8	0.210269	0.147842	0.0910789	0.0485835	0.0256133		195.8	0.238456	0.188421	0.117044	0.0751025	0.0512323
196	0.211253	0.148328	0.0917913	0.049287	0.0265434		196	0.23878	0.188664	0.11697	0.0753966	0.0512882
196.2	0.211325	0.148456	0.0916587	0.049253	0.0263499		196.2	0.23882	0.188875	0.116793	0.0755362	0.0511793
196.4	0.211199	0.148869	0.0919606	0.0495225	0.0258941		196.4	0.238868	0.18891	0.116523	0.0757662	0.0514651
196.6	0.211217	0.148796	0.0918493	0.0498032	0.0257379		196.6	0.238288	0.189168	0.11667	0.0758011	0.0513706
196.8	0.210941	0.148614	0.0924486	0.0506643	0.0257913		196.8	0.238267	0.189061	0.117025	0.0760346	0.0516689
197	0.210739	0.148541	0.0925487	0.0506427	0.0257203		197	0.238377	0.188632	0.116579	0.0755819	0.05101
197.2	0.210861	0.148164	0.0926172	0.0511401	0.0257676		197.2	0.238641	0.188494	0.116251	0.0748832	0.0506149
197.4	0.210414	0.14848	0.0929596	0.0515979	0.0259023		197.4	0.239086	0.188919	0.11637	0.0748914	0.0508423
197.6	0.210347	0.148503	0.0929014	0.051705	0.025311		197.6	0.239032	0.188793	0.116091	0.0740011	0.0503193
197.8	0.209898	0.148215	0.0927869	0.0516481	0.0248487		197.8	0.23944	0.189109	0.11641	0.0737679	0.0501981
198	0.209584	0.148829	0.0931653	0.051813	0.0249521		198	0.239452	0.189405	0.116697	0.0735314	0.0496104
198.2	0.209594	0.14875	0.092976	0.0514936	0.0248324		198.2	0.239437	0.189583	0.116512	0.0731603	0.0494441
198.4	0.209253	0.148017	0.0926781	0.0508995	0.0244535		198.4	0.239745	0.189369	0.116237	0.0731126	0.0495254
198.6	0.208957	0.147771	0.0924531	0.0501844	0.024023		198.6	0.23964	0.189606	0.116624	0.0729708	0.0499677
198.8	0.209098	0.147908	0.092547	0.0496703	0.0239155		198.8	0.239819	0.190032	0.116376	0.0728168	0.0498917
199	0.209926	0.148737	0.0932018	0.0509015	0.0250352		199	0.240236	0.190619	0.1166	0.0734319	0.0505081
199.2	0.209968	0.149138	0.0931798	0.0513078	0.0249807		199.2	0.240124	0.190965	0.116745	0.0739851	0.0506527
199.4	0.209374	0.1489	0.0933502	0.0512891	0.0250196		199.4	0.239961	0.190956	0.11663	0.0740488	0.0509889
199.6	0.210585	0.149161	0.0937383	0.051734	0.0254965		199.6	0.240058	0.190628	0.116522	0.0736433	0.050986
199.8	0.211298	0.149724	0.0942247	0.0517098	0.0251734		199.8	0.240512	0.190706	0.116507	0.0737315	0.0516955
200	0.211973	0.14987	0.0943345	0.0517268	0.0250217		200	0.240844	0.190551	0.116574	0.0735139	0.0517182
200.2	0.211826	0.149656	0.094348	0.0515014	0.0243292		200.2	0.240389	0.190231	0.115731	0.0729219	0.0512159
200.4	0.211522	0.14973	0.0940786	0.0513442	0.0233918		200.4	0.240726	0.190123	0.115895	0.0733294	0.0517846
200.6	0.21237	0.149419	0.0938404	0.0516399	0.0236166		200.6	0.240526	0.189746	0.116174	0.0732133	0.0518806
200.8	0.21225	0.149183	0.0938785	0.0519057	0.0236479		200.8	0.240701	0.189517	0.116164	0.0730318	0.0520024
201	0.212273	0.149352	0.0940121	0.0516943	0.0238265		201	0.24099	0.189698	0.11605	0.0729519	0.0518304
201.2	0.212501	0.148808	0.0940001	0.0516453	0.0238533		201.2	0.241146	0.189697	0.116304	0.0727699	0.0518391
201.4	0.212235	0.14909	0.0939621	0.0516487	0.0241149		201.4	0.241312	0.190074	0.117112	0.0729544	0.0517741
201.6	0.212928	0.150072	0.0947024	0.0522633	0.0244375		201.6	0.241523	0.189722	0.117642	0.0728453	0.05181
201.8	0.212488	0.150483	0.0946886	0.0523281	0.0246449		201.8	0.241739	0.189727	0.118479	0.0735899	0.0517618
202	0.212432	0.150585	0.0948338	0.0522545	0.0246694		202	0.241007	0.18976	0.118287	0.0733266	0.0518512
202.2	0.213076	0.150478	0.0947367	0.0520118	0.0246697		202.2	0.240913	0.189787	0.118359	0.0734917	0.0520781
202.4	0.213575	0.150476	0.0947839	0.0516335	0.0248216		202.4	0.241399	0.189863	0.118732	0.0739608	0.0527422
202.6	0.214039	0.150617	0.0954269	0.0518987	0.025173		202.6	0.241164	0.190118	0.11917	0.0739684	0.0530334
202.8	0.214472	0.151006	0.0957483	0.0519529	0.025445		202.8	0.241541	0.190377	0.119415	0.0747854	0.0531105
203	0.215165	0.151504	0.0965604	0.0526536	0.0262288		203	0.242063	0.190971	0.119958	0.0759566	0.0537073
203.2	0.214914	0.151448	0.0963217	0.0521963	0.0253394		203.2	0.241947	0.190646	0.11952	0.076164	0.0537582
203.4	0.214991	0.151242	0.0966898	0.052032	0.0254133		203.4	0.24224	0.19085	0.119128	0.0756001	0.0536851
203.6	0.215562	0.15165	0.0966813	0.052107	0.0254842		203.6	0.242375	0.190476	0.118548	0.0748707	0.05328
203.8	0.215728	0.152212	0.0967102	0.0520235	0.0252851		203.8	0.243109	0.190808	0.118481	0.0747152	0.0533824
204	0.215561	0.152004	0.0969733	0.0520182	0.0250486		204	0.24341	0.190878	0.118213	0.0741474	0.0531652
204.2	0.215102	0.151499	0.096471	0.0514081	0.02416		204.2	0.24377	0.190778	0.117746	0.0740345	0.0531662
204.4	0.215197	0.151128	0.0961869	0.0511806	0.023763		204.4	0.244435	0.190891	0.118024	0.0744225	0.0536008
204.6	0.2158	0.151348	0.0967275	0.0516757	0.0245375		204.6	0.244629	0.190915	0.117802	0.0742392	0.0531206
204.8	0.215209	0.150943	0.0964398	0.0512983	0.0242234		204.8	0.244708	0.191076	0.118063	0.0743009	0.0527318
205	0.215019	0.150973	0.0967428	0.051869	0.0244865		205	0.244577	0.190866	0.118272	0.0742361	0.0522348
205.2	0.215274	0.151438	0.0965991	0.0521292	0.0246771		205.2	0.245146	0.190371	0.118678	0.0741	0.0518471
205.4	0.215053	0.151804	0.0962094	0.0518982	0.0247968		205.4	0.245228	0.190569	0.119143	0.0743089	0.0516556
205.6	0.215217	0.152271	0.0959225	0.0525624	0.0246218		205.6	0.245519	0.191079	0.119966	0.074903	0.0520858
205.8	0.214522	0.151821	0.0950918	0.0524039	0.0244358		205.8	0.245512	0.191764	0.120281	0.0751063	0.0521573
206	0.214836	0.151522	0.0951953	0.0527944	0.0244255		206	0.245411	0.19266	0.120532	0.0752842	0.0529158
206.2	0.215711	0.15204	0.0953514	0.0532029	0.0245884		206.2	0.246364	0.193109	0.121331	0.0760533	0.053563
206.4	0.216208	0.152114	0.0950488	0.0528965	0.0248925		206.4	0.246436	0.193637	0.121478	0.0767057	0.0537341
206.6	0.216118	0.151698	0.0949295	0.0528573	0.0250544		206.6	0.246227	0.194128	0.121708	0.0769085	0.0535333
206.8	0.216396	0.151348	0.0945189	0.0522926	0.0246309		206.8	0.246066	0.194445	0.12194	0.0773083	0.0536331
207	0.216209	0.151437	0.0945653	0.0519125	0.0244995		207	0.245986	0.194488	0.121703	0.077333	0.0536252
207.2	0.215516	0.151326	0.0941796	0.0515523	0.0242516		207.2	0.245607	0.194623	0.121683	0.0771165	0.0537365
207.4	0.215715	0.151582	0.0946637	0.0520375	0.0246923		207.4	0.24566	0.195037	0.121627	0.0768199	0.0534892
207.6	0.216168	0.152593	0.0950207	0.0526115	0.0249044		207.6	0.245881	0.194854	0.121322	0.0764377	0.0534994
207.8	0.216794	0.152811	0.0955581	0.0527928	0.0254247		207.8	0.246103	0.194704	0.121018	0.0760545	0.0536358
208	0.216102	0.15256	0.0956555	0.0521848	0.0247382		208	0.245298	0.19432	0.120265	0.0751732	0.0530534
208.2	0.216063	0.152567	0.094907	0.0515285	0.0245938		208.2	0.245151	0.19384	0.120039	0.0748757	0.052909
208.4	0.216542	0.153305	0.0953016	0.0520511	0.0251018		208.4	0.245099	0.194133	0.120165	0.0750671	0.0524367
208.6	0.217019	0.154725	0.0958672	0.0525553	0.0255698		208.6	0.244757	0.19332	0.119811	0.0745734	0.0517667
208.8	0.216419	0.154359	0.0953693	0.0524964	0.0252488		208.8	0.244286	0.19262	0.119098	0.0739524	0.0512499
209	0.216432	0.154808	0.0957192	0.0532747	0.0256885		209	0.244285	0.192528	0.118815	0.0736408	0.0510872
209.2	0.216927	0.154798	0.0956292	0.0533171	0.0259955		209.2	0.245017	0.19239	0.118806	0.0737925	0.0513706
209.4	0.216916	0.154695	0.0956137	0.0536858	0.0261498		209.4	0.24466	0.192507	0.11871	0.073433	0.0513269
209.6	0.217327	0.155414	0.0960027	0.0547888	0.0268658		209.6	0.245658	0.193169	0.119296	0.0736391	0.0518001
209.8	0.217582	0.155289	0.0959616	0.0547002	0.0270509		209.8	0.246229	0.193599	0.119377	0.0741805	0.0519749
210	0.218336	0.154956	0.096097	0.0548736	0.027126		210	0.246546	0.194032	0.119755	0.0747519	0.0524015
210.2	0.219053	0.155009	0.0959862	0.054973	0.027324		210.2	0.247151	0.194399	0.120441	0.075219	0.0530011
210.4	0.218814	0.154536	0.0957738	0.0544456	0.0273014		210.4	0.247427	0.194466	0.120141	0.0754504	0.0530103
210.6	0.218223	0.153381	0.0958149	0.0544363	0.0270312		210.6	0.247417	0.194607	0.12073	0.0755002	0.0534724
210.8	0.218365	0.153207	0.0958148	0.0539762	0.0266548		210.8	0.247515	0.194923	0.12102	0.0756472	0.0535939
211	0.217911	0.153004	0.0954256	0.0537148	0.0263441		211	0.248096	0.195277	0.121697	0.0758314	0.0541644
211.2	0.217765	0.152807	0.0954289	0.0535216	0.0261307		211.2	0.248507	0.196067	0.122238	0.0761215	0.0549402
211.4	0.217711	0.152548	0.0953533	0.0535608	0.0257173		211.4	0.249057	0.196355	0.122461	0.0758788	0.0548662
211.6	0.217471	0.152717	0.095465	0.0534512	0.0257373		211.6	0.249243	0.196195	0.122267	0.0757894	0.054767
211.8	0.217439	0.152276	0.0955588	0.0526478	0.0255041		211.8	0.24875	0.195895	0.122275	0.0756803	0.0540185
212	0.216975	0.152159	0.0956088	0.0518668	0.0247183		212	0.248042	0.195977	0.122137	0.0755422	0.0540059
212.2	0.217235	0.151911	0.0952441	0.0512319	0.0246867		212.2	0.248399	0.195766	0.122469	0.0754463	0.0540159
212.4	0.217129	0.152663	0.0958781	0.0515595	0.0248577		212.4	0.248095	0.195796	0.122187	0.0756687	0.0537379
212.6	0.217453	0.153622	0.0965737	0.0519589	0.0249706		212.6	0.2478	0.195377	0.121471	0.0755211	0.0532258
212.8	0.217568	0.15388	0.097101	0.0525893	0.0254081		212.8	0.247813	0.195462	0.120663	0.0752773	0.0528329
213	0.217631	0.154386	0.0976636	0.0529257	0.0259415		213	0.248128	0.195272	0.120431	0.0753394	0.0526777
213.2	0.218042	0.154632	0.0979583	0.0531343	0.0265802		213.2	0.24842	0.194744	0.120036	0.0752935	0.0523239
213.4	0.217673	0.155221	0.098329	0.053145	0.0269366		213.4	0.248127	0.194579	0.119949	0.0752038	0.0520346
213.6	0.217808	0.155451	0.0983229	0.0526201	0.0271219		213.6	0.2486	0.195017	0.120463	0.0755089	0.0522881
213.8	0.217852	0.154952	0.0979615	0.0525999	0.0267723		213.8	0.248195	0.194744	0.120392	0.0759762	0.0520535
214	0.2185	0.155007	0.0980932	0.0527859	0.0268856		214	0.24885	0.194933	0.121102	0.0763826	0.0529568
214.2	0.218509	0.154798	0.0977755	0.0526022	0.0266372		214.2	0.24914	0.194601	0.121238	0.0764701	0.0532412
214.4	0.217835	0.15424	0.0971199	0.0524123	0.0264954		214.4	0.249112	0.194172	0.120867	0.0759412	0.0531611
214.6	0.21778	0.153489	0.0964192	0.0517915	0.0259918		214.6	0.248613	0.194456	0.120915	0.075744	0.0533757
214.8	0.217978	0.153633	0.095905	0.0512024	0.0256412		214.8	0.249213	0.195117	0.121183	0.0755926	0.0535297
215	0.217954	0.153316	0.095355	0.0506844	0.0251153		215	0.249624	0.195286	0.121289	0.0751538	0.0542273
215.2	0.218153	0.153175	0.0953398	0.0502711	0.0249451		215.2	0.249439	0.195369	0.120595	0.0748835	0.0539624
215.4	0.218135	0.153098	0.0951086	0.0509379	0.0247884		215.4	0.249288	0.195082	0.120475	0.0746114	0.0535628
215.6	0.218527	0.152888	0.095003	0.0507686	0.0248042		215.6	0.248554	0.19446	0.119843	0.0741127	0.0531147
215.8	0.218785	0.152465	0.0947797	0.0503586	0.0243484		215.8	0.24862	0.194732	0.119967	0.0739536	0.0530192
216	0.218788	0.152301	0.0943877	0.0501678	0.0240638		216	0.248611	0.19452	0.119387	0.0736501	0.0533262
216.2	0.218927	0.152851	0.0943508	0.050341	0.0242404		216.2	0.248087	0.194046	0.119156	0.0736021	0.0527066
216.4	0.21958	0.154258	0.0952904	0.0513644	0.0245054		216.4	0.248335	0.194206	0.119014	0.074011	0.0524997
216.6	0.220151	0.154977	0.095949	0.051572	0.0245895		216.6	0.248658	0.194764	0.119195	0.0739185	0.052416
216.8	0.220565	0.155404	0.0965913	0.0526233	0.0251446		216.8	0.248909	0.194298	0.119195	0.0737896	0.052025
217	0.220759	0.155908	0.0973463	0.0528765	0.0256519		217	0.249894	0.194879	0.119894	0.0743734	0.0526239
217.2	0.221344	0.156444	0.0977388	0.0532407	0.0259859		217.2	0.250161	0.195361	0.12039	0.0746837	0.0528822
217.4	0.221417	0.156986	0.0980932	0.0535205	0.0261546		217.4	0.250184	0.195833	0.121346	0.0755563	0.053101
217.6	0.222184	0.158025	0.0982365	0.0537257	0.0265849		217.6	0.250869	0.196451	0.122151	0.0761926	0.0537589
217.8	0.222692	0.158174	0.0985623	0.0546307	0.026892		217.8	0.251257	0.196408	0.122505	0.0763847	0.0534964
218	0.222949	0.158157	0.0984522	0.0544728	0.0267478		218	0.252069	0.196952	0.122943	0.0768797	0.0539362
218.2	0.222411	0.15748	0.0977552	0.0538659	0.0264107		218.2	0.251774	0.196669	0.122555	0.076688	0.0536189
218.4	0.222351	0.157026	0.0974631	0.0535531	0.0264779		218.4	0.252767	0.197713	0.123107	0.0769849	0.0540695
218.6	0.222313	0.157017	0.0977095	0.0532391	0.0262686		218.6	0.253552	0.198334	0.123036	0.0777025	0.0546863
218.8	0.222329	0.157239	0.0980261	0.0536588	0.0263496		218.8	0.25416	0.199109	0.123225	0.0780223	0.0549847
219	0.221738	0.157377	0.0981021	0.0538707	0.0263972		219	0.254466	0.199332	0.123181	0.0777324	0.0553801
219.2	0.221236	0.156454	0.0975763	0.0536068	0.0259451		219.2	0.254392	0.199031	0.122836	0.0774555	0.0551376
219.4	0.220659	0.156001	0.0970434	0.0533295	0.0256332		219.4	0.25444	0.198982	0.122706	0.0776438	0.0549643
219.6	0.220211	0.155188	0.0963172	0.0524408	0.0252687		219.6	0.254249	0.198741	0.122183	0.077056	0.0549901
219.8	0.220053	0.155191	0.0957841	0.0519674	0.0246604		219.8	0.254851	0.198896	0.121889	0.0774386	0.0549875
220	0.219583	0.154454	0.0952079	0.0512988	0.0240664		220	0.254166	0.198164	0.1211	0.0773627	0.0546179
220.2	0.21947	0.154389	0.0951414	0.0508318	0.0240482		220.2	0.253789	0.198185	0.121204	0.0773392	0.0545754
220.4	0.21955	0.154963	0.0954507	0.0509639	0.0240025		220.4	0.254586	0.198955	0.121551	0.0774983	0.0550051
220.6	0.22009	0.155087	0.0960719	0.0509725	0.0243586		220.6	0.254208	0.199018	0.121612	0.0773106	0.0550276
220.8	0.22073	0.155567	0.0966598	0.0516085	0.0249322		220.8	0.253938	0.198903	0.121645	0.077691	0.0547754
221	0.221358	0.156222	0.0972466	0.0518206	0.0257988		221	0.25425	0.199613	0.122069	0.078283	0.0549329
221.2	0.222005	0.157003	0.0976202	0.0523101	0.0263526		221.2	0.25379	0.199462	0.121865	0.0780605	0.0542944
221.4	0.222988	0.157757	0.0981794	0.0527156	0.0266043		221.4	0.253783	0.199625	0.122191	0.0784916	0.0541475
221.6	0.223563	0.157941	0.0986325	0.0529673	0.0269711		221.6	0.254279	0.199796	0.122375	0.0783207	0.0543028
221.8	0.22442	0.157773	0.0991143	0.0536333	0.0273479		221.8	0.254244	0.19975	0.122686	0.0779459	0.0541447
222	0.225048	0.157775	0.0994073	0.0536469	0.0278184		222	0.254068	0.200081	0.122859	0.078499	0.0542919
222.2	0.225349	0.157669	0.0999937	0.05382	0.0282127		222.2	0.254341	0.200385	0.123532	0.0785132	0.0547589
222.4	0.225748	0.157799	0.100505	0.0541643	0.0286271		222.4	0.255162	0.201045	0.124267	0.0792095	0.0553761
222.6	0.225665	0.158049	0.101053	0.0548289	0.0290463		222.6	0.255854	0.201451	0.124418	0.0802238	0.0562583
222.8	0.22567	0.157801	0.101378	0.0551525	0.0291979		222.8	0.256051	0.201415	0.125092	0.0802401	0.0561285
223	0.225207	0.157492	0.101193	0.0554177	0.0290437		223	0.256237	0.201426	0.125746	0.0801995	0.0564234
223.2	0.225273	0.156845	0.100941	0.055042	0.0282769		223.2	0.256314	0.20128	0.125633	0.080438	0.0565822
223.4	0.225257	0.1567	0.100498	0.0546796	0.0280353		223.4	0.256741	0.201126	0.125515	0.0807446	0.0568377
223.6	0.225878	0.156944	0.100517	0.055101	0.0280142		223.6	0.256974	0.200897	0.125424	0.0800901	0.0572026
223.8	0.225575	0.157044	0.100206	0.0548012	0.027366		223.8	0.25701	0.201086	0.125525	0.0803396	0.0568103
224	0.224935	0.156554	0.0999395	0.0544135	0.0267941		224	0.256121	0.200501	0.125174	0.0798896	0.0565547
224.2	0.22471	0.157178	0.100187	0.0547461	0.0271142		224.2	0.256331	0.200418	0.1251	0.0797405	0.0566311
224.4	0.225127	0.157972	0.101084	0.0554413	0.0272648		224.4	0.256495	0.200893	0.125164	0.0797422	0.0563634
224.6	0.225502	0.158157	0.101136	0.0553271	0.0271987		224.6	0.255478	0.200186	0.124819	0.0791259	0.0556135
224.8	0.225279	0.158366	0.100988	0.0550738	0.0269727		224.8	0.25488	0.199931	0.12404	0.0788321	0.0551891
225	0.225262	0.158697	0.10117	0.0553196	0.0270781		225	0.254664	0.199389	0.123518	0.078341	0.0543603
225.2	0.226083	0.159675	0.101484	0.0555957	0.0272244		225.2	0.25506	0.199407	0.123259	0.0781625	0.0543998
225.4	0.226532	0.159859	0.101721	0.0554166	0.0271467		225.4	0.25491	0.198835	0.122717	0.077803	0.0542398
225.6	0.226434	0.159694	0.101525	0.0554742	0.0273277		225.6	0.25486	0.198323	0.122493	0.0773184	0.0541263
225.8	0.226992	0.15986	0.10136	0.0555283	0.0275229		225.8	0.254688	0.19862	0.122388	0.0771952	0.0545759
226	0.226724	0.160016	0.101225	0.0554918	0.027698		226	0.254597	0.198584	0.122326	0.077291	0.0544001
226.2	0.226466	0.160236	0.10086	0.0553985	0.0273467		226.2	0.254977	0.198634	0.122684	0.0773952	0.0546191
226.4	0.22635	0.160289	0.10068	0.0555729	0.0273333		226.4	0.255427	0.198785	0.122967	0.0780399	0.054743
226.6	0.22615	0.160132	0.100397	0.055228	0.0273403		226.6	0.255942	0.198983	0.123661	0.0783552	0.0545508
226.8	0.225972	0.15974	0.0999718	0.0547745	0.0268505		226.8	0.256321	0.198858	0.124045	0.0785089	0.0545505
227	0.225765	0.15954	0.0994838	0.0546568	0.0267639		227	0.256198	0.199033	0.124231	0.0786529	0.0547823
227.2	0.225679	0.159214	0.0989935	0.0542617	0.0261264		227.2	0.256304	0.198559	0.124395	0.0787727	0.0548003
227.4	0.225951	0.158931	0.0988118	0.0544207	0.0258573		227.4	0.256821	0.198875	0.124868	0.0786477	0.0551782
227.6	0.226095	0.159185	0.0991434	0.0547308	0.0257964		227.6	0.256677	0.199204	0.125255	0.0786394	0.0550868
227.8	0.225292	0.158752	0.0988417	0.05448	0.0254696		227.8	0.256317	0.199123	0.125427	0.0787329	0.0543984
228	0.225637	0.158656	0.0994213	0.0549335	0.0254079		228	0.255989	0.199015	0.12511	0.0786199	0.0540245
228.2	0.225769	0.158907	0.0997153	0.0554167	0.0259012		228.2	0.25662	0.200032	0.125815	0.0793043	0.0539989
228.4	0.226615	0.159073	0.100043	0.0557388	0.0264022		228.4	0.256687	0.200897	0.125818	0.0795376	0.0539822
228.6	0.22632	0.159231	0.0994276	0.0554626	0.0260009		228.6	0.256261	0.200722	0.125157	0.0794105	0.0537727
228.8	0.226111	0.158977	0.0994168	0.0553568	0.0260994		228.8	0.255905	0.200673	0.124388	0.0795339	0.0536294
229	0.226258	0.159094	0.0995972	0.0553085	0.0265918		229	0.255864	0.200713	0.124323	0.0792043	0.0533608
229.2	0.22684	0.15921	0.099875	0.0552893	0.0272158		229.2	0.256181	0.201196	0.123844	0.0797639	0.0534794
229.4	0.226326	0.158849	0.1002	0.0553882	0.0271324		229.4	0.256103	0.20116	0.12344	0.0794611	0.0536176
229.6	0.226286	0.158604	0.100202	0.0558178	0.0270698		229.6	0.256255	0.201677	0.123532	0.0793313	0.0539732
229.8	0.226387	0.158632	0.100278	0.0562775	0.0274753		229.8	0.256821	0.202441	0.123672	0.079034	0.0541666
230	0.227317	0.159411	0.100892	0.0569962	0.0281381		230	0.256243	0.201657	0.123204	0.0787216	0.053542
230.2	0.227831	0.159757	0.101401	0.057158	0.0280962		230.2	0.255626	0.201032	0.123069	0.0782176	0.0532114
230.4	0.227972	0.160035	0.101524	0.0569242	0.0283893		230.4	0.255185	0.200369	0.122964	0.0779164	0.0526788
230.6	0.228279	0.160215	0.101314	0.0563756	0.0283489		230.6	0.255174	0.200115	0.123127	0.0780269	0.053018
230.8	0.228497	0.160199	0.101315	0.0562259	0.0282593		230.8	0.255616	0.199621	0.122854	0.0783226	0.0537748
231	0.228617	0.160299	0.101122	0.0560401	0.0284754		231	0.25573	0.199525	0.123155	0.0780417	0.053967
231.2	0.229326	0.161053	0.101536	0.0567505	0.028561		231.2	0.256693	0.199993	0.124065	0.0790654	0.0546743
231.4	0.229968	0.161287	0.101966	0.0568973	0.028291		231.4	0.257822	0.201039	0.124524	0.0797611	0.0554507
231.6	0.230094	0.161655	0.101934	0.0568519	0.0287395		231.6	0.258155	0.200791	0.124505	0.0803054	0.0556485
231.8	0.230531	0.162044	0.101818	0.0572643	0.0288067		231.8	0.259162	0.201837	0.125457	0.0812731	0.0560817
232	0.230956	0.162328	0.102139	0.0578866	0.0288346		232	0.260219	0.202822	0.126068	0.0820468	0.0567911
232.2	0.231176	0.162935	0.101917	0.0576543	0.0291592		232.2	0.261045	0.203705	0.127005	0.0830339	0.0576826
232.4	0.230955	0.163218	0.101872	0.0576663	0.0294131		232.4	0.261573	0.204012	0.126803	0.0831029	0.057854
232.6	0.230258	0.163454	0.101499	0.0576252	0.0288553		232.6	0.262199	0.204619	0.127244	0.0834021	0.058357
232.8	0.229951	0.163285	0.101312	0.0571854	0.0289282		232.8	0.262326	0.204544	0.127278	0.0838579	0.0585942
233	0.230156	0.163488	0.101384	0.0569219	0.028966		233	0.263065	0.205001	0.127634	0.0841032	0.0589323
233.2	0.23028	0.163431	0.102021	0.0577185	0.0290489		233.2	0.263315	0.205262	0.127465	0.0842607	0.0587338
233.4	0.230154	0.163379	0.102347	0.0578948	0.0288914		233.4	0.263501	0.205501	0.127844	0.0832955	0.05898
233.6	0.230191	0.163491	0.10206	0.0578471	0.0287741		233.6	0.262987	0.205654	0.128049	0.0827638	0.0587099
233.8	0.230448	0.163688	0.102227	0.0578865	0.0294148		233.8	0.26288	0.205406	0.127976	0.0822715	0.0581962
234	0.230843	0.163481	0.102233	0.057168	0.0293811		234	0.261979	0.204833	0.127378	0.0818399	0.0578267
234.2	0.230579	0.163262	0.102155	0.0563748	0.028999		234.2	0.2614	0.204745	0.127351	0.0814403	0.0577683
234.4	0.230659	0.163224	0.101572	0.0554793	0.0289249		234.4	0.26151	0.204686	0.127535	0.0812759	0.0576124
234.6	0.230931	0.163383	0.101777	0.0553429	0.0286592		234.6	0.26193	0.204898	0.127502	0.0809374	0.0579369
234.8	0.230831	0.162925	0.101387	0.0549179	0.0287515		234.8	0.263062	0.205498	0.127802	0.0814435	0.0581851
235	0.230565	0.162912	0.101002	0.0544798	0.0287197		235	0.263083	0.20603	0.127872	0.0813763	0.057843
235.2	0.23096	0.16304	0.100479	0.0542196	0.028226		235.2	0.263133	0.206312	0.128073	0.0817221	0.0576978
235.4	0.231104	0.163158	0.100236	0.0535722	0.0276229		235.4	0.263258	0.206608	0.128342	0.0819171	0.0579935
235.6	0.231335	0.163386	0.100438	0.0541282	0.027898		235.6	0.263416	0.206803	0.128836	0.0819712	0.057971
235.8	0.231892	0.163343	0.100805	0.0543126	0.0279085		235.8	0.263584	0.207069	0.129256	0.0823102	0.057652
236	0.231877	0.163404	0.100855	0.0543133	0.0283979		236	0.263763	0.206776	0.129304	0.0822929	0.0574674
236.2	0.232217	0.163728	0.10126	0.0544548	0.0286128		236.2	0.263459	0.20654	0.129135	0.0823185	0.0570299
236.4	0.232086	0.163597	0.101427	0.0543887	0.0285196		236.4	0.263746	0.206139	0.128844	0.0824765	0.0569803
236.6	0.231902	0.163596	0.101427	0.0544987	0.0281275		236.6	0.263764	0.205888	0.128765	0.0830515	0.0573346
236.8	0.232455	0.163662	0.101979	0.0549087	0.0282955		236.8	0.263429	0.205114	0.128163	0.0831906	0.0569955
237	0.232193	0.163585	0.102404	0.0553895	0.0282834		237	0.26328	0.204624	0.128218	0.0829425	0.0568519
237.2	0.231833	0.16305	0.102773	0.0557807	0.0281785		237.2	0.262738	0.204182	0.128238	0.0824618	0.0568176
237.4	0.232089	0.162932	0.102953	0.055366	0.0282778		237.4	0.26242	0.203644	0.128187	0.0817601	0.056953
237.6	0.23181	0.162664	0.10253	0.0551689	0.0277072		237.6	0.262204	0.20303	0.128056	0.0819418	0.0570374
237.8	0.231943	0.162233	0.102631	0.0549162	0.0281725		237.8	0.262008	0.202727	0.127608	0.0819446	0.0568187
238	0.231878	0.161529	0.102716	0.054999	0.0280427		238	0.261551	0.203067	0.127285	0.08163	0.0567987
238.2	0.232505	0.161405	0.102604	0.0551491	0.0279059		238.2	0.261462	0.203515	0.127466	0.0817831	0.0572845
238.4	0.232895	0.161644	0.102684	0.0553475	0.0280442		238.4	0.262018	0.203595	0.127218	0.0813953	0.0572642
238.6	0.233526	0.162045	0.102943	0.0559427	0.0281368		238.6	0.26223	0.204316	0.127209	0.0810822	0.0573376
238.8	0.233151	0.161914	0.102237	0.0555466	0.0279994		238.8	0.262613	0.204983	0.127356	0.0814295	0.0575402
239	0.233279	0.16233	0.101895	0.0555527	0.0275551		239	0.261929	0.204909	0.12707	0.080428	0.0574048
239.2	0.23386	0.163007	0.101792	0.0556056	0.027624		239.2	0.262156	0.205321	0.127381	0.0805274	0.0577673
239.4	0.234422	0.163491	0.102414	0.0561208	0.0279798		239.4	0.262652	0.205773	0.127722	0.08112	0.0581074
239.6	0.234667	0.163364	0.102637	0.0565782	0.0280309		239.6	0.262806	0.205905	0.12754	0.0810354	0.0577516
239.8	0.234914	0.163324	0.102485	0.056477	0.02812		239.8	0.262576	0.205842	0.127256	0.0810485	0.0573739
240	0.234718	0.163031	0.101892	0.0561642	0.0280611		240	0.263016	0.206455	0.126855	0.0814232	0.0571816
240.2	0.234825	0.163075	0.102233	0.0566709	0.0275263		240.2	0.262969	0.206363	0.12655	0.0813214	0.056886
240.4	0.234663	0.163461	0.102425	0.0565852	0.0274358		240.4	0.263056	0.206	0.126607	0.0816042	0.0568145
240.6	0.234666	0.16406	0.103048	0.0575063	0.0277966		240.6	0.263123	0.205875	0.126276	0.0816691	0.0567014
240.8	0.234783	0.164487	0.103534	0.0580448	0.0281752		240.8	0.263178	0.205231	0.126101	0.0811792	0.0562724
241	0.233691	0.16412	0.103433	0.0577782	0.0278234		241	0.263145	0.205081	0.126269	0.0807116	0.0562375
241.2	0.233812	0.164535	0.103474	0.0577716	0.0277928		241.2	0.263103	0.205105	0.126184	0.0805508	0.0564903
241.4	0.234133	0.164927	0.103693	0.0581217	0.0279684		241.4	0.262622	0.204415	0.125631	0.0798977	0.0557896
241.6	0.23399	0.165292	0.103601	0.0578958	0.0277494		241.6	0.263141	0.204302	0.12582	0.0801859	0.0558484
241.8	0.233996	0.164957	0.103679	0.0578663	0.0279169		241.8	0.263192	0.204516	0.125773	0.0803182	0.0558506
242	0.234591	0.165188	0.103859	0.0584373	0.0283583		242	0.263749	0.205045	0.126439	0.0802582	0.0562671
242.2	0.235166	0.165332	0.103817	0.0583975	0.0286153		242.2	0.2639	0.205041	0.126577	0.080439	0.0566986
242.4	0.235556	0.165738	0.104257	0.0589617	0.0289756		242.4	0.264258	0.204846	0.126858	0.0802852	0.0566897
242.6	0.23605	0.165928	0.104313	0.0590145	0.0287757		242.6	0.264756	0.205371	0.127465	0.0803526	0.057177
242.8	0.235836	0.166115	0.103933	0.0591227	0.0286803		242.8	0.264703	0.205292	0.127803	0.0801984	0.0571502
243	0.236239	0.166041	0.103631	0.0596626	0.0287971		243	0.265049	0.205282	0.128039	0.0799595	0.057203
243.2	0.235931	0.165466	0.103597	0.0597096	0.0288134		243.2	0.265179	0.205439	0.128034	0.080557	0.0571889
243.4	0.235944	0.164544	0.103034	0.0597254	0.0277934		243.4	0.265418	0.205487	0.127669	0.0807055	0.0574094
243.6	0.235361	0.163975	0.102514	0.0593072	0.0268813		243.6	0.265815	0.206349	0.127889	0.0811102	0.0575354
243.8	0.235187	0.163813	0.102372	0.0593762	0.0265829		243.8	0.26616	0.206716	0.127986	0.0811204	0.0572407
244	0.235342	0.16337	0.102297	0.059569	0.0263536		244	0.266134	0.206975	0.127622	0.081045	0.0568553
244.2	0.236033	0.16407	0.103013	0.0603529	0.0264066		244.2	0.266815	0.207262	0.128232	0.0815914	0.0569967
244.4	0.235767	0.164165	0.103194	0.0603415	0.0266412		244.4	0.267039	0.207137	0.128592	0.0818354	0.0569043
244.6	0.235698	0.164474	0.103332	0.0604076	0.0262932		244.6	0.267096	0.207489	0.128426	0.0815745	0.0570795
244.8	0.235473	0.164506	0.103126	0.0600988	0.0262612		244.8	0.266978	0.207687	0.128662	0.0810933	0.0568139
245	0.235316	0.164704	0.103147	0.0602221	0.0263169		245	0.267701	0.208322	0.128616	0.0811931	0.0570973
245.2	0.235197	0.165548	0.103011	0.0604051	0.0266125		245.2	0.267791	0.208473	0.128626	0.081497	0.0572032
245.4	0.235515	0.165907	0.103563	0.0604504	0.0267551		245.4	0.26801	0.20848	0.128773	0.081944	0.0572287
245.6	0.235463	0.166341	0.103562	0.0601559	0.0271145		245.6	0.268703	0.208357	0.12895	0.0821094	0.0578626
245.8	0.236171	0.166794	0.104066	0.06044	0.027716		245.8	0.269081	0.208575	0.128862	0.082369	0.0582595
246	0.236891	0.167539	0.104069	0.0602988	0.0281225		246	0.268759	0.209151	0.129286	0.082516	0.058125
246.2	0.237609	0.167796	0.104447	0.0607687	0.0282785		246.2	0.268581	0.209256	0.129385	0.0829007	0.0582698
246.4	0.238147	0.168079	0.104369	0.0605923	0.028413		246.4	0.269261	0.209966	0.130016	0.0833941	0.0585205
246.6	0.238571	0.16853	0.104772	0.0607212	0.0286892		246.6	0.269326	0.210612	0.13045	0.0835388	0.0590184
246.8	0.238763	0.168993	0.105009	0.0610655	0.0289929		246.8	0.268895	0.210696	0.130319	0.0830549	0.0586535
247	0.238861	0.168795	0.10525	0.0611931	0.0293293		247	0.269441	0.210796	0.130445	0.08341	0.0584767
247.2	0.238371	0.16784	0.105332	0.0611676	0.0289202		247.2	0.269325	0.211161	0.129886	0.083284	0.0587585
247.4	0.239232	0.167753	0.105306	0.0611153	0.0285605		247.4	0.270026	0.211369	0.130027	0.0834547	0.0591175
247.6	0.239102	0.167878	0.105592	0.0612425	0.0285401		247.6	0.26988	0.211217	0.130466	0.0833432	0.0592763
247.8	0.24	0.168225	0.106171	0.0618559	0.0290841		247.8	0.26996	0.210903	0.130747	0.0831684	0.0590795
248	0.240848	0.168232	0.106444	0.0619272	0.029616		248	0.269946	0.210736	0.13045	0.0828563	0.0587801
248.2	0.241058	0.168266	0.106552	0.0621099	0.0298527		248.2	0.270955	0.210911	0.131	0.0833937	0.0590828
248.4	0.240122	0.167511	0.105771	0.0616653	0.0292382		248.4	0.271142	0.210912	0.131538	0.0831643	0.059429
248.6	0.240074	0.16772	0.105494	0.0616354	0.0292071		248.6	0.270611	0.210952	0.13139	0.0826316	0.0592516
248.8	0.239848	0.167269	0.105531	0.0616642	0.0295199		248.8	0.27048	0.210346	0.131004	0.0821297	0.0588162
249	0.239456	0.167387	0.105296	0.0615918	0.0293491		249	0.270824	0.209948	0.130212	0.0819886	0.0585048
249.2	0.23974	0.167784	0.1054	0.06147	0.0293072		249.2	0.269729	0.209831	0.130131	0.0817798	0.0581362
249.4	0.240165	0.167814	0.105244	0.0613941	0.0292284		249.4	0.270087	0.209585	0.13016	0.082265	0.0582488
249.6	0.240213	0.167912	0.105313	0.0616919	0.0295769		249.6	0.270133	0.20991	0.129718	0.0822464	0.0582329
249.8	0.24118	0.16855	0.106322	0.0618943	0.0301075		249.8	0.27035	0.21064	0.129988	0.0827757	0.0583204
250	0.241534	0.168402	0.106126	0.0614365	0.0298243		250	0.269917	0.210893	0.130078	0.0829592	0.0577304
250.2	0.241921	0.168637	0.106478	0.0619326	0.0301627		250.2	0.270464	0.211542	0.130741	0.0838656	0.0581841
250.4	0.24191	0.168813	0.106868	0.0614952	0.030731		250.4	0.271113	0.212098	0.130964	0.0843723	0.0584109
250.6	0.241677	0.16923	0.107473	0.0617077	0.030915		250.6	0.271097	0.212456	0.131391	0.0844073	0.0588307
250.8	0.241252	0.168771	0.107399	0.0611217	0.0304629		250.8	0.271427	0.212561	0.131257	0.0845755	0.058895
251	0.240905	0.168585	0.107533	0.0613979	0.0306543		251	0.271996	0.212789	0.131601	0.0851781	0.0590482
251.2	0.240432	0.167927	0.106773	0.0606674	0.0298357		251.2	0.271551	0.212246	0.130831	0.0842541	0.0588608
251.4	0.240816	0.168263	0.106738	0.0605528	0.0294738		251.4	0.272356	0.212368	0.131398	0.0844875	0.0591627
251.6	0.240524	0.168398	0.106523	0.0605979	0.0294152		251.6	0.271965	0.211881	0.13146	0.0839397	0.0593392
251.8	0.240657	0.168432	0.106321	0.0605183	0.0297115		251.8	0.272244	0.211702	0.131553	0.0841432	0.0590921
252	0.240297	0.168674	0.106059	0.0605569	0.0300805		252	0.272687	0.21135	0.131515	0.0836207	0.0589562
252.2	0.23997	0.168892	0.106108	0.0606834	0.0303005		252.2	0.273036	0.211217	0.132108	0.0841587	0.0593311
252.4	0.239344	0.168927	0.105957	0.0600704	0.0300916		252.4	0.272415	0.210857	0.132045	0.0837876	0.0592101
252.6	0.239528	0.169268	0.106538	0.059821	0.0306187		252.6	0.271539	0.209977	0.131172	0.0828843	0.0581394
252.8	0.239713	0.169292	0.106817	0.0593853	0.0305966		252.8	0.271153	0.208987	0.130602	0.0823722	0.0575128
253	0.2401	0.169631	0.107039	0.0593996	0.0307035		253	0.270798	0.208776	0.130327	0.0820615	0.0570291
253.2	0.240643	0.16995	0.107431	0.059738	0.030918		253.2	0.270493	0.209037	0.130091	0.082308	0.0569962
253.4	0.240866	0.169824	0.10761	0.0603795	0.0310885		253.4	0.270831	0.208829	0.130074	0.0827022	0.0569103
253.6	0.241704	0.170172	0.108223	0.0608551	0.0315234		253.6	0.27022	0.209003	0.129456	0.0824036	0.0564516
253.8	0.241932	0.1699	0.108493	0.0610153	0.0314036		253.8	0.269681	0.208554	0.129205	0.081879	0.0559417
254	0.242385	0.170002	0.108518	0.0612217	0.0313675		254	0.269449	0.208477	0.12888	0.0815612	0.0553054
254.2	0.242795	0.170523	0.108801	0.061728	0.031294		254.2	0.27018	0.209098	0.129502	0.0821005	0.0558229
254.4	0.243242	0.170433	0.10904	0.0619275	0.0315065		254.4	0.270989	0.209271	0.129632	0.0821629	0.0563186
254.6	0.243428	0.170616	0.108864	0.0622759	0.0311393		254.6	0.271046	0.209824	0.129185	0.0817862	0.0566125
254.8	0.243374	0.170221	0.108645	0.0624117	0.0306009		254.8	0.271637	0.210358	0.128912	0.0822926	0.0567801
255	0.243865	0.171125	0.108657	0.0629973	0.0310889		255	0.271246	0.210489	0.128576	0.082191	0.0565335
255.2	0.244136	0.171226	0.108168	0.0628184	0.0305885		255.2	0.270935	0.210039	0.128019	0.0812513	0.0561413
255.4	0.244184	0.171417	0.108031	0.0630543	0.0307461		255.4	0.272041	0.211031	0.128615	0.0818684	0.0568232
255.6	0.243976	0.171559	0.107799	0.0632103	0.0310069		255.6	0.271887	0.210682	0.12812	0.0816062	0.0562959
255.8	0.243772	0.171568	0.107746	0.0634143	0.0311306		255.8	0.272066	0.210343	0.127819	0.0818022	0.0558032
256	0.243483	0.17196	0.107763	0.0632625	0.0315298		256	0.272352	0.210607	0.127941	0.0819202	0.0561311
256.2	0.242863	0.171591	0.107578	0.0624304	0.0312023		256.2	0.272091	0.210209	0.12796	0.0825418	0.0562167
256.4	0.242807	0.171393	0.107794	0.061968	0.0310283		256.4	0.271765	0.210018	0.127402	0.0823417	0.0559563
256.6	0.242527	0.171232	0.107824	0.0615173	0.0310915		256.6	0.271966	0.209978	0.127324	0.0821612	0.0559381
256.8	0.242284	0.170677	0.107142	0.0608641	0.0307016		256.8	0.271833	0.21008	0.127623	0.0826313	0.0562873
257	0.241486	0.170132	0.107285	0.0605183	0.0304583		257	0.271971	0.210623	0.127994	0.0831056	0.0565308
257.2	0.241279	0.169445	0.107037	0.0602239	0.029963		257.2	0.272567	0.211424	0.128717	0.0839144	0.0572392
257.4	0.241233	0.16909	0.107273	0.0599293	0.0299477		257.4	0.272379	0.211326	0.129718	0.0842125	0.0574127
257.6	0.241612	0.169206	0.107209	0.0598024	0.029773		257.6	0.272686	0.212044	0.130418	0.0848663	0.0577004
257.8	0.241318	0.168948	0.107678	0.0598839	0.0295354		257.8	0.273063	0.212225	0.131475	0.0854411	0.0582458
258	0.241746	0.168911	0.107659	0.05973	0.0293254		258	0.273655	0.212605	0.13241	0.0858525	0.0586259
258.2	0.242144	0.169086	0.107976	0.059964	0.0292325		258.2	0.274382	0.213334	0.133254	0.0867449	0.0595187
258.4	0.242155	0.168826	0.107768	0.0595985	0.0292481		258.4	0.27459	0.213547	0.133512	0.0867385	0.0602142
258.6	0.242552	0.169198	0.107991	0.059779	0.0292313		258.6	0.274355	0.214055	0.133299	0.0868096	0.0602257
258.8	0.242789	0.17006	0.108601	0.0602664	0.0297143		258.8	0.274654	0.214392	0.134093	0.0874648	0.0603938
259	0.244165	0.171556	0.109275	0.0610909	0.0307939		259	0.274049	0.213667	0.133322	0.086764	0.0593543
259.2	0.244225	0.172032	0.109447	0.0612549	0.0305877		259.2	0.274353	0.213191	0.133308	0.0861953	0.0591526
259.4	0.244157	0.172314	0.109484	0.0612184	0.0304827		259.4	0.274962	0.213447	0.133232	0.086177	0.0589354
259.6	0.244513	0.173167	0.109559	0.0619038	0.0303886		259.6	0.274714	0.212826	0.132396	0.0856338	0.0583492
259.8	0.244621	0.173789	0.109781	0.0623302	0.030509		259.8	0.274824	0.212633	0.132247	0.0857109	0.0583822
260	0.24455	0.174014	0.109423	0.0622981	0.0303245		260	0.274564	0.212495	0.131857	0.0855777	0.0584009
260.2	0.244113	0.17387	0.108952	0.0624868	0.0300166		260.2	0.274878	0.21234	0.131303	0.0850114	0.0582843
260.4	0.244617	0.174342	0.108858	0.0629373	0.0304539		260.4	0.27519	0.212433	0.13111	0.0848388	0.0586177
260.6	0.244175	0.174101	0.108132	0.0624817	0.0301958		260.6	0.275361	0.212169	0.131631	0.084419	0.0590175
260.8	0.244305	0.173718	0.107502	0.0623092	0.0304994		260.8	0.275316	0.212411	0.131916	0.0845999	0.059295
261	0.244136	0.173489	0.107366	0.0619656	0.0305397		261	0.275783	0.213114	0.132483	0.0852454	0.0597443
261.2	0.244083	0.173216	0.107686	0.062341	0.0306057		261.2	0.276188	0.213577	0.133024	0.0851975	0.0601805
261.4	0.243906	0.173613	0.108188	0.0625659	0.03097		261.4	0.276254	0.213832	0.132976	0.0855264	0.0601451
261.6	0.244098	0.173452	0.10789	0.0628099	0.0306932		261.6	0.276842	0.214781	0.133285	0.0856188	0.0607848
261.8	0.243411	0.172574	0.107199	0.0624588	0.0302242		261.8	0.276288	0.214606	0.133137	0.0850992	0.0610186
262	0.242968	0.171388	0.106684	0.0619791	0.0296321		262	0.27616	0.215006	0.133133	0.0848836	0.0610428
262.2	0.242554	0.171152	0.106481	0.0614681	0.0295415		262.2	0.276325	0.216234	0.133532	0.0850573	0.0614023
262.4	0.242506	0.17046	0.106297	0.0606154	0.0293838		262.4	0.276707	0.216351	0.133678	0.0847171	0.0612037
262.6	0.242831	0.170593	0.107179	0.0611	0.0296339		262.6	0.276422	0.216696	0.133545	0.0849646	0.0605542
262.8	0.243362	0.1711	0.107567	0.0612749	0.0299445		262.8	0.276346	0.216545	0.133363	0.0852605	0.0602149
263	0.243977	0.171202	0.10797	0.0615623	0.0299953		263	0.276551	0.216685	0.133214	0.08541	0.0597388
263.2	0.243185	0.170972	0.107728	0.061127	0.0291443		263.2	0.276591	0.217129	0.13374	0.0859522	0.060376
263.4	0.243639	0.170918	0.107983	0.0609898	0.0290077		263.4	0.276962	0.217454	0.133849	0.0862253	0.0601466
263.6	0.244051	0.171216	0.108238	0.0612406	0.0293007		263.6	0.276856	0.21722	0.13371	0.0866764	0.0599376
263.8	0.244558	0.171598	0.108889	0.0617833	0.0295499		263.8	0.277408	0.21739	0.133918	0.0872017	0.0601954
264	0.245219	0.171665	0.109118	0.0624589	0.0299628		264	0.277742	0.217239	0.133762	0.0869583	0.060249
264.2	0.245288	0.172284	0.109238	0.0634222	0.0303144		264.2	0.278016	0.217296	0.134175	0.0870949	0.0609475
264.4	0.246138	0.172715	0.109159	0.0633878	0.0303077		264.4	0.278531	0.217196	0.135089	0.0878656	0.0614613
264.6	0.246023	0.172529	0.109125	0.0631698	0.0298336		264.6	0.278866	0.216979	0.13586	0.0884402	0.06197
264.8	0.246366	0.172686	0.109067	0.063364	0.0302221		264.8	0.278894	0.217152	0.135712	0.0887895	0.0625099
265	0.246109	0.172687	0.109038	0.0633792	0.0299558		265	0.279075	0.21701	0.135842	0.0893881	0.0625832
265.2	0.246187	0.173111	0.109701	0.0641595	0.0302274		265.2	0.279381	0.216663	0.135824	0.0891286	0.0625625
265.4	0.246583	0.173812	0.10965	0.0645143	0.0302768		265.4	0.279316	0.216023	0.13554	0.0892263	0.0628495
265.6	0.24665	0.173424	0.10891	0.0643266	0.029907		265.6	0.279276	0.215505	0.135836	0.088716	0.0633312
265.8	0.246425	0.173539	0.10863	0.0636196	0.0296742		265.8	0.278935	0.214634	0.135443	0.0878554	0.0625988
266	0.246431	0.173323	0.108818	0.0630997	0.0297722		266	0.279337	0.214883	0.135492	0.0873407	0.0625777
266.2	0.246704	0.173697	0.108713	0.0623661	0.0300303		266.2	0.279641	0.215543	0.135732	0.0874033	0.0624169
266.4	0.246945	0.173761	0.10906	0.0621087	0.0304505		266.4	0.279423	0.215161	0.135292	0.0872029	0.0617231
266.6	0.246565	0.173955	0.109119	0.0618762	0.0302567		266.6	0.279042	0.214948	0.13486	0.0869305	0.0609659
266.8	0.246244	0.173419	0.108375	0.0610113	0.0299618		266.8	0.278414	0.214944	0.134521	0.0868146	0.0606719
267	0.245529	0.173138	0.108369	0.0606524	0.0301467		267	0.27803	0.215216	0.134539	0.086522	0.0603379
267.2	0.245033	0.172439	0.107774	0.0599961	0.0298463		267.2	0.277757	0.215405	0.133947	0.0865115	0.0604042
267.4	0.245862	0.172369	0.107477	0.0597374	0.0301412		267.4	0.277233	0.215201	0.13316	0.0859136	0.0594684
267.6	0.246131	0.173003	0.108052	0.0601933	0.0304104		267.6	0.276609	0.215089	0.132581	0.0859145	0.0587557
267.8	0.246913	0.173866	0.108707	0.0611673	0.0307454		267.8	0.276556	0.214927	0.132431	0.0858492	0.0585335
268	0.247557	0.174479	0.10912	0.0615014	0.0312684		268	0.27638	0.214663	0.132378	0.0854653	0.0578289
268.2	0.247682	0.174975	0.109142	0.0617178	0.0309011		268.2	0.276051	0.214606	0.132316	0.0854304	0.0575214
268.4	0.247998	0.174987	0.109103	0.0616113	0.0306544		268.4	0.276994	0.214576	0.13241	0.0857353	0.057423
268.6	0.248026	0.175035	0.109315	0.0623415	0.0305964		268.6	0.276984	0.214753	0.132474	0.0857955	0.0575483
268.8	0.248723	0.175733	0.109708	0.0628148	0.0313731		268.8	0.277106	0.215054	0.132515	0.0856718	0.0575339
269	0.249005	0.175741	0.110095	0.0631678	0.0315053		269	0.277475	0.215337	0.132927	0.0862272	0.0574556
269.2	0.249908	0.176253	0.110914	0.0636937	0.0318722		269.2	0.277849	0.215691	0.133324	0.0864072	0.0578077
269.4	0.250511	0.176604	0.111176	0.06385	0.0317486		269.4	0.277948	0.215499	0.133338	0.0861637	0.0581836
269.6	0.251226	0.176686	0.111439	0.0639631	0.0317615		269.6	0.278176	0.215975	0.133831	0.0862431	0.0585386
269.8	0.252135	0.177308	0.112643	0.0642074	0.0323535		269.8	0.278744	0.216372	0.134096	0.0859279	0.0588632
270	0.252648	0.177446	0.112878	0.0645352	0.0326147		270	0.27988	0.217445	0.135048	0.086499	0.0600473
270.2	0.252233	0.177767	0.11287	0.0643793	0.0328007		270.2	0.280173	0.218272	0.1357	0.0872081	0.0604729
270.4	0.251838	0.177736	0.113072	0.064277	0.0329155		270.4	0.280079	0.218527	0.136065	0.0872075	0.0610628
270.6	0.251065	0.177135	0.112675	0.0638675	0.0324655		270.6	0.279874	0.218454	0.135976	0.0868322	0.0613359
270.8	0.250352	0.176443	0.111973	0.0635944	0.0324226		270.8	0.279441	0.218703	0.135816	0.0865931	0.061575
271	0.250517	0.176198	0.11197	0.063893	0.0326852		271	0.279385	0.218997	0.135832	0.0866701	0.0618269
271.2	0.250623	0.175677	0.11144	0.0637913	0.0319992		271.2	0.279658	0.219001	0.135399	0.0868971	0.0620613
271.4	0.250694	0.176126	0.110907	0.0639419	0.0318857		271.4	0.279268	0.218609	0.135107	0.0869557	0.0612405
271.6	0.250611	0.176488	0.111341	0.063795	0.0318445		271.6	0.279095	0.218387	0.135383	0.0870752	0.0609186
271.8	0.25097	0.176818	0.111335	0.0640908	0.032058		271.8	0.279575	0.218493	0.135475	0.0873075	0.0611139
272	0.251076	0.177066	0.111433	0.0638254	0.0323361		272	0.279131	0.218236	0.134796	0.0868233	0.0609239
272.2	0.251063	0.176818	0.11132	0.0637385	0.0321108		272.2	0.279242	0.218165	0.134073	0.0865357	0.0606946
272.4	0.251138	0.177097	0.111538	0.0640735	0.0323189		272.4	0.279895	0.218291	0.134264	0.0864931	0.060706
272.6	0.25167	0.177458	0.111813	0.0643416	0.0330117		272.6	0.279863	0.218825	0.134392	0.0867696	0.0602419
272.8	0.251694	0.177622	0.111743	0.064029	0.033288		272.8	0.280258	0.21898	0.134788	0.0871378	0.0606295
273	0.252132	0.177605	0.112282	0.063904	0.0336139		273	0.280502	0.218948	0.13485	0.0874344	0.0607865
273.2	0.252969	0.178199	0.112746	0.064162	0.0340027		273.2	0.280646	0.218993	0.134888	0.0877469	0.0611013
273.4	0.25353	0.178504	0.112715	0.0648077	0.0341047		273.4	0.281084	0.219067	0.13499	0.0876911	0.0613982
273.6	0.254082	0.17886	0.113488	0.0651557	0.0344376		273.6	0.281346	0.219111	0.134873	0.0876125	0.061285
273.8	0.254428	0.179047	0.114023	0.0652579	0.0348973		273.8	0.281892	0.219147	0.135283	0.087737	0.0613711
274	0.254121	0.179307	0.113739	0.064956	0.0349274		274	0.282318	0.219215	0.135185	0.0881558	0.0614018
274.2	0.253556	0.179255	0.113515	0.0645891	0.034805		274.2	0.282022	0.219075	0.135061	0.0880424	0.0613498
274.4	0.253779	0.179006	0.113732	0.0645354	0.0342888		274.4	0.282167	0.219023	0.135121	0.0876474	0.061407
274.6	0.253296	0.177988	0.112802	0.0641234	0.0335847		274.6	0.282241	0.218619	0.13452	0.0871256	0.0609262
274.8	0.253473	0.177945	0.112971	0.0645401	0.0333799		274.8	0.282868	0.219139	0.134817	0.0873047	0.060854
275	0.254047	0.1781	0.113325	0.0648857	0.033352		275	0.282422	0.218645	0.134653	0.0867908	0.0605202
275.2	0.253386	0.177931	0.112894	0.0647363	0.0327757		275.2	0.282756	0.218521	0.134167	0.0868057	0.0602544
275.4	0.253151	0.177807	0.112519	0.0643448	0.0326063		275.4	0.28277	0.219067	0.134347	0.0868947	0.0607016
275.6	0.253491	0.177685	0.112762	0.0643359	0.0324381		275.6	0.283	0.219614	0.134829	0.087423	0.0612243
275.8	0.253466	0.177977	0.112917	0.064922	0.0324443		275.8	0.282962	0.219993	0.134976	0.0876548	0.0612128
276	0.253551	0.178064	0.113222	0.0648733	0.0328204		276	0.282547	0.220091	0.134697	0.087563	0.0610162
276.2	0.253952	0.178343	0.113378	0.0648822	0.0329445		276.2	0.282729	0.220167	0.134848	0.0876485	0.0605061
276.4	0.25389	0.178732	0.113408	0.0648283	0.033208		276.4	0.282656	0.220344	0.135404	0.0880909	0.0603088
276.6	0.253636	0.178599	0.113155	0.0646834	0.0335454		276.6	0.28262	0.220056	0.135943	0.0885963	0.0599963
276.8	0.25357	0.178405	0.113164	0.064559	0.0335198		276.8	0.282485	0.219966	0.136465	0.0885507	0.0607763
277	0.254101	0.178752	0.11365	0.0648392	0.0342135		277	0.282875	0.219927	0.136662	0.0888034	0.0608127
277.2	0.254108	0.178532	0.113211	0.0647586	0.0339261		277.2	0.282603	0.220105	0.136727	0.0888101	0.0606852
277.4	0.253579	0.17813	0.112532	0.0643639	0.0336381		277.4	0.282247	0.219468	0.136195	0.0879257	0.0597667
277.6	0.253284	0.177893	0.112401	0.0637026	0.0335385		277.6	0.281899	0.219452	0.135625	0.0879412	0.0591237
277.8	0.253883	0.178258	0.112481	0.0638565	0.0339142		277.8	0.28202	0.219542	0.136009	0.0884761	0.0593828
278	0.254406	0.178233	0.112316	0.0639271	0.0337957		278	0.282721	0.219953	0.136193	0.0886937	0.05973
278.2	0.25404	0.177687	0.111693	0.0640124	0.0328486		278.2	0.282683	0.219823	0.136275	0.0885082	0.0594856
278.4	0.254005	0.177327	0.111472	0.0636696	0.0322278		278.4	0.283098	0.220341	0.136402	0.0887303	0.0597655
278.6	0.254256	0.177336	0.111532	0.0637237	0.0324457		278.6	0.283513	0.220619	0.136721	0.0886969	0.0603469
278.8	0.254698	0.178113	0.112527	0.064661	0.032945		278.8	0.283864	0.221399	0.137487	0.0885265	0.0610583
279	0.254959	0.17837	0.112458	0.0649236	0.0327952		279	0.283425	0.220902	0.137235	0.0877491	0.0607934
279.2	0.254946	0.1784	0.112331	0.065517	0.0325165		279.2	0.284091	0.222241	0.137346	0.0881415	0.0615733
279.4	0.254651	0.178071	0.111899	0.0652222	0.0316208		279.4	0.28417	0.222327	0.137344	0.0873299	0.0621402
279.6	0.254523	0.178617	0.112228	0.0661255	0.0315807		279.6	0.284168	0.222293	0.13735	0.0870426	0.0622213
279.8	0.254286	0.17906	0.11268	0.0663236	0.0319613		279.8	0.284008	0.222568	0.137141	0.0866173	0.0619876
280	0.254221	0.179133	0.112763	0.0663394	0.032258		280	0.284188	0.222988	0.136723	0.0862452	0.0621264
280.2	0.253666	0.178862	0.112394	0.0658068	0.0318821		280.2	0.283998	0.22242	0.136413	0.0853966	0.0617553
280.4	0.253388	0.178612	0.112538	0.0655516	0.0319834		280.4	0.283588	0.222325	0.136134	0.0854282	0.0614185
280.6	0.252889	0.178077	0.112416	0.064946	0.0319377		280.6	0.283467	0.221722	0.135921	0.0850933	0.0613053
280.8	0.252983	0.177918	0.112509	0.0648399	0.0320497		280.8	0.283435	0.222394	0.135517	0.0854765	0.0615513
281	0.252316	0.178276	0.111885	0.0643179	0.0323705		281	0.284216	0.222358	0.135314	0.086027	0.0611812
281.2	0.252304	0.178562	0.111938	0.0646003	0.0322903		281.2	0.283636	0.222017	0.135153	0.0862755	0.0609372
281.4	0.251947	0.178741	0.111848	0.0646565	0.0322868		281.4	0.283427	0.221367	0.134815	0.0865066	0.0606513
281.6	0.252289	0.179179	0.111751	0.0652583	0.0325076		281.6	0.284114	0.221656	0.13511	0.0874645	0.0609078
281.8	0.253513	0.179707	0.112163	0.0660695	0.0329476		281.8	0.284363	0.221493	0.135461	0.087838	0.0613102
282	0.253984	0.179463	0.11221	0.0664419	0.0327442		282	0.284561	0.221751	0.136254	0.0885855	0.0615786
282.2	0.253881	0.178925	0.11184	0.066321	0.0319431		282.2	0.284068	0.221248	0.136676	0.0893113	0.0614749
282.4	0.254459	0.179745	0.11205	0.0663902	0.0321341		282.4	0.284607	0.22139	0.137308	0.0900486	0.0619277
282.6	0.255773	0.180202	0.113167	0.0675881	0.0328821		282.6	0.28474	0.221123	0.137964	0.0903496	0.0621684
282.8	0.256012	0.180096	0.113195	0.0683167	0.0327695		282.8	0.28483	0.221439	0.1386	0.0903129	0.0623725
283	0.256451	0.179954	0.113058	0.0685938	0.0321549		283	0.284335	0.221011	0.13841	0.090194	0.0618438
283.2	0.256272	0.179703	0.112937	0.0684802	0.0315242		283.2	0.284477	0.221012	0.138363	0.0899216	0.0622208
283.4	0.255745	0.17923	0.112236	0.0678122	0.0306532		283.4	0.28446	0.220548	0.138169	0.0887636	0.062358
283.6	0.255637	0.179617	0.112475	0.0676339	0.0309539		283.6	0.284123	0.220452	0.137677	0.0882093	0.0626057
283.8	0.256043	0.179573	0.1126	0.0673738	0.0315999		283.8	0.284204	0.220424	0.13756	0.0880307	0.0626077
284	0.255657	0.179328	0.112216	0.0667091	0.0311614		284	0.284167	0.219997	0.136862	0.0871159	0.062399
284.2	0.255333	0.179017	0.11195	0.0657326	0.0309995		284.2	0.283743	0.219729	0.136197	0.0864971	0.0620016
284.4	0.254988	0.179289	0.111921	0.0649259	0.0308345		284.4	0.283567	0.219767	0.135462	0.0864372	0.0617534
284.6	0.254429	0.179434	0.111765	0.063945	0.0306584		284.6	0.283856	0.219658	0.13486	0.0859017	0.061427
284.8	0.254472	0.180008	0.111966	0.0641245	0.0308073		284.8	0.283909	0.219978	0.13429	0.08568	0.0611832
285	0.254111	0.180488	0.111698	0.0636572	0.0311948		285	0.284274	0.219754	0.134316	0.0855664	0.0610909
285.2	0.254334	0.180601	0.112295	0.0640108	0.0310766		285.2	0.283998	0.219833	0.134266	0.0852576	0.0610255
285.4	0.254436	0.180774	0.112328	0.0635226	0.0310345		285.4	0.284264	0.219858	0.134034	0.0848703	0.0608306
285.6	0.25498	0.181058	0.112498	0.0635227	0.0314283		285.6	0.284767	0.219867	0.134298	0.0848953	0.0607118
285.8	0.255682	0.180691	0.112844	0.0636575	0.0317069		285.8	0.284875	0.220652	0.135246	0.0853037	0.0610697
286	0.255532	0.180254	0.112899	0.0632864	0.0311572		286	0.285635	0.221351	0.136316	0.0862793	0.0613139
286.2	0.256018	0.180617	0.11291	0.0633911	0.0312249		286.2	0.286376	0.221538	0.136946	0.0872568	0.0616198
286.4	0.256516	0.181767	0.113684	0.0642606	0.0321632		286.4	0.286978	0.222088	0.137281	0.0879692	0.0613292
286.6	0.257272	0.181417	0.114532	0.0648986	0.0325376		286.6	0.287428	0.222447	0.137921	0.0886658	0.0617349
286.8	0.256702	0.181354	0.114189	0.0649691	0.032007		286.8	0.287836	0.22337	0.138563	0.08909	0.0622362
287	0.256621	0.180859	0.1145	0.0646025	0.0314993		287	0.287639	0.223521	0.138098	0.089605	0.0620537
287.2	0.256599	0.181092	0.114504	0.0645375	0.0312249		287.2	0.288125	0.22352	0.138645	0.0900774	0.0626941
287.4	0.257016	0.181086	0.114253	0.0650345	0.031741		287.4	0.28808	0.224038	0.138827	0.0905182	0.0629845
287.6	0.257134	0.181163	0.114722	0.0652957	0.0323643		287.6	0.288145	0.224115	0.138676	0.0908984	0.063161
287.8	0.25741	0.180801	0.114702	0.06565	0.0329194		287.8	0.288394	0.224369	0.138729	0.0915843	0.0634368
288	0.256821	0.180262	0.114213	0.0653119	0.0321263		288	0.28853	0.224408	0.138365	0.091539	0.063179
288.2	0.25703	0.180473	0.113935	0.0658037	0.0323376		288.2	0.288635	0.224576	0.138408	0.0914797	0.0633164
288.4	0.257323	0.181039	0.113882	0.0662415	0.0322663		288.4	0.288493	0.224069	0.137489	0.0908642	0.0627677
288.6	0.257638	0.181298	0.114175	0.066447	0.03236		288.6	0.287657	0.223615	0.136802	0.0898504	0.0617713
288.8	0.257705	0.180984	0.113834	0.0664104	0.0325982		288.8	0.287389	0.223528	0.136605	0.0895651	0.0615603
289	0.257441	0.180374	0.113648	0.0660189	0.0323255		289	0.287269	0.223813	0.136929	0.0892951	0.0612739
289.2	0.257591	0.180079	0.113752	0.0657928	0.0319308		289.2	0.287561	0.223895	0.136911	0.0891419	0.0611779
289.4	0.258303	0.180476	0.114095	0.0657432	0.0318677		289.4	0.287778	0.22362	0.136842	0.0890078	0.0612294
289.6	0.258262	0.18083	0.114285	0.0658108	0.0319872		289.6	0.287972	0.2236	0.137427	0.0891891	0.0612046
289.8	0.258888	0.181048	0.114548	0.0657549	0.0322012		289.8	0.288204	0.224063	0.138193	0.0891187	0.0614282
290	0.259199	0.181475	0.114792	0.0655344	0.0321395		290	0.288794	0.22475	0.138679	0.0897386	0.0621638
290.2	0.260141	0.182526	0.115248	0.0663248	0.0331763		290.2	0.289082	0.225475	0.139381	0.0905991	0.0631258
290.4	0.259531	0.182558	0.115096	0.0658434	0.0328063		290.4	0.288585	0.226001	0.139363	0.0908265	0.0632794
290.6	0.259909	0.182634	0.115598	0.0660375	0.0327543		290.6	0.289075	0.226133	0.139585	0.0909872	0.0639486
290.8	0.259173	0.18284	0.115323	0.0656996	0.0325522		290.8	0.288517	0.226074	0.139319	0.0913132	0.0639277
291	0.259621	0.183534	0.116157	0.0656592	0.0333794		291	0.288757	0.226274	0.139606	0.09122	0.0642334
291.2	0.259672	0.183927	0.11648	0.0658486	0.0337667		291.2	0.289029	0.226106	0.140115	0.0916735	0.0644901
291.4	0.260138	0.183192	0.116089	0.065782	0.0343455		291.4	0.289187	0.226374	0.140679	0.0923836	0.0649324
291.6	0.259981	0.183232	0.116161	0.0657529	0.0347417		291.6	0.289529	0.226534	0.140412	0.09266	0.0649955
291.8	0.260141	0.182865	0.115947	0.0660705	0.0349325		291.8	0.289821	0.226089	0.140242	0.0928182	0.0651093
292	0.260138	0.182273	0.115392	0.0659275	0.0344494		292	0.28988	0.225354	0.140077	0.0925568	0.0645624
292.2	0.260492	0.182392	0.115533	0.0664915	0.0348669		292.2	0.289746	0.225114	0.140042	0.0925922	0.0639763
292.4	0.260684	0.182018	0.115255	0.0662441	0.0344725		292.4	0.28896	0.224748	0.139473	0.0919199	0.0630083
292.6	0.260526	0.181584	0.115392	0.0661991	0.0341257		292.6	0.288768	0.225125	0.139689	0.0918823	0.0626725
292.8	0.260201	0.181052	0.11498	0.0658959	0.0337071		292.8	0.288852	0.225228	0.139727	0.0915905	0.0622473
293	0.260593	0.181323	0.115459	0.0661404	0.0332988		293	0.288731	0.224907	0.139405	0.0909654	0.0615741
293.2	0.261021	0.181491	0.115626	0.0660875	0.0327522		293.2	0.289148	0.224819	0.139349	0.0909989	0.0614019
293.4	0.261304	0.182027	0.116	0.0664818	0.0324451		293.4	0.289255	0.224607	0.139347	0.0906254	0.0612154
293.6	0.261237	0.182465	0.116233	0.0666016	0.0325325		293.6	0.289202	0.224631	0.139496	0.0903976	0.0610357
293.8	0.262134	0.182689	0.116443	0.0667758	0.032846		293.8	0.289662	0.225151	0.139683	0.0905691	0.0613894
294	0.262163	0.182439	0.115887	0.066696	0.0324736		294	0.289777	0.225784	0.139716	0.090712	0.0619776
294.2	0.261866	0.18282	0.115673	0.0669205	0.0325284		294.2	0.289351	0.226244	0.139737	0.0908482	0.0622493
294.4	0.261735	0.182795	0.115589	0.066959	0.0323664		294.4	0.289316	0.226169	0.139269	0.0906074	0.0622592
294.6	0.262396	0.183798	0.11634	0.0677519	0.0330218		294.6	0.289935	0.226756	0.139456	0.0906654	0.063205
294.8	0.261689	0.183899	0.115869	0.0671899	0.0328424		294.8	0.289983	0.226829	0.139782	0.0909276	0.0637123
295	0.261539	0.183849	0.116222	0.0670521	0.0329504		295	0.290835	0.227766	0.140467	0.0910395	0.0644088
295.2	0.261225	0.183641	0.116182	0.0670292	0.0326834		295.2	0.290972	0.227676	0.140357	0.0914236	0.0647096
295.4	0.260958	0.18374	0.115619	0.0668292	0.0327359		295.4	0.291502	0.227447	0.14049	0.0916092	0.0650408
295.6	0.260982	0.184392	0.115919	0.0671698	0.0330862		295.6	0.291768	0.227162	0.140171	0.091672	0.0648596
295.8	0.260704	0.184511	0.115794	0.0670176	0.0333053		295.8	0.292455	0.226909	0.140704	0.0918753	0.0651662
296	0.260889	0.184512	0.115583	0.0670638	0.0333884		296	0.292183	0.227059	0.140628	0.0916509	0.0651392
296.2	0.260834	0.184853	0.115666	0.067047	0.0337201		296.2	0.291612	0.22718	0.140468	0.0907377	0.0648523
296.4	0.26072	0.185169	0.115397	0.0668843	0.0335006		296.4	0.291338	0.22704	0.140584	0.0900137	0.0648512
296.6	0.260865	0.185491	0.115938	0.0671376	0.0337965		296.6	0.291025	0.227094	0.140441	0.0892798	0.0643892
296.8	0.26052	0.186056	0.115886	0.0670074	0.0338376		296.8	0.29096	0.226837	0.140753	0.0890308	0.0643444
297	0.260663	0.186333	0.11622	0.0676302	0.0341412		297	0.29128	0.226537	0.140832	0.0892153	0.0642217
297.2	0.260481	0.186472	0.116371	0.0680892	0.0337101		297.2	0.291703	0.226953	0.141472	0.0896477	0.0643501
297.4	0.260499	0.186271	0.116483	0.0680098	0.0336961		297.4	0.291875	0.226922	0.141508	0.0896027	0.0643683
297.6	0.260763	0.186208	0.116728	0.0680744	0.0339691		297.6	0.291697	0.226919	0.141046	0.0897702	0.0643728
297.8	0.261855	0.186133	0.116825	0.0683801	0.0342554		297.8	0.292052	0.227535	0.141255	0.0906579	0.0642314
298	0.262649	0.18623	0.117106	0.0688403	0.0343066		298	0.291744	0.227934	0.141709	0.0906031	0.0641891
298.2	0.263036	0.186484	0.117407	0.069489	0.0347306		298.2	0.291726	0.228015	0.141632	0.0907438	0.064455
298.4	0.263937	0.186307	0.117585	0.0696089	0.034602		298.4	0.292364	0.228541	0.142172	0.0915933	0.0648375
298.6	0.264234	0.186604	0.117933	0.0697888	0.0344522		298.6	0.292239	0.229138	0.14213	0.0920778	0.0650313
298.8	0.2643	0.186135	0.117901	0.0699084	0.0342554		298.8	0.292887	0.22924	0.142216	0.0928653	0.0650724
299	0.264249	0.186253	0.118292	0.0702187	0.0344072		299	0.293214	0.229711	0.142323	0.0935281	0.0651849
299.2	0.264614	0.186547	0.118303	0.0700688	0.0342861		299.2	0.293168	0.229147	0.141645	0.0931958	0.0647003
299.4	0.264533	0.186762	0.11853	0.0694872	0.0344013		299.4	0.293648	0.228709	0.141171	0.0929217	0.0640923
299.6	0.265302	0.187023	0.118841	0.0695762	0.0350281		299.6	0.293507	0.228285	0.140891	0.0925678	0.0638321
299.8	0.264635	0.186944	0.118181	0.0685647	0.0348807		299.8	0.293606	0.227874	0.140524	0.0925487	0.0635783
300	0.26493	0.186902	0.118212	0.0686154	0.0349765		300	0.293073	0.227582	0.139965	0.0920034	0.0631567
300.2	0.263973	0.186295	0.11786	0.0677077	0.0345209		300.2	0.292451	0.226964	0.139821	0.0916597	0.062595
300.4	0.263506	0.186493	0.118002	0.0672451	0.0346348		300.4	0.292265	0.226244	0.140042	0.0915563	0.0627902
300.6	0.263421	0.186604	0.118271	0.0668615	0.0347434		300.6	0.292424	0.226478	0.140422	0.0916647	0.0628844
300.8	0.262929	0.187056	0.117964	0.0667263	0.0345358		300.8	0.293144	0.226644	0.141062	0.0923802	0.0631566
301	0.26235	0.186437	0.117776	0.0666224	0.0338958		301	0.293117	0.226707	0.141043	0.0923485	0.0627371
301.2	0.262715	0.186653	0.117911	0.0663774	0.0338931		301.2	0.293281	0.227006	0.141246	0.0922319	0.0628699
301.4	0.262848	0.185668	0.117182	0.0655256	0.0334216		301.4	0.293152	0.227198	0.141103	0.0917883	0.0627414
301.6	0.263093	0.185592	0.117283	0.0656872	0.0336106		301.6	0.293458	0.227764	0.141408	0.0923302	0.0628135
301.8	0.263953	0.186067	0.117639	0.0664547	0.0343702		301.8	0.294029	0.228305	0.142362	0.0927778	0.0626594
302	0.264202	0.186458	0.117675	0.066755	0.0346196		302	0.29456	0.228811	0.142913	0.092351	0.0628364
302.2	0.263975	0.186167	0.116938	0.0664751	0.0346669		302.2	0.29499	0.228879	0.142505	0.0916897	0.0628505
302.4	0.264175	0.18616	0.116549	0.0667377	0.0344494		302.4	0.295575	0.229832	0.142929	0.0921087	0.0632658
302.6	0.264714	0.186741	0.116706	0.0674762	0.0346778		302.6	0.295801	0.230109	0.142583	0.0923631	0.0635932
302.8	0.265222	0.187004	0.116682	0.0679656	0.0350075		302.8	0.296755	0.230501	0.142423	0.0928448	0.0642132
303	0.265252	0.186962	0.116702	0.0678074	0.0351161		303	0.296528	0.230876	0.142428	0.0925929	0.0640181
303.2	0.26569	0.187046	0.11681	0.0678298	0.0351858		303.2	0.296554	0.230695	0.142157	0.0919924	0.0634816
303.4	0.266375	0.187542	0.117248	0.0683406	0.0359171		303.4	0.296429	0.230583	0.142186	0.0919561	0.0636721
303.6	0.266889	0.18778	0.117204	0.0689593	0.0363075		303.6	0.295926	0.229703	0.14166	0.0918946	0.063214
303.8	0.267294	0.187927	0.117588	0.0690978	0.0364107		303.8	0.295863	0.229638	0.141391	0.0923824	0.0630916
304	0.268271	0.188079	0.118394	0.0697005	0.0366243		304	0.295712	0.229425	0.141392	0.0925077	0.0632733
304.2	0.268126	0.187967	0.118649	0.0697252	0.0364201		304.2	0.295265	0.228997	0.141445	0.0925192	0.0633225
304.4	0.268602	0.188789	0.119275	0.0701217	0.0368786		304.4	0.295169	0.228589	0.141319	0.0925388	0.0634499
304.6	0.268645	0.188699	0.119183	0.0700274	0.0364942		304.6	0.295466	0.22871	0.141565	0.0928762	0.0632643
304.8	0.268693	0.188388	0.119063	0.0699724	0.0357616		304.8	0.295491	0.228491	0.141528	0.0928338	0.0629782
305	0.268061	0.187417	0.118683	0.0695192	0.0348973		305	0.295362	0.228283	0.141341	0.09264	0.0629665
305.2	0.268411	0.187862	0.118503	0.069643	0.0352305		305.2	0.295847	0.228562	0.141438	0.092596	0.0629869
305.4	0.267582	0.187513	0.117973	0.0691206	0.0345338		305.4	0.296008	0.228597	0.141681	0.0926101	0.0626952
305.6	0.267206	0.187794	0.118352	0.0694635	0.0348942		305.6	0.296518	0.228851	0.142023	0.0930274	0.0627956
305.8	0.266474	0.187777	0.117528	0.0696498	0.03434		305.8	0.296617	0.22889	0.142219	0.0926843	0.0628109
306	0.265732	0.187144	0.116588	0.0688895	0.0334489		306	0.297135	0.229509	0.142132	0.0924134	0.0631383
306.2	0.265456	0.186596	0.1157	0.0687899	0.0331798		306.2	0.297857	0.229589	0.141859	0.0918269	0.063371
306.4	0.265279	0.186656	0.115605	0.0691093	0.0330058		306.4	0.298244	0.229642	0.142417	0.0922294	0.0639273
306.6	0.26571	0.18707	0.116149	0.0691939	0.0329965		306.6	0.298526	0.229922	0.14251	0.0922095	0.0641481
306.8	0.265713	0.187221	0.116285	0.0690046	0.0332384		306.8	0.298747	0.230142	0.142121	0.0918066	0.0638347
307	0.266002	0.18776	0.11688	0.0691765	0.0335726		307	0.299225	0.230896	0.14286	0.0918952	0.0642396
307.2	0.266383	0.188423	0.116978	0.0697125	0.034195		307.2	0.299411	0.230764	0.143106	0.0917049	0.0642369
307.4	0.266969	0.188843	0.117549	0.0702725	0.0346342		307.4	0.299393	0.230439	0.142683	0.0916234	0.0644263
307.6	0.267358	0.189123	0.118178	0.0704331	0.0349244		307.6	0.299502	0.230434	0.142457	0.0918619	0.0644483
307.8	0.268531	0.189263	0.119299	0.0707146	0.0355405		307.8	0.299945	0.231164	0.143031	0.0924438	0.0652564
308	0.268796	0.189334	0.119606	0.0703514	0.0358517		308	0.299653	0.230738	0.14311	0.0925564	0.0648737
308.2	0.26863	0.189807	0.119572	0.0700205	0.0359077		308.2	0.299618	0.231057	0.14312	0.0928116	0.064829
308.4	0.269019	0.190171	0.119724	0.0699438	0.0361756		308.4	0.299718	0.231086	0.143507	0.0933295	0.0652126
308.6	0.268272	0.189712	0.119111	0.0691706	0.035513		308.6	0.300221	0.231663	0.144227	0.0937351	0.0656423
308.8	0.268389	0.189673	0.119041	0.0688002	0.0353352		308.8	0.300035	0.231425	0.144129	0.0939698	0.0652195
309	0.268098	0.190016	0.11926	0.0691368	0.0356747		309	0.300098	0.231288	0.144254	0.0941822	0.0652252
309.2	0.268129	0.190605	0.119847	0.0695889	0.0360252		309.2	0.300209	0.231668	0.144686	0.0945994	0.0651015
309.4	0.267859	0.190615	0.119395	0.0690314	0.0355921		309.4	0.300117	0.231642	0.144965	0.0946196	0.0651073
309.6	0.2676	0.190182	0.119002	0.0692714	0.0353661		309.6	0.300366	0.231682	0.145024	0.0945174	0.0653483
309.8	0.267698	0.190229	0.118624	0.0691924	0.0347789		309.8	0.300411	0.232343	0.145261	0.0947942	0.0655608
310	0.268269	0.189938	0.11897	0.0693582	0.0352597		310	0.30094	0.232698	0.145221	0.0947425	0.0657687
310.2	0.268773	0.19005	0.118998	0.0698506	0.0355465		310.2	0.301179	0.232407	0.145035	0.0942526	0.0654373
310.4	0.26909	0.18999	0.119408	0.0695097	0.0354328		310.4	0.300772	0.232297	0.14531	0.0943892	0.0656753
310.6	0.269517	0.190167	0.119184	0.0695714	0.035162		310.6	0.300739	0.232256	0.144588	0.0938467	0.0654653
310.8	0.269698	0.190375	0.119364	0.0696638	0.0352054		310.8	0.301097	0.232208	0.144126	0.093767	0.0653784
311	0.270135	0.190789	0.119937	0.0702617	0.035394		311	0.301452	0.232168	0.144227	0.0941618	0.0657301
311.2	0.270179	0.190423	0.119322	0.070485	0.0349651		311.2	0.300999	0.231338	0.143479	0.0935366	0.0654156
311.4	0.270205	0.190298	0.119601	0.0707076	0.034686		311.4	0.300587	0.231347	0.143731	0.0936319	0.065725
311.6	0.270114	0.189737	0.119374	0.0705501	0.0344388		311.6	0.300372	0.231747	0.143845	0.0938522	0.066024
311.8	0.270575	0.189886	0.119717	0.0709941	0.0348498		311.8	0.300182	0.231584	0.143834	0.0939878	0.0662006
312	0.270267	0.189501	0.119701	0.070595	0.0343629		312	0.299355	0.230998	0.14331	0.0939652	0.0656319
312.2	0.270164	0.190072	0.11952	0.0709741	0.0343313		312.2	0.299183	0.231393	0.143225	0.0940059	0.0661776
312.4	0.269784	0.189546	0.119245	0.0711423	0.0342859		312.4	0.299219	0.231295	0.143496	0.0944022	0.066414
312.6	0.269396	0.189749	0.119383	0.0709901	0.0340607		312.6	0.299007	0.231343	0.143519	0.0944342	0.0664644
312.8	0.269858	0.190187	0.120116	0.0713369	0.0346299		312.8	0.298999	0.230986	0.14335	0.0943361	0.0661015
313	0.269568	0.190406	0.120717	0.0716618	0.034861		313	0.298996	0.231411	0.143987	0.0945904	0.0663139
313.2	0.269135	0.190323	0.120846	0.0712811	0.0346111		313.2	0.298997	0.231661	0.144606	0.0945626	0.0660877
313.4	0.269264	0.190691	0.1208	0.0712227	0.0347136		313.4	0.299452	0.232507	0.145693	0.0950868	0.0666953
313.6	0.269223	0.190969	0.120963	0.0711022	0.0350292		313.6	0.299972	0.233255	0.146029	0.0956431	0.0670818
313.8	0.269416	0.191459	0.121413	0.0710998	0.035587		313.8	0.30039	0.234341	0.146599	0.0960095	0.0674425
314	0.269676	0.191664	0.121844	0.0713919	0.036356		314	0.30073	0.234593	0.146786	0.0956985	0.0673457
314.2	0.269818	0.192043	0.121493	0.0711632	0.0362237		314.2	0.300872	0.234697	0.146752	0.0953728	0.0671598
314.4	0.270706	0.192421	0.121781	0.0711346	0.036534		314.4	0.301106	0.234441	0.146823	0.0955135	0.0674131
314.6	0.270879	0.192574	0.121472	0.0712833	0.0365157		314.6	0.30176	0.234228	0.146556	0.0954162	0.0668855
314.8	0.270931	0.192291	0.121404	0.0709486	0.0366581		314.8	0.302056	0.234065	0.146404	0.0952331	0.0668744
315	0.271165	0.192102	0.121116	0.0707979	0.0365039		315	0.30217	0.234154	0.146522	0.0951131	0.0668235
315.2	0.271211	0.191588	0.120323	0.0707968	0.0360446		315.2	0.301973	0.234139	0.146194	0.0945042	0.0664563
315.4	0.27083	0.191759	0.120491	0.0707678	0.0362472		315.4	0.301846	0.234315	0.146096	0.0943683	0.066413
315.6	0.270673	0.191221	0.120427	0.0708537	0.0360103		315.6	0.302535	0.234377	0.145631	0.0947165	0.0661976
315.8	0.271027	0.191333	0.120426	0.0710461	0.0363905		315.8	0.301902	0.233543	0.144877	0.0941511	0.0656064
316	0.271289	0.191158	0.120542	0.0707424	0.0360692		316	0.301371	0.233323	0.144588	0.0939511	0.0652299
316.2	0.271566	0.191586	0.120254	0.0704918	0.0361333		316.2	0.301236	0.233227	0.144087	0.0936111	0.0648273
316.4	0.27136	0.19112	0.120106	0.0694348	0.035685		316.4	0.301691	0.232829	0.14389	0.0935471	0.0644938
316.6	0.271925	0.191192	0.120553	0.0692167	0.0354985		316.6	0.30127	0.232745	0.143697	0.0928751	0.0642
316.8	0.27188	0.191277	0.12084	0.0690258	0.0354556		316.8	0.301835	0.232986	0.143977	0.0932771	0.0642398
317	0.27187	0.191054	0.120842	0.0683362	0.0352237		317	0.301501	0.232928	0.144086	0.0937367	0.0640207
317.2	0.271984	0.191478	0.121347	0.0686084	0.0351631		317.2	0.301241	0.232959	0.144366	0.0938273	0.0642762
317.4	0.27288	0.192171	0.121865	0.0695378	0.0356532		317.4	0.301154	0.233192	0.144834	0.0942666	0.064904
317.6	0.273283	0.192545	0.122207	0.069704	0.0360316		317.6	0.301297	0.233088	0.144512	0.0939998	0.0650282
317.8	0.273276	0.192881	0.122421	0.0699378	0.0360316		317.8	0.301301	0.23301	0.14436	0.0938143	0.0648378
318	0.273562	0.19333	0.122569	0.0704256	0.0362699		318	0.3012	0.232917	0.144254	0.093366	0.0649108
318.2	0.273615	0.19339	0.122263	0.0706526	0.0358345		318.2	0.302086	0.233321	0.144801	0.0939412	0.065077
318.4	0.27395	0.193421	0.121976	0.0707153	0.0354901		318.4	0.302481	0.233117	0.144988	0.0942585	0.065223
318.6	0.273987	0.193128	0.121455	0.0706834	0.0353362		318.6	0.303089	0.233773	0.145015	0.0942786	0.0650002
318.8	0.273904	0.192445	0.120847	0.0705688	0.0353454		318.8	0.303273	0.234011	0.144898	0.0943976	0.0652259
319	0.273926	0.19238	0.120428	0.0707036	0.0352405		319	0.303691	0.234403	0.144911	0.094333	0.0652885
319.2	0.27406	0.192242	0.120129	0.0709917	0.035354		319.2	0.303717	0.234448	0.144767	0.0939862	0.0646434
319.4	0.27411	0.192461	0.120492	0.0714276	0.0353981		319.4	0.304453	0.234232	0.144916	0.0942265	0.0645431
319.6	0.274105	0.192049	0.120192	0.0715923	0.0352915		319.6	0.304438	0.234289	0.144788	0.0941383	0.0643955
319.8	0.274102	0.19197	0.120051	0.0711807	0.0356633		319.8	0.303926	0.233944	0.144423	0.093174	0.0638282
320	0.274008	0.1917	0.119909	0.0706682	0.0354916		320	0.303716	0.234422	0.144603	0.0929817	0.0638818
320.2	0.273694	0.191631	0.119895	0.0706832	0.035365		320.2	0.303933	0.234749	0.144481	0.0928353	0.0640151
320.4	0.273614	0.191687	0.119848	0.0707574	0.0352521		320.4	0.304068	0.234913	0.144531	0.0923092	0.0643746
320.6	0.273851	0.191823	0.120391	0.0714692	0.0354245		320.6	0.304083	0.235338	0.144389	0.0921341	0.0646041
320.8	0.273674	0.192429	0.120636	0.0713175	0.0353195		320.8	0.304691	0.235681	0.144794	0.0927095	0.0654211
321	0.273729	0.192037	0.120192	0.0713616	0.0352397		321	0.304231	0.235522	0.144752	0.0924831	0.0654695
321.2	0.2738	0.192705	0.12062	0.0721302	0.0355285		321.2	0.303141	0.234929	0.144255	0.0917251	0.0652662
321.4	0.274307	0.192905	0.120577	0.0725961	0.0359049		321.4	0.302889	0.235165	0.144331	0.0920026	0.0656778
321.6	0.27458	0.193265	0.121189	0.0730628	0.0362571		321.6	0.303246	0.234886	0.144147	0.0919479	0.0656026
321.8	0.274478	0.193384	0.121085	0.0726789	0.0360494		321.8	0.302825	0.235023	0.144239	0.0924437	0.0655984
322	0.273887	0.192747	0.120653	0.0725642	0.035475		322	0.30318	0.235323	0.145011	0.0930299	0.0662115
322.2	0.27358	0.19246	0.120504	0.0724866	0.0350166		322.2	0.303517	0.23572	0.145115	0.0935001	0.0662808
322.4	0.273812	0.192492	0.120243	0.071795	0.034616		322.4	0.303327	0.235507	0.144893	0.0936348	0.0662998
322.6	0.273999	0.19216	0.120345	0.0718004	0.0347195		322.6	0.303702	0.235649	0.144635	0.0937091	0.0659541
322.8	0.273786	0.191756	0.120258	0.0718427	0.0346575		322.8	0.303793	0.235597	0.144889	0.0942529	0.0659675
323	0.274059	0.192237	0.120509	0.0717065	0.0346294		323	0.304151	0.235741	0.144994	0.0942713	0.0659243
323.2	0.274714	0.192592	0.121267	0.0720669	0.035062		323.2	0.304551	0.236191	0.145441	0.0949934	0.0656832
323.4	0.274378	0.192638	0.1216	0.0720412	0.0348288		323.4	0.30523	0.235801	0.145987	0.0958504	0.0659085
323.6	0.274259	0.192827	0.121165	0.0714888	0.0349099		323.6	0.305265	0.236167	0.146059	0.096065	0.0663689
323.8	0.27393	0.193153	0.121165	0.0711571	0.0353426		323.8	0.305942	0.236069	0.146618	0.0964255	0.0664689
324	0.27426	0.193589	0.12138	0.0714343	0.0353819		324	0.306201	0.23626	0.147072	0.0966326	0.0671078
324.2	0.274798	0.194385	0.122109	0.0720435	0.0357423		324.2	0.307263	0.236826	0.147632	0.0972248	0.0676833
324.4	0.275426	0.194914	0.122082	0.0720299	0.0357074		324.4	0.307319	0.236438	0.147685	0.0964561	0.0675379
324.6	0.275661	0.195342	0.122278	0.0718979	0.0357154		324.6	0.307719	0.236364	0.147187	0.0964061	0.0673761
324.8	0.276241	0.195682	0.121821	0.0718181	0.0357308		324.8	0.307904	0.236201	0.147284	0.0963126	0.0674205
325	0.276486	0.195848	0.121987	0.0723802	0.0360103		325	0.307477	0.235979	0.146996	0.0957283	0.0666975
325.2	0.276303	0.196459	0.122507	0.072662	0.0363839		325.2	0.30711	0.23602	0.146607	0.0952559	0.0661584
325.4	0.276798	0.19661	0.122653	0.0730424	0.0365608		325.4	0.307313	0.236527	0.147365	0.0956393	0.0664958
325.6	0.277334	0.196635	0.123146	0.0737129	0.0370012		325.6	0.30714	0.235846	0.147334	0.0949032	0.0660126
325.8	0.27721	0.195945	0.123011	0.0729349	0.0365759		325.8	0.306612	0.236024	0.147388	0.0949216	0.0662349
326	0.276272	0.195013	0.122579	0.0726943	0.0362804		326	0.306668	0.236254	0.147332	0.0946923	0.0663688
326.2	0.27619	0.194905	0.122654	0.0729759	0.0367082		326.2	0.306674	0.236723	0.147285	0.0942266	0.066557
326.4	0.275403	0.194617	0.122403	0.0722348	0.0361001		326.4	0.30652	0.236505	0.147099	0.0940742	0.0661633
326.6	0.27459	0.194071	0.122311	0.07251	0.0358311		326.6	0.306421	0.236596	0.146619	0.0935676	0.0661372
326.8	0.274031	0.194102	0.12244	0.0723977	0.0359474		326.8	0.305991	0.236411	0.146269	0.0932706	0.0658682
327	0.273885	0.194108	0.12272	0.0719103	0.0361784		327	0.306079	0.236732	0.146033	0.0932765	0.0657945
327.2	0.27375	0.193775	0.122298	0.0719385	0.0357662		327.2	0.30644	0.236943	0.14615	0.0940173	0.0661171
327.4	0.272811	0.193175	0.121709	0.0713065	0.035213		327.4	0.306761	0.23674	0.14661	0.0942296	0.0665034
327.6	0.272782	0.192794	0.121195	0.0710128	0.0351797		327.6	0.306945	0.237126	0.146897	0.0948184	0.0669063
327.8	0.273168	0.19249	0.121334	0.0708838	0.0353334		327.8	0.307262	0.236831	0.147052	0.0949266	0.0669143
328	0.274201	0.192266	0.121661	0.0710166	0.0355128		328	0.307579	0.236875	0.146781	0.0948676	0.0670527
328.2	0.275067	0.192357	0.121599	0.0708036	0.0356282		328.2	0.307966	0.237356	0.146979	0.0955083	0.0674316
328.4	0.275804	0.192454	0.121245	0.0708736	0.0354782		328.4	0.30755	0.236837	0.146536	0.0951363	0.0671185
328.6	0.276036	0.192685	0.120859	0.070637	0.0348786		328.6	0.307833	0.236534	0.146082	0.0956715	0.0667452
328.8	0.276877	0.193032	0.120955	0.0711311	0.0350343		328.8	0.308171	0.23709	0.146456	0.0962008	0.0669244
329	0.277121	0.193251	0.121647	0.0716693	0.035218		329	0.308426	0.237462	0.146877	0.0964503	0.0672042
329.2	0.277583	0.193581	0.121508	0.0718352	0.0352447		329.2	0.308586	0.237566	0.147056	0.0964726	0.0671713
329.4	0.278151	0.193913	0.121716	0.0717978	0.0355514		329.4	0.308672	0.237616	0.147577	0.0967358	0.0674782
329.6	0.278864	0.194522	0.122132	0.0718319	0.0360783		329.6	0.309133	0.23762	0.147752	0.0969219	0.0675184
329.8	0.279368	0.19488	0.122539	0.0714003	0.0364588		329.8	0.309609	0.238245	0.147738	0.0969292	0.0675396
330	0.278755	0.194953	0.122519	0.0709887	0.0368563		330	0.310083	0.238756	0.14805	0.0969564	0.0676071
330.2	0.279143	0.195821	0.122717	0.0711925	0.0369682		330.2	0.310575	0.238796	0.148246	0.0966954	0.0679099
330.4	0.278375	0.195821	0.123019	0.0706144	0.0363298		330.4	0.310085	0.238591	0.147453	0.0961685	0.0675898
330.6	0.27849	0.195883	0.123475	0.0706993	0.0363529		330.6	0.310047	0.238956	0.147273	0.0957607	0.0677663
330.8	0.278831	0.195956	0.12375	0.0704427	0.0366834		330.8	0.310044	0.239382	0.147455	0.0960163	0.0675959
331	0.279	0.196056	0.123743	0.0705203	0.0365826		331	0.310075	0.240107	0.14716	0.0960083	0.0675802
331.2	0.279185	0.195851	0.123535	0.0706307	0.0364138		331.2	0.309994	0.240388	0.147853	0.0961545	0.0676021
331.4	0.278964	0.195331	0.123627	0.0703792	0.0367468		331.4	0.310015	0.240631	0.148372	0.096446	0.0678914
331.6	0.278865	0.195164	0.123386	0.0707998	0.0368094		331.6	0.309903	0.240844	0.148795	0.0967904	0.0682453
331.8	0.279437	0.195909	0.123503	0.071062	0.0370719		331.8	0.309995	0.240797	0.148644	0.0966396	0.0684152
332	0.279435	0.196396	0.123664	0.0715039	0.0371652		332	0.309586	0.24056	0.148435	0.0968697	0.0680925
332.2	0.27924	0.196734	0.123793	0.0718271	0.0371509		332.2	0.309323	0.24045	0.148856	0.0973191	0.0683798
332.4	0.279234	0.196703	0.123447	0.0726373	0.0367354		332.4	0.309035	0.239833	0.148676	0.0972352	0.0680928
332.6	0.278607	0.196456	0.123037	0.0723697	0.0358708		332.6	0.309194	0.239916	0.148582	0.0969741	0.0681851
332.8	0.278947	0.19689	0.123466	0.0726302	0.0362299		332.8	0.30928	0.240015	0.148463	0.0970224	0.0681976
333	0.278588	0.197235	0.123657	0.0729384	0.0362589		333	0.309581	0.239747	0.148858	0.0970249	0.0680088
333.2	0.278664	0.197957	0.123505	0.0728061	0.0361103		333.2	0.309699	0.239998	0.148932	0.0970716	0.0675496
333.4	0.278236	0.198452	0.123482	0.0723984	0.0359391		333.4	0.310682	0.240563	0.149504	0.097645	0.0680025
333.6	0.278976	0.198811	0.123523	0.0724654	0.0360919		333.6	0.311686	0.241002	0.149993	0.0977725	0.068105
333.8	0.279157	0.198594	0.123345	0.0722061	0.0364336		333.8	0.312553	0.241868	0.15024	0.0977697	0.0682743
334	0.27886	0.19861	0.123055	0.0719689	0.0363836		334	0.312987	0.242015	0.150577	0.097891	0.0685114
334.2	0.279045	0.198621	0.122956	0.0721609	0.0360905		334.2	0.313013	0.242246	0.150665	0.0976016	0.0687096
334.4	0.278745	0.197517	0.122853	0.0715542	0.0357443		334.4	0.313347	0.243214	0.151096	0.0977554	0.0690516
334.6	0.278936	0.197405	0.122933	0.0713687	0.0360427		334.6	0.313667	0.243595	0.151603	0.0977715	0.0691102
334.8	0.279509	0.197729	0.122756	0.0714465	0.0367713		334.8	0.313932	0.243871	0.152079	0.0984258	0.0692602
335	0.279561	0.197322	0.122607	0.0713377	0.0369685		335	0.313802	0.243837	0.152171	0.0979847	0.068852
335.2	0.279104	0.196602	0.122648	0.0710109	0.0372002		335.2	0.313831	0.243664	0.152766	0.0983205	0.0690373
335.4	0.279478	0.19672	0.123174	0.0714128	0.0377379		335.4	0.314025	0.243026	0.152476	0.0986153	0.0694532
335.6	0.2796	0.19705	0.123502	0.071677	0.0379914		335.6	0.313639	0.242184	0.151663	0.0982137	0.0689886
335.8	0.280078	0.197501	0.123919	0.0718969	0.0381146		335.8	0.313311	0.241806	0.151323	0.0978672	0.0687827
336	0.279896	0.196992	0.124363	0.0723052	0.0383463		336	0.312581	0.24085	0.150672	0.0974818	0.0684534
336.2	0.280172	0.19673	0.12489	0.0730227	0.0385184		336.2	0.311999	0.240217	0.150376	0.0969507	0.0684439
336.4	0.280572	0.19652	0.124717	0.0735237	0.0384808		336.4	0.311949	0.24019	0.149644	0.0966204	0.0684276
336.6	0.280171	0.19664	0.124506	0.0733231	0.0380631		336.6	0.311979	0.240686	0.149776	0.0961487	0.0685273
336.8	0.280315	0.197105	0.124585	0.0729635	0.0377989		336.8	0.311374	0.239991	0.149291	0.0959668	0.0679291
337	0.280165	0.197139	0.124456	0.0732645	0.0375778		337	0.311583	0.240541	0.149658	0.0962571	0.0684429
337.2	0.280815	0.197559	0.124612	0.0730481	0.0370102		337.2	0.311444	0.240256	0.149219	0.0962448	0.0684126
337.4	0.281237	0.197723	0.124672	0.0731815	0.0370275		337.4	0.31133	0.240167	0.149349	0.0961829	0.068241
337.6	0.281852	0.197804	0.124656	0.0731747	0.0371622		337.6	0.310794	0.239897	0.149614	0.0956522	0.0677447
337.8	0.282045	0.198084	0.124684	0.0725716	0.0370082		337.8	0.310968	0.24027	0.150073	0.0961445	0.0682573
338	0.281937	0.198076	0.124531	0.0724832	0.036876		338	0.31075	0.239925	0.150185	0.0958737	0.0680208
338.2	0.281841	0.197989	0.124539	0.0722985	0.036565		338.2	0.311096	0.240333	0.150681	0.0960719	0.0682832
338.4	0.282137	0.198032	0.124611	0.0718599	0.0366351		338.4	0.312006	0.24086	0.151295	0.0961555	0.0684182
338.6	0.282729	0.198956	0.12493	0.0719683	0.036861		338.6	0.31214	0.240885	0.151298	0.0961017	0.0682568
338.8	0.283632	0.199355	0.12517	0.0722042	0.0373658		338.8	0.312324	0.240877	0.151341	0.0959828	0.0678348
339	0.283166	0.198484	0.125317	0.0718897	0.0370104		339	0.312083	0.240975	0.151243	0.0958183	0.0675932
339.2	0.282812	0.198686	0.125542	0.0721172	0.0370509		339.2	0.311975	0.240675	0.15061	0.0959375	0.067663
339.4	0.283405	0.198811	0.125855	0.0722944	0.0375304		339.4	0.312562	0.240307	0.150192	0.0957032	0.0677074
339.6	0.283564	0.199101	0.125876	0.0720825	0.0375059		339.6	0.31304	0.240365	0.150084	0.0955088	0.0673473
339.8	0.283919	0.199318	0.126334	0.0727101	0.0379692		339.8	0.313477	0.240966	0.150257	0.0956371	0.0678501
340	0.283943	0.198935	0.126404	0.0729801	0.038076		340	0.313339	0.240562	0.149518	0.095076	0.0673472
340.2	0.283942	0.198722	0.126498	0.0730314	0.0378414		340.2	0.313234	0.240729	0.149518	0.0950095	0.0671041
340.4	0.284319	0.19898	0.126554	0.0735206	0.0380206		340.4	0.314265	0.241587	0.149361	0.0953242	0.0677278
340.6	0.283921	0.198792	0.126213	0.0736297	0.0371734		340.6	0.314346	0.242282	0.149897	0.0954928	0.0677945
340.8	0.283721	0.198354	0.126332	0.0733075	0.0368876		340.8	0.314006	0.241916	0.14952	0.0955145	0.0679571
341	0.28341	0.198107	0.126558	0.0739539	0.0366919		341	0.313856	0.241835	0.149547	0.0957004	0.0680068
341.2	0.2836	0.198228	0.126588	0.0739101	0.0360248		341.2	0.313612	0.241352	0.14951	0.0957993	0.0677179
341.4	0.283496	0.198051	0.126234	0.073805	0.0359464		341.4	0.31317	0.241547	0.14997	0.0960628	0.0676993
341.6	0.282922	0.197958	0.12587	0.0736107	0.035487		341.6	0.31347	0.241727	0.150604	0.0964434	0.0682989
341.8	0.282879	0.197631	0.125656	0.0733926	0.0353512		341.8	0.313898	0.24258	0.150641	0.097409	0.0691617
342	0.282566	0.197101	0.125169	0.0735261	0.0352247		342	0.314467	0.24281	0.150692	0.0979518	0.06944
342.2	0.282086	0.197233	0.124834	0.073219	0.035021		342.2	0.315253	0.243557	0.150785	0.0984423	0.0698003
342.4	0.282262	0.19757	0.125087	0.0734001	0.0352675		342.4	0.315479	0.243644	0.150633	0.0982678	0.0698169
342.6	0.282983	0.198371	0.125023	0.0739859	0.0356295		342.6	0.315379	0.243805	0.150609	0.0985104	0.0699145
342.8	0.283113	0.198337	0.125102	0.0742602	0.0356355		342.8	0.315331	0.243784	0.151075	0.0986265	0.0696192
343	0.281702	0.198203	0.124496	0.0740804	0.0352978		343	0.315416	0.244241	0.151769	0.0993948	0.0702639
343.2	0.281201	0.198778	0.124224	0.0741425	0.035297		343.2	0.31564	0.24429	0.151997	0.0995145	0.0701162
343.4	0.281089	0.199226	0.123909	0.0739796	0.0358431		343.4	0.316619	0.244206	0.152344	0.0995992	0.0702248
343.6	0.281469	0.199878	0.123793	0.073701	0.0362592		343.6	0.316836	0.243893	0.152457	0.0996748	0.0695102
343.8	0.282404	0.200014	0.124129	0.0739132	0.0366627		343.8	0.316638	0.243822	0.151645	0.0995133	0.0692425
344	0.282782	0.199898	0.123815	0.073474	0.0366363		344	0.316468	0.243136	0.151329	0.0986242	0.0684982
344.2	0.283843	0.200267	0.124289	0.0740284	0.0374215		344.2	0.316229	0.242953	0.151341	0.0986518	0.0682901
344.4	0.284699	0.200788	0.124836	0.0746509	0.0379172		344.4	0.316458	0.242996	0.150967	0.0985214	0.0681349
344.6	0.284736	0.200992	0.124485	0.0748192	0.037928		344.6	0.316018	0.243079	0.150848	0.0981569	0.067869
344.8	0.2854	0.201592	0.124801	0.0749463	0.0386389		344.8	0.315594	0.242723	0.150485	0.0974316	0.0678698
345	0.285361	0.201577	0.12484	0.0748595	0.0383885		345	0.315251	0.242751	0.150475	0.0973999	0.0681107
345.2	0.28573	0.202145	0.125176	0.0749897	0.0386736		345.2	0.315575	0.243883	0.150874	0.0980004	0.0688742
345.4	0.285608	0.201984	0.125353	0.0750215	0.0389523		345.4	0.315253	0.244062	0.150908	0.0981254	0.0689283
345.6	0.285516	0.201885	0.12566	0.0751374	0.0389217		345.6	0.315069	0.24402	0.150766	0.0979079	0.0690374
345.8	0.286035	0.201603	0.126279	0.0758169	0.0392507		345.8	0.314838	0.244308	0.150299	0.0980237	0.069109
346	0.286252	0.201518	0.126898	0.0760466	0.0395286		346	0.315008	0.244362	0.150957	0.098157	0.0697292
346.2	0.286482	0.201769	0.127499	0.0762093	0.0396885		346.2	0.315189	0.244291	0.151344	0.0976712	0.0695377
346.4	0.287149	0.201947	0.1278	0.0765902	0.0396224		346.4	0.315196	0.243661	0.151462	0.0978169	0.0698103
346.6	0.287636	0.202545	0.127994	0.0766641	0.0393763		346.6	0.315827	0.24374	0.152259	0.0981732	0.0703645
346.8	0.287561	0.202514	0.128799	0.0768218	0.0392409		346.8	0.316149	0.243876	0.153176	0.0983425	0.0707201
347	0.28637	0.202384	0.128885	0.0766706	0.039319		347	0.316563	0.244269	0.153501	0.0986654	0.0710696
347.2	0.286771	0.202543	0.129103	0.0767488	0.0390581		347.2	0.316451	0.243847	0.152753	0.0985647	0.0706641
347.4	0.287054	0.202568	0.129224	0.0767057	0.039392		347.4	0.317069	0.243447	0.152516	0.0985549	0.070702
347.6	0.286659	0.201948	0.128617	0.0757363	0.0390391		347.6	0.317146	0.243472	0.1523	0.0981951	0.0702383
347.8	0.286986	0.201944	0.128395	0.0755703	0.0388927		347.8	0.316905	0.243495	0.151305	0.0973964	0.0693585
348	0.287281	0.201951	0.128209	0.0754641	0.0393883		348	0.316849	0.243422	0.151195	0.097429	0.0691887
348.2	0.287675	0.202176	0.128335	0.0753644	0.0394151		348.2	0.316643	0.243995	0.151111	0.0976591	0.0688956
348.4	0.287027	0.202328	0.127944	0.0746884	0.0389243		348.4	0.316813	0.244831	0.150965	0.0982323	0.0689894
348.6	0.287079	0.202675	0.127605	0.0746197	0.0387833		348.6	0.31675	0.24509	0.150842	0.0980506	0.0690294
348.8	0.286948	0.202875	0.127559	0.0745189	0.0385887		348.8	0.316676	0.245605	0.150844	0.0982971	0.0690508
349	0.286267	0.202281	0.127092	0.0739149	0.0373547		349	0.317129	0.246523	0.15152	0.0992879	0.0696521
349.2	0.28662	0.203069	0.127592	0.0750879	0.0378363		349.2	0.31753	0.247233	0.151677	0.0994196	0.069349
349.4	0.286461	0.202828	0.127309	0.0751683	0.037381		349.4	0.316987	0.246359	0.151338	0.098852	0.0683637
349.6	0.286694	0.202489	0.126917	0.075178	0.0371769		349.6	0.317037	0.24579	0.151418	0.0981517	0.0682279
349.8	0.287228	0.202642	0.127053	0.0759508	0.0375591		349.8	0.317195	0.2454	0.151608	0.0983229	0.0682462
350	0.287298	0.202279	0.126727	0.0755587	0.0373213		350	0.317774	0.245245	0.152361	0.0984321	0.0683582
350.2	0.287711	0.20235	0.126756	0.0757936	0.0372981		350.2	0.318064	0.244586	0.152624	0.0982119	0.0684904
350.4	0.287586	0.202109	0.126435	0.0756682	0.0373781		350.4	0.318663	0.244006	0.152666	0.098693	0.0688969
350.6	0.287519	0.202451	0.126571	0.0758755	0.0374523		350.6	0.319414	0.244487	0.153312	0.0986565	0.0693914
350.8	0.28758	0.202647	0.127131	0.0763596	0.0380593		350.8	0.319752	0.244549	0.153436	0.0991069	0.0695377
351	0.287132	0.20218	0.12701	0.0759694	0.0380328		351	0.319648	0.244623	0.153657	0.0993998	0.0698714
351.2	0.287413	0.202548	0.127025	0.0757885	0.0380224		351.2	0.319419	0.244264	0.153374	0.0995206	0.0701671
351.4	0.286886	0.202711	0.127098	0.0756364	0.0384832		351.4	0.319851	0.244735	0.153877	0.0998605	0.070671
351.6	0.286287	0.202652	0.126219	0.0749588	0.0383458		351.6	0.319882	0.244949	0.153844	0.100205	0.070666
351.8	0.286606	0.203482	0.126677	0.0752575	0.0389633		351.8	0.319518	0.244949	0.15334	0.10015	0.0700887
352	0.287287	0.203685	0.127164	0.0751726	0.0394004		352	0.319676	0.245257	0.153903	0.101141	0.0707959
352.2	0.286922	0.204088	0.1276	0.0750748	0.0390673		352.2	0.319627	0.24581	0.154205	0.101489	0.0709381
352.4	0.287072	0.204756	0.127946	0.0751736	0.0393538		352.4	0.319406	0.245765	0.154001	0.101671	0.071239
352.6	0.287509	0.205045	0.128635	0.0755274	0.0394554		352.6	0.319363	0.245537	0.153754	0.101435	0.071193
352.8	0.287558	0.204933	0.128489	0.0753059	0.0389689		352.8	0.319291	0.246324	0.153711	0.101469	0.0710584
353	0.288014	0.205053	0.128749	0.0752698	0.0388576		353	0.319863	0.247015	0.15404	0.10118	0.0709536
353.2	0.288677	0.20555	0.128914	0.0759635	0.0395297		353.2	0.319939	0.246936	0.15379	0.10048	0.0703708
353.4	0.288834	0.20539	0.12846	0.0754523	0.0392284		353.4	0.31968	0.246604	0.153776	0.100039	0.0704607
353.6	0.289718	0.205446	0.128834	0.0758295	0.0396966		353.6	0.319797	0.246517	0.153944	0.0995343	0.0703753
353.8	0.289702	0.204642	0.128831	0.0760946	0.0395869		353.8	0.31984	0.24691	0.154272	0.0999419	0.0701996
354	0.290004	0.203803	0.128274	0.076037	0.0393067		354	0.320163	0.246948	0.154634	0.0996519	0.0700151
354.2	0.290443	0.203685	0.12842	0.0763208	0.0396037		354.2	0.320054	0.247198	0.154829	0.0994395	0.0696616
354.4	0.290146	0.202991	0.128166	0.0758862	0.0394013		354.4	0.320039	0.247375	0.15486	0.0996754	0.069293
354.6	0.290517	0.203362	0.128407	0.0760508	0.0393425		354.6	0.320046	0.247786	0.154999	0.100008	0.0694805
354.8	0.290324	0.203476	0.128742	0.0758693	0.0395793		354.8	0.320307	0.248221	0.155509	0.100927	0.0701913
355	0.289844	0.203011	0.128349	0.0751957	0.0392674		355	0.319817	0.248424	0.156212	0.101255	0.0707001
355.2	0.289717	0.203058	0.128398	0.07495	0.0390789		355.2	0.320268	0.248581	0.155837	0.101318	0.0710042
355.4	0.289509	0.203074	0.128404	0.0749898	0.0393551		355.4	0.320507	0.249067	0.156332	0.101932	0.0714291
355.6	0.289558	0.203105	0.127989	0.0746599	0.0391852		355.6	0.320082	0.248804	0.155866	0.101796	0.0711759
355.8	0.289756	0.203826	0.1284	0.0753025	0.0396548		355.8	0.320024	0.248738	0.15592	0.101424	0.0712097
356	0.289947	0.203953	0.128725	0.0751988	0.0394395		356	0.320587	0.248958	0.155934	0.101624	0.0714533
356.2	0.289402	0.204426	0.129165	0.0756789	0.0394198		356.2	0.320647	0.249199	0.155596	0.101248	0.0714055
356.4	0.289968	0.205242	0.129806	0.0758653	0.0401809		356.4	0.320344	0.248639	0.155201	0.100897	0.0712101
356.6	0.289772	0.205478	0.130132	0.076199	0.0401584		356.6	0.320524	0.248662	0.154984	0.10072	0.0708744
356.8	0.289503	0.205121	0.12978	0.0759199	0.0397169		356.8	0.320798	0.248856	0.155042	0.100714	0.0707532
357	0.289846	0.205644	0.130071	0.0760835	0.0401329		357	0.321377	0.249216	0.155495	0.100913	0.0711811
357.2	0.289904	0.205434	0.130008	0.0759654	0.0400657		357.2	0.321728	0.249171	0.155577	0.100899	0.0711628
357.4	0.290242	0.205912	0.13067	0.0763679	0.0404108		357.4	0.321472	0.249246	0.155379	0.10064	0.0713505
357.6	0.290665	0.206337	0.131242	0.076743	0.0410775		357.6	0.321503	0.249084	0.15543	0.100296	0.0706332
357.8	0.290194	0.205638	0.130949	0.0764614	0.0410539		357.8	0.3217	0.248977	0.155562	0.100775	0.0703808
358	0.290644	0.206011	0.131001	0.0764245	0.0412962		358	0.321638	0.248218	0.155219	0.100687	0.069881
358.2	0.290571	0.20601	0.131396	0.0762784	0.0415283		358.2	0.321378	0.248039	0.154924	0.101044	0.0694709
358.4	0.290501	0.205903	0.131547	0.0761001	0.0415777		358.4	0.320993	0.247463	0.154567	0.101433	0.0695727
358.6	0.290581	0.206112	0.131468	0.0760967	0.0417143		358.6	0.321165	0.24742	0.154462	0.101962	0.0699513
358.8	0.290046	0.205732	0.130922	0.0756812	0.0415815		358.8	0.321266	0.247635	0.154583	0.102367	0.0704029
359	0.290053	0.205319	0.13043	0.0754202	0.0412848		359	0.320974	0.247305	0.154372	0.102389	0.0703904
359.2	0.290305	0.205118	0.130198	0.0754376	0.0411626		359.2	0.321087	0.24729	0.153837	0.102356	0.0705058
359.4	0.290502	0.20516	0.129748	0.0757033	0.0413088		359.4	0.320649	0.247357	0.153905	0.102633	0.0707581
359.6	0.290843	0.205272	0.129225	0.0759996	0.0410136		359.6	0.320268	0.247253	0.153241	0.102368	0.0706617
359.8	0.291135	0.205554	0.128982	0.0765643	0.0409885		359.8	0.32046	0.247244	0.153236	0.102352	0.0708209
360	0.27409	0.19938	0.123749	0.0807312	0.0346209		360.01	0.312941	0.243262	0.139174	0.0924377	0.0601179
360.2	0.275966	0.200913	0.124486	0.0803946	0.0351346		360.21	0.31573	0.244042	0.138842	0.0918444	0.0595837
360.4	0.278331	0.202669	0.125408	0.0804674	0.0360174		360.41	0.318351	0.244772	0.138637	0.0913223	0.0591249
360.6	0.280953	0.204278	0.126544	0.0806494	0.0368353		360.61	0.321495	0.245863	0.138958	0.0910137	0.0591901
360.8	0.283251	0.205697	0.12727	0.0808053	0.0372878		360.81	0.324247	0.246647	0.138974	0.0902936	0.0588233
361	0.285492	0.207137	0.127985	0.0807871	0.0382383		361.01	0.32651	0.247305	0.138897	0.0896148	0.0589108
361.2	0.287338	0.208451	0.128586	0.0809683	0.0388154		361.21	0.328439	0.247695	0.138715	0.0893089	0.0587462
361.4	0.288546	0.209114	0.128549	0.0805856	0.0389223		361.41	0.329674	0.247685	0.13807	0.0891064	0.0583405
361.6	0.289329	0.209828	0.128688	0.0803596	0.0391682		361.61	0.330203	0.247524	0.137576	0.0888178	0.0578199
361.8	0.289563	0.209863	0.128398	0.0799683	0.038885		361.81	0.33052	0.247483	0.137415	0.0892272	0.0577493
362	0.289215	0.209629	0.127714	0.0796743	0.0388224		362.01	0.330115	0.247685	0.137174	0.0899321	0.0581051
362.2	0.288276	0.209195	0.127193	0.079693	0.0386009		362.21	0.329035	0.24702	0.136749	0.0904947	0.058155
362.4	0.287773	0.208802	0.126415	0.0794132	0.0377969		362.41	0.32844	0.245876	0.136543	0.090688	0.0579681
362.6	0.287241	0.208197	0.125879	0.0790666	0.0374398		362.61	0.327104	0.245028	0.135818	0.0910645	0.0580312
362.8	0.286361	0.207706	0.125332	0.07877	0.036766		362.81	0.326352	0.244227	0.135124	0.0912645	0.0577601
363	0.285832	0.207252	0.124918	0.0790614	0.036459		363.01	0.326382	0.243349	0.135258	0.0920932	0.057986
363.2	0.285497	0.206571	0.124277	0.0791439	0.0358989		363.21	0.325752	0.242737	0.134952	0.0918648	0.0576692
363.4	0.285223	0.206183	0.1243	0.0790932	0.0357111		363.41	0.325321	0.241728	0.133994	0.0914811	0.0576046
363.6	0.28523	0.206232	0.123673	0.0782184	0.0350225		363.61	0.324552	0.240769	0.133244	0.0910307	0.0575447
363.8	0.285056	0.20634	0.123508	0.0778709	0.0348065		363.81	0.32452	0.239848	0.132673	0.0905956	0.0572029
364	0.284608	0.20613	0.123489	0.0781845	0.0346417		364.01	0.324291	0.239165	0.132496	0.0910375	0.0569194
364.2	0.283482	0.205291	0.123207	0.0779263	0.0346747		364.21	0.323196	0.238255	0.131687	0.0908528	0.056237
364.4	0.283965	0.204952	0.123763	0.0784425	0.0351292		364.41	0.322159	0.237644	0.131544	0.0905717	0.0563383
364.6	0.284328	0.20425	0.123663	0.0784501	0.0347761		364.61	0.32158	0.237097	0.131793	0.0900645	0.056395
364.8	0.28426	0.203294	0.123212	0.0782099	0.0344775		364.81	0.320576	0.236177	0.131289	0.0890659	0.0561631
365	0.284321	0.203145	0.123274	0.0779397	0.0348337		365.01	0.319628	0.23576	0.131474	0.0884205	0.0565882
365.2	0.284062	0.202738	0.122993	0.0775488	0.034578		365.21	0.318284	0.235093	0.130937	0.0878495	0.0560457
365.4	0.283514	0.202022	0.122317	0.0765112	0.03369		365.41	0.316438	0.234414	0.13031	0.0872693	0.0554939
365.6	0.283646	0.202198	0.122492	0.0765784	0.0340481		365.61	0.315317	0.234493	0.130322	0.087304	0.0552077
365.8	0.28364	0.202029	0.122214	0.0761648	0.0337899		365.81	0.314078	0.234247	0.130196	0.0871884	0.055265
366	0.283937	0.202495	0.122167	0.0763059	0.0344087		366.01	0.312853	0.234138	0.129724	0.0866083	0.0550772
366.2	0.283864	0.202306	0.121933	0.0761702	0.0345481		366.21	0.311958	0.233103	0.129333	0.0861995	0.0548665
366.4	0.283753	0.20209	0.121776	0.0761988	0.0345517		366.41	0.311484	0.23278	0.129313	0.0860415	0.0551692
366.6	0.283408	0.201962	0.122199	0.0762689	0.0352433		366.61	0.310766	0.232735	0.129012	0.0859268	0.0553545
366.8	0.283048	0.202654	0.122817	0.0765382	0.0353343		366.81	0.310352	0.232373	0.128829	0.0853087	0.0548915
367	0.282862	0.202719	0.123009	0.0767023	0.0358141		367.01	0.310077	0.232	0.128893	0.0854577	0.0549554
367.2	0.282262	0.202924	0.122937	0.0763588	0.0357635		367.21	0.30953	0.232096	0.128512	0.0851505	0.0546944
367.4	0.282114	0.203336	0.123283	0.0759635	0.0357093		367.41	0.308641	0.231484	0.127923	0.0847693	0.0545053
367.6	0.282299	0.204068	0.123642	0.0763896	0.0360746		367.61	0.308685	0.231393	0.127825	0.0847193	0.0545817
367.8	0.281337	0.20388	0.123749	0.0769948	0.0360233		367.81	0.309042	0.231225	0.127832	0.0848461	0.0543965
368	0.28081	0.203723	0.124334	0.0778512	0.0367201		368.01	0.308159	0.229958	0.126849	0.0842895	0.053464
368.2	0.280317	0.204126	0.124813	0.0782211	0.037228		368.21	0.307951	0.229214	0.126257	0.0834842	0.0532519
368.4	0.280869	0.204356	0.125447	0.078919	0.0377557		368.41	0.308071	0.228844	0.126554	0.0833807	0.0539192
368.6	0.280363	0.203639	0.125035	0.0787464	0.0370161		368.61	0.308394	0.228413	0.126601	0.0832211	0.0537221
368.8	0.280413	0.20349	0.125366	0.0789166	0.0372934		368.81	0.308319	0.228227	0.126723	0.0833846	0.0540905
369	0.28018	0.203906	0.125366	0.0793133	0.0372572		369.01	0.307881	0.228333	0.126975	0.0833621	0.0546127
369.2	0.279645	0.203516	0.124849	0.0789985	0.0365004		369.21	0.307268	0.227887	0.126515	0.0837798	0.0543489
369.4	0.279637	0.203222	0.124486	0.0791473	0.0359421		369.41	0.306746	0.228014	0.126502	0.0842386	0.0545865
369.6	0.279503	0.203133	0.124181	0.0790623	0.0360311		369.61	0.305984	0.228131	0.126353	0.0844115	0.0545943
369.8	0.279555	0.202757	0.123848	0.0787494	0.036204		369.81	0.304744	0.227469	0.126092	0.0837474	0.0544242
370	0.279215	0.202	0.12342	0.0787292	0.0365803		370.01	0.304517	0.228161	0.126126	0.0838229	0.0547036
370.2	0.278493	0.201161	0.123392	0.0783702	0.0365392		370.21	0.304038	0.228019	0.126529	0.0843932	0.0551055
370.4	0.27853	0.200756	0.123614	0.0782558	0.0364476		370.41	0.303679	0.227838	0.126532	0.0843754	0.0553399
370.6	0.277875	0.199527	0.12326	0.077244	0.0360162		370.61	0.303102	0.227712	0.126378	0.0840414	0.05513
370.8	0.277523	0.199255	0.123181	0.0770896	0.0357235		370.81	0.302577	0.227387	0.126703	0.0840412	0.0549812
371	0.277326	0.198264	0.122698	0.0763185	0.0352209		371.01	0.302544	0.227053	0.127286	0.084323	0.0552971
371.2	0.277455	0.198034	0.122534	0.0761885	0.0352548		371.21	0.302399	0.227	0.12725	0.084244	0.0554628
371.4	0.278078	0.197816	0.122416	0.0762424	0.0350479		371.41	0.302083	0.226705	0.126953	0.0841194	0.0554916
371.6	0.277863	0.19761	0.122202	0.0769216	0.0352974		371.61	0.302187	0.22604	0.12685	0.0834971	0.055101
371.8	0.277581	0.197743	0.122063	0.0769607	0.0350458		371.81	0.302754	0.225015	0.126509	0.0830749	0.0552387
372	0.277966	0.197899	0.122263	0.0770495	0.0356452		372.01	0.302564	0.223779	0.125769	0.0828259	0.0550191
372.2	0.278696	0.198565	0.122322	0.077914	0.0363924		372.21	0.303153	0.223786	0.125899	0.0830216	0.0555556
372.4	0.278647	0.198065	0.121963	0.0775568	0.0361817		372.41	0.303284	0.22341	0.126153	0.0832978	0.0561278
372.6	0.278719	0.198519	0.122016	0.0777688	0.0362541		372.61	0.303147	0.223403	0.126111	0.0834718	0.0561295
372.8	0.278871	0.199338	0.122219	0.0779659	0.0363618		372.81	0.303058	0.223803	0.12671	0.0838598	0.0568162
373	0.278986	0.199809	0.122172	0.0784487	0.0364325		373.01	0.30251	0.223411	0.126156	0.0835288	0.0567835
373.2	0.278566	0.19982	0.122012	0.0780963	0.0363458		373.21	0.302038	0.222948	0.125561	0.0832402	0.0561538
373.4	0.278578	0.199673	0.122213	0.0783452	0.0367073		373.41	0.30135	0.223408	0.125597	0.0832	0.0563565
373.6	0.278212	0.199703	0.122247	0.0779384	0.0366372		373.61	0.301026	0.22347	0.125568	0.0831332	0.055912
373.8	0.278121	0.199738	0.122551	0.078042	0.0371212		373.81	0.300741	0.223598	0.125696	0.083253	0.0555801
374	0.278043	0.199738	0.122637	0.07831	0.037353		374.01	0.300122	0.223523	0.125564	0.0832676	0.0550583
374.2	0.278117	0.200415	0.123247	0.0783921	0.0374625		374.21	0.299371	0.222795	0.12539	0.0828974	0.054396
374.4	0.278033	0.20021	0.123312	0.0786861	0.0374085		374.41	0.299204	0.222548	0.125156	0.0827388	0.0541988
374.6	0.277514	0.199786	0.123632	0.07901	0.0372106		374.61	0.298957	0.222579	0.124891	0.0830206	0.0537311
374.8	0.277666	0.200502	0.123995	0.0796671	0.0373037		374.81	0.298666	0.221963	0.125271	0.0831872	0.0536465
375	0.277949	0.200588	0.124366	0.0801369	0.0376996		375.01	0.298821	0.221678	0.125453	0.0830771	0.0536214
375.2	0.277915	0.200936	0.124633	0.0801667	0.0380171		375.21	0.298485	0.221597	0.125152	0.0831594	0.0535917
375.4	0.277801	0.201125	0.124697	0.0803736	0.0380144		375.41	0.298115	0.221078	0.124914	0.0830894	0.0532724
375.6	0.277502	0.200921	0.12449	0.0806787	0.0382049		375.61	0.298001	0.220739	0.125079	0.0829445	0.053211
375.8	0.277781	0.2012	0.124764	0.0811662	0.0389191		375.81	0.297703	0.219925	0.124449	0.0831367	0.0531461
376	0.278193	0.201383	0.124858	0.0812446	0.0394003		376.01	0.29742	0.219334	0.124943	0.0834985	0.0537212
376.2	0.277877	0.200897	0.12467	0.0807482	0.0392553		376.21	0.29745	0.219707	0.125809	0.083947	0.05408
376.4	0.27711	0.200522	0.124358	0.0797145	0.0385665		376.41	0.296953	0.219274	0.125579	0.0837295	0.0545356
376.6	0.276888	0.200699	0.124307	0.0795349	0.0387907		376.61	0.29672	0.219221	0.12576	0.0835757	0.054592
376.8	0.276971	0.200749	0.124356	0.0796448	0.0389471		376.81	0.296807	0.219305	0.126244	0.083563	0.0550752
377	0.276502	0.200398	0.124224	0.0795461	0.0396578		377.01	0.296476	0.218777	0.125488	0.0831581	0.05464
377.2	0.276066	0.200214	0.124313	0.0793314	0.0395996		377.21	0.296248	0.218761	0.125235	0.083024	0.0548568
377.4	0.276117	0.200174	0.124505	0.0797769	0.0395122		377.41	0.296922	0.219283	0.125866	0.0838124	0.0555947
377.6	0.276081	0.200241	0.124451	0.079642	0.0395383		377.61	0.297516	0.219212	0.125535	0.0841004	0.0554484
377.8	0.276255	0.200069	0.124576	0.0797216	0.0396902		377.81	0.296883	0.219249	0.125345	0.0840317	0.0553238
378	0.276772	0.200086	0.124566	0.0801695	0.0399587		378.01	0.296352	0.218711	0.12491	0.0837616	0.0549369
378.2	0.276637	0.200155	0.124498	0.0801474	0.0398437		378.21	0.296231	0.218998	0.124823	0.0832794	0.0550269
378.4	0.276235	0.199467	0.12422	0.0801858	0.0395809		378.41	0.296391	0.219452	0.12475	0.0838064	0.0553416
378.6	0.276185	0.198661	0.123982	0.080237	0.0392774		378.61	0.296271	0.219247	0.124616	0.0842269	0.0554268
378.8	0.276223	0.198729	0.123725	0.0805446	0.0392969		378.81	0.295649	0.219174	0.124856	0.0843601	0.0557149
379	0.276357	0.198664	0.123975	0.0812366	0.0398322		379.01	0.295696	0.218987	0.124677	0.0837898	0.0558321
379.2	0.276263	0.198917	0.123809	0.0811276	0.0398353		379.21	0.295202	0.21855	0.124491	0.0833866	0.0553331
379.4	0.276661	0.198845	0.12352	0.0813261	0.0402343		379.41	0.294467	0.21804	0.123977	0.0828203	0.0552598
379.6	0.276855	0.198638	0.123306	0.0814722	0.0402401		379.61	0.294043	0.217649	0.123544	0.0825688	0.0552597
379.8	0.277184	0.199084	0.123244	0.0812148	0.0404649		379.81	0.294061	0.217054	0.122861	0.0823601	0.055178
380	0.277159	0.199028	0.123627	0.0806857	0.0401313		380.01	0.293896	0.217066	0.122867	0.0821757	0.0553388
380.2	0.277055	0.198693	0.123643	0.0802356	0.0398457		380.21	0.293172	0.216748	0.121942	0.0819525	0.0546697
380.4	0.276927	0.199238	0.123506	0.0801911	0.0398141		380.41	0.292467	0.216478	0.120861	0.0817461	0.054755
380.6	0.276837	0.199348	0.123423	0.0801103	0.0399554		380.61	0.292698	0.216376	0.120841	0.0814855	0.0547007
380.8	0.277089	0.199873	0.123893	0.0805531	0.040629		380.81	0.292985	0.216757	0.120696	0.0813379	0.0547656
381	0.276123	0.199098	0.1236	0.0797996	0.0397837		381.01	0.292711	0.217161	0.120037	0.0814917	0.0545264
381.2	0.276455	0.199581	0.124389	0.0801313	0.0396396		381.21	0.292554	0.217317	0.120226	0.0819347	0.054543
381.4	0.276066	0.199331	0.124594	0.0801056	0.0393078		381.41	0.29301	0.217894	0.120516	0.0826442	0.0548108
381.6	0.275837	0.199218	0.124913	0.080108	0.0392568		381.61	0.29352	0.218417	0.120422	0.0832373	0.0548409
381.8	0.276066	0.199446	0.125279	0.0808342	0.0394481		381.81	0.293196	0.218232	0.120481	0.0829765	0.0541816
382	0.275953	0.199319	0.125474	0.0811661	0.0394826		382.01	0.293072	0.218148	0.120884	0.08326	0.0543863
382.2	0.275697	0.199002	0.125115	0.0811081	0.0392693		382.21	0.292801	0.21838	0.121128	0.0836617	0.0545007
382.4	0.275581	0.198253	0.124797	0.0810773	0.0393781		382.41	0.292999	0.218499	0.121592	0.084263	0.0545753
382.6	0.275764	0.198036	0.125061	0.0816517	0.0396213		382.61	0.292344	0.217763	0.12179	0.0842367	0.053965
382.8	0.275708	0.197733	0.124784	0.081661	0.0396209		382.81	0.291507	0.217294	0.121529	0.0841511	0.0534945
383	0.275241	0.197473	0.124329	0.0810917	0.0395914		383.01	0.291721	0.216667	0.121666	0.0838447	0.0535035
383.2	0.274887	0.197036	0.123455	0.0803366	0.0391908		383.21	0.291097	0.21618	0.121817	0.0834825	0.0532165
383.4	0.274341	0.196716	0.122442	0.0800074	0.0389314		383.41	0.290686	0.215673	0.121517	0.0834299	0.0534007
383.6	0.274437	0.197189	0.122412	0.0800155	0.0388218		383.61	0.290574	0.21508	0.121576	0.0831574	0.0534872
383.8	0.274288	0.197559	0.122395	0.079588	0.0389555		383.81	0.290171	0.214695	0.121058	0.0824036	0.0536193
384	0.273546	0.19712	0.122477	0.0800661	0.0391327		384.01	0.289728	0.214135	0.120763	0.081861	0.0532724
384.2	0.273215	0.197512	0.122206	0.0801783	0.039168		384.21	0.289606	0.213845	0.120807	0.0818354	0.0534542
384.4	0.273006	0.197815	0.12203	0.0801052	0.039492		384.41	0.28973	0.214378	0.121294	0.0822529	0.0541054
384.6	0.272413	0.196827	0.121528	0.0791357	0.0390467		384.61	0.290079	0.213867	0.121248	0.0817867	0.0542585
384.8	0.272274	0.196279	0.121284	0.0788178	0.0387728		384.81	0.28971	0.21434	0.121705	0.081578	0.0544181
385	0.271908	0.195592	0.121111	0.0782851	0.0379888		385.01	0.289118	0.21428	0.121637	0.0813585	0.0546621
385.2	0.271502	0.195671	0.12126	0.0780219	0.0380929		385.21	0.289307	0.214319	0.122325	0.0815953	0.0548879
385.4	0.271106	0.195299	0.121066	0.0779868	0.0379111		385.41	0.289338	0.214797	0.122097	0.081546	0.0553203
385.6	0.271041	0.195552	0.121176	0.0784706	0.0378803		385.61	0.289536	0.214705	0.121918	0.0813814	0.0551617
385.8	0.270825	0.195631	0.121109	0.0789283	0.0376459		385.81	0.289307	0.214436	0.121998	0.0812293	0.0550051
386	0.271024	0.195533	0.121412	0.0792574	0.0374155		386.01	0.28902	0.215153	0.122488	0.082147	0.055853
386.2	0.271008	0.195312	0.121109	0.0789761	0.037209		386.21	0.288441	0.214871	0.122287	0.0818984	0.0554052
386.4	0.271347	0.195212	0.121245	0.0790611	0.037253		386.41	0.287938	0.21432	0.121881	0.0812592	0.0546553
386.6	0.2709	0.195437	0.121596	0.078969	0.037052		386.61	0.286983	0.213774	0.121184	0.0809857	0.0539145
386.8	0.270319	0.194602	0.120513	0.077913	0.0362658		386.81	0.286207	0.213677	0.120787	0.0810352	0.0535055
387	0.270426	0.195293	0.120499	0.0778524	0.0363264		387.01	0.28578	0.213875	0.120567	0.0808745	0.0536155
387.2	0.271051	0.195749	0.120604	0.0781442	0.0363915		387.21	0.285527	0.213935	0.120609	0.0808992	0.053434
387.4	0.270437	0.196307	0.120664	0.0782936	0.036482		387.41	0.285117	0.213486	0.120739	0.0809317	0.0536683
387.6	0.271223	0.19722	0.121585	0.0788521	0.0369985		387.61	0.284968	0.21336	0.120498	0.0808044	0.0536143
387.8	0.270876	0.197188	0.121533	0.078721	0.0372003		387.81	0.284818	0.213425	0.120035	0.0806829	0.0538999
388	0.270597	0.197278	0.121676	0.0793309	0.0376875		388.01	0.285101	0.21363	0.119932	0.080891	0.0538901
388.2	0.270796	0.197748	0.12186	0.0795944	0.0381933		388.21	0.285004	0.213876	0.120105	0.0812555	0.0542357
388.4	0.27097	0.197269	0.121566	0.0793312	0.0383851		388.41	0.285157	0.21354	0.119678	0.0811292	0.0543
388.6	0.270666	0.196753	0.121485	0.0789361	0.0382358		388.61	0.28536	0.213401	0.119498	0.0811415	0.0548325
388.8	0.27148	0.196696	0.121558	0.0792119	0.0387176		388.81	0.285361	0.213577	0.120054	0.0813453	0.0550926
389	0.272332	0.196838	0.121699	0.0793823	0.0389049		389.01	0.285732	0.213324	0.119455	0.0813312	0.0550676
389.2	0.2727	0.196508	0.121647	0.079475	0.0388838		389.21	0.286071	0.213293	0.119439	0.0818665	0.0551228
389.4	0.273778	0.196736	0.121962	0.0806454	0.03952		389.41	0.285575	0.212821	0.11884	0.0814771	0.0547393
389.6	0.273672	0.196706	0.121791	0.0805425	0.0391426		389.61	0.285144	0.212197	0.11866	0.0816262	0.054502
389.8	0.273314	0.196922	0.121624	0.0810171	0.0391447		389.81	0.285549	0.21232	0.118909	0.0817038	0.0546643
390	0.273444	0.196584	0.121756	0.0809813	0.0391968		390.01	0.284775	0.212379	0.11852	0.0816433	0.0544308
390.2	0.272888	0.196088	0.121666	0.0806329	0.0391524		390.21	0.284008	0.210989	0.117597	0.0803884	0.0530448
390.4	0.272688	0.196152	0.121819	0.081373	0.0391008		390.41	0.283704	0.210469	0.117218	0.0805983	0.0525401
390.6	0.271667	0.196098	0.122001	0.0816265	0.0388639		390.61	0.283484	0.210396	0.117194	0.0806584	0.0524075
390.8	0.271243	0.195719	0.121633	0.0817044	0.0384841		390.81	0.283025	0.210456	0.117226	0.0808392	0.0517697
391	0.271693	0.196039	0.122053	0.081853	0.0389061		391.01	0.282722	0.210206	0.11698	0.080283	0.0515917
391.2	0.271239	0.195666	0.122006	0.0815717	0.0384508		391.21	0.282864	0.209888	0.117443	0.0808676	0.051809
391.4	0.270184	0.195538	0.12197	0.0814674	0.0379668		391.41	0.282238	0.209378	0.117375	0.0808168	0.0516519
391.6	0.269951	0.195301	0.121784	0.0816571	0.0378205		391.61	0.282201	0.20957	0.116866	0.0809827	0.0517205
391.8	0.269358	0.195047	0.121429	0.0808445	0.0377176		391.81	0.281576	0.208891	0.116553	0.0802929	0.0515192
392	0.268319	0.194444	0.120965	0.0800701	0.0369316		392.01	0.281752	0.208777	0.116366	0.0800804	0.0515987
392.2	0.267961	0.19386	0.120609	0.0791909	0.0366266		392.21	0.281647	0.208566	0.116731	0.0803709	0.0523593
392.4	0.267824	0.19352	0.120611	0.0789399	0.0362059		392.41	0.281783	0.208485	0.116637	0.0800135	0.0524052
392.6	0.268183	0.193529	0.120617	0.0789801	0.0364658		392.61	0.281881	0.208392	0.11738	0.0803028	0.0530782
392.8	0.26901	0.193765	0.120647	0.0788383	0.0366396		392.81	0.281605	0.208266	0.117377	0.0802324	0.0527275
393	0.270181	0.19389	0.120985	0.079332	0.0368416		393.01	0.281126	0.208019	0.116795	0.0798668	0.0521626
393.2	0.270677	0.193466	0.120767	0.0795248	0.0370034		393.21	0.280342	0.207949	0.116813	0.0797991	0.0523429
393.4	0.270988	0.193577	0.120552	0.0798827	0.0373732		393.41	0.279883	0.207913	0.116968	0.0798993	0.0522596
393.6	0.270966	0.193598	0.120601	0.0792868	0.0377169		393.61	0.280253	0.208574	0.117354	0.0803586	0.0527755
393.8	0.270554	0.193278	0.120095	0.0789662	0.0377462		393.81	0.281016	0.20907	0.1174	0.080641	0.0529978
394	0.27042	0.193026	0.120095	0.078476	0.037703		394.01	0.280339	0.208954	0.116882	0.0805918	0.0527999
394.2	0.270668	0.192999	0.120091	0.0786292	0.0378901		394.21	0.280337	0.208397	0.116909	0.0805878	0.0526557
394.4	0.27085	0.19314	0.120398	0.079184	0.0377493		394.41	0.280637	0.208866	0.117417	0.0812988	0.0532864
394.6	0.270233	0.192648	0.120199	0.0786217	0.0373445		394.61	0.281026	0.209264	0.117408	0.081146	0.0531806
394.8	0.269698	0.192308	0.119668	0.0780491	0.0370331		394.81	0.280934	0.209001	0.117112	0.0813174	0.0526967
395	0.270296	0.192865	0.120215	0.0784879	0.0377506		395.01	0.280948	0.209097	0.116719	0.0811711	0.0529138
395.2	0.27013	0.193458	0.120826	0.078871	0.0381099		395.21	0.281622	0.209145	0.11693	0.0816872	0.0533702
395.4	0.270069	0.193901	0.121236	0.0793051	0.0382585		395.41	0.281866	0.209263	0.116781	0.081629	0.053285
395.6	0.26974	0.194075	0.121179	0.0792355	0.0385064		395.61	0.282165	0.209448	0.117322	0.0815544	0.0540459
395.8	0.269148	0.194219	0.121206	0.0784101	0.0382392		395.81	0.282232	0.209119	0.117774	0.0810043	0.0540986
396	0.268865	0.194376	0.121236	0.078446	0.0380367		396.01	0.282752	0.209169	0.118086	0.0809373	0.0544883
396.2	0.269029	0.194599	0.121688	0.0788554	0.0384894		396.21	0.282723	0.208998	0.118154	0.0805726	0.0548928
396.4	0.268877	0.194743	0.121796	0.0795458	0.0385015		396.41	0.282614	0.209343	0.118253	0.0804744	0.0548144
396.6	0.269005	0.194845	0.121573	0.0797696	0.0389512		396.61	0.28226	0.209056	0.118572	0.0806647	0.054964
396.8	0.269403	0.19558	0.121888	0.0804235	0.0395786		396.81	0.281235	0.209087	0.117919	0.0806097	0.0543417
397	0.26992	0.195739	0.122153	0.0810431	0.0400893		397.01	0.280944	0.208877	0.117647	0.0808782	0.0542015
397.2	0.270064	0.195611	0.121969	0.0814626	0.0407874		397.21	0.281034	0.209162	0.117938	0.0815013	0.0545391
397.4	0.270553	0.195735	0.121953	0.0815547	0.0408512		397.41	0.281163	0.209186	0.118009	0.0817859	0.054746
397.6	0.27064	0.195428	0.121722	0.0813153	0.0410672		397.61	0.28117	0.209122	0.118347	0.0821533	0.0554231
397.8	0.270081	0.194973	0.121097	0.0807751	0.0402384		397.81	0.280733	0.208265	0.118199	0.0821439	0.0552202
398	0.270201	0.19489	0.120907	0.0806583	0.0398273		398.01	0.279588	0.20776	0.117933	0.0817837	0.0549834
398.2	0.270517	0.194302	0.120923	0.0803299	0.0395351		398.21	0.279273	0.20782	0.118095	0.0823967	0.0548084
398.4	0.270389	0.194068	0.120896	0.0800934	0.039242		398.41	0.27872	0.20734	0.117612	0.0817886	0.0541092
398.6	0.269705	0.193255	0.12064	0.079371	0.0388723		398.61	0.278834	0.206852	0.117166	0.0810695	0.053427
398.8	0.269747	0.193081	0.120713	0.0795012	0.0388536		398.81	0.278479	0.20628	0.116682	0.0808573	0.0533066
399	0.270054	0.193523	0.12103	0.0796494	0.0390846		399.01	0.27868	0.206148	0.116234	0.0800399	0.0529731
399.2	0.269336	0.193141	0.121126	0.078878	0.0387047		399.21	0.279333	0.205622	0.116336	0.0792422	0.0526543
[truncated: 1,603 more rows]
